# Supplementary material for: Asymmetric synthesis of complex tricyclo[3.2.2.0]nonenes from racemic norcaradienes: kinetic resolutionviaDiels–Alder reaction
Source: Royal Society of Chemistry journal article supplement (doi:10.1039/d2sc06490a), 2023-01-01

## Supporting Information

### Asymmetric Synthesis of Complex Tricyclo[3.2.2.0]nonenes from Racemic Norcaradienes: Kinetic Resolution via Diels–Alder Reaction

Siyuan Wang, Yuqiao Zhou, Wanlong Xiao, Zegong Li, Xiaohua Liu,\* and Xiaoming Feng\*

<sup>1</sup>Key Laboratory of Green Chemistry & Technology, Ministry of Education, College of Chemistry, Sichuan University, Chengdu 610064, China.

E-mail: [liuxh@scu.edu.cn](mailto:liuxh@scu.edu.cn), [xmfeng@scu.edu.cn](mailto:xmfeng@scu.edu.cn)

|                                                                                           |     |
|-------------------------------------------------------------------------------------------|-----|
| <b>1. General</b> .....                                                                   | 2   |
| <b>2. Preparation of racemic norcaradienes</b> .....                                      | 3   |
| <b>3. General procedure for the preparation of the racemic products</b> .....             | 8   |
| <b>4. General procedure for the asymmetric Diels–Alder reaction</b> .....                 | 8   |
| <b>5. Optimization of the reaction conditions</b> .....                                   | 10  |
| <b>6. Optimization of the reaction conditions for <math>\beta</math>-nitroenone</b> ..... | 14  |
| <b>7. X-ray crystallography</b> .....                                                     | 20  |
| <b>8. Control experiments and mechanistic studies</b> .....                               | 24  |
| <b>9. Substrates scope limitation</b> .....                                               | 52  |
| <b>10. Analysis Results of 2D NMR Spectra of the Product 3aa</b> .....                    | 53  |
| <b>11. Characterization of the product</b> .....                                          | 54  |
| <b>12. References</b> .....                                                               | 99  |
| <b>13. Copies of NMR spectra</b> .....                                                    | 100 |

## 1. General

<sup>1</sup>H NMR spectra were recorded on Bruker ASCEND (400 MHz or 600 MHz). Chemical shifts are reported in ppm from the tetramethylsilane with the solvent resonance as internal standard (CDCl<sub>3</sub>, δ = 77.0; CD<sub>3</sub>OD, 48.8). Data were reported as follows: chemical shift, multiplicity (s = singlet, d = doublet, t = triplet, m = multiplet, br = broad), coupling constants (Hz), integration. <sup>13</sup>C{<sup>1</sup>H} NMR data were collected on Bruker ASCEND (100 MHz or 150 MHz) with complete proton decoupling. <sup>19</sup>F{<sup>1</sup>H} NMR spectra were collected on Bruker ASCEND (376 MHz or 565 MHz) with complete proton decoupling. Melting points (M.p.) were determined using OptiMelt automated melting point system. High resolution mass spectra (HRMS) analyses were recorded on Thermo Scientific Q Exactive hybrid quadrupole-Orbitrap mass spectrometer (ESI Source) and methanol were used to dissolve the sample. Enantiomeric excesses (ee) were determined by HPLC or UPC<sup>2</sup> analysis by using the corresponding commercial chiralpak column as stated in the experimental procedures at 25 °C, and SFC at 35 °C with PDA detector. Optical rotations were measured on a Rudolph Autopol V automatic polarimeter and are reported as follows:  $[\alpha]_{\lambda}^T = (c = \text{g}/100 \text{ mL, in solvent})$ . IR spectra were recorded on Bruker TENSOR II IR spectrophotometer. Unless otherwise indicated, reagents obtained from commercial sources were used without further purification. Solvents were dried and distilled prior to use according to the standard methods. Metal salts obtained from commercial sources were used without further purification. The chiral *N,N'*-dioxide ligands were synthesized by the same procedure in the literature.<sup>[1]</sup> (*E*)-ethyl 4-oxo-4-phenylbutenoates **3** were prepared according to literature procedure.<sup>[2]</sup> The α-diazoester were synthesized by following the literature procedure.<sup>[3]</sup> The norcaradienes were synthesized from *m*-xylene and α-diazoesters with Photoreactor following the literature procedure.<sup>[4]</sup> The β-nitroenones were synthesized following the literature procedure<sup>[5]</sup>.

Note: 1,1,2,2-Tetrachloroethane is toxic by inhalation and in contact with skin, and should be used carefully.

## 2. Preparation of racemic norcaradienes

Starting materials of norcaradienes (NCDs) were prepared according to reported procedure<sup>[4]</sup>

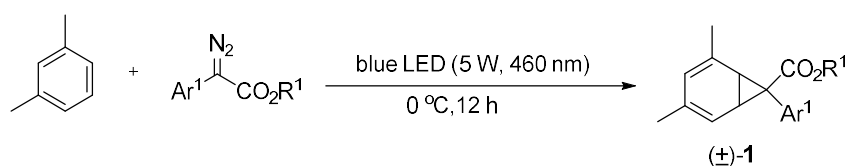

The norcaradienes were synthesized from *m*-xylene and  $\alpha$ -diazoesters with photoreactor following the literature procedure.<sup>[4]</sup> The reaction was conducted with *m*-xylene (6.0 mL) and the corresponding  $\alpha$ -diazoester (0.3 mmol) in a quartz test tube and under air on the irradiation from 5 W blue LED (460 nm) at 0 °C<sup>[4]</sup>. After 12 hours, the complex was purified by column chromatography using petroleum ether/EtOAc as eluent to afford the racemic norcaradiene ( $\pm$ )-1.

### 1b: methyl 7-(4-chlorophenyl)-2,4-dimethylbicyclo[4.1.0]hepta-2,4-diene-7-carboxylate

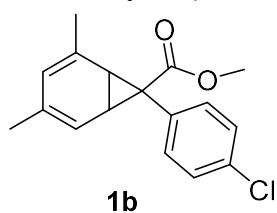

White solid, m.p. 82–84 °C.

<sup>1</sup>H NMR (400 MHz, Chloroform-*d*)  $\delta$  = 7.13 (d,  $J$  = 8.4 Hz, 2H), 6.93 (d,  $J$  = 8.4 Hz, 2H), 5.70 (d,  $J$  = 5.2 Hz, 1H), 5.39 (s, 1H), 3.63 (s, 3H), 3.09 (dd,  $J$  = 8.8, 5.6 Hz, 1H), 2.95 (d,  $J$  = 8.8 Hz, 1H), 2.04 (s, 3H), 1.50 (s, 3H) ppm.

<sup>13</sup>C NMR (101 MHz, CDCl<sub>3</sub>)  $\delta$  = 176.8, 134.5, 134.0, 133.6, 132.4, 131.6, 127.4,

125.6, 116.8, 52.9, 41.3, 39.6, 26.0, 23.9, 21.2 ppm.

ESI-HRMS calcd for [C<sub>17</sub>H<sub>17</sub>ClO<sub>2</sub>+Na<sup>+</sup>] = 311.0809, 313.0780, found 311.0806, 313.0783.

IR  $\tilde{\nu}$  (cm<sup>-1</sup>) 2950, 1710, 1493, 1433, 1335, 1237, 1090, 1015, 903, 836, 740, 560, 524, 476.

### 1c: methyl 7-(4-bromophenyl)-2,4-dimethylbicyclo[4.1.0]hepta-2,4-diene-7-carboxylate

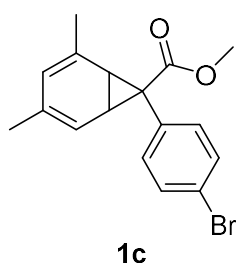

White solid, m.p. 115–117 °C.

<sup>1</sup>H NMR (400 MHz, Chloroform-*d*)  $\delta$  = 7.30 – 7.27 (m, 2H), 6.89 – 6.84 (m, 2H), 5.70 (d,  $J$  = 5.2 Hz, 1H), 5.40 (s, 1H), 3.63 (s, 3H), 3.11 – 3.07 (dd,  $J$  = 8.8, 6.4 Hz, 1H), 2.94 (d,  $J$  = 12.0 Hz, 1H), 2.04 (s, 3H), 1.51 (s, 3H) ppm.

<sup>13</sup>C NMR (101 MHz, CDCl<sub>3</sub>)  $\delta$  = 176.7, 134.5, 134.3, 133.6, 132.2, 130.3, 125.6, 120.7, 116.8, 52.9, 41.3, 39.6, 26.1, 23.9, 21.2 ppm.

ESI-HRMS calcd for [C<sub>17</sub>H<sub>17</sub>BrO<sub>2</sub>+Na<sup>+</sup>] = 355.0304, 356.0338, 357.0284, found 355.0306, 356.0341, 357.0280.

IR  $\tilde{\nu}$  (cm<sup>-1</sup>) 2949, 1710, 1487, 1433, 1394, 1334, 1236, 1162, 1070, 1010, 970, 903, 807, 763, 738, 710, 555, 433.

### 1d: methyl 7-(4-iodophenyl)-2,4-dimethylbicyclo[4.1.0]hepta-2,4-diene-7-carboxylate

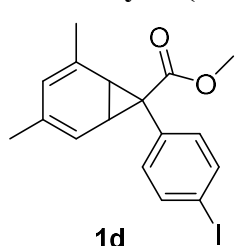

White solid, m.p. 127–128 °C.

<sup>1</sup>H NMR (400 MHz, Chloroform-*d*)  $\delta$  = 7.48 (d,  $J$  = 8.4 Hz, 2H), 6.74 (d,  $J$  = 8.4 Hz, 2H), 5.70 (d,  $J$  = 5.2 Hz, 1H), 5.40 (s, 1H), 3.62 (s, 3H), 3.13 – 3.04 (dd,  $J$  = 8.8, 5.6 Hz, 1H), 2.94 (d,  $J$  = 8.0 Hz, 1H), 2.03 (s, 3H), 1.51 (s, 3H) ppm.

<sup>13</sup>C NMR (101 MHz, CDCl<sub>3</sub>)  $\delta$  = 176.7, 136.37, 134.6, 134.5, 133.6, 132.9, 125.7,

116.8, 92.6, 52.9, 41.3, 39.7, 26.3, 23.9, 21.3 ppm.

**ESI-HRMS** calcd for  $[C_{17}H_{17}BrO_2+Na^+]$  = 403.0165, found 403.0163.

**IR**  $\tilde{\nu}$  ( $cm^{-1}$ ) 2949, 1710, 1493, 1433, 1335, 1237, 1090, 1015, 903, 836, 740, 560, 524, 476.

**1e: methyl 2,4-dimethyl-7-(p-tolyl)bicyclo[4.1.0]hepta-2,4-diene-7-carboxylate**

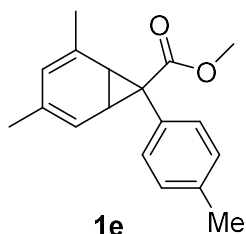

White solid, m.p. 101–103 °C.

**$^1H$  NMR** (400 MHz, Chloroform-*d*)  $\delta$  = 6.97 (d,  $J$  = 7.9 Hz, 2H), 6.88 (d,  $J$  = 8.0 Hz, 2H), 5.71 (d,  $J$  = 5.2 Hz, 1H), 5.39 (s, 1H), 3.63 (s, 3H), 3.09 (dd,  $J$  = 8.4, 5.6 Hz, 1H), 2.95 (d,  $J$  = 8.6 Hz, 1H), 2.28 (s, 3H), 2.04 (s, 3H), 1.50 (s, 3H) ppm.

**$^{13}C$  NMR** (101 MHz,  $CDCl_3$ )  $\delta$  = 177.5, 136.1, 134.2, 133.7, 132.3, 130.0, 127.8, 125.4, 117.1, 52.8, 41.9, 40.2, 26.5, 23.9, 21.3, 21.3 ppm.

**ESI-HRMS** calcd for  $[C_{18}H_{20}O_2+Na^+]$  = 291.1356, found 291.1359.

**IR**  $\tilde{\nu}$  ( $cm^{-1}$ ) 2949, 1709, 1517, 1433, 1335, 1238, 1002, 812, 714, 601, 546.

**1f: methyl 7-(4-methoxyphenyl)-2,4-dimethylbicyclo[4.1.0]hepta-2,4-diene-7-carboxylate**

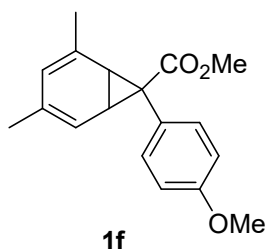

White solid, m.p. 72–73 °C.

**$^1H$  NMR** (400 MHz, Chloroform-*d*)  $\delta$  = 6.91 (d,  $J$  = 8.0 Hz, 2H), 6.70 (d,  $J$  = 8.0 Hz, 2H), 5.70 (d,  $J$  = 4.0 Hz, 1H), 5.39 (s, 1H), 3.75 (s, 3H), 3.63 (s, 3H), 3.07 (dd,  $J$  = 8.8, 5.6 Hz, 1H), 2.93 (d,  $J$  = 8.0 Hz, 1H), 2.04 (s, 3H), 1.50 (s, 3H) ppm.

**$^{13}C$  NMR** (101 MHz,  $CDCl_3$ )  $\delta$  = 177.6, 158.1, 134.3, 133.7, 133.6, 125.4, 125.1, 117.0, 112.5, 55.0, 52.8, 41.5, 39.9, 26.0, 23.9, 21.3 ppm.

**ESI-HRMS** calcd for  $[C_{18}H_{20}O_3+Na^+]$  = 307.1305, found 307.1307.

**IR**  $\tilde{\nu}$  ( $cm^{-1}$ ) 2950, 1705, 1611, 1513, 1434, 1335, 1291, 1232, 1174, 1107, 1032, 969, 902, 835, 813, 765, 738, 658, 626, 603, 555.

**1g: methyl 2,4-dimethyl-7-(4-(4,4,5,5-tetramethyl-1,3,2-dioxaborolan-2-yl)phenyl)bicyclo[4.1.0]hepta-2,4-diene-7-carboxylate**

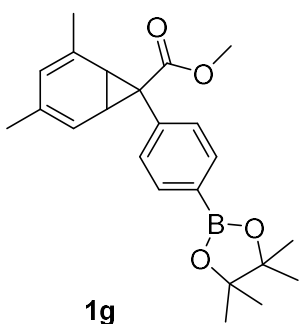

White solid, m.p. 115–118 °C.

**$^1H$  NMR** (400 MHz, Chloroform-*d*)  $\delta$  = 7.61 (d,  $J$  = 8.0 Hz, 2H), 7.01 (d,  $J$  = 8.0 Hz, 2H), 5.72 (d,  $J$  = 5.2 Hz, 1H), 5.36 (s, 1H), 3.61 (s, 3H), 3.11 (dd,  $J$  = 8.8, 5.6 Hz, 1H), 2.97 (d,  $J$  = 12.0 Hz, 1H), 2.04 (s, 3H), 1.48 (s, 3H), 1.32 (s, 12H) ppm.

**$^{13}C$  NMR** (101 MHz,  $CDCl_3$ )  $\delta$  = 177.1, 136.4, 135.2, 134.3, 133.6, 133.5, 132.0, 129.7, 127.4, 125.5, 117.0, 83.7, 52.9, 41.8, 40.1, 26.9, 25.0, 24.9, 24.9, 23.8, 21.3 ppm.

**ESI-HRMS** calcd for  $[C_{23}H_{29}BO_4+Na^+]$  = 402.2087, found 403.2051.

**IR**  $\tilde{\nu}$  ( $cm^{-1}$ ) 2977, 1710, 1611, 1433, 1396, 1357, 1318, 1238, 1143, 1089, 1020, 962, 903, 857, 736, 658, 557.



**1h: methyl 7-(2-chlorophenyl)-2,4-dimethylbicyclo[4.1.0]hepta-2,4-diene-7-carboxylate**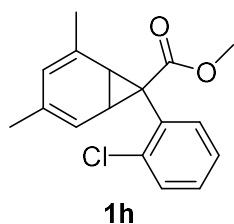

White solid, m.p. 105–108 °C.

<sup>1</sup>H NMR (400 MHz, Chloroform-*d*)  $\delta$  = 7.27 (d,  $J$  = 7.0 Hz, 1H), 7.11 (m, 1H), 7.04 – 6.92 (m, 2H), 5.80 (d,  $J$  = 4.8 Hz, 1H), 5.46 (s, 1H), 3.66 (s, 3H), 3.11 (m, 1H), 3.04 – 2.89 (m, 1H), 2.15 (s, 3H), 1.47 (s, 3H) ppm.

<sup>13</sup>C NMR (101 MHz, CDCl<sub>3</sub>)  $\delta$  = 176.4, 137.0, 134.2, 131.2, 129.8, 129.3, 128.2, 125.5, 125.0, 116.5, 52.9, 39.7, 38.5, 24.8, 24.2, 21.1 ppm.

ESI-HRMS calcd for [C<sub>17</sub>H<sub>17</sub>ClO<sub>2</sub>+Na<sup>+</sup>] = 311.0809, 313.0780, found 311.0806, 313.0783.

IR  $\tilde{\nu}$  (cm<sup>-1</sup>) 2950, 1712, 1597, 1433, 1332, 1240, 1076, 794, 735, 693, 575.

**1i: methyl 7-(2-methoxyphenyl)-2,4-dimethylbicyclo[4.1.0]hepta-2,4-diene-7-carboxylate**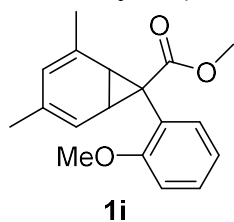

White solid, m.p. 65–68 °C.

<sup>1</sup>H NMR (400 MHz, Chloroform-*d*)  $\delta$  = 7.15 (m, 1H), 6.87 (d,  $J$  = 6.4 Hz, 1H), 6.77 (d,  $J$  = 8.0 Hz, 1H), 6.71 (m, 1H), 5.69 (d,  $J$  = 4.4 Hz, 1H), 5.35 (s, 1H), 3.75 (s, 3H), 3.63 (s, 3H), 2.99 (dd,  $J$  = 8.8, 5.2 Hz, 1H), 2.92 (d,  $J$  = 8.8 Hz, 1H), 2.03 (s, 3H), 1.48 (s, 3H) ppm.

<sup>13</sup>C NMR (101 MHz, CDCl<sub>3</sub>)  $\delta$  = 177.6, 159.1, 134.1, 128.2, 124.4, 121.1, 118.8, 116.8, 110.0, 55.0, 52.7, 39.6, 37.4, 23.6, 22.1, 21.2 ppm.

ESI-HRMS calcd for [C<sub>18</sub>H<sub>20</sub>O<sub>3</sub>+Na<sup>+</sup>] = 307.1305, found 307.1307.

IR  $\tilde{\nu}$  (cm<sup>-1</sup>) 2948, 1708, 1601, 1495, 1434, 1335, 1235, 1161, 1120, 1029, 818, 752, 659, 536.

**1j: ethyl 2,4-dimethyl-7-phenylbicyclo[4.1.0]hepta-2,4-diene-7-carboxylate**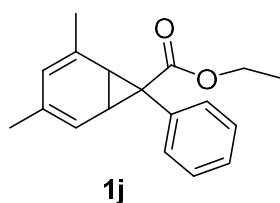

Colorless oil.

<sup>1</sup>H NMR (400 MHz, Chloroform-*d*)  $\delta$  = 7.15 (m, 3H), 7.03 – 6.98 (m, 2H), 5.73 (d,  $J$  = 4.0 Hz, 1H), 5.38 (s, 1H), 4.10 (q,  $J$  = 8.0 Hz, 2H), 3.14 (dd,  $J$  = 8.4, 5.6 Hz, 1H), 3.00 (d,  $J$  = 8.0 Hz, 1H), 2.06 (s, 3H), 1.49 (s, 3H), 1.13 (m, 3H) ppm.

<sup>13</sup>C NMR (101 MHz, CDCl<sub>3</sub>)  $\delta$  = 175.6, 133.1, 132.7, 132.4, 131.4, 125.9, 125.5, 124.3, 116.2, 60.3, 41.5, 39.9, 26.4, 22.8, 20.2, 13.2 ppm.

ESI-HRMS calcd for [C<sub>18</sub>H<sub>20</sub>O<sub>2</sub>+Na<sup>+</sup>] = 305.1512, found 305.1511.

IR  $\tilde{\nu}$  (cm<sup>-1</sup>) 2975, 1704, 1446, 1366, 1333, 1230, 1160, 1070, 1027, 956, 911, 808, 735, 697, 663, 641, 553.

**1k: isopropyl 2,4-dimethyl-7-phenylbicyclo[4.1.0]hepta-2,4-diene-7-carboxylate**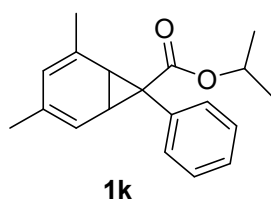

Yellow oil.

<sup>1</sup>H NMR (400 MHz, Chloroform-*d*)  $\delta$  = 7.14 (m, 3H), 7.04 – 6.97 (m, 2H), 5.73 (d,  $J$  = 5.6 Hz, 1H), 5.39 (s, 1H), 4.99 – 4.91 (m, 1H), 3.18 (m, 1H), 3.03 (d,  $J$  = 8.2 Hz, 1H), 2.05 (s, 3H), 1.50 (s, 3H), 1.11 (m, 6H) ppm.

<sup>13</sup>C NMR (101 MHz, CDCl<sub>3</sub>)  $\delta$  = 175.9, 134.1, 133.8, 132.3, 130.0, 129.8, 128.9, 128.5, 127.9, 126.9, 126.4, 125.4, 117.5, 68.5, 42.6, 39.9, 23.9, 21.7, 21.3 ppm.

ESI-HRMS calcd for [C<sub>19</sub>H<sub>22</sub>O<sub>2</sub>+Na<sup>+</sup>] = 305.1512, found 305.1511.

IR  $\tilde{\nu}$  (cm<sup>-1</sup>) 2978, 1701, 1448, 1373, 1241, 1178, 1107, 965, 812, 781, 698, 556.

**1l: benzyl 2,4-dimethyl-7-phenylbicyclo[4.1.0]hepta-2,4-diene-7-carboxylate**

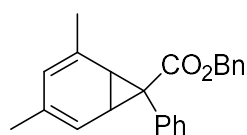

**1l**

Colorless oil.

$^1\text{H NMR}$  (400 MHz, Chloroform-*d*)  $\delta$  = 7.24 (s, 3H), 7.15 (m, 3H), 7.12 – 7.06 (m, 2H), 7.05 – 6.98 (m, 2H), 5.72 (d,  $J$  = 4.0 Hz, 1H), 5.38 (s, 1H), 5.08 (s, 2H), 3.15 (dd,  $J$  = 8.4, 5.6 Hz, 1H), 3.01 (d,  $J$  = 8.0 Hz, 1H), 2.04 (s, 3H), 1.48 (s, 3H) ppm.

$^{13}\text{C NMR}$  (101 MHz,  $\text{CDCl}_3$ )  $\delta$  = 175.4, 135.3, 133.3, 132.7, 132.2, 131.4, 127.3, 126.6, 126.0, 125.9, 125.60, 124.5, 116.1, 65.5, 41.5, 40.0, 26.4, 22.8, 20.2 ppm.

**ESI-HRMS** calcd for  $[\text{C}_{23}\text{H}_{22}\text{O}_2+\text{Na}^+]$  = 353.1512, found 353.1511.

**IR**  $\tilde{\nu}$  ( $\text{cm}^{-1}$ ) 3029, 1706, 1497, 1448, 1375, 1226, 1072, 966, 817, 736, 697, 664, 551.

**1n: methyl 7-(3-fluorophenyl)-2,4-dimethylbicyclo[4.1.0]hepta-2,4-diene-7-carboxylate**

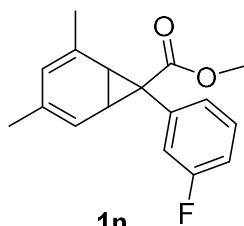

**1n**

White solid, m.p.78–81 °C.

$^1\text{H NMR}$  (400 MHz, Chloroform-*d*)  $\delta$  = 7.12 (m, 1H), 6.85 (m, 1H), 6.78 (d,  $J$  = 8.0 Hz, 1H), 6.71 (m, 1H), 5.72 (d,  $J$  = 5.2 Hz, 1H), 5.41 (s, 1H), 3.63 (s, 3H), 3.13 (dd,  $J$  = 8.4, 5.6 Hz, 1H), 2.98 (d,  $J$  = 8.0 Hz, 1H), 2.05 (s, 3H), 1.51 (s, 3H) ppm.

$^{13}\text{C NMR}$  (101 MHz,  $\text{CDCl}_3$ )  $\delta$  = 176.6, 163.0, 160.5, 135.5 (d,  $J_{\text{C-F}}$  = 8.0 Hz), 134.49, 133.58, 128.3, 128.24 (d,  $J_{\text{C-F}}$  = 8.0 Hz), 125.6, 119.4 (d,  $J_{\text{C-F}}$  = 21.1 Hz), 116.9, 113.67 (d,  $J_{\text{C-F}}$  = 20.9 Hz), 52.9, 42.0, 40.5, 26.6, 23.9, 21.2 ppm.

$^{19}\text{F NMR}$  (377 MHz,  $\text{CDCl}_3$ )  $\delta$  = -114.81 ppm.

**ESI-HRMS** calcd for  $[\text{C}_{17}\text{H}_{17}\text{FO}_2+\text{Na}^+]$  = 295.1110, found 295.1113,

**IR**  $\tilde{\nu}$  ( $\text{cm}^{-1}$ ) 2951, 1712, 1614, 1587, 1490, 1437, 1336, 1242, 1205, 983, 801, 760, 693.

**1o: methyl 7-(3-chlorophenyl)-2,4-dimethylbicyclo[4.1.0]hepta-2,4-diene-7-carboxylate**

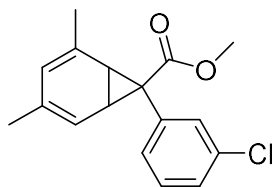

**1o**

White solid, m.p.78–80 °C.

$^1\text{H NMR}$  (400 MHz, Chloroform-*d*)  $\delta$  = 7.17 – 7.05 (m, 2H), 6.98 (s, 1H), 6.91 – 6.84 (m, 1H), 5.73 (d,  $J$  = 5.2 Hz, 1H), 5.41 (s, 1H), 3.64 (s, 3H), 3.11 (dd,  $J$  = 8.8, 5.6 Hz, 1H), 2.96 (d,  $J$  = 8.8 Hz, 1H), 2.05 (s, 3H), 1.51 (s, 3H) ppm.

$^{13}\text{C NMR}$  (101 MHz,  $\text{CDCl}_3$ )  $\delta$  = 176.6, 135.1, 134.6, 133.6, 132.8, 132.4, 130.8, 128.3, 126.9, 125.6, 116.8, 52.9, 41.6, 40.0, 26.4, 23.8, 21.2 ppm.

**ESI-HRMS** calcd for  $[\text{C}_{17}\text{H}_{17}\text{ClO}_2+\text{Na}^+]$  = 311.0809, 313.0780, found 311.0806, 313.0783.

**IR**  $\tilde{\nu}$  ( $\text{cm}^{-1}$ ) 2949, 1709, 1568, 1433, 1332, 1235, 1162, 1075, 1001, 974, 903, 817, 793, 733, 692.

**1p: methyl 7-(3-bromophenyl)-2,4-dimethylbicyclo[4.1.0]hepta-2,4-diene-7-carboxylate**

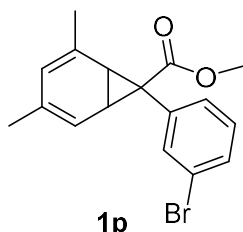

**1p**

White solid, m.p.107–110 °C.

$^1\text{H NMR}$  (400 MHz, Chloroform-*d*)  $\delta$  = 7.31 – 7.26 (m, 1H), 7.13 (m, 1H), 7.04 (m, 1H), 6.93 (d,  $J$  = 8.0 Hz, 1H), 5.73 (d,  $J$  = 5.2 Hz, 1H), 5.41 (s, 1H), 3.64 (s, 3H), 3.10 (dd,  $J$  = 8.4, 5.6 Hz, 1H), 2.96 (d,  $J$  = 8.0 Hz, 1H), 2.05 (s, 3H), 1.52 (s, 3H) ppm.

$^{13}\text{C NMR}$  (101 MHz,  $\text{CDCl}_3$ )  $\delta$  = 176.5, 135.7, 135.3, 134.6, 133.6, 131.3, 129.8, 128.6, 125.6, 120.4, 116.8, 52.9, 41.6, 39.9, 26.3, 23.8, 21.2 ppm.

**ESI-HRMS** calcd for  $[\text{C}_{17}\text{H}_{17}\text{BrO}_2+\text{Na}^+]$  = 355.0304, 356.0338, 357.0284, found 355.0306, 356.0341, 357.0280.

**IR**  $\tilde{\nu}$  ( $\text{cm}^{-1}$ ) 2949, 1711, 1564, 1433, 1332, 1239, 1065, 1000, 819, 792, 719, 692.

**1q: methyl 2,4-diethyl-7-phenylbicyclo[4.1.0]hepta-2,4-diene-7-carboxylate**

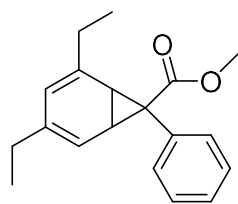

**1q**

Colorless oil.

$^1\text{H NMR}$  (400 MHz, Chloroform-*d*)  $\delta$  = 7.16 – 7.11 (m, 3H), 7.01 (m, 2H), 5.72 (d,  $J$  = 5.4 Hz, 1H), 5.41 (s, 1H), 3.64 (s, 3H), 3.17 (m, 1H), 3.07 (d,  $J$  = 8.6 Hz, 1H), 2.50 – 2.34 (m, 2H), 1.83 (m, 2H), 1.17 (t,  $J$  = 7.6 Hz, 3H), 0.58 (t,  $J$  = 7.6 Hz, 3H) ppm.

$^{13}\text{C NMR}$  (101 MHz,  $\text{CDCl}_3$ )  $\delta$  = 177.3, 140.3, 139.2, 133.1, 132.8, 126.9, 126.6, 122.6, 122.6, 116.4, 116.4, 52.8, 52.8, 41.9, 40.7, 30.4, 28.8, 27.0, 13.0, 12.0 ppm.

**ESI-HRMS** calcd for  $[\text{C}_{19}\text{H}_{22}\text{O}_2+\text{H}^+]$  = 283.1693, found 283.1694.

**IR**  $\tilde{\nu}$  ( $\text{cm}^{-1}$ ) 2963, 1707, 1496, 1432, 1334, 1158, 1029, 923, 826, 735, 698.

**1r: Regio-isomer mixture: methyl 2-ethyl-4-methyl-7-phenylbicyclo[4.1.0]hepta-2,4-diene-7-carboxylate and methyl 4-ethyl-2-methyl-7-phenylbicyclo[4.1.0]hepta-2,4-diene-7-carboxylate**

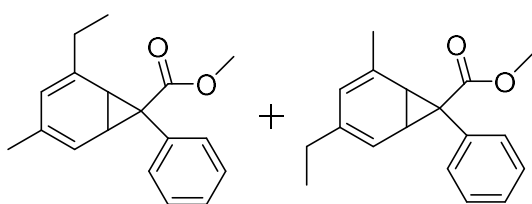

**1r**

White solid, the mixture cannot be separated due to the same  $R_f$  value.

$^1\text{H NMR}$  (400 MHz, Chloroform-*d*)  $\delta$  = 7.20 – 7.12 (m, 3H), 7.06 – 6.96 (m, 2H), 5.73 (m, 1H), 5.42 (s, 0.5 H), 5.37 (s, 0.5 H), 3.63 (d,  $J$  = 1.6 Hz, 3H), 3.15 (m, 1H), 3.07 (d,  $J$  = 8.6 Hz, 0.5 H), 2.98 (d,  $J$  = 8.6 Hz, 0.5 H), 2.51 –

2.30 (m,  $J$  = 7.9 Hz, 1H), 2.09 (s, 1.5 H), 1.89 – 1.74 (m, 1H), 1.51 (s, 1.5 H), 1.15 (t,  $J$  = 7.6 Hz, 1.5 H), 0.58 (t,  $J$  = 7.6 Hz, 1.5 H) ppm.

$^{13}\text{C NMR}$  (101 MHz,  $\text{CDCl}_3$ )  $\delta$  = 177.3, 177.2, 140.3, 139.1, 134.3, 133.8, 133.2, 133.0, 132.7, 132.7, 127.0, 126.9, 126.6, 126.6, 124.6, 124.6, 123.4, 123.4, 117.5, 116.0, 52.8, 52.8, 42.1, 41.7, 41.1, 39.8, 30.2, 28.7, 27.2, 26.7, 24.0, 21.3, 13.0, 12.0 ppm.

**ESI-HRMS** calcd for  $[\text{C}_{18}\text{H}_{20}\text{O}_2+\text{Na}^+]$  = 291.1361, found 291.1363.

### 3. General procedure for the preparation of the racemic products

#### General procedure for the preparation of the racemic tricyclo[3.2.2.0]nonene via Diels-Alder reaction of 4-oxo-4-arylbutenoates

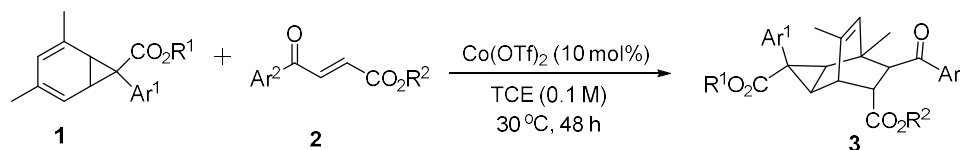

A dry reaction tube was charged with  $\text{Co}(\text{OTf})_2$  (1.8 mg, 10 mol%), norcaradiene **1** (0.10 mmol), (*E*)-4-oxo-4-arylbutenoate **2** (0.05 mmol), followed by adding dry  $\text{CCl}_2\text{HCCl}_2\text{H}$  (1,1,2,2-Tetrachloroethane, TCE, 0.5 mL) under air atmosphere. The mixture was stirred for 48 h at 30 °C. Last, the reaction mixture was subjected to column chromatography on silica gel with eluent (petroleum ether /ethyl acetate = 10:1) to afford the racemic product **3**.

#### For the preparation of the racemic sample of 3ah, 3aj, 3ak, 3aq, 3ba, 3ca, 3da, and 3ea

A dry reaction tube was charged with racemic ligand ( $\pm$ )- $\text{L}_3\text{-PiPr}_2$  (3.3 mg, 10 mol%),  $\text{Co}(\text{OTf})_2$  (1.8 mg, 10 mol%), norcaradiene **1** (0.10 mmol), (*E*)-4-oxo-4-arylbutenoate **2** (0.05 mmol), followed by adding dry  $\text{CCl}_2\text{HCCl}_2\text{H}$  (1,1,2,2-Tetrachloroethane, TCE, 0.5 mL) under  $\text{N}_2$  atmosphere. The mixture was stirred for 48 h at 30 °C. Last, the reaction mixture was subjected to column chromatography on silica gel with eluent (petroleum ether/ethyl acetate = 10:1) to afford the related racemic product **3**.

#### For the preparation of the racemic bicyclo[2,2,2]octene-based dienes **5**

A dry reaction tube was charged with racemic ligand ( $\pm$ )- $\text{L}_3\text{-PiPr}_2$  (6.5 mg, 10 mol%),  $\text{Co}(\text{OTf})_2$  (3.6 mg, 10 mol%), norcaradiene **1** (0.20 mmol),  $\beta$ -nitroenone **4** (0.10 mmol), followed by adding dry  $\text{CH}_2\text{Cl}_2$  (1.0 mL) under  $\text{N}_2$  atmosphere. The mixture was stirred at -10 °C. After reacted for 12 hours, added DBU (0.15 mmol) and continue to react for another 12 hours. Last, the reaction mixture was subjected to column chromatography on silica gel with eluent (petroleum ether /ethyl acetate = 10:1) to afford the corresponding product **5**.

### 4. General procedure for the asymmetric Diels-Alder reaction

#### Experimental procedure for the asymmetric Diels-Alder reaction of 4-oxo-4-arylbutenoates

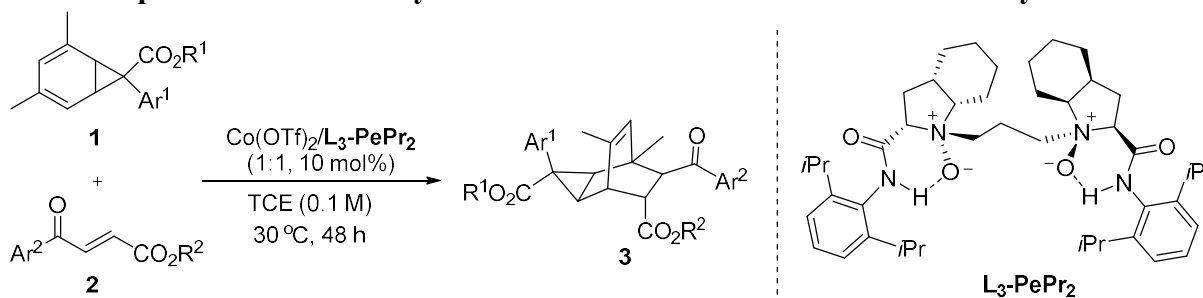

A dry reaction tube was charged with chiral *N,N'*-dioxide ligand  $\text{L}_3\text{-PePr}_2$  (7.3mg, 10 mol%),  $\text{Co}(\text{OTf})_2$  (3.6 mg, 10 mol%), norcaradiene **1** (0.20 mmol), (*E*)-4-oxo-4-arylbutenoate **2** (0.10 mmol), followed by adding  $\text{CCl}_2\text{HCCl}_2\text{H}$  (1.0 mL) under air atmosphere. The mixture was stirred for 48 h at 30 °C. Last, the reaction mixture was subjected to column chromatography on silica gel with eluent (petroleum ether /ethyl acetate = 10:1 ) to afford the corresponding product **3**.

### Experimental procedure for the synthesis of **3aj**

A dry reaction tube was charged with ethyl (*E*)-4-(4-nitrophenyl)-4-oxobut-2-enoate **2j** (0.10 mmol), ligand **L<sub>3</sub>-PePr<sub>2</sub>** (7.3 mg, 10 mol%), Co(OTf)<sub>2</sub> (3.6 mg, 10 mol%), followed by adding dry CH<sub>2</sub>Cl<sub>2</sub> (0.5 mL) under N<sub>2</sub> atmosphere. The CH<sub>2</sub>Cl<sub>2</sub> was removed in vacuo after the mixture was stirred at 30 °C for 0.5 h. Norcaradiene **1a** (0.20 mmol) was added to the reaction tube, followed by the addition of dry CCl<sub>2</sub>HCCl<sub>2</sub>H (1.0 mL) under N<sub>2</sub> atmosphere, and the reaction mixture continued stirring at 30 °C for 72 h. Last, the reaction mixture was subjected to column chromatography on silica gel with eluent (petroleum ether /ethyl acetate = 10:1) to afford the corresponding product **3aj**.

### Experimental procedure for the scale-up synthesis of **3aa**

A dry reaction tube was charged with the ligand **L<sub>3</sub>-PePr<sub>2</sub>** (2.5 mmol, 182.5 mg), Co(OTf)<sub>2</sub> (10 mol%, 89.3 mg), (*E*)-ethyl 4-oxo-4-phenylbutenoate **2a** (2.5 mmol, 510 mg) and the norcaradiene **1a** (5.0 mmol, 1.27 g), followed by adding dry CCl<sub>2</sub>HCCl<sub>2</sub>H (25 mL). The mixture was stirred at 30 °C for 48 hours, and then subjected to column chromatography on silica gel with eluent (petroleum ether /ethyl acetate = 10:1) to afford the product **3aa** (0.92 g, 80% yield, >19:1 dr, 91% ee).

### Experimental procedure for the asymmetric Diels–Alder reaction of β-nitroenones

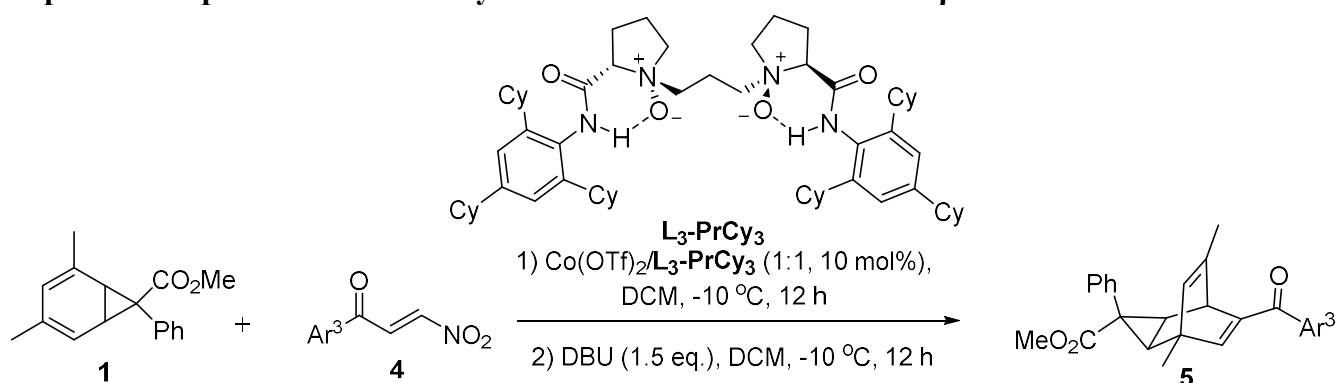

A dry reaction tube was charged with ligand **L<sub>3</sub>-PrCy<sub>3</sub>** (9.5 mg, 10 mol%), Co(OTf)<sub>2</sub> (3.6 mg, 10 mol%), β-nitroenone **4** (0.10 mmol), followed by adding dry CH<sub>2</sub>Cl<sub>2</sub> (0.5 mL) under N<sub>2</sub> atmosphere. The CH<sub>2</sub>Cl<sub>2</sub> was removed in vacuo after the mixture was stirred at 30 °C for 0.5 h. Norcaradiene **1a** (0.20 mmol) was added to the reaction tube, followed by the addition of dry CH<sub>2</sub>Cl<sub>2</sub> (1.0 mL) under N<sub>2</sub> atmosphere, and the reaction mixture continued stirring at -10 °C. After reacted for 12 hours, added DBU (0.15 mmol) and continue to react for another 12 hours. Last, the reaction mixture was subjected to column chromatography on silica gel with eluent (petroleum ether /ethyl acetate = 10:1) to afford the corresponding product **5**.

### Experimental procedure for the further transformations.

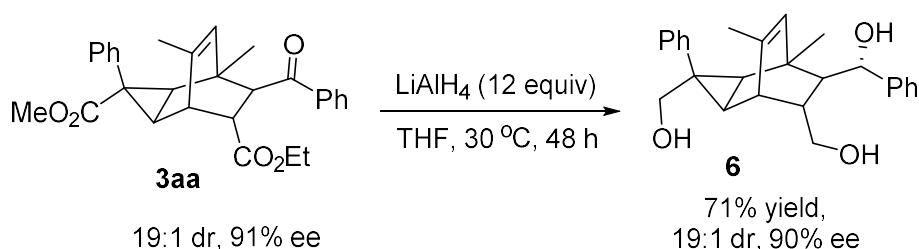

The tricyclo[3.2.2.0]nonene **3aa** (1.0 mmol) was dissolved in the dry THF (1.0 mL) at the nitrogen atmosphere. Then this solution was added slowly to the dry reaction tube charged with LiAlH<sub>4</sub> (12.0 mmol) in the nitrogen atmosphere. The mixture was stirred at 30 °C for 48 hours and the reaction mixture was subjected to column chromatography on silica gel with eluent (petroleum ether /ethyl acetate = 3:1 ) to afford the derivative **6** (27.7mg, 71% yield).

## 5. Optimization of the reaction conditions

Table S1. Effect of the metal salts<sup>a</sup>

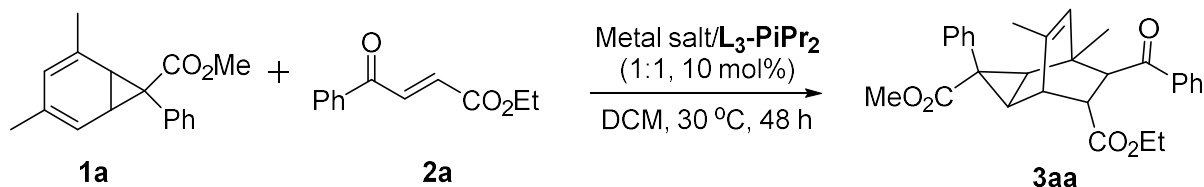

| entry     | Metal salt                 | Yield (%) <sup>b</sup> | dr <sup>c</sup> | ee (%) <sup>d</sup> |
|-----------|----------------------------|------------------------|-----------------|---------------------|
| 1         | La(OTf) <sub>3</sub>       | trace                  | 10:1            | 13/0                |
| 2         | Ce(OTf) <sub>3</sub>       | trace                  | 4:1             | 0/13                |
| 3         | Pr(OTf) <sub>3</sub>       | trace                  | 1:1             | 9/ 25               |
| 4         | Nd(OTf) <sub>3</sub>       | trace                  | 3:2             | 4/7                 |
| 5         | Sm(OTf) <sub>3</sub>       | trace                  | 1:3             | 0/0                 |
| 6         | Eu(OTf) <sub>3</sub>       | trace                  | 1:2             | 0/33                |
| 7         | Gd(OTf) <sub>3</sub>       | trace                  | 1:2             | 9/17                |
| 8         | Tb(OTf) <sub>3</sub>       | trace                  | 4:1             | 9/41                |
| 9         | Dy(OTf) <sub>3</sub>       | trace                  | 7:3             | 13/37               |
| 10        | Ho(OTf) <sub>3</sub>       | trace                  | 4:1             | 15/39               |
| 11        | Er(OTf) <sub>3</sub>       | trace                  | 3:1             | 39/33               |
| 12        | Tm(OTf) <sub>3</sub>       | trace                  | 3:1             | 17/35               |
| 13        | Al(OTf) <sub>3</sub>       | trace                  | 1:1             | 0/0                 |
| 14        | In(OTf) <sub>3</sub>       | trace                  | 1:2             | 0/0                 |
| 15        | Ca(OTf) <sub>2</sub>       | trace                  | 1:1             | 0/0                 |
| 16        | Ba(OTf) <sub>2</sub>       | trace                  | 1:1             | 0/0                 |
| <b>17</b> | <b>Co(OTf)<sub>2</sub></b> | <b>26</b>              | <b>19:1</b>     | <b>35</b>           |
| 18        | Mg(OTf) <sub>2</sub>       | trace                  | -               | -                   |
| 19        | Sc(OTf) <sub>2</sub>       | 27                     | 19:1            | 27                  |
| 20        | Ni(OTf) <sub>2</sub>       | -                      | -               | -                   |
| 21        | Cu(OTf) <sub>2</sub>       | -                      | -               | -                   |
| 22        | Zn(OTf) <sub>2</sub>       | 38                     | 19:1            | 17                  |
| 23        | Fe(OTf) <sub>2</sub>       | -                      | -               | -                   |
| 24        | Fe(OTf) <sub>3</sub>       | -                      | -               | -                   |
| 25        | Y(OTf) <sub>3</sub>        | 5                      | 1:4             | 19/39               |
| 26        | Yb(OTf) <sub>3</sub>       | 30                     | 1:3             | 30/30               |

<sup>a</sup>Unless otherwise noted, all reactions were carried out with **1a** (0.10 mmol), **2a** (0.1 mmol), and metal salt/**L<sub>3</sub>-PiPr<sub>2</sub>** (1:1, 10 mol%) in DCM (1.0 mL) at 30 °C for 24 h. <sup>b</sup>Isolated yield of **3aa**. <sup>c</sup>Determined by <sup>1</sup>H NMR. <sup>d</sup>Determined by HPLC on a chiral stationary phase.

**Table S2. Effect of the Ligand<sup>a</sup>**

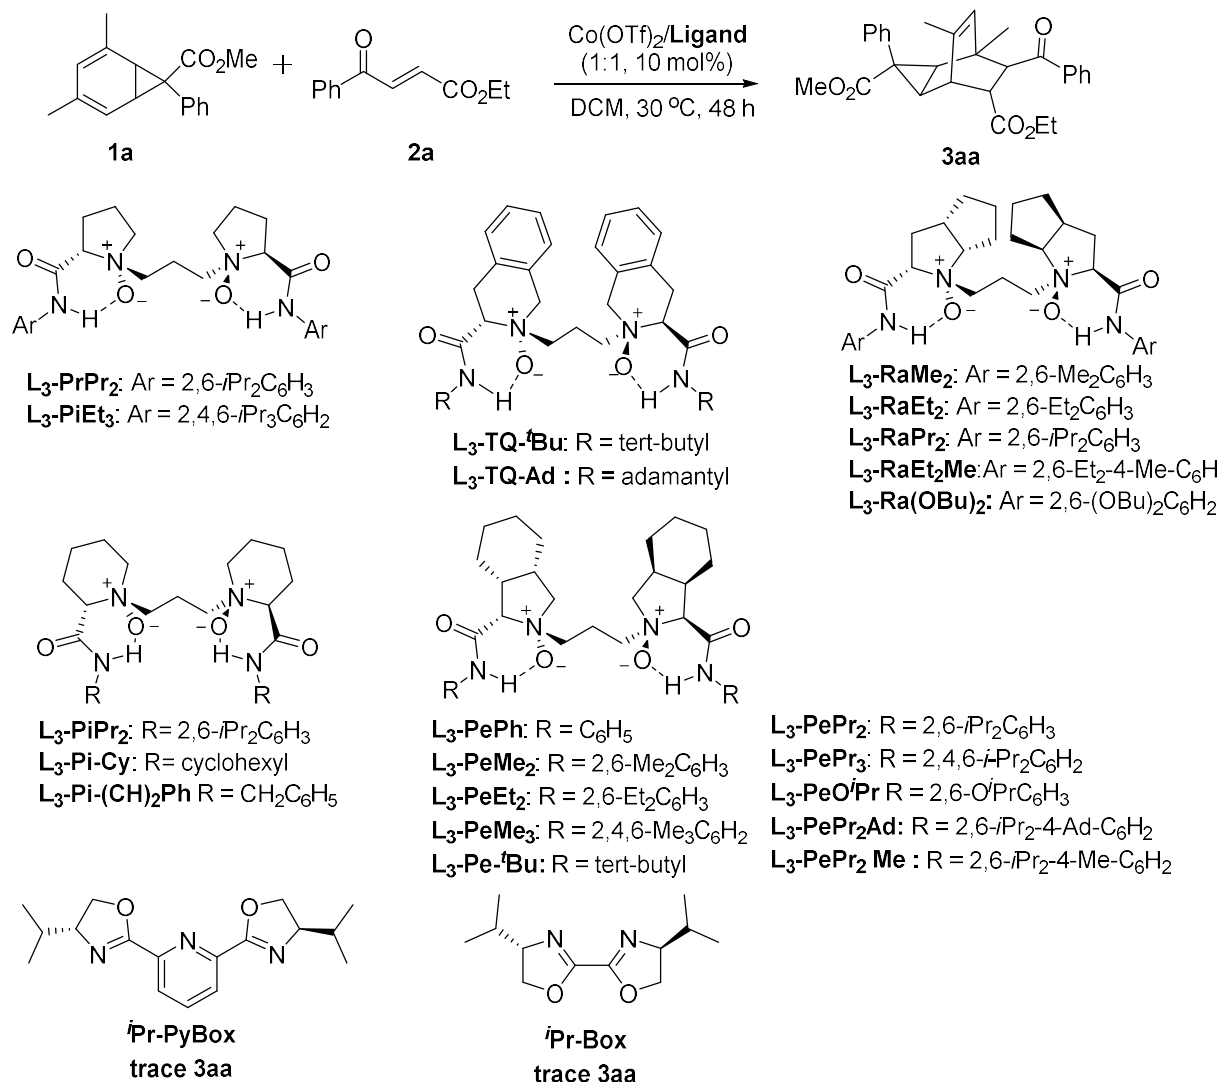

| entry | Ligand                                   | yield (%) <sup>b</sup> | dr <sup>c</sup> | solvent | ee (%) <sup>d</sup> |
|-------|------------------------------------------|------------------------|-----------------|---------|---------------------|
| 1     | <b>L<sub>3</sub>-PrPr<sub>2</sub></b>    | 28                     | 19:1            | DCM     | 65                  |
| 2     | <b>L<sub>3</sub>-PrPr<sub>3</sub></b>    | trace                  | 8:1             | DCM     | 35                  |
| 3     | <b>L<sub>3</sub>-RaMe<sub>2</sub></b>    | 10                     | 4:1             | DCM     | 7/7                 |
| 4     | <b>L<sub>3</sub>-RaEt<sub>2</sub></b>    | 20                     | 19:1            | DCM     | 53                  |
| 5     | <b>L<sub>3</sub>-RaEt<sub>2</sub>Me</b>  | 35                     | 19:1            | DCM     | 61                  |
| 6     | <b>L<sub>3</sub>-Ra(OBu)<sub>2</sub></b> | 20                     | 19:1            | DCM     | 37                  |
| 7     | <b>L<sub>3</sub>-RaPr<sub>2</sub></b>    | 34                     | 19:1            | DCM     | 77                  |
| 8     | <b>L<sub>3</sub>-TQ-<sup>t</sup>Bu</b>   | 26                     | 1:1             | DCM     | 63/33               |
| 9     | <b>L<sub>3</sub>-TQ-Ad</b>               | 20                     | 1:1             | DCM     | 30/30               |
| 10    | <b>L<sub>3</sub>-PiPr<sub>2</sub></b>    | 30                     | 19:1            | DCM     | 69                  |
| 11    | <b>L<sub>3</sub>-Pi-Cy</b>               | trace                  | 1:1             | DCM     | 0/0                 |

|           |                                                      |           |             |            |           |
|-----------|------------------------------------------------------|-----------|-------------|------------|-----------|
| 12        | <b>L<sub>3</sub>-Pi(CH)<sub>2</sub>Ph</b>            | trace     | 1:4         | DCM        | 6         |
| <b>13</b> | <b>L<sub>3</sub>-PePr<sub>2</sub></b>                | <b>35</b> | <b>19:1</b> | <b>DCM</b> | <b>89</b> |
| 14        | <b>L<sub>3</sub>-PePr<sub>3</sub></b>                | trace     | 7:1         | DCM        | 65/7      |
| 15        | <b>L<sub>3</sub>-Pe(O<sup>i</sup>Pr)<sub>2</sub></b> | 35        | 19:1        | DCM        | 75        |
| 16        | <b>L<sub>3</sub>-PePr<sub>2</sub>Ad</b>              | trace     | 9:1         | DCM        | 59/3      |
| 17        | <b>L<sub>3</sub>-PeMe<sub>3</sub></b>                | 24        | 19:1        | DCM        | 33        |
| 18        | <b>L<sub>3</sub>-Pe-<sup>t</sup>Bu</b>               | 22        | 8:1         | DCM        | 79/8      |
| 19        | <b>L<sub>3</sub>-PeNHPh</b>                          | 20        | 7:1         | DCM        | 60        |
| 20        | <b>L<sub>3</sub>-PeEt<sub>2</sub></b>                | 39        | 8:1         | DCM        | 82/0      |
| 21        | <b>L<sub>3</sub>-PeMe<sub>2</sub></b>                | 38        | 9:1         | DCM        | 74/0      |
| 22        | <b>L<sub>3</sub>-TQPr<sub>2</sub></b>                | 13        | 3:1         | DCM        | 0/12      |

<sup>a</sup>Unless otherwise noted, all reactions were carried out with **1a** (0.10 mmol), **2a** (0.1 mmol), and Co(OTf)<sub>2</sub>/**Ligand** (1:1, 10 mol%) in DCM (1.0 mL) at 30 °C for 24 h. <sup>b</sup>Isolated yield of **3aa**. <sup>c</sup>Determined by <sup>1</sup>H NMR. <sup>d</sup>Determined by HPLC on a chiral stationary phase.

**Table S3. Effect of the solvent<sup>a</sup>**

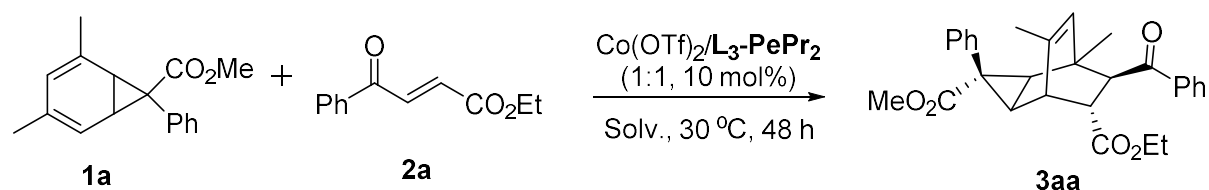

| entry           | Solvent                          | yield (%) <sup>b</sup> | dr <sup>c</sup> | ee (%) <sup>d</sup> |
|-----------------|----------------------------------|------------------------|-----------------|---------------------|
| 1               | Toluene                          | trace                  | -               | -                   |
| 2               | THF                              | trace                  | -               | -                   |
| 3               | CH <sub>3</sub> Cl               | trace                  | -               | -                   |
| 4               | EA                               | trace                  | -               | -                   |
| 5               | MeOH                             | 20                     | 19:1            | -79                 |
| 6               | MeCN                             | trace                  | -               | -                   |
| 7               | Et <sub>2</sub> O                | trace                  | -               | -                   |
| 8               | DCM                              | 30                     | 19:1            | 89                  |
| 9               | DCE                              | 8                      | 9:1             | 73                  |
| <b>10</b>       | <b>1,1,2,2-Tetrachloroethane</b> | <b>32</b>              | <b>19:1</b>     | <b>92</b>           |
| 11              | 1,1,2-Trichloroethane            | 30                     | 19:1            | 91                  |
| 12              | dichlorobenzene                  | 10                     | 19:1            | 90                  |
| 13 <sup>e</sup> | 1,1,2-Trichloroethane            | 49                     | 19:1            | 91                  |
| 14 <sup>e</sup> | 1,1,2,2-Tetrachloroethane        | 67                     | 19:1            | 91                  |
| 15 <sup>e</sup> | 1-Bromo-3-chloropropane          | 66                     | 19:1            | 91                  |
| 16 <sup>e</sup> | 1,2-Dichlorobutane               | 12                     | 19:1            | 91                  |
| 17 <sup>e</sup> | 1,2-Dibromobutane                | 15                     | 19:1            | 91                  |
| 18 <sup>e</sup> | 1,1,2,2-Tetrabromoethane         | -                      | -               | -                   |
| 19 <sup>e</sup> | 1,4-Dichlorobutane               | 57                     | 19:1            | 91                  |
| 20 <sup>f</sup> | 1,1,2,2-Tetrachloroethane        | 61                     | 19:1            | 88                  |



|                         |                                  |           |             |           |
|-------------------------|----------------------------------|-----------|-------------|-----------|
| <b>21<sup>e,g</sup></b> | <b>1,1,2,2-Tetrachloroethane</b> | <b>92</b> | <b>19:1</b> | <b>91</b> |
| 22 <sup>e,g</sup>       | 1-Bromo-3-chloropropane          | 90        | 19:1        | 90        |
| 23 <sup>e,g</sup>       | 1,1,2,2-Tetrachloroethane        | 92        | 19:1        | 89        |
| 24 <sup>e,h</sup>       | 1,1,2,2-Tetrachloroethane        | trace     | -           | -         |
| 25 <sup>e,i</sup>       | 1,1,2,2-Tetrachloroethane        | trace     | -           | -         |
| 26 <sup>e,g</sup>       | 1,1,2,2-Tetrachloroethane        | 20        | 3:1         | 0/12      |

<sup>a</sup>Unless otherwise noted, all reactions were carried out with **1a** (0.10 mmol), **2a** (0.1 mmol), and Co(OTf)<sub>2</sub>/L<sub>3</sub>-PePr<sub>2</sub> (1:1, 10 mol%) in solvent (1.0 mL) at 30 °C for 24 h. <sup>b</sup>Isolated yield of **3aa**. <sup>c</sup>Determined by <sup>1</sup>H NMR. <sup>d</sup>Determined by HPLC on a chiral stationary phase. <sup>e</sup>**1a** was 0.2 mmol. <sup>f</sup>72 h. <sup>g</sup>48 h. <sup>h</sup>Co(OTf)<sub>2</sub>/<sup>i</sup>Pr-PyBox. <sup>i</sup>Co(OTf)<sub>2</sub>/<sup>i</sup>Pr-Box. <sup>g</sup>Co(OTf)<sub>2</sub>/L<sub>3</sub>-TQPr<sub>2</sub>.

**Table S4. Effect of the temperature<sup>a</sup>**

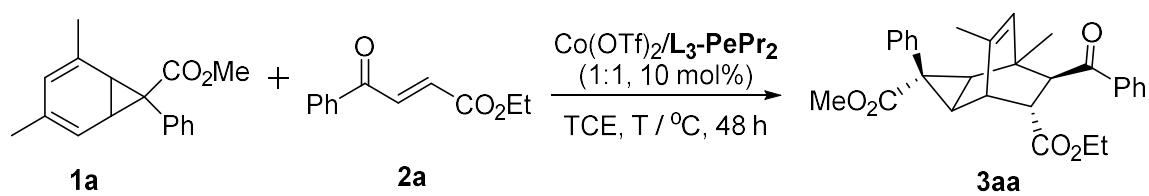

| entry          | <i>T</i> °C | yield (%) <sup>b</sup> | dr <sup>c</sup> | ee (%) <sup>d</sup> |
|----------------|-------------|------------------------|-----------------|---------------------|
| 1              | 40          | 94                     | 19:1            | 83                  |
| 2              | 35          | 69                     | 19:1            | 86                  |
| <b>3</b>       | <b>30</b>   | <b>92</b>              | <b>19:1</b>     | <b>91</b>           |
| 4 <sup>e</sup> | 25          | 80                     | 19:1            | 89                  |
| 5              | 20          | 65                     | 19:1            | 91                  |
| 6 <sup>e</sup> | 20          | 71                     | 19:1            | 91                  |
| 7              | 10          | 30                     | 19:1            | 93                  |
| 8              | 0           | 13                     | 19:1            | 92                  |
| 9              | -10         | trace                  | 19:1            | 91                  |

<sup>a</sup>Unless otherwise noted, all reactions were carried out with **1a** (0.20 mmol), **2a** (0.1 mmol), and Co(OTf)<sub>2</sub>/L<sub>3</sub>-PePr<sub>2</sub> (1:1, 10 mol%) in TCE (1.0 mL) at the set temperature for 24 h. <sup>b</sup>Isolated yield of **3aa**. <sup>c</sup>Determined by <sup>1</sup>H NMR. <sup>d</sup>Determined by HPLC on a chiral stationary phase. <sup>e</sup>72 h.

**Table S5. Effect of the counterions of metal salts<sup>a</sup>**

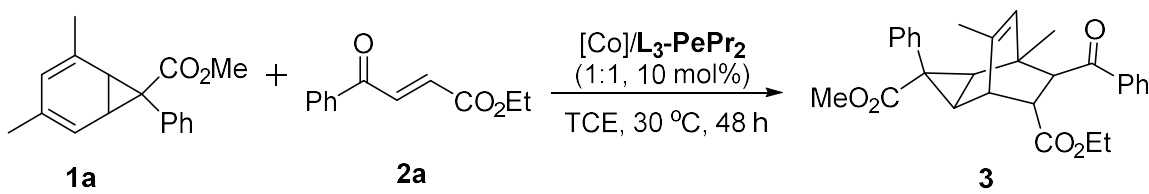

| entry <sup>[a]</sup> | [Co]                                                  | yield (%) <sup>b</sup> | dr <sup>c</sup> | ee (%) <sup>d</sup> |
|----------------------|-------------------------------------------------------|------------------------|-----------------|---------------------|
| 1                    | CoCl <sub>2</sub>                                     | Trace                  | -               | -                   |
| 2                    | Co(NTf <sub>2</sub> ) <sub>2</sub>                    | 60                     | 19:1            | 89                  |
| 3                    | Co(ClO <sub>4</sub> ) <sub>2</sub> ·6H <sub>2</sub> O | 46                     | 19:1            | 88                  |

|   |                                                      |    |      |       |
|---|------------------------------------------------------|----|------|-------|
| 4 | Co(BF <sub>4</sub> ) <sub>2</sub> ·6H <sub>2</sub> O | 40 | 3:7  | 10/65 |
| 5 | Co(OTf) <sub>2</sub>                                 | 92 | 19:1 | 91    |

<sup>a</sup>Unless otherwise noted, all reactions were carried out with **1a** (0.20 mmol), **2a** (0.1 mmol), and Metal salt/L<sub>3</sub>-PePr<sub>2</sub> (1:1, 10 mol%) in TCE (1.0 mL) at 30 °C for 24 h. <sup>b</sup>Isolated yield of **3aa**. <sup>c</sup>Determined by <sup>1</sup>H NMR. <sup>d</sup>Determined by HPLC on a chiral stationary phase.

**Table S6. Additive effect<sup>a</sup>**

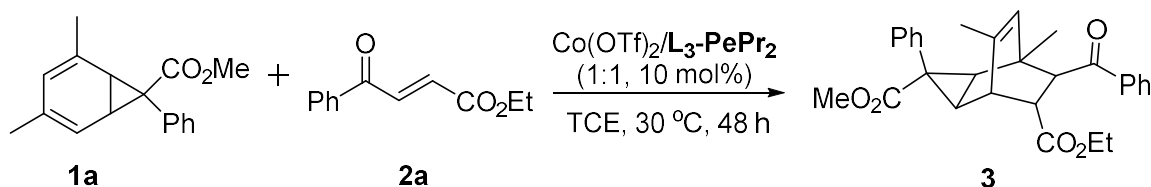

| entry <sup>[a]</sup> | additives                      | yield (%) <sup>b</sup> | dr <sup>c</sup> | ee (%) <sup>d</sup> |
|----------------------|--------------------------------|------------------------|-----------------|---------------------|
| 1                    | 3 Å MS (20 mg)                 | Trace                  | 1:1             | 3/30                |
| 2                    | 4 Å MS (20 mg)                 | Trace                  | 1:3             | 15/53               |
| 3                    | 5 Å MS (20 mg)                 | Trace                  | 1:2             | 0/53                |
| 4                    | LiNTf (10 mol %)               | 68                     | 19:1            | 90                  |
| 5                    | LiNTf (20 mol %)               | 85                     | 19:1            | 89                  |
| 6                    | LiNTf (30 mol %)               | 87                     | 19:1            | 85                  |
| 7                    | NaBARF <sub>4</sub> (10 mol %) | 60                     | 19:1            | 90                  |
| 8                    | NaBARF <sub>4</sub> (20 mol %) | 83                     | 19:1            | 87                  |
| 9                    | NaBARF <sub>4</sub> (30 mol %) | 80                     | 19:1            | 87                  |
| <b>10</b>            | -                              | <b>92</b>              | <b>19:1</b>     | <b>91</b>           |
| 11                   | H <sub>2</sub> O (1 μL)        | 32                     | 9:1             | 86                  |
| 12                   | H <sub>2</sub> O (2 μL)        | 32                     | 9:1             | 86                  |
| 13                   | H <sub>2</sub> O (5 μL)        | 32                     | 9:1             | 86                  |
| 14                   | H <sub>2</sub> O (10 μL)       | Trace                  | -               | -                   |

<sup>a</sup>Unless otherwise noted, all reactions were carried out with **1a** (0.20 mmol), **2a** (0.1 mmol), Co(OTf)<sub>2</sub>/L<sub>3</sub>-PePr<sub>2</sub> (1:1, 10 mol%), and additives in TCE (1.0 mL) at 30 °C for 24 h. <sup>b</sup>Isolated yield of **3aa**. <sup>c</sup>Determined by <sup>1</sup>H NMR. <sup>d</sup>Determined by HPLC on a chiral stationary phase.

## 6. Optimization of the reaction conditions for β-nitroenone

**Table S7. Effect of the metal salts<sup>a</sup>**

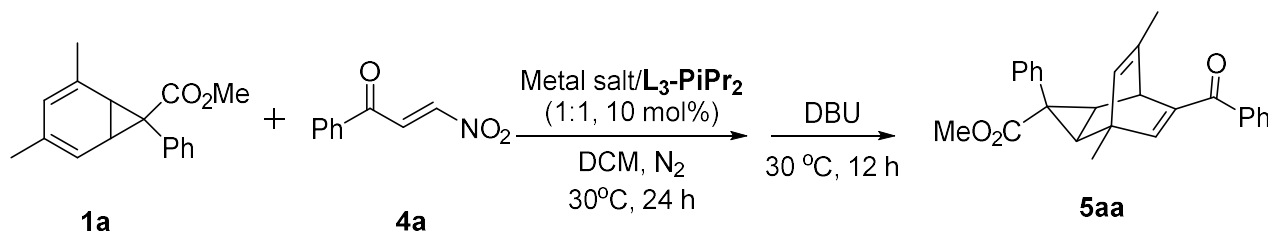

| entry    | metal salt                 | yield (%) <sup>b</sup> | dr <sup>c</sup> | ee <sup>d</sup> |
|----------|----------------------------|------------------------|-----------------|-----------------|
| <b>1</b> | <b>Co(OTf)<sub>2</sub></b> | <b>94</b>              | <b>19:1</b>     | <b>4</b>        |
| 2        | La(OTf) <sub>3</sub>       | 50                     | 10:1            | 0               |

|    |                      |    |      |   |
|----|----------------------|----|------|---|
| 3  | Ce(OTf) <sub>3</sub> | 42 | 12:1 | 0 |
| 4  | Pr(OTf) <sub>3</sub> | 34 | 19:1 | 4 |
| 5  | Nd(OTf) <sub>3</sub> | 56 | 10:1 | 5 |
| 6  | Sm(OTf) <sub>3</sub> | 34 | 10:1 | - |
| 7  | Eu(OTf) <sub>3</sub> | 46 | 4:1  | 0 |
| 8  | Gd(OTf) <sub>3</sub> | 66 | 5:1  | 0 |
| 9  | Tb(OTf) <sub>3</sub> | 66 | 10:1 | 6 |
| 10 | Dy(OTf) <sub>3</sub> | 94 | 19:1 | 4 |
| 11 | Ho(OTf) <sub>3</sub> | 50 | 10:1 | 0 |
| 12 | Er(OTf) <sub>3</sub> | 42 | 12:1 | 0 |
| 13 | Tm(OTf) <sub>3</sub> | 34 | 10:1 | 4 |
| 14 | Al(OTf) <sub>3</sub> | -  | -    | - |
| 15 | In(OTf) <sub>3</sub> | -  | -    | - |
| 16 | Ca(OTf) <sub>2</sub> | 46 | 1:1  | 0 |
| 17 | Ba(OTf) <sub>2</sub> | 66 | 3:1  | 0 |

<sup>a</sup>Unless otherwise noted, all reactions were carried out with **1a** (0.10 mmol), **2a** (0.1 mmol), and metal salt/**L**<sub>3</sub>-**PiPr**<sub>2</sub> (1:1, 10 mol%) in DCM (1.0 mL) under nitrogen at 30 °C. After reacted for 24 h, added DBU (0.15 mmol) and continue to react for another 12 hours. <sup>b</sup>Isolated yield of **5aa**. <sup>c</sup>Determined by <sup>1</sup>H NMR. <sup>d</sup>Determined by HPLC on a chiral stationary phase.

**Table S8. Effect of the solvent<sup>a</sup>**

| entry    | solvent                 | yield (%) <sup>b</sup> | dr <sup>c</sup> | ee <sup>d</sup> |
|----------|-------------------------|------------------------|-----------------|-----------------|
| <b>1</b> | <b>DCM</b>              | <b>95</b>              | <b>19:1</b>     | <b>4</b>        |
| 2        | THF                     | 20                     | 1:1             | 0               |
| 3        | Et <sub>2</sub> O       | 60                     | 1:1             | 0               |
| 4        | Toluene                 | 41                     | 4:1             | 11              |
| 5        | EA                      | 38                     | 3:2             | 4               |
| 6        | MeOH                    | N.R.                   | -               | -               |
| 7        | CH <sub>3</sub> CN      | 99                     | 19:1            | 0               |
| 8        | Acetone                 | trace                  | -               | -               |
| 9        | DCE                     | 60                     | 1:1             | 0               |
| 10       | TCE                     | 90                     | 19:1            | 0               |
| 11       | TeCA                    | 93                     | 19:1            | 0               |
| 12       | 1-Bromo-3-chloropropane | 86                     | 5:1             | 4               |
| 13       | dichlorobenzene         | trace                  | 3:2             | -               |

<sup>a</sup>Unless otherwise noted, all reactions were carried out with **1a** (0.10 mmol), **2a** (0.1 mmol), and Co(OTf)<sub>2</sub>/L<sub>3</sub>-PiPr<sub>2</sub> (1:1, 10 mol%) in solvent (1.0 mL) under nitrogen at 30 °C. After reacted for 24 h, added DBU (0.15 mmol) and continue to react for another 12 hours. <sup>b</sup>Isolated yield of **5aa**. <sup>c</sup>Determined by <sup>1</sup>H NMR. <sup>d</sup>Determined by HPLC on a chiral stationary phase.

**Table S9. Effect of the temperature<sup>a</sup>**

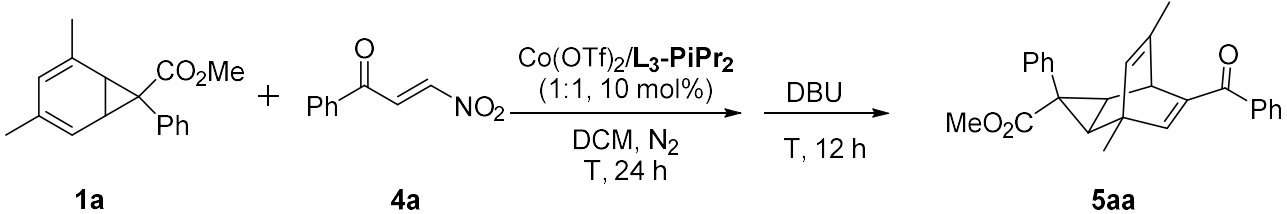

| entry    | <i>T</i> °C | yield (%) <sup>b</sup> | dr <sup>c</sup> | ee <sup>d</sup> |
|----------|-------------|------------------------|-----------------|-----------------|
| 1        | 30          | 94                     | 19:1            | 4               |
| 2        | 20          | 93                     | 19:1            | 8               |
| 3        | 10          | 93                     | 19:1            | 7               |
| 4        | 0           | 87                     | 19:1            | 15              |
| <b>5</b> | <b>-10</b>  | <b>87</b>              | <b>19:1</b>     | <b>20</b>       |
| 6        | -20         | 53                     | 19:1            | 25              |
| 7        | -30         | 44                     | 19:1            | 30              |
| 8        | -40         | 28                     | 19:1            | 35              |

Unless otherwise noted, all reactions were carried out with **1a** (0.10 mmol), **2a** (0.1 mmol), and Co(OTf)<sub>2</sub>/L<sub>3</sub>-PiPr<sub>2</sub> (1:1, 10 mol%) in DCM (1.0 mL) under nitrogen at the set temperature. After reacted for 24 h, added DBU (0.15 mmol) and continue to react for another 12 hours. <sup>b</sup>Isolated yield of **5aa**. <sup>c</sup>Determined by <sup>1</sup>H NMR. <sup>d</sup>Determined by HPLC on a chiral stationary phase.

**Table S10. Effect of the Ligands<sup>a</sup>**

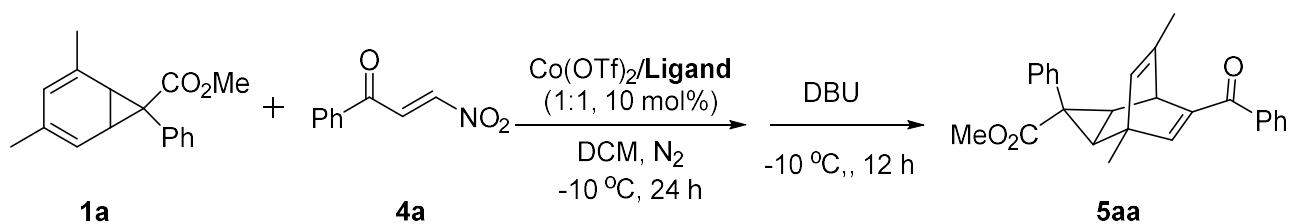

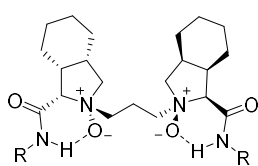

**L<sub>3</sub>-PePr<sub>2</sub>**: R = 2,6-*i*-Pr<sub>2</sub>C<sub>6</sub>H<sub>3</sub>

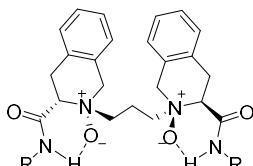

**L<sub>3</sub>-TQ-<sup>t</sup>Bu**: R = tert-butyl  
**L<sub>3</sub>-TQ-Cy**: R = cyclohexyl

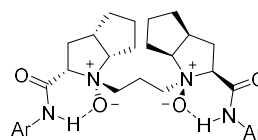

**L<sub>3</sub>-RaPr<sub>2</sub>**: Ar = 2,6-*i*-Pr<sub>2</sub>C<sub>6</sub>H<sub>3</sub>

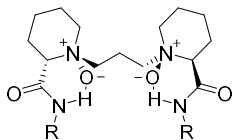

**L<sub>3</sub>-PiMe<sub>2</sub>**: R = 2,6-Me<sub>2</sub>C<sub>6</sub>H<sub>3</sub>  
**L<sub>3</sub>-PiEt<sub>2</sub>**: R = 2,6-Et<sub>2</sub>C<sub>6</sub>H<sub>3</sub>  
**L<sub>3</sub>-PiPr<sub>2</sub>**: R = 2,6-*i*-Pr<sub>2</sub>C<sub>6</sub>H<sub>3</sub>  
**L<sub>3</sub>-Pi(OMe)<sub>2</sub>**: R = 2,6-Me<sub>2</sub>C<sub>6</sub>H<sub>3</sub>  
**L<sub>3</sub>-PiEt<sub>3</sub>**: R = 2,4,6-Et<sub>3</sub>C<sub>6</sub>H<sub>2</sub>  
**L<sub>3</sub>-PiPr<sub>2</sub>**: R = 2,6-*i*-Pr<sub>2</sub>C<sub>6</sub>H<sub>3</sub>  
**L<sub>3</sub>-Pi-<sup>t</sup>Bu**: R = 5-<sup>t</sup>Bu-C<sub>6</sub>H<sub>4</sub>  
**L<sub>3</sub>-PiMe<sub>2</sub><sup>t</sup>Bu**: R = 2,6-Me-4-<sup>t</sup>Bu-C<sub>6</sub>H<sub>2</sub>

**L<sub>3</sub>-PiCHPh<sub>2</sub>**: R = CH<sub>2</sub>-C<sub>6</sub>H<sub>5</sub>  
**L<sub>3</sub>-(CH<sub>2</sub>)<sub>2</sub>-Ph**: R = (CH<sub>2</sub>)<sub>2</sub>-C<sub>6</sub>H<sub>5</sub>  
**L<sub>3</sub>-(CH<sub>2</sub>)<sub>3</sub>-Ph**: R = (CH<sub>2</sub>)<sub>3</sub>-C<sub>6</sub>H<sub>5</sub>  
**L<sub>3</sub>-Pi-Cy**: R = cyclohexyl  
**L<sub>3</sub>-PiAd**: R = adamantyl  
**L<sub>3</sub>-Pi-(1-Ad)Ph**: R = 1-Ad-C<sub>6</sub>H<sub>4</sub>  
**L<sub>3</sub>-PiNaPhth**: R = NaPhth

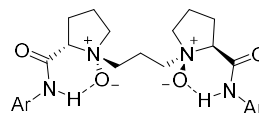

**L<sub>3</sub>-PrMe<sub>2</sub>**: R = 2,6-Me<sub>2</sub>C<sub>6</sub>H<sub>3</sub>  
**L<sub>3</sub>-PrEt<sub>2</sub>**: R = 2,6-Et<sub>2</sub>C<sub>6</sub>H<sub>3</sub>  
**L<sub>3</sub>-PrPr<sub>2</sub>**: R = 2,6-*i*-Pr<sub>2</sub>C<sub>6</sub>H<sub>3</sub>  
**L<sub>3</sub>-Pr(OMe)<sub>2</sub>**: R = 2,6-Me<sub>2</sub>C<sub>6</sub>H<sub>3</sub>  
**L<sub>3</sub>-PrEt<sub>3</sub>**: R = 2,4,6-Et<sub>3</sub>C<sub>6</sub>H<sub>2</sub>  
**L<sub>3</sub>-PrPr<sub>3</sub>**: R = 2,4,6-*i*-Pr<sub>2</sub>C<sub>6</sub>H<sub>2</sub>  
**L<sub>3</sub>-PrCy<sub>3</sub>**: R = 2,4,6-Cy<sub>3</sub>C<sub>6</sub>H<sub>2</sub>  
**L<sub>3</sub>-PrMe<sub>2</sub>tBu**: R = 2,6-Me-4-<sup>t</sup>Bu-C<sub>6</sub>H<sub>2</sub>  
**L<sub>3</sub>-PrEt<sub>2</sub>Ad**: R = 2,6-Et<sub>2</sub>-4-Ad-C<sub>6</sub>H<sub>2</sub>  
**L<sub>3</sub>-PrEt<sub>2</sub>CPh<sub>3</sub>**: R = 2,6-Et<sub>2</sub>-4-(CPh<sub>3</sub>)-C<sub>6</sub>H<sub>2</sub>  
**L<sub>3</sub>-Pr(1-<sup>t</sup>Bu)Ph**: R = 1-<sup>t</sup>Bu-C<sub>6</sub>H<sub>4</sub>  
**L<sub>3</sub>-PrCPh<sub>3</sub>**: R = C(C<sub>6</sub>H<sub>5</sub>)<sub>3</sub>  
**L<sub>3</sub>-PrCHPh<sub>2</sub>**: R = CH<sub>2</sub>-C<sub>6</sub>H<sub>5</sub>

| entry | Ligand                                                 | yield (%) <sup>b</sup> | dr <sup>c</sup> | ee <sup>d</sup> |
|-------|--------------------------------------------------------|------------------------|-----------------|-----------------|
| 1     | <b>L<sub>3</sub>-PiPr<sub>2</sub></b>                  | 53                     | 19:1            | 25              |
| 2     | <b>L<sub>3</sub>-PrPr<sub>2</sub></b>                  | 56                     | 19:1            | 5               |
| 3     | <b>L<sub>3</sub>-RaPr<sub>2</sub></b>                  | 35                     | 12:1            | 0               |
| 4     | <b>L<sub>3</sub>-PePr<sub>2</sub></b>                  | 78                     | 19:1            | 0               |
| 5     | <b>L<sub>3</sub>-TQ-<sup>t</sup>Bu</b>                 | 77                     | 5:1             | 0               |
| 6     | <b>L<sub>3</sub>-TQ-Cy</b>                             | 78                     | 5:1             | 0               |
| 7     | <b>L<sub>3</sub>-PiMe<sub>2</sub></b>                  | 50                     | 19:1            | 3               |
| 8     | <b>L<sub>3</sub>-PiEt<sub>2</sub></b>                  | 67                     | 19:1            | 4               |
| 9     | <b>L<sub>3</sub>-PiPr<sub>2</sub></b>                  | 53                     | 19:1            | 20              |
| 10    | <b>L<sub>3</sub>-Pi(OMe)<sub>2</sub></b>               | 34                     | 19:1            | 4               |
| 11    | <b>L<sub>3</sub>-PiEt<sub>3</sub></b>                  | 81                     | 19:1            | 13              |
| 12    | <b>L<sub>3</sub>-PiPr<sub>3</sub></b>                  | 70                     | 19:1            | 40              |
| 13    | <b>L<sub>3</sub>-Pi-<sup>t</sup>Bu</b>                 | 87                     | 19:1            | 10              |
| 14    | <b>L<sub>3</sub>-PiMe<sub>2</sub><sup>t</sup>Bu</b>    | 30                     | 19:1            | 12              |
| 15    | <b>L<sub>3</sub>-PiCH<sub>2</sub>Ph<sub>2</sub></b>    | 12                     | 19:1            | 9               |
| 16    | <b>L<sub>3</sub>-PiBn</b>                              | 60                     | 19:1            | 12              |
| 17    | <b>L<sub>3</sub>-Pi(CH<sub>2</sub>)<sub>3</sub>-Ph</b> | 45                     | 19:1            | 4               |

|           |                                              |           |             |           |
|-----------|----------------------------------------------|-----------|-------------|-----------|
| 18        | $L_3$ -PiCy                                  | 56        | 19:1        | 14        |
| 19        | $L_3$ -PiAd                                  | 93        | 19:1        | 5         |
| 20        | $L_3$ -Pi-(1-Ad)Ph                           | 65        | 19:1        | 0         |
| 21        | $L_3$ -Pi-(CH <sub>2</sub> ) <sub>2</sub> Ph | 45        | 19:1        | 0         |
| 22        | $L_3$ -PiNaPhth                              | complex   | -           | -         |
| 23        | $L_3$ -PrMe <sub>2</sub>                     | 76        | 19:1        | 0         |
| 24        | $L_3$ -PrEt <sub>2</sub>                     | 65        | 19:1        | 0         |
| 25        | $L_3$ -PrPr <sub>2</sub>                     | 53        | 19:1        | 5         |
| 26        | $L_3$ -Pr(OMe) <sub>2</sub>                  | 50        | 19:1        | 4         |
| 27        | $L_3$ -PrEt <sub>3</sub>                     | 80        | 19:1        | 11        |
| 28        | $L_3$ -PrPr <sub>3</sub>                     | 36        | 19:1        | 5         |
| <b>29</b> | <b><math>L_3</math>-PrCy<sub>3</sub></b>     | <b>48</b> | <b>19:1</b> | <b>80</b> |
| 30        | $L_3$ -PrMe <sub>2</sub> <sup>t</sup> Bu     | 34        | 19:1        | 8         |
| 31        | $L_3$ -PrEt <sub>2</sub> Ad                  | 82        | 19:1        | 20        |
| 32        | $L_3$ -PrEt <sub>2</sub> CPh <sub>3</sub>    | 16        | 19:1        | 10        |
| 33        | $L_3$ -Pr(1- <sup>t</sup> Bu)Ph              | 20        | 19:1        | 0         |
| 34        | $L_3$ -PrCPh <sub>3</sub>                    | 75        | 19:1        | 0         |
| 35        | $L_3$ -PrCHPh <sub>2</sub>                   | 12        | 19:1        | 0         |

Unless otherwise noted, all reactions were carried out with **1a** (0.10 mmol), **2a** (0.1 mmol), and Co(OTf)<sub>2</sub>/Ligand (1:1, 10 mol%) in DCM (1.0 mL) under nitrogen at -10°C. After reacted for 24 h, added DBU (0.15 mmol) and continue to react for another 12 hours. <sup>b</sup>Isolated yield of **5aa**. <sup>c</sup>Determined by <sup>1</sup>H NMR. <sup>d</sup>Determined by HPLC on a chiral stationary phase.

**Table S11. Effect of the reaction time<sup>a</sup>**

| entry | t / h | yield (%) <sup>b</sup> | dr <sup>c</sup> | ee <sup>d</sup> |
|-------|-------|------------------------|-----------------|-----------------|
| 1     | 2     | 20                     | 19:1            | 83              |
| 2     | 4     | 35                     | 19:1            | 82              |

|                      |           |           |             |           |
|----------------------|-----------|-----------|-------------|-----------|
| 3                    | 6         | 33        | 19:1        | 82        |
| 4                    | 8         | 40        | 19:1        | 82        |
| 5                    | 10        | 44        | 19:1        | 81        |
| <b>6</b>             | <b>12</b> | <b>48</b> | <b>19:1</b> | <b>81</b> |
| <b>7<sup>e</sup></b> | <b>12</b> | <b>84</b> | <b>19:1</b> | <b>80</b> |
| 8                    | 14        | 53        | 19:1        | 76        |

Unless otherwise noted, all reactions were carried out with **1a** (0.10 mmol), **2a** (0.1 mmol), and Co(OTf)<sub>2</sub>/L<sub>3</sub>-PrCy<sub>3</sub> (1:1, 10 mol%) in DCM (1.0 mL) under nitrogen at -10°C. After reacted for the set time, added DBU (0.15 mmol) and continue to react for another 12 hours. <sup>b</sup>Isolated yield of **5aa**. <sup>c</sup>Determined by <sup>1</sup>H NMR. <sup>d</sup>Determined by HPLC on a chiral stationary phase. <sup>e</sup>**1a** was 0.2 mmol.

**Table S12. Additive effect<sup>a</sup>**

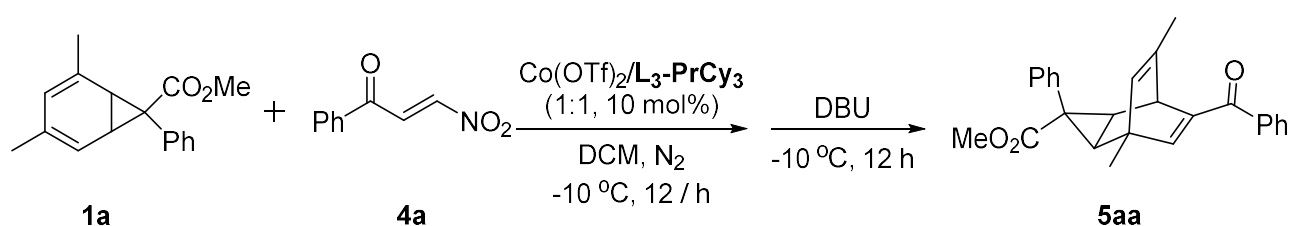

| entry <sup>[a]</sup> | additives                      | yield (%) <sup>b</sup> | dr <sup>c</sup> | ee (%) <sup>d</sup> |
|----------------------|--------------------------------|------------------------|-----------------|---------------------|
| 1                    | 3 Å MS (20 mg)                 | Trace                  | N.D             | N.D                 |
| 2                    | 4 Å MS (20 mg)                 | Trace                  | N.D             | N.D                 |
| 3                    | 5 Å MS (20 mg)                 | Trace                  | N.D             | N.D                 |
| 4                    | LiNTf <sub>2</sub>             | 75                     | 19:1            | 78                  |
| 7                    | NaBARF <sub>4</sub> (10 mol %) | 20                     | 19:1            | 55                  |
| 11                   | H <sub>2</sub> O (1 μL)        | 67                     | 19:1            | 75                  |
| 12                   | H <sub>2</sub> O (10 μL)       | 55                     | 19:1            | 60                  |

Unless otherwise noted, all reactions were carried out with **1a** (0.20 mmol), **2a** (0.1 mmol), additive and Co(OTf)<sub>2</sub>/L<sub>3</sub>-PrCy<sub>3</sub> (1:1, 10 mol%) in DCM (1.0 mL) under nitrogen at -10°C. After reacted for 12 hours, added DBU (0.15 mmol) and continue to react for another 12 hours. <sup>b</sup>Isolated yield of **5aa**. <sup>c</sup>Determined by <sup>1</sup>H NMR. <sup>d</sup>Determined by HPLC on a chiral stationary phase.

**Table S13. Effect of the counterions of metal salts<sup>a</sup>**

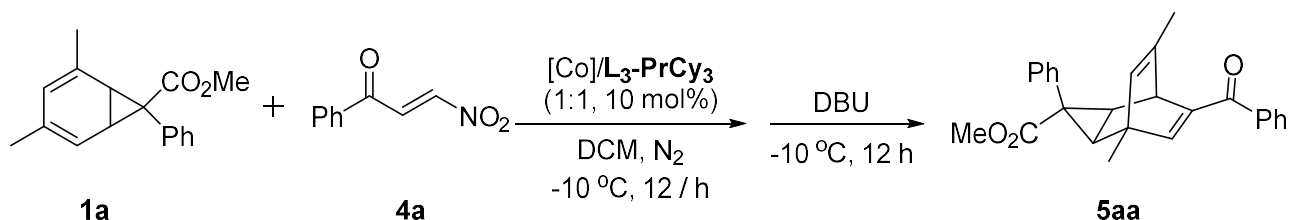

| entry <sup>[a]</sup> | [Co]                                                  | yield (%) <sup>b</sup> | dr <sup>c</sup> | ee (%) <sup>d</sup> |
|----------------------|-------------------------------------------------------|------------------------|-----------------|---------------------|
| 1                    | CoCl <sub>2</sub>                                     | Trace                  | -               | -                   |
| 2                    | Co(NTf <sub>2</sub> ) <sub>2</sub>                    | 61                     | 19:1            | 69                  |
| 3                    | Co(ClO <sub>4</sub> ) <sub>2</sub> ·6H <sub>2</sub> O | 65                     | 19:1            | 61                  |

|   |                                                      |    |      |       |
|---|------------------------------------------------------|----|------|-------|
| 4 | Co(BF <sub>4</sub> ) <sub>2</sub> ·6H <sub>2</sub> O | 43 | 8:1  | 55/61 |
| 5 | Co(OTf) <sub>2</sub>                                 | 84 | 19:1 | 80    |

Unless otherwise noted, all reactions were carried out with **1a** (0.20 mmol), **2a** (0.1 mmol), and Metal salt/L<sub>3</sub>-PrCy<sub>3</sub> (1:1, 10 mol%) in DCM (1.0 mL) under nitrogen at -10°C. After reacted for 12 hours, added DBU (0.15 mmol) and continue to react for another 12 hours. <sup>b</sup>Isolated yield of **5aa**. <sup>c</sup>Determined by <sup>1</sup>H NMR. <sup>d</sup>Determined by HPLC on a chiral stationary phase.

## 7. X-ray crystallography

### 7.1 The X-Ray diffraction of **3aa**

The colourless crystal in block-shape, with approximate dimensions of 0.348 × 0.678 × 0.777 mm<sup>3</sup>, was selected and mounted for the single-crystal X-ray diffraction. The data set was collected by Bruker D8 Venture Photon II diffractometer at 173(2)K equipped with micro-focus Cu radiation source ( $K_{\alpha}$  = 1.54178Å). Applied with face-indexed numerical absorption correction, the structure solution was solved and refinement was processed by SHELXTL (version 6.14) and OLEX 2.3 program package<sup>[6-9]</sup>. The structure was analyzed by ADDSYM routine implemented in PLATON suite and no higher symmetry was suggested<sup>[10]</sup>. CCDC 2155946 contains the supplementary crystallographic data which can be obtained free of charge from The Cambridge Crystallographic Data Center via <https://www.ccdc.cam.ac.uk/structures/>

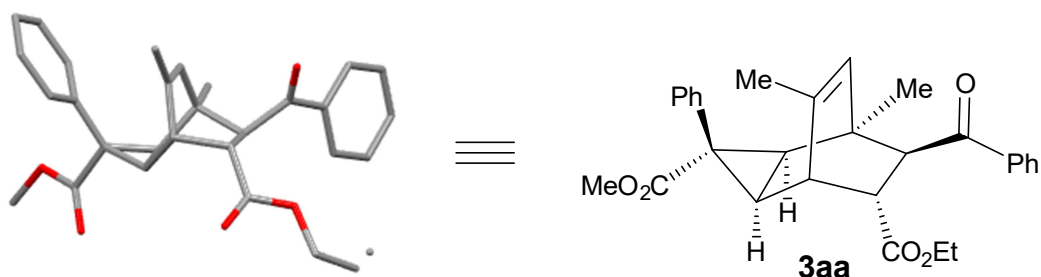

**Figure S1.** X-ray Crystal Structure of optical active product **3aa**.

The crystal of product **3aa** was obtained in the solvents of dichloromethane and petroleum ether. CCDC: 2155946. Crystallographic Data for C<sub>29</sub> H<sub>30</sub> O<sub>5</sub>

|                            |                                                |
|----------------------------|------------------------------------------------|
| Formula                    | C <sub>29</sub> H <sub>30</sub> O <sub>5</sub> |
| Formula mass (amu)         | 458.53                                         |
| Space group                | P 43 21 2                                      |
| <i>a</i> (Å)               | 9.9702(1)                                      |
| <i>b</i> (Å)               | 9.9702(1)                                      |
| <i>c</i> (Å)               | 48.7176(12)                                    |
| $\alpha$ (deg)             | 90                                             |
| $\beta$ (deg)              | 90                                             |
| $\gamma$ (deg)             | 90                                             |
| <i>V</i> (Å <sup>3</sup> ) | 4842.77(15)                                    |
| <i>Z</i>                   | 8                                              |
| $\lambda$ (Å)              | 1.54178                                        |
| <i>T</i> (K)               | 173 K                                          |



|                                                   |             |
|---------------------------------------------------|-------------|
| $\rho_{\text{calcd}}$ (g cm <sup>-3</sup> )       | 1.258       |
| $\mu$ (mm <sup>-1</sup> )                         | 0.685       |
| Transmission factors                              | 0.709,0.873 |
| $\theta_{\text{max}}$ (deg)                       | 68.358      |
| No. of unique data, including $F_o^2 < 0$         | 4386        |
| No. of unique data, with $F_o^2 > 2\sigma(F_o^2)$ | 4327        |
| No. of variables                                  | 323         |
| $R(F)$ for $F_o^2 > 2\sigma(F_o^2)$ <sup>a</sup>  | 0.0274      |
| $R_w(F_o^2)$ <sup>b</sup>                         | 0.0704      |
| Goodness of fit                                   | 1.064       |

$$^a R(F) = \sum ||F_o| - |F_c|| / \sum |F_o|.$$

$$^b R_w(F_o^2) = [\sum [w(F_o^2 - F_c^2)^2] / \sum wF_o^4]^{1/2}; w^{-1} = [\sigma^2(F_o^2) + (Ap)^2 + Bp], \text{ where } p = [\max(F_o^2, 0) + 2F_c^2] / 3.$$

## 7.2 The X-Ray diffraction of **1a**

The colourless crystal in block-shape, with approximate dimensions of 0.486 × 0.445 × 0.345 mm<sup>3</sup>, was selected and mounted for the single-crystal X-ray diffraction. The data set was collected by Bruker D8 Venture Photon II diffractometer at 173(2)K equipped with micro-focus Mo radiation source ( $K_{\alpha} = 0.71073\text{\AA}$ ). Applied with face-indexed numerical absorption correction, the structure solution was solved and refinement was processed by SHELXTL (version 6.14) and OLEX 2.3 program package<sup>[6-9]</sup>. The structure was analyzed by ADDSYM routine implemented in PLATON suite and no higher symmetry was suggested<sup>[10]</sup>. CCDC 2070991 contains the supplementary crystallographic data which can be obtained free of charge from The Cambridge Crystallographic Data Center via <https://www.ccdc.cam.ac.uk/structures/>

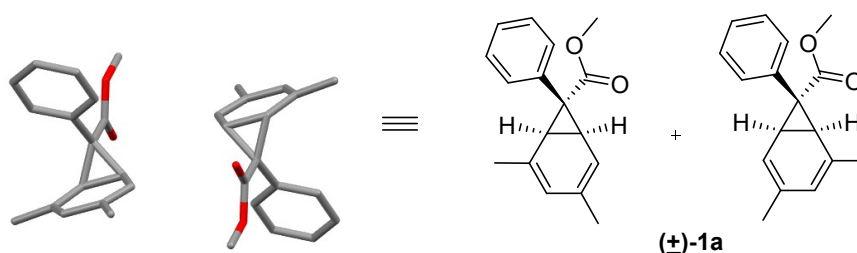

**Figure S2.** X-ray Crystal Structure of the racemic substrate **1a**.

The crystal of substrate **1a** was obtained in the solvents of dichloromethane and petroleum ether. CCDC: 2070991. Crystallographic Data for C17 H18 O2.

|                    |            |
|--------------------|------------|
| Formula            | C17 H18 O2 |
| Formula mass (amu) | 254.31     |
| Space group        | P 21/c     |
| $a$ (Å)            | 9.7199(3)  |
| $b$ (Å)            | 17.3733(6) |
| $c$ (Å)            | 8.5275(3)  |
| $\alpha$ (deg)     | 90         |
| $\beta$ (deg)      | 106.832(1) |

|                                                   |             |
|---------------------------------------------------|-------------|
| $\gamma$ (deg)                                    | 90          |
| $V$ (Å <sup>3</sup> )                             | 1378.32(8)  |
| $Z$                                               | 4           |
| $\lambda$ (Å)                                     | 0.71073     |
| $T$ (K)                                           | 173 K       |
| $\rho_{\text{calcd}}$ (g cm <sup>-3</sup> )       | 1.226       |
| $\mu$ (mm <sup>-1</sup> )                         | 0.079       |
| Transmission factors                              | 0.922,1.000 |
| $\theta_{\text{max}}$ (deg)                       | 25.371      |
| No. of unique data, including $F_o^2 < 0$         | 2477        |
| No. of unique data, with $F_o^2 > 2\sigma(F_o^2)$ | 2012        |
| No. of variables                                  | 175         |
| $R(F)$ for $F_o^2 > 2\sigma(F_o^2)$ <sup>a</sup>  | 0.0402      |
| $R_w(F_o^2)$ <sup>b</sup>                         | 0.1102      |
| Goodness of fit                                   | 1.087       |

$$^a R(F) = \sum ||F_o| - |F_c|| / \sum |F_o|.$$

$$^b R_w(F_o^2) = [\sum [w(F_o^2 - F_c^2)^2] / \sum wF_o^4]^{1/2}; w^{-1} = [\sigma^2(F_o^2) + (Ap)^2 + Bp], \text{ where } p = [\max(F_o^2, 0) + 2F_c^2] / 3.$$

### 7.3 The X-Ray diffraction of **5ab**

The colourless crystal in block-shape, with approximate dimensions of  $0.322 \times 0.335 \times 0.704$  mm<sup>3</sup>, was selected and mounted for the single-crystal X-ray diffraction. The data set was collected by Bruker D8 Venture Photon II diffractometer at 173(2)K equipped with micro-focus Cu radiation source ( $K_\alpha = 1.54178\text{\AA}$ ). Applied with face-indexed numerical absorption correction, the structure solution was solved and refinement was processed by SHELXTL (version 6.14) and OLEX 2.3 program package<sup>6-9</sup>. The structure was analyzed by ADDSYM routine implemented in PLATON suite and no higher symmetry was suggested<sup>10</sup>.

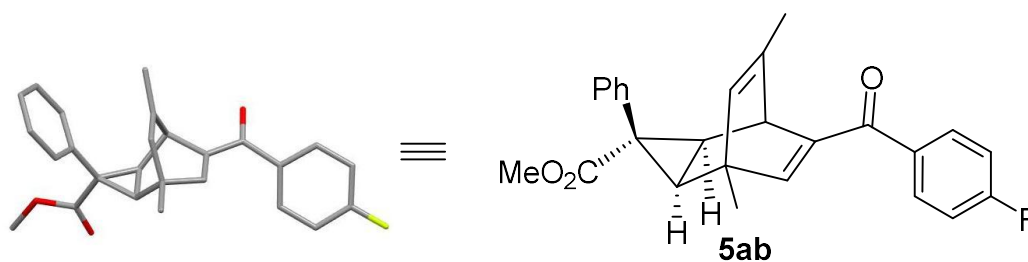

**Figure S3.** X-ray Crystal Structure of optical active product **5ab**

The crystal of substrate **5ab** was obtained in the solvents of dichloromethane and petroleum ether. CCDC: 2212551.

Crystallographic Data for C<sub>26</sub> H<sub>23</sub> F O<sub>3</sub>.

|                    |                                                  |
|--------------------|--------------------------------------------------|
| Formula            | C <sub>26</sub> H <sub>23</sub> F O <sub>3</sub> |
| Formula mass (amu) | 402.44                                           |
| Space group        | P 21 21 21                                       |
| $a$ (Å)            | 8.7024(3)                                        |
| $b$ (Å)            | 13.0704(5)                                       |

|                                                   |             |
|---------------------------------------------------|-------------|
| $c$ (Å)                                           | 18.7294(7)  |
| $a$ (deg)                                         | 90          |
| $\beta$ (deg)                                     | 90          |
| $\gamma$ (deg)                                    | 90          |
| $V$ (Å <sup>3</sup> )                             | 2130.35(14) |
| $Z$                                               | 4           |
| $\lambda$ (Å)                                     | 1.54178     |
| $T$ (K)                                           | 173 K       |
| $\rho_{\text{calcd}}$ (g cm <sup>-3</sup> )       | 1.255       |
| $\mu$ (mm <sup>-1</sup> )                         | 0.706       |
| Transmission factors                              | 0.682,0.844 |
| $\theta_{\text{max}}$ (deg)                       | 68.250      |
| No. of unique data, including $F_o^2 < 0$         | 3883        |
| No. of unique data, with $F_o^2 > 2\sigma(F_o^2)$ | 3792        |
| No. of variables                                  | 275         |
| $R(F)$ for $F_o^2 > 2\sigma(F_o^2)$ <sup>a</sup>  | 0.0273      |
| $R_w(F_o^2)$ <sup>b</sup>                         | 0.0674      |
| Goodness of fit                                   | 1.074       |

$$^a R(F) = \sum ||F_o| - |F_c|| / \sum |F_o|.$$

$$^b R_w(F_o^2) = [\sum [w(F_o^2 - F_c^2)^2] / \sum wF_o^4]^{1/2}; w^{-1} = [\sigma^2(F_o^2) + (Ap)^2 + Bp], \text{ where } p = [\max(F_o^2, 0) + 2F_c^2] / 3.$$

#### 7.4 The X-Ray diffraction of L<sub>3</sub>-PePr<sub>2</sub>/Co(BF<sub>4</sub>)<sub>2</sub>•6H<sub>2</sub>O complex

The pink crystal in block-shape, with approximate dimensions of 0.422 × 0.436 × 0.583 mm<sup>3</sup>, was selected and mounted for the single-crystal X-ray diffraction. The data set was collected by Bruker D8 Venture Photon II diffractometer at 173(2)K equipped with micro-focus Mo radiation source ( $K_\alpha = 0.71073\text{Å}$ ). Applied with face-indexed numerical absorption correction, the structure solution was solved and refinement was processed by SHELXTL (version 6.14) and OLEX 2.3 program package<sup>6-9</sup>. The value observed herein is indicative of racemic twinning and was accommodated during the refinement (using the SHELXL TWIN instruction). In this case, the relatively large standard uncertainty indicates that the structural data alone should not be used to confirm absolute stereochemistry, but should be used in conjunction with the established stereochemistry of the precursor compound. Thus the Flack parameter is provided for informational purposes only. The structure was analyzed by ADDSYM routine implemented in PLATON suite and no higher symmetry was suggested<sup>10</sup>.

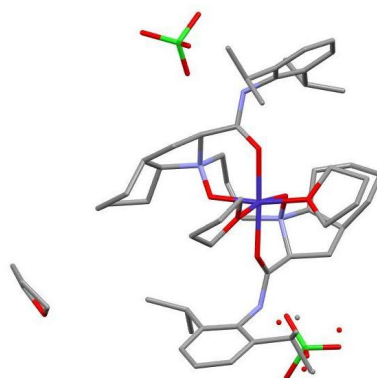

**Figure S4.** X-ray Crystal Structure of  $L_3\text{-PePr}_2/\text{Co}(\text{BF}_4)_2 \cdot 6\text{H}_2\text{O}$  complex

The crystal of the complex was obtained in the solvents of tetrahydrofuran and petroleum ether. CCDC: 2212550.

Crystallographic Data for C57 H92 Cl2 Co N4 O15

|                                                   |                       |
|---------------------------------------------------|-----------------------|
| Formula                                           | C57 H92 Cl2 Co N4 O15 |
| Formula mass (amu)                                | 1203.17               |
| Space group                                       | P 21 21 21            |
| $a$ (Å)                                           | 11.4334(7)            |
| $b$ (Å)                                           | 13.0191(8)            |
| $c$ (Å)                                           | 41.707(3)             |
| $\alpha$ (deg)                                    | 90                    |
| $\beta$ (deg)                                     | 90                    |
| $\gamma$ (deg)                                    | 90                    |
| $V$ (Å <sup>3</sup> )                             | 6208.1(7)             |
| $Z$                                               | 4                     |
| $\lambda$ (Å)                                     | 0.71073               |
| $T$ (K)                                           | 173 K                 |
| $\rho_{\text{calcd}}$ (g cm <sup>-3</sup> )       | 1.287                 |
| $\mu$ (mm <sup>-1</sup> )                         | 0.428                 |
| Transmission factors                              | 0.780,0.910           |
| $\theta_{\text{max}}$ (deg)                       | 25.379                |
| No. of unique data, including $F_o^2 < 0$         | 11374                 |
| No. of unique data, with $F_o^2 > 2\sigma(F_o^2)$ | 10340                 |
| No. of variables                                  | 778                   |
| $R(F)$ for $F_o^2 > 2\sigma(F_o^2)$ <sup>a</sup>  | 0.0400                |
| $R_w(F_o^2)$ <sup>b</sup>                         | 0.1059                |
| Goodness of fit                                   | 1.050                 |

$$^a R(F) = \sum ||F_o| - |F_c|| / \sum |F_o|.$$

$$^b R_w(F_o^2) = [\sum [w(F_o^2 - F_c^2)^2] / \sum wF_o^4]^{1/2}; w^{-1} = [\sigma^2(F_o^2) + (Ap)^2 + Bp], \text{ where } p = [\max(F_o^2, 0) + 2F_c^2] / 3.$$

## 8. Control experiments and mechanistic studies

### 8.1 Mass spectrometry analysis of the reaction system

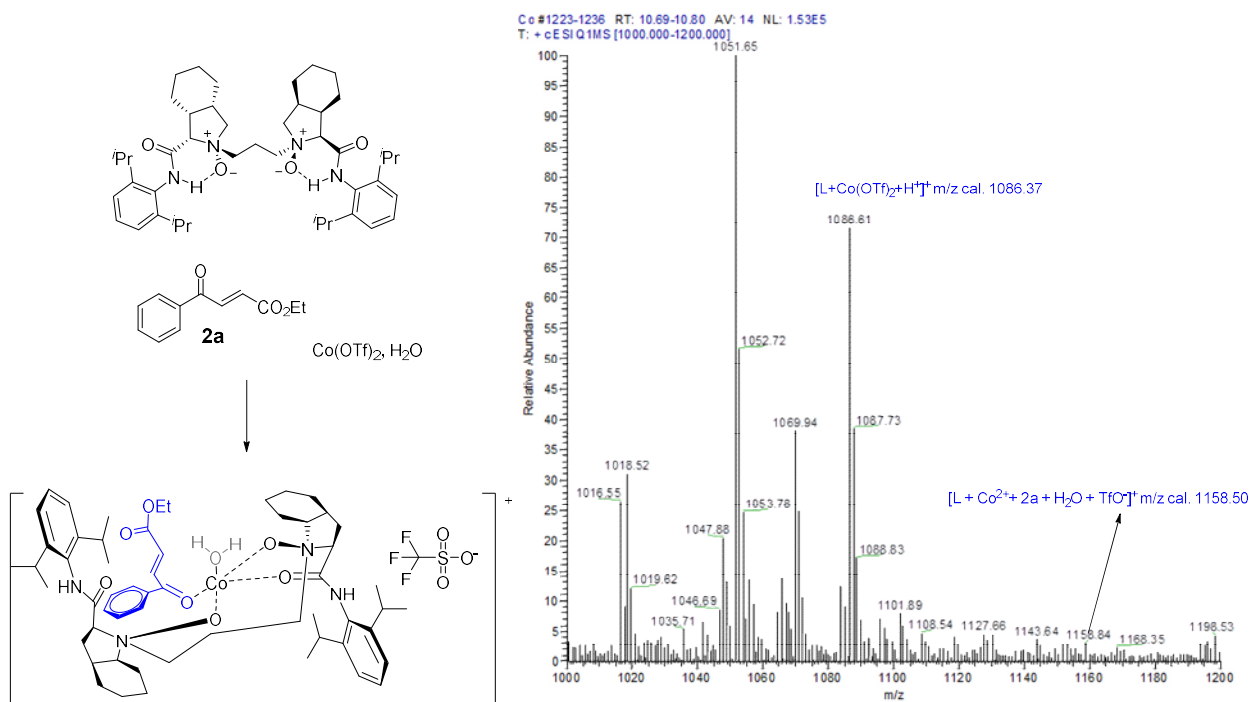

**Figure S5.** Mass spectrometry for the catalyst with enone **2a**

**Table S14.** Enantioselectivity-change of NCD **1a** during the transformation<sup>a</sup>

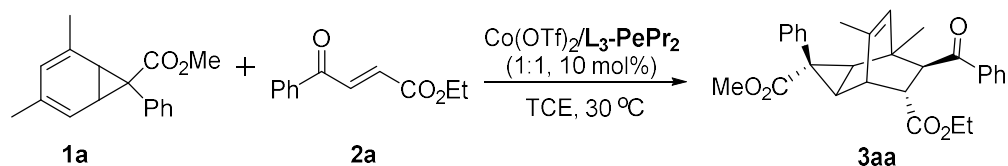

| Time (h) | ee (%) <sup>b</sup> |
|----------|---------------------|----------|---------------------|----------|---------------------|----------|---------------------|
| 4        | 15                  | 24       | 43                  | 48       | 55                  | 72       | 56                  |
| 8        | 20                  | 28       | 44                  | 52       | 53                  | 76       | 56                  |
| 12       | 33                  | 32       | 49                  | 56       | 54                  | 80       | 58                  |
| 16       | 43                  | 36       | 50                  | 60       | 55                  | 84       | 57                  |
| 20       | 42                  | 40       | 52                  | 64       | 56                  | 88       | 57                  |

<sup>a</sup>Unless otherwise noted, all reactions were carried out with **1a** (0.20 mmol), **2a** (0.1 mmol), and Co(OTf)<sub>2</sub>/L<sub>3</sub>-PePr<sub>2</sub> (1:1, 10 mol%) in TCE (1.0 mL) at 30 °C. <sup>b</sup>Ee of the unreacted **1a**, determined by HPLC on a chiral stationary phase.

**Table S15.** Diastereo-, and enantioselectivity variation of the product **3aa** during the reaction<sup>a</sup>

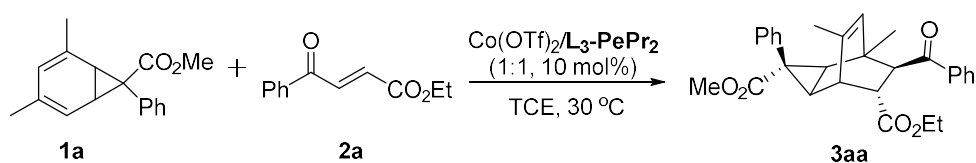

| entry | Time | yield (%) <sup>b</sup> | dr <sup>c</sup> | ee (%) <sup>d</sup> |
|-------|------|------------------------|-----------------|---------------------|
| 1     | 12 h | 60                     | 19:1            | 93                  |

|          |             |           |             |           |
|----------|-------------|-----------|-------------|-----------|
| 2        | 18 h        | 65        | 19:1        | 92        |
| 2        | 24 h        | 69        | 19:1        | 92        |
| 3        | 36 h        | 88        | 19:1        | 92        |
| <b>4</b> | <b>48 h</b> | <b>94</b> | <b>19:1</b> | <b>91</b> |
| 5        | 60 h        | 92        | 19:1        | 88        |
| 6        | 72 h        | 95        | 19:1        | 87        |

<sup>a</sup>Unless otherwise noted, all reactions were carried out with **1a** (0.20 mmol), **2a** (0.1 mmol), and Co(OTf)<sub>2</sub>/L<sub>3</sub>-PePr<sub>2</sub> (1:1, 10 mol%) in TCE (1.0 mL) at 30 °C. <sup>b</sup>Isolated yield of **3aa**. <sup>c</sup>Determined by <sup>1</sup>H NMR. <sup>d</sup>Ee of the product **3aa**, determined by HPLC on a chiral stationary phase.

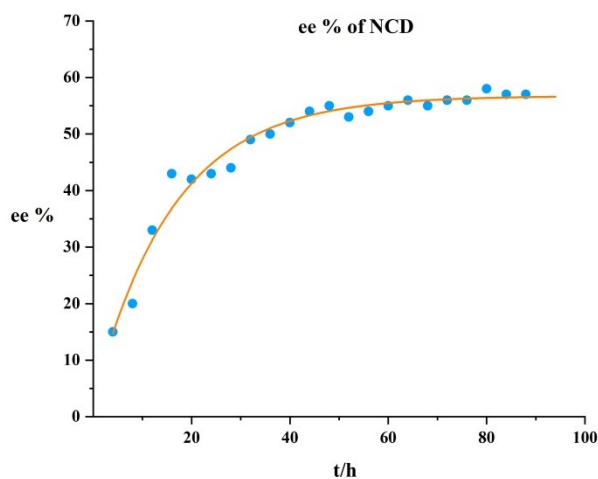

**Figure S6.** Variation of the ee of **1a** with the reaction time

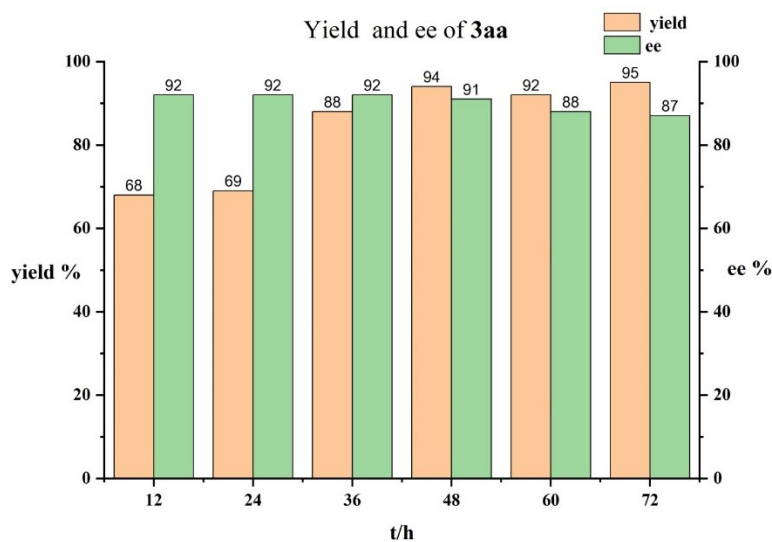

**Figure S7.** Variation of the yield and ee of the product **3aa** with the reaction time

**Table S16** The control experiments on the racemization of the NCD **1a**<sup>a</sup>

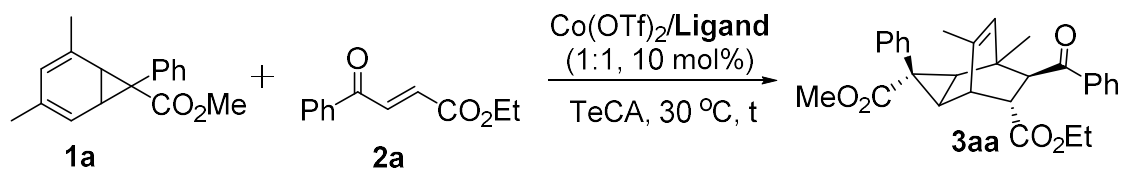

| entry           | Ligand                                             | time  | 1a (ee%) <sup>b</sup> | 1a (equiv.) <sup>c</sup> | 1a (recovered)  | 3aa                  |                 |                   |
|-----------------|----------------------------------------------------|-------|-----------------------|--------------------------|-----------------|----------------------|-----------------|-------------------|
|                 |                                                    |       |                       |                          | ee%, (rotation) | Yield % <sup>c</sup> | dr <sup>d</sup> | Ee % <sup>e</sup> |
| 1               | <b>L<sub>3</sub>-PePr<sub>2</sub></b>              | 48 h  | 0                     | 1.02                     | 53% ee; (+)     | 92                   | 19:1            | 91                |
| 2               | <b>L<sub>3</sub>-PePr<sub>2</sub></b>              | 48 h  | 53% ee; (+)           | 1.98                     | 60% ee; (+)     | Trace                | 5:1             | 65 / 35           |
| 3 <sup>f</sup>  | <b>L<sub>3</sub>-PePr<sub>2</sub></b>              | 48 h  | 53% ee; (+)           | 2.0                      | 45% ee; (+)     | —                    | —               | —                 |
| 4               | <b>L<sub>3</sub>-PePr<sub>2</sub></b>              | 48 h  | 52% ee; (-)           | 1.03                     | 7 % ee; (-)     | 95                   | 19:1            | 94                |
| 5 <sup>f</sup>  | <b>L<sub>3</sub>-PePr<sub>2</sub></b>              | 48 h  | 27% ee; (-)           | 2.0                      | 35 % ee; (-)    | —                    | —               | —                 |
| 6               | <b>L<sub>3</sub>-PePr<sub>2</sub></b>              | 336 h | 53% ee; (+)           | 1.03                     | 83% ee; (+)     | 93                   | 7:3             | 73 / 60           |
| 7               | —                                                  | 336 h | 53% ee; (+)           | 1.96                     | 47% ee; (+)     | Trace                | 1:1             | 60 / 60           |
| 8               | —                                                  | 48 h  | 52% ee; (-)           | 1.98                     | 45 % ee; (-)    | Trace                | 1:1             | 45 / 35           |
| 9               | <i>ent</i> - <b>L<sub>3</sub>-RaPr<sub>2</sub></b> | 72 h  | 0                     | 1.27                     | 52% ee; (-)     | 70                   | 19:1            | 79                |
| 10              | <i>ent</i> - <b>L<sub>3</sub>-RaPr<sub>2</sub></b> | 48 h  | 53% ee; (+)           | 0.98                     | 23% ee; (+)     | 94                   | 19:1            | 95                |
| 11 <sup>f</sup> | <i>ent</i> - <b>L<sub>3</sub>-RaPr<sub>2</sub></b> | 48 h  | 53% ee; (+)           | 2.0                      | 45% ee; (+)     | —                    | —               | —                 |
| 12 <sup>f</sup> | <i>ent</i> - <b>L<sub>3</sub>-RaPr<sub>2</sub></b> | 48 h  | 45% ee; (+)           | 2.0                      | 45% ee; (+)     | —                    | —               | —                 |
| 13 <sup>f</sup> | <i>ent</i> - <b>L<sub>3</sub>-RaPr<sub>2</sub></b> | 48 h  | 45% ee; (+)           | 2.0                      | 45% ee; (+)     | —                    | —               | —                 |
| 14 <sup>f</sup> | <i>ent</i> - <b>L<sub>3</sub>-RaPr<sub>2</sub></b> | 48 h  | 45% ee; (-)           | 2.0                      | 45 % ee; (-)    | —                    | —               | —                 |
| 15 <sup>f</sup> | <i>ent</i> - <b>L<sub>3</sub>-RaPr<sub>2</sub></b> | 48 h  | 45% ee; (-)           | 2.0                      | 45 % ee; (-)    | —                    | —               | —                 |
| 16              | <i>ent</i> - <b>L<sub>3</sub>-RaPr<sub>2</sub></b> | 48 h  | 27% ee; (-)           | 1.82                     | 65 % ee; (-)    | 15                   | 19:1            | 60 (-)            |
| 17 <sup>f</sup> | <i>ent</i> - <b>L<sub>3</sub>-RaPr<sub>2</sub></b> | 48 h  | 27% ee; (-)           | 2.0                      | 35 % ee; (-)    | —                    | —               | —                 |
| 18              | <b>(±)-L<sub>3</sub>-PiPr<sub>2</sub></b>          | 48 h  | 47% ee; (+)           | 1.30                     | 43% ee; (+)     | 66                   | 19:1            | 37                |

|    |                                       |      |             |      |             |    |      |    |
|----|---------------------------------------|------|-------------|------|-------------|----|------|----|
| 19 | (±)-L <sub>3</sub> -PiPr <sub>2</sub> | 48 h | 50% ee; (-) | 1.25 | 52% ee; (-) | 71 | 19:1 | 50 |
| 20 | (±)-L <sub>3</sub> -PiPr <sub>2</sub> | 48 h | 0           | 1.30 | 0 ee        | 64 | 19:1 | 0  |

<sup>a</sup>Unless otherwise noted, all reactions were carried out with **1a** (0.20 mmol), **2a** (0.1 mmol), and Co(OTf)<sub>2</sub>/L<sub>3</sub>-PePr<sub>2</sub> (1:1, 10 mol%) in TCE (1.0 mL) at 30 °C for 24 h. <sup>b</sup>The ee of **1a** before react. <sup>c</sup>Isolated yield of **1a**. <sup>d</sup>Isolated yield of **3aa**. <sup>e</sup>Determined by <sup>1</sup>H NMR. <sup>f</sup>Without **2a**.

## 8.2 Computational studies

All computations were carried out using the Gaussian 09 D.01 software package<sup>11</sup>. The calculation of geometry optimization, frequency and Gibbs energy corrections were carried out for *exo-1a*, *endo-1a*, CHT-**a**, CHT-**b** at the temperature of 298.15K. All calculations were performed at M06-2X<sup>12</sup> level of theory with Grimme's D3 empirical dispersion correction<sup>13</sup> and SMD (dichloromethane) implicit solvation model<sup>14</sup>. The def-SVP basis set<sup>15</sup> was used for all atoms. Frequency calculations were calculated at the same level and no imaginary frequencies were observed. Single-point energies were obtained at the M06-2X, SMD (dichloromethane)/def2-TZVP<sup>16</sup> level of theory with GD3 empirical dispersion correction. The calculation of geometry optimization, frequency and Gibbs energy corrections were carried out for Co(II)-L<sub>3</sub>-PrPr<sub>2</sub>, Co(II)-L<sub>3</sub>-PiPr<sub>2</sub>, Co(II)-L<sub>3</sub>-RaPr<sub>2</sub>, Co(II)-L<sub>3</sub>-TQPr<sub>2</sub>, Co(II)-L<sub>3</sub>-PePr<sub>2</sub>, Co(II)-L<sub>3</sub>-PePr<sub>3</sub> at the temperature of 298.15K. All calculations were performed at B3LYP<sup>17</sup> level of theory with Grimme's D3 empirical dispersion correction<sup>13</sup> and SMD (dichloromethane) implicit solvation model<sup>14</sup>. The def-SVP basis set<sup>16</sup> was used for all atoms.

### Coordinates

#### *exo-1a*

|   |             |             |             |
|---|-------------|-------------|-------------|
| C | -1.44824000 | -1.39921300 | 1.15681200  |
| C | -1.49346400 | -0.92450000 | -1.67226200 |
| C | -2.52993500 | -0.54114800 | -0.89389700 |
| C | -2.48718900 | -0.78682300 | 0.54671100  |
| H | -1.56541100 | -0.84593800 | -2.75992100 |
| H | -3.37436500 | -0.52952500 | 1.13302300  |
| C | -3.77842100 | 0.07484400  | -1.45881000 |
| H | -4.66830300 | -0.50740800 | -1.17255500 |
| H | -3.92038700 | 1.09205100  | -1.06026000 |
| H | -3.73728400 | 0.13598800  | -2.55446700 |
| C | -1.46387900 | -1.79631700 | 2.60194100  |
| H | -2.41296800 | -1.52766500 | 3.08408100  |
| H | -1.31302000 | -2.88332100 | 2.70355100  |
| H | -0.64035600 | -1.31191800 | 3.15169200  |
| C | -0.22942500 | -1.73375200 | 0.38785900  |
| C | 0.63594600  | -0.62315600 | -0.20264600 |



|   |             |             |             |
|---|-------------|-------------|-------------|
| C | -0.25394100 | -1.48121700 | -1.10555600 |
| H | 0.35001000  | -2.58952500 | 0.74331700  |
| H | 0.31575400  | -2.17007300 | -1.73233000 |
| C | 2.07562700  | -1.01702000 | -0.29861500 |
| O | 2.45732800  | -2.14823300 | -0.48163300 |
| O | 2.90394700  | 0.01620900  | -0.16607300 |
| C | 4.29340100  | -0.27574300 | -0.26983600 |
| H | 4.81539300  | 0.68037300  | -0.16092000 |
| H | 4.60345300  | -0.96932300 | 0.52349000  |
| H | 4.52166400  | -0.72377200 | -1.24643500 |
| C | 0.33762300  | 0.82298400  | 0.04486000  |
| C | 0.20748700  | 1.71260900  | -1.02613200 |
| C | 0.24095200  | 1.31464800  | 1.35069700  |
| C | -0.01599000 | 3.07025400  | -0.79781900 |
| H | 0.28297100  | 1.33293300  | -2.04788700 |
| C | 0.01764600  | 2.67150900  | 1.58343500  |
| H | 0.34344500  | 0.62258600  | 2.18997300  |
| C | -0.11358900 | 3.55185200  | 0.50867200  |
| H | -0.11354100 | 3.75537900  | -1.64197200 |
| H | -0.05435500 | 3.04270700  | 2.60745000  |
| H | -0.29055200 | 4.61377900  | 0.68933000  |

Zero-point correction = 0.309373

Thermal correction to Enthalpy = 0.3279

Thermal correction to Gibbs Free Energy = 0.263839

*endo-1a*

|   |             |             |             |
|---|-------------|-------------|-------------|
| C | -1.73932200 | -1.76595500 | 0.13640100  |
| C | -1.81750100 | 0.53025300  | -1.59685400 |
| C | -2.88314200 | 0.20082100  | -0.83588100 |
| C | -2.82625700 | -0.97277800 | 0.04080700  |
| H | -1.89832300 | 1.33414100  | -2.33272600 |
| H | -3.73405800 | -1.24137100 | 0.58907400  |
| C | -4.18442600 | 0.95034400  | -0.90463400 |
| H | -5.01477000 | 0.27229700  | -1.15684100 |
| H | -4.42593900 | 1.39948900  | 0.07206800  |
| H | -4.14771600 | 1.75285700  | -1.65344700 |
| C | -1.70672000 | -3.02490200 | 0.94752200  |
| H | -2.68265100 | -3.23881300 | 1.40324400  |
| H | -1.41129400 | -3.88459000 | 0.32442500  |
| H | -0.95567800 | -2.93827200 | 1.74983600  |

|   |             |             |             |
|---|-------------|-------------|-------------|
| C | -0.48425600 | -1.39966500 | -0.56287900 |
| C | 0.26515700  | -0.14348100 | -0.20838100 |
| C | -0.52393800 | -0.17500200 | -1.48975100 |
| H | 0.15820500  | -2.23676300 | -0.85135100 |
| H | 0.08910600  | -0.20476700 | -2.39389600 |
| C | -0.22214600 | 0.70680100  | 0.93932600  |
| O | -0.52765900 | 0.29540600  | 2.02751400  |
| O | -0.20235000 | 2.00073600  | 0.62319800  |
| C | -0.62346000 | 2.90088000  | 1.64155500  |
| H | -0.50921100 | 3.90876100  | 1.22967400  |
| H | -1.67552700 | 2.71652800  | 1.90143000  |
| H | -0.00576700 | 2.78557100  | 2.54234100  |
| C | 1.76896600  | -0.15532300 | -0.26857400 |
| C | 2.49125500  | -1.00551100 | 0.57731800  |
| C | 2.46076200  | 0.71717200  | -1.11478100 |
| C | 3.88526400  | -0.99180400 | 0.56808800  |
| H | 1.95118300  | -1.68242500 | 1.24396900  |
| C | 3.85567100  | 0.73016500  | -1.12543500 |
| H | 1.89913500  | 1.38846600  | -1.76830200 |
| C | 4.56987400  | -0.12458600 | -0.28490900 |
| H | 4.44022600  | -1.66114300 | 1.22795800  |
| H | 4.38720000  | 1.41153600  | -1.79230100 |
| H | 5.66126300  | -0.11521200 | -0.29447300 |

Zero-point correction = 0.309175

Thermal correction to Enthalpy = 0.327945

Thermal correction to Gibbs Free Energy = 0.262285

#### CHT-a

|   |             |             |             |
|---|-------------|-------------|-------------|
| C | 2.59242000  | -0.30682500 | 0.22458000  |
| C | 2.41552400  | -0.05205600 | -1.10086700 |
| C | 1.38474700  | -0.70149200 | -1.90269700 |
| C | 1.83838200  | -1.24469800 | 1.04782500  |
| C | 0.16272800  | -1.07435800 | -1.48038600 |
| C | 0.52412100  | -1.50614500 | 0.87861900  |
| C | -0.35894700 | -0.76084000 | -0.09544500 |
| H | 3.47427500  | 0.13827000  | 0.69959800  |
| H | 1.64431400  | -0.89916400 | -2.94847400 |
| H | -0.49499800 | -1.61825000 | -2.16222800 |
| H | 0.04153000  | -2.27188000 | 1.49080100  |
| C | 3.37189000  | 0.83943100  | -1.84731200 |

|   |             |             |             |
|---|-------------|-------------|-------------|
| H | 4.14878800  | 1.24203500  | -1.18404100 |
| H | 3.86067400  | 0.28777600  | -2.66612900 |
| H | 2.83511700  | 1.68418300  | -2.30765900 |
| C | 2.62384800  | -1.93217600 | 2.13728800  |
| H | 3.47148000  | -2.49686600 | 1.71988100  |
| H | 3.04498300  | -1.18614800 | 2.83017800  |
| H | 1.99332500  | -2.62022800 | 2.71544500  |
| C | -1.80442500 | -1.24557200 | 0.05975600  |
| O | -2.24552800 | -1.79655100 | 1.03378300  |
| O | -2.54429000 | -0.92943300 | -0.99865400 |
| C | -3.92935000 | -1.25385900 | -0.92185800 |
| H | -4.39938500 | -0.73259700 | -0.07687200 |
| H | -4.37469300 | -0.92082300 | -1.86461600 |
| H | -4.06536700 | -2.33666400 | -0.79942900 |
| C | -0.45695600 | 0.75061800  | 0.21295700  |
| C | -0.60961100 | 1.70079400  | -0.80119000 |
| C | -0.49107500 | 1.17248500  | 1.54628600  |
| C | -0.75890900 | 3.05222600  | -0.48634200 |
| H | -0.60516400 | 1.38577700  | -1.84606700 |
| C | -0.64251800 | 2.52230400  | 1.86163700  |
| H | -0.39009500 | 0.43572600  | 2.34601600  |
| C | -0.77121700 | 3.46876400  | 0.84475700  |
| H | -0.86659500 | 3.78421800  | -1.28910500 |
| H | -0.65901500 | 2.83423800  | 2.90766400  |
| H | -0.88454400 | 4.52666800  | 1.08835700  |

Zero-point correction = 0.308827

Thermal correction to Enthalpy = 0.327591

Thermal correction to Gibbs Free Energy = 0.263658

#### CHT-b

|   |             |             |             |
|---|-------------|-------------|-------------|
| C | -2.73369900 | -0.71940200 | -0.16496800 |
| C | -2.75686100 | 0.35099200  | 0.68099200  |
| C | -1.75186600 | 0.55215900  | 1.71626400  |
| C | -1.76300800 | -1.80659200 | -0.16812200 |
| C | -0.44726800 | 0.23987200  | 1.60416900  |
| C | -0.45204400 | -1.62584900 | 0.10589900  |
| C | 0.15366000  | -0.25775900 | 0.31207600  |
| H | -3.60739500 | -0.85822800 | -0.81242700 |
| H | -2.10541800 | 0.98224000  | 2.65924200  |
| H | 0.20634000  | 0.32453300  | 2.47545400  |

|   |             |             |             |
|---|-------------|-------------|-------------|
| H | 0.20369900  | -2.49575600 | 0.19254500  |
| C | -3.91703100 | 1.31065200  | 0.67297300  |
| H | -4.68069900 | 1.01465300  | -0.05817600 |
| H | -4.38505600 | 1.36349300  | 1.66856200  |
| H | -3.57566400 | 2.32891200  | 0.42740100  |
| C | -2.30947200 | -3.17699100 | -0.48037600 |
| H | -3.08241600 | -3.47075900 | 0.24644300  |
| H | -2.78471400 | -3.18049200 | -1.47400000 |
| H | -1.51643400 | -3.93636700 | -0.47476100 |
| C | 1.68634000  | -0.27096000 | 0.32562800  |
| C | 2.40473400  | 0.67722800  | 1.06331200  |
| C | 2.39206800  | -1.16415800 | -0.48937900 |
| C | 3.79864200  | 0.70414500  | 1.02006200  |
| H | 1.87472800  | 1.41324800  | 1.66999700  |
| C | 3.78563100  | -1.13761200 | -0.53324800 |
| H | 1.84916800  | -1.88192300 | -1.10669500 |
| C | 4.49461500  | -0.20831200 | 0.22781200  |
| H | 4.34200400  | 1.44736600  | 1.60634900  |
| H | 4.31909700  | -1.84650100 | -1.16900600 |
| H | 5.58537900  | -0.18934400 | 0.19633800  |
| C | -0.16386500 | 0.65752300  | -0.89485200 |
| O | -0.26484800 | 0.27052200  | -2.02729400 |
| O | -0.19166300 | 1.94284900  | -0.55471500 |
| C | -0.37488700 | 2.86679100  | -1.62159100 |
| H | -0.33902700 | 3.86548600  | -1.17451200 |
| H | 0.42199300  | 2.75798800  | -2.37001400 |
| H | -1.34761700 | 2.70411400  | -2.10658200 |

Zero-point correction = 0.307947

Thermal correction to Enthalpy = 0.326984

Thermal correction to Gibbs Free Energy = 0.261945

#### Co(II)-L<sub>3</sub>-PrPr<sub>2</sub>

|    |             |             |             |
|----|-------------|-------------|-------------|
| Co | -0.05609800 | 0.81196000  | 0.10583200  |
| O  | -0.07999300 | -1.06443100 | -0.67345300 |
| O  | -0.52955400 | 0.22205200  | 1.98084400  |
| O  | 2.01945600  | 0.58548000  | 0.34778500  |
| O  | -2.11174000 | 1.21017000  | -0.19723600 |
| O  | 0.17099800  | 1.64581000  | -1.82080300 |
| O  | 0.28758800  | 2.79704700  | 0.76903400  |
| N  | -1.71074100 | -0.44162100 | 2.26200900  |

|   |             |             |             |
|---|-------------|-------------|-------------|
| C | -3.04543600 | 0.72449600  | 0.46157200  |
| N | 0.82103000  | -2.02526200 | -0.23763400 |
| C | 2.74499100  | -0.38421300 | 0.06864600  |
| C | -1.80468900 | -0.50724900 | 3.76712100  |
| C | -2.93046200 | 0.43045100  | 1.94853100  |
| C | -1.83210100 | -1.76677200 | 1.55220400  |
| N | -4.22688100 | 0.42377800  | -0.08746700 |
| C | -4.46983500 | 0.51420300  | -1.49853000 |
| C | 0.71510200  | -2.30966500 | 1.24044100  |
| C | 0.62687900  | -3.23184100 | -1.12738800 |
| C | 2.24438700  | -1.64559000 | -0.60974400 |
| N | 4.05683200  | -0.38583600 | 0.31801700  |
| C | 4.72838200  | 0.73954700  | 0.89808100  |
| C | -0.66471700 | -2.72710000 | 1.73599400  |
| C | -2.14041600 | 0.93899300  | 4.17371000  |
| C | -2.72853700 | 1.60584900  | 2.89934600  |
| C | -4.64833000 | 1.77523400  | -2.10625900 |
| C | -4.50895000 | -0.68792400 | -2.23907400 |
| C | -4.86927000 | 1.80798100  | -3.49169100 |
| C | -4.57990600 | 3.07957200  | -1.32198800 |
| C | -4.91820500 | 0.63329500  | -4.24325700 |
| C | -4.74147900 | -0.60197900 | -3.61959700 |
| C | -4.28186400 | -2.04582800 | -1.58686300 |
| C | -5.88089400 | 3.88937900  | -1.43713500 |
| C | -3.35998300 | 3.90834200  | -1.75726300 |
| C | -3.00192200 | -2.70834700 | -2.12061100 |
| C | -5.50761000 | -2.95962000 | -1.72727900 |
| C | 1.21643500  | -2.78989300 | -2.47503700 |
| C | 2.19480600  | -1.63371100 | -2.13942900 |
| C | 4.83982100  | 0.81538600  | 2.30189200  |
| C | 5.24214400  | 1.73389800  | 0.03832100  |
| C | 5.15543100  | 1.56614700  | -1.47417400 |
| C | 5.87162600  | 2.84030500  | 0.62627800  |
| C | 5.98327600  | 2.94517200  | 2.01489500  |
| C | 5.47740800  | 1.94256600  | 2.84335500  |
| C | 4.24953100  | -0.26730300 | 3.19933700  |
| C | 5.05791600  | 2.89182700  | -2.23713300 |
| C | 6.33061100  | 0.71157700  | -1.98400500 |
| C | 5.13801100  | -0.60406600 | 4.40431400  |
| C | 2.82947100  | 0.11846300  | 3.65452700  |

|    |             |             |             |
|----|-------------|-------------|-------------|
| Cl | -5.64852500 | -2.40726200 | 2.15708300  |
| O  | -6.04952800 | -1.26485400 | 1.25271300  |
| O  | -4.90227900 | -1.84364300 | 3.32944400  |
| O  | -6.86930200 | -3.10175000 | 2.61505000  |
| O  | -4.76178400 | -3.35265300 | 1.41713400  |
| C  | 1.35939700  | 2.32730300  | -2.26804500 |
| C  | -0.58785100 | 1.12863200  | -2.94232300 |
| C  | 1.09422400  | 2.62722300  | -3.73744800 |
| C  | 0.28542800  | 1.39407200  | -4.16695900 |
| C  | -0.51161300 | 3.93623300  | 0.39682700  |
| C  | 1.00654400  | 3.04518900  | 1.99947300  |
| C  | 0.04255700  | 5.08510000  | 1.23082300  |
| C  | 0.44894600  | 4.36594600  | 2.52453600  |
| H  | -4.90844600 | -0.10197100 | 0.47964700  |
| H  | 4.60077400  | -1.23634900 | 0.09621400  |
| H  | -1.94664900 | -1.52755300 | 0.49160800  |
| H  | -2.75605000 | -2.22998600 | 1.91585900  |
| H  | -0.54449600 | -2.97176200 | 2.80396500  |
| H  | -0.97053700 | -3.66682400 | 1.24844500  |
| H  | 1.02993200  | -1.39400200 | 1.74641900  |
| H  | 1.44032600  | -3.10807700 | 1.44911900  |
| H  | -0.84369600 | -0.87901100 | 4.13735400  |
| H  | -2.61040900 | -1.20937200 | 4.01800900  |
| H  | -1.24292300 | 1.47279700  | 4.51167900  |
| H  | -2.86484700 | 0.93313800  | 4.99982100  |
| H  | -2.01582300 | 2.31342000  | 2.45912600  |
| H  | -3.68110200 | 2.12121100  | 3.07981700  |
| H  | -3.79693100 | -0.16109400 | 2.26843900  |
| H  | -5.00519800 | 2.77121200  | -3.98934400 |
| H  | -5.09449300 | 0.68158400  | -5.32130200 |
| H  | -4.77725000 | -1.51868800 | -4.21316600 |
| H  | -4.45023100 | 2.82957900  | -0.25923600 |
| H  | -2.44059100 | 3.31371200  | -1.67238400 |
| H  | -3.25132000 | 4.80520300  | -1.12520500 |
| H  | -3.46141600 | 4.24686400  | -2.80182000 |
| H  | -6.75016900 | 3.30589400  | -1.09325200 |
| H  | -6.07512900 | 4.20215600  | -2.47610500 |
| H  | -5.82062500 | 4.80303900  | -0.82267300 |
| H  | -4.13659900 | -1.89694600 | -0.51144800 |
| H  | -2.12396600 | -2.06393200 | -1.95581300 |

|   |             |             |             |
|---|-------------|-------------|-------------|
| H | -3.07213500 | -2.92666500 | -3.19937400 |
| H | -2.82443600 | -3.66384400 | -1.59929800 |
| H | -5.33470700 | -3.90687900 | -1.19381700 |
| H | -5.73058700 | -3.19021900 | -2.78246500 |
| H | -6.39565000 | -2.48997700 | -1.27666100 |
| H | -0.44111500 | -3.46571300 | -1.13817300 |
| H | 1.19320800  | -4.06246100 | -0.68566300 |
| H | 1.74478700  | -3.63257500 | -2.93941200 |
| H | 0.42656300  | -2.44924300 | -3.15691900 |
| H | 3.20040300  | -1.79480400 | -2.54267400 |
| H | 1.80910200  | -0.66911900 | -2.49009300 |
| H | 2.86886900  | -2.48535900 | -0.28157400 |
| H | 6.28252100  | 3.63081000  | -0.00435800 |
| H | 6.47461300  | 3.81708100  | 2.45543700  |
| H | 5.57854500  | 2.03972000  | 3.92613100  |
| H | 4.23461300  | 1.00375300  | -1.69025300 |
| H | 6.33300900  | -0.29084400 | -1.53088900 |
| H | 7.29349600  | 1.19929000  | -1.75747900 |
| H | 6.26518100  | 0.57585900  | -3.07627000 |
| H | 4.85435700  | 2.69826700  | -3.30249800 |
| H | 5.99614600  | 3.46787800  | -2.18620000 |
| H | 4.24691300  | 3.52725100  | -1.84650500 |
| H | 2.85840500  | 1.02077300  | 4.28854100  |
| H | 6.16832900  | -0.84350000 | 4.09589800  |
| H | 5.18309400  | 0.22632900  | 5.12772500  |
| H | 4.73164000  | -1.47805100 | 4.93885900  |
| H | 2.17254000  | 0.33003100  | 2.80078200  |
| H | 2.37649300  | -0.69491100 | 4.24562200  |
| H | 2.22731300  | 1.66230400  | -2.13457900 |
| H | 1.50463300  | 3.21195900  | -1.63286200 |
| H | 0.48520300  | 3.54116600  | -3.83602000 |
| H | 2.02262300  | 2.76546700  | -4.31064800 |
| H | 0.96138200  | 0.54285200  | -4.34959200 |
| H | -0.31272300 | 1.55716500  | -5.07528900 |
| H | -1.54637600 | 1.66815400  | -2.98413000 |
| H | -0.78842900 | 0.06530100  | -2.75426800 |
| H | -1.56650400 | 3.72299400  | 0.63219600  |
| H | 2.08059000  | 3.10717600  | 1.76333900  |
| H | -0.42233200 | 4.07839000  | -0.68842700 |
| H | 0.92808700  | 5.52177100  | 0.73965400  |

|    |             |             |             |
|----|-------------|-------------|-------------|
| H  | -0.69657800 | 5.88485300  | 1.38485800  |
| H  | -0.43936000 | 4.18505100  | 3.15209900  |
| H  | 1.18579700  | 4.92035500  | 3.12381800  |
| H  | 0.83422200  | 2.19126400  | 2.66686700  |
| Cl | 5.30361600  | -3.54500100 | -1.40862600 |
| O  | 6.39609600  | -4.53945500 | -1.46367700 |
| O  | 5.38511400  | -2.80738700 | -0.08607700 |
| O  | 5.43858600  | -2.56021900 | -2.52119200 |
| O  | 3.97677400  | -4.22746500 | -1.49107700 |
| H  | 4.16355800  | -1.18246400 | 2.59323400  |

**Co(II)-L<sub>3</sub>-PiPr<sub>2</sub>**

|    |             |             |             |
|----|-------------|-------------|-------------|
| Co | -0.03167500 | 0.85327300  | -0.25008000 |
| O  | -0.02043200 | -1.09779600 | -0.83750200 |
| O  | -0.34786100 | 0.48926100  | 1.71444500  |
| O  | 2.05178600  | 0.74742800  | -0.00287600 |
| O  | -2.12261700 | 1.01460500  | -0.50966600 |
| O  | 0.11577900  | 1.50051600  | -2.25485600 |
| O  | 0.21591500  | 2.92293600  | 0.16227300  |
| N  | -1.48605900 | -0.15194200 | 2.16436200  |
| C  | -2.98735500 | 0.64415200  | 0.30244700  |
| N  | 0.93321700  | -1.98086900 | -0.36378500 |
| C  | 2.77042600  | -0.26606400 | -0.05888200 |
| C  | -1.39350200 | -0.21721900 | 3.67890100  |
| C  | -2.74892400 | 0.64918600  | 1.80942800  |
| C  | -1.63307200 | -1.54420500 | 1.57715000  |
| N  | -4.21112300 | 0.26905300  | -0.07993600 |
| C  | -4.58380500 | 0.14428500  | -1.45925900 |
| C  | 0.89566900  | -2.11404400 | 1.14924800  |
| C  | 0.67645100  | -3.32830200 | -1.01926300 |
| C  | 2.34238800  | -1.54481400 | -0.76749300 |
| N  | 4.01788800  | -0.27652100 | 0.41348200  |
| C  | 4.63057900  | 0.89068300  | 0.97695500  |
| C  | -0.44933500 | -2.48647500 | 1.76373500  |
| C  | -1.29401800 | 1.17537800  | 4.28415900  |
| C  | -2.47059900 | 2.06126200  | 3.86990900  |
| C  | -2.62353700 | 2.07290200  | 2.34771100  |
| C  | -4.87775000 | 1.29717300  | -2.21745700 |
| C  | -4.63321100 | -1.15354500 | -2.01308500 |
| C  | -5.22142600 | 1.12090300  | -3.56668600 |



|    |             |             |             |
|----|-------------|-------------|-------------|
| C  | -4.81307300 | 2.70060600  | -1.62731300 |
| C  | -5.27879400 | -0.15194500 | -4.13609000 |
| C  | -4.99025000 | -1.27769800 | -3.36379100 |
| C  | -4.28836300 | -2.38947800 | -1.19214200 |
| C  | -6.15274900 | 3.44209500  | -1.75893000 |
| C  | -3.66255800 | 3.50423900  | -2.25595300 |
| C  | -3.01622600 | -3.06836800 | -1.72357400 |
| C  | -5.47183000 | -3.36272300 | -1.09961500 |
| C  | 0.75270200  | -3.23136000 | -2.53581900 |
| C  | 2.10276500  | -2.68055000 | -2.99913700 |
| C  | 2.42080100  | -1.36645800 | -2.28472200 |
| C  | 4.65225800  | 1.03662000  | 2.37766500  |
| C  | 5.17733100  | 1.85486100  | 0.10120800  |
| C  | 5.16311900  | 1.62250100  | -1.40613900 |
| C  | 5.75717200  | 2.99583000  | 0.67270800  |
| C  | 5.78888000  | 3.16486100  | 2.05982300  |
| C  | 5.24427700  | 2.19638400  | 2.90293900  |
| C  | 4.00155700  | 0.00010800  | 3.28723400  |
| C  | 5.19338000  | 2.91264900  | -2.23276600 |
| C  | 6.30478300  | 0.67290400  | -1.81477900 |
| C  | 4.81200400  | -0.28608300 | 4.55813500  |
| C  | 2.56037600  | 0.42130000  | 3.62982700  |
| Cl | -5.40592000 | -2.10483900 | 2.69519800  |
| O  | -5.91871900 | -1.12357600 | 1.66696100  |
| O  | -4.53438100 | -3.11985000 | 2.03236000  |
| O  | -4.60328600 | -1.35035200 | 3.71136100  |
| O  | -6.55975000 | -2.76390800 | 3.34074100  |
| C  | 1.24258700  | 2.23028000  | -2.78527900 |
| C  | -0.65592700 | 0.88384800  | -3.31331200 |
| C  | 0.95598300  | 2.35087700  | -4.27777100 |
| C  | 0.19943200  | 1.04558700  | -4.56631800 |
| C  | -0.64587000 | 3.97790300  | -0.31180900 |
| C  | 1.05258900  | 3.37962600  | 1.24864900  |
| C  | -0.14112600 | 5.24184700  | 0.37987000  |
| C  | 0.41608300  | 4.68882800  | 1.69928600  |
| H  | -4.83936400 | -0.15032400 | 0.62216800  |
| H  | 4.56518200  | -1.15229500 | 0.37646100  |
| H  | -1.81032300 | -1.40419100 | 0.50856300  |
| H  | -2.52841800 | -1.98010800 | 2.03565100  |
| H  | -0.25109100 | -2.65101300 | 2.83423000  |

|   |             |             |             |
|---|-------------|-------------|-------------|
| H | -0.79069500 | -3.46377100 | 1.38852800  |
| H | 1.21585500  | -1.14893700 | 1.54692900  |
| H | 1.64487100  | -2.87666400 | 1.40287900  |
| H | -0.49578900 | -0.80595800 | 3.89628800  |
| H | -2.28386800 | -0.75837000 | 4.02873300  |
| H | -0.34465900 | 1.63141300  | 3.96713600  |
| H | -1.25554300 | 1.05859300  | 5.37887500  |
| H | -3.40107700 | 1.68050900  | 4.32522900  |
| H | -2.32602400 | 3.08845300  | 4.24074700  |
| H | -1.75375900 | 2.54205400  | 1.86958700  |
| H | -3.52303100 | 2.62963900  | 2.04309900  |
| H | -3.57312100 | 0.12795600  | 2.31134700  |
| H | -5.44755100 | 1.99618500  | -4.18036300 |
| H | -5.55028200 | -0.26646100 | -5.18910400 |
| H | -5.03404700 | -2.27148400 | -3.81627800 |
| H | -4.60260400 | 2.60547200  | -0.55234000 |
| H | -2.70869600 | 2.97341400  | -2.13479500 |
| H | -3.57092900 | 4.49398500  | -1.77858600 |
| H | -3.83528600 | 3.66774900  | -3.33283400 |
| H | -6.97499200 | 2.87276900  | -1.29623400 |
| H | -6.41719600 | 3.62115300  | -2.81397800 |
| H | -6.09771500 | 4.42427400  | -1.26085600 |
| H | -4.07529900 | -2.07495300 | -0.16490600 |
| H | -2.16225700 | -2.37350100 | -1.71294400 |
| H | -3.14800900 | -3.43399800 | -2.75571900 |
| H | -2.75606800 | -3.93606300 | -1.09436300 |
| H | -5.21406500 | -4.21082900 | -0.44648000 |
| H | -5.75756400 | -3.76048800 | -2.08780400 |
| H | -6.34917100 | -2.86541700 | -0.65719700 |
| H | -0.31978000 | -3.63850700 | -0.68907300 |
| H | 1.43017300  | -4.02311500 | -0.62109900 |
| H | 0.58071100  | -4.24270900 | -2.93745200 |
| H | -0.06856800 | -2.59318200 | -2.89339900 |
| H | 2.09865000  | -2.52195300 | -4.08944600 |
| H | 2.90388900  | -3.40131200 | -2.77205000 |
| H | 3.43927300  | -1.03178600 | -2.52402100 |
| H | 1.71358900  | -0.57671700 | -2.56710100 |
| H | 2.99308500  | -2.36663300 | -0.45416600 |
| H | 6.19264600  | 3.76426100  | 0.03193000  |
| H | 6.24475100  | 4.06251400  | 2.48654900  |

|    |             |             |             |
|----|-------------|-------------|-------------|
| H  | 5.27496900  | 2.34676200  | 3.98395700  |
| H  | 4.21717200  | 1.11645500  | -1.65085200 |
| H  | 6.23775900  | -0.29738700 | -1.30145500 |
| H  | 7.28469200  | 1.12189400  | -1.58127000 |
| H  | 6.27158600  | 0.47227900  | -2.89862300 |
| H  | 5.03425000  | 2.67975500  | -3.29797500 |
| H  | 6.16234700  | 3.43227100  | -2.15520400 |
| H  | 4.40514000  | 3.61561300  | -1.91841200 |
| H  | 2.55859000  | 1.36270600  | 4.20479200  |
| H  | 5.85334900  | -0.55744100 | 4.32174800  |
| H  | 4.83203100  | 0.57965400  | 5.24031600  |
| H  | 4.36037000  | -1.12509300 | 5.11205400  |
| H  | 1.94879900  | 0.57621800  | 2.73028100  |
| H  | 2.06651900  | -0.34927300 | 4.24518100  |
| H  | 2.16231400  | 1.65926900  | -2.58247000 |
| H  | 1.31312800  | 3.19036100  | -2.25563000 |
| H  | 0.30636100  | 3.22027100  | -4.47241600 |
| H  | 1.87524100  | 2.46668300  | -4.87037200 |
| H  | 0.90818900  | 0.20693200  | -4.66027600 |
| H  | -0.40829800 | 1.08559900  | -5.48205600 |
| H  | -1.61723600 | 1.41475700  | -3.39591000 |
| H  | -0.84997000 | -0.15738000 | -3.02287600 |
| H  | -1.68198000 | 3.73464800  | -0.03209100 |
| H  | 2.07700500  | 3.52444700  | 0.86844100  |
| H  | -0.58649300 | 4.01246400  | -1.40868500 |
| H  | 0.66704100  | 5.70479400  | -0.20999500 |
| H  | -0.93808000 | 5.98756900  | 0.51568100  |
| H  | -0.40459600 | 4.49057900  | 2.40811400  |
| H  | 1.13831700  | 5.36012100  | 2.18625000  |
| H  | 1.06662800  | 2.59171800  | 2.01181900  |
| Cl | 5.39456100  | -3.54535700 | -0.77375900 |
| O  | 6.59958600  | -4.39816600 | -0.83919200 |
| O  | 5.47024500  | -2.67448200 | 0.46394200  |
| O  | 5.30853800  | -2.66063900 | -1.97206800 |
| O  | 4.16472700  | -4.39212100 | -0.67789100 |
| H  | 3.94190500  | -0.94289300 | 2.72257900  |

**Co(II)-L<sub>3</sub>-RaPr<sub>2</sub>**

|    |             |             |             |
|----|-------------|-------------|-------------|
| Co | 0.07347800  | 0.06140100  | 0.44756700  |
| O  | -0.45912800 | -1.40441300 | -0.84831400 |

|   |             |             |             |
|---|-------------|-------------|-------------|
| O | 0.65479600  | 1.40011800  | -0.94231200 |
| O | 2.06596700  | -0.56911900 | 0.59112500  |
| O | -1.96942300 | 0.61533800  | 0.47100300  |
| O | 0.46254100  | 1.60982700  | 1.87836000  |
| O | -0.21111200 | -1.19484100 | 2.13956200  |
| N | -1.44515700 | -1.21890700 | -1.79650400 |
| C | -2.91134900 | 0.17080800  | -0.20948700 |
| N | 1.70434800  | 1.14975500  | -1.79859200 |
| C | 3.05237500  | -0.14866700 | -0.03586000 |
| C | -1.16037700 | -0.04729800 | -2.70724700 |
| C | -2.80336600 | -1.03030200 | -1.13750600 |
| C | -1.66732300 | -2.55695300 | -2.54655400 |
| N | -4.14520700 | 0.68044200  | -0.14854200 |
| C | -4.56921800 | 1.67228800  | 0.79401300  |
| C | 1.46476800  | -0.07428300 | -2.65062800 |
| C | 3.01170500  | 0.98898700  | -1.03796300 |
| C | 1.99690500  | 2.44158800  | -2.60524700 |
| N | 4.28131900  | -0.62849700 | 0.17279700  |
| C | 4.57699200  | -1.57865200 | 1.20407200  |
| C | 0.16911000  | -0.08218100 | -3.45378800 |
| C | -0.41849900 | -3.43688500 | -2.65516300 |
| C | -2.69034500 | -3.34337200 | -1.66963400 |
| C | -0.49160400 | -4.39070000 | -1.45383200 |
| C | -1.99409500 | -4.66690200 | -1.29338900 |
| C | -3.04263200 | -2.39601200 | -0.50640700 |
| C | -4.12075500 | 3.00544600  | 0.66088500  |
| C | -5.47076000 | 1.26883100  | 1.80406600  |
| C | -5.85460000 | 2.22831700  | 2.75316800  |
| C | -6.00358100 | -0.16266600 | 1.84684300  |
| C | -5.36965700 | 3.53445400  | 2.68524600  |
| C | -4.52593900 | 3.92239100  | 1.64220500  |
| C | -3.30036000 | 3.43376600  | -0.55434300 |
| C | -4.98043200 | -1.11911300 | 2.48265000  |
| C | -4.16660700 | 3.40742300  | -1.83013600 |
| C | 0.77201700  | 3.33340800  | -2.83087000 |
| C | 2.98086700  | 3.25992800  | -1.71021300 |
| C | 0.79683200  | 4.34851000  | -1.67789000 |
| C | 2.29372400  | 4.61662100  | -1.46312400 |
| C | 3.22499400  | 2.38394100  | -0.46670300 |
| C | 4.63664600  | -2.94666100 | 0.87333200  |

|    |             |             |             |
|----|-------------|-------------|-------------|
| C  | 4.80341200  | -1.09889300 | 2.51320700  |
| C  | 4.91786000  | -3.85484200 | 1.90627600  |
| C  | 5.13084400  | -3.40812900 | 3.21054700  |
| C  | 5.07664400  | -2.04441800 | 3.51173400  |
| C  | 4.77686400  | 0.40068100  | 2.79474400  |
| C  | 6.07115200  | 1.07546300  | 2.29975300  |
| C  | 4.34859400  | -3.41506300 | -0.54868000 |
| C  | 2.84437300  | -3.69567000 | -0.72454700 |
| Cl | 6.54443300  | 1.41761600  | -2.14815400 |
| O  | 6.39333000  | 2.50948000  | -1.14514100 |
| O  | 7.86059200  | 1.50628800  | -2.81520400 |
| O  | 5.44726200  | 1.49770700  | -3.16391900 |
| O  | 6.44445400  | 0.08106900  | -1.44304800 |
| Cl | -6.40051400 | -1.58173600 | -2.16398500 |
| O  | -6.31571200 | -2.39794000 | -0.91735500 |
| O  | -5.31093400 | -1.97365500 | -3.10910200 |
| O  | -7.72101700 | -1.75514700 | -2.80353000 |
| O  | -6.21719000 | -0.11968200 | -1.80927500 |
| C  | -1.28437700 | -1.09216000 | 3.09743700  |
| C  | 0.35626400  | -2.52789800 | 2.14601300  |
| C  | 1.08946000  | 1.46456000  | 3.16430900  |
| C  | -0.31080600 | 2.81690100  | 1.90339100  |
| C  | -0.37211700 | -3.27223400 | 3.26490500  |
| C  | -1.71478900 | -2.53151300 | 3.34458800  |
| C  | 0.15831800  | 2.18153100  | 4.17002600  |
| C  | -0.95406300 | 2.79045700  | 3.28480900  |
| H  | -4.87786000 | 0.27466900  | -0.75431200 |
| H  | 5.06079300  | -0.29185100 | -0.41675600 |
| H  | -1.20433700 | 0.83833600  | -2.06755500 |
| H  | -1.98551100 | -0.01450400 | -3.43090400 |
| H  | 0.15382500  | 0.77483400  | -4.14521400 |
| H  | 0.21170800  | -0.97517800 | -4.09691400 |
| H  | 1.47877500  | -0.92039000 | -1.95781400 |
| H  | 2.32350500  | -0.14855100 | -3.33199200 |
| H  | -2.08119500 | -2.27393300 | -3.52197600 |
| H  | -0.50760300 | -4.00531700 | -3.59598500 |
| H  | 0.51603400  | -2.86590400 | -2.69837500 |
| H  | 0.10264000  | -5.30588500 | -1.59940400 |
| H  | -0.10528600 | -3.87204900 | -0.56740900 |
| H  | -2.26601300 | -5.00419000 | -0.28056900 |

|   |             |             |             |
|---|-------------|-------------|-------------|
| H | -2.30724600 | -5.45813100 | -1.99440600 |
| H | -3.60860200 | -3.51205700 | -2.24561100 |
| H | -4.08411200 | -2.49994800 | -0.18407900 |
| H | -2.36910900 | -2.52167100 | 0.35111000  |
| H | -3.51953200 | -0.89848700 | -1.95984100 |
| H | -6.54123200 | 1.95389400  | 3.55505700  |
| H | -5.67071200 | 4.26610800  | 3.43991100  |
| H | -4.19235100 | 4.95904900  | 1.59049100  |
| H | -6.15535100 | -0.49040700 | 0.80707000  |
| H | -5.35340400 | -2.15588000 | 2.46207100  |
| H | -4.78709200 | -0.84565200 | 3.53326700  |
| H | -4.02181100 | -1.10132200 | 1.94939600  |
| H | -2.49297300 | 2.69661200  | -0.68410100 |
| H | -3.55098400 | 3.63707500  | -2.71577200 |
| H | -4.96722500 | 4.16322300  | -1.77010300 |
| H | -4.64020100 | 2.42833800  | -1.99390700 |
| H | 2.46361300  | 2.09992600  | -3.53664600 |
| H | -0.16819000 | 2.77342800  | -2.89995400 |
| H | 0.92466700  | 3.85126200  | -3.79250700 |
| H | 0.22746600  | 5.26294500  | -1.90354300 |
| H | 0.35990500  | 3.88354000  | -0.78311800 |
| H | 2.52386700  | 5.02044200  | -0.46452200 |
| H | 2.65267800  | 5.35157500  | -2.20251400 |
| H | 3.94156500  | 3.36880700  | -2.22931700 |
| H | 2.48766800  | 2.56505800  | 0.32757000  |
| H | 4.24258000  | 2.49398600  | -0.07561100 |
| H | 3.77429400  | 0.80369600  | -1.80581400 |
| H | 4.96849200  | -4.92372000 | 1.69036100  |
| H | 5.34574100  | -4.12974000 | 4.00348800  |
| H | 5.25449100  | -1.71902900 | 4.53782800  |
| H | 3.94294900  | 0.82424500  | 2.21273400  |
| H | 6.02139100  | 2.16598900  | 2.45481000  |
| H | 6.25414900  | 0.90279700  | 1.22908500  |
| H | 6.94356200  | 0.69401400  | 2.85626600  |
| H | 4.61116300  | -2.58520400 | -1.22357400 |
| H | 2.62074300  | -3.97476000 | -1.76680200 |
| H | 2.22951900  | -2.82386400 | -0.46130700 |
| H | 2.53051300  | -4.53118500 | -0.07712500 |
| H | 1.44061000  | -2.44503400 | 2.29420900  |
| H | 0.17196800  | -2.96365600 | 1.15409700  |

|   |             |             |             |
|---|-------------|-------------|-------------|
| H | -0.47619600 | -4.34519600 | 3.04681600  |
| H | 0.17547900  | -3.16725300 | 4.21570400  |
| H | -2.39189300 | -2.86849400 | 2.54406300  |
| H | -2.23133200 | -2.65665500 | 4.30732700  |
| H | -2.05681500 | -0.44447200 | 2.66723000  |
| H | -0.89883500 | -0.62504900 | 4.02016200  |
| H | 2.08455200  | 1.93617500  | 3.12771600  |
| H | 1.21440300  | 0.38989500  | 3.34019400  |
| H | 0.71044800  | 2.96419700  | 4.71156000  |
| H | -0.25115300 | 1.48596300  | 4.91629600  |
| H | -1.83504800 | 2.13140000  | 3.25610300  |
| H | -1.28107700 | 3.78540300  | 3.61992900  |
| H | -1.01520700 | 2.77807900  | 1.06800300  |
| H | 0.36105000  | 3.68589600  | 1.77549200  |
| C | 5.18416500  | -4.62869200 | -0.97464600 |
| H | 5.02865900  | -4.83557000 | -2.04583100 |
| H | 6.26073900  | -4.45774900 | -0.81501300 |
| H | 4.89839300  | -5.54003400 | -0.42441900 |
| C | 4.51143600  | 0.74956200  | 4.26269600  |
| H | 4.37481900  | 1.83716100  | 4.37196000  |
| H | 3.60346800  | 0.25459400  | 4.64193900  |
| H | 5.35338500  | 0.46203000  | 4.91330500  |
| C | -7.36411500 | -0.29158600 | 2.54152600  |
| H | -8.10259700 | 0.41126100  | 2.12382700  |
| H | -7.75443200 | -1.31248600 | 2.40301600  |
| H | -7.29697000 | -0.11165900 | 3.62716600  |
| C | -2.63774500 | 4.80675400  | -0.40651800 |
| H | -2.00536900 | 4.86945700  | 0.49246300  |
| H | -2.00136000 | 5.00788200  | -1.28031200 |
| H | -3.38395500 | 5.61609800  | -0.35540900 |

**Co(II)-L<sub>3</sub>-TQPr<sub>2</sub>**

|    |             |             |             |
|----|-------------|-------------|-------------|
| Co | -0.03826100 | 0.09326200  | 0.89036100  |
| O  | 0.41801600  | 1.43026900  | -0.51881300 |
| O  | -0.33747200 | -1.50424300 | -0.24220500 |
| O  | 1.98224700  | -0.26903400 | 1.29473900  |
| O  | -2.05286600 | 0.57866900  | 0.62829500  |
| N  | -1.29649600 | -1.49540900 | -1.24857500 |
| C  | -2.91021500 | 0.03550700  | -0.09097600 |
| N  | 1.55842500  | 1.23783700  | -1.27857600 |

|    |             |             |             |
|----|-------------|-------------|-------------|
| C  | 2.89133900  | 0.01025100  | 0.48344300  |
| C  | -1.07828600 | -0.37121100 | -2.25291300 |
| C  | -1.22205800 | -2.82833400 | -1.94622300 |
| C  | -2.69847300 | -1.36680900 | -0.64955200 |
| N  | -4.07589600 | 0.61943000  | -0.34852700 |
| C  | 2.80434900  | 1.26401100  | -0.38960500 |
| C  | 1.65845900  | 2.39989900  | -2.23219500 |
| C  | 1.52514900  | -0.07661200 | -2.04391400 |
| N  | 4.01090100  | -0.69702800 | 0.37154200  |
| C  | 0.29609100  | -0.31146600 | -2.91497400 |
| C  | -1.63823100 | -3.97786800 | -1.06648600 |
| C  | -2.44745200 | -3.78098600 | 0.06087600  |
| C  | -1.22340000 | -5.27235500 | -1.41406300 |
| C  | -1.60884100 | -6.37091500 | -0.64554800 |
| C  | -2.41025400 | -6.17715500 | 0.48651800  |
| C  | -2.82369600 | -4.89038500 | 0.83279900  |
| C  | -2.87919600 | -2.39552700 | 0.46484100  |
| C  | 1.84755500  | 3.71141400  | -1.51470300 |
| C  | 2.42373500  | 3.76494300  | -0.23562300 |
| C  | 1.48596900  | 4.89984900  | -2.16585400 |
| C  | 1.69669400  | 6.13746300  | -1.55500200 |
| C  | 2.27030300  | 6.19381200  | -0.27915200 |
| C  | 2.62654100  | 5.01244600  | 0.37357200  |
| C  | 2.75175200  | 2.49596000  | 0.50864500  |
| Cl | -6.23468300 | -2.12552200 | -1.18282800 |
| O  | -7.59279800 | -2.47185700 | -1.65227000 |
| O  | -5.73806400 | -0.92102700 | -1.96637700 |
| O  | -5.29435000 | -3.25771700 | -1.41260800 |
| O  | -6.25845200 | -1.76747700 | 0.26826400  |
| Cl | 5.39761900  | 0.10143200  | -2.94287300 |
| O  | 5.80934700  | 0.37182400  | -1.50649300 |
| O  | 4.61395000  | -1.16758900 | -2.98411100 |
| O  | 6.60913200  | -0.00124100 | -3.77874700 |
| O  | 4.53775300  | 1.23417200  | -3.40627800 |
| H  | -4.77011200 | 0.12289800  | -0.93308300 |
| H  | 4.69822700  | -0.37334400 | -0.32875700 |
| H  | -1.25830500 | 0.56050000  | -1.71519500 |
| H  | -1.85468200 | -0.50220000 | -3.01836600 |
| H  | 0.21572900  | 0.46941200  | -3.68693900 |
| H  | 0.50329000  | -1.23805000 | -3.47191900 |



|   |             |             |             |
|---|-------------|-------------|-------------|
| H | 1.58893900  | -0.86748500 | -1.29323300 |
| H | 2.43582700  | -0.10031400 | -2.65486900 |
| H | -1.86077700 | -2.76084500 | -2.83944600 |
| H | -0.17989400 | -2.94327600 | -2.26457700 |
| H | -0.58592300 | -5.41468500 | -2.29140400 |
| H | -1.27973700 | -7.37522700 | -0.92377000 |
| H | -2.71437800 | -7.03098800 | 1.09755600  |
| H | -3.45343100 | -4.73511700 | 1.71333900  |
| H | -2.31096600 | -2.06854800 | 1.34951100  |
| H | -3.94549500 | -2.39627200 | 0.73008400  |
| H | -3.39869900 | -1.56614800 | -1.46921700 |
| H | 2.49952100  | 2.19014000  | -2.90865200 |
| H | 0.72589000  | 2.40109400  | -2.80679200 |
| H | 1.03310500  | 4.85116800  | -3.16001300 |
| H | 1.41150400  | 7.05672700  | -2.07273800 |
| H | 2.43714300  | 7.15810600  | 0.20776900  |
| H | 3.07105800  | 5.05146000  | 1.37228200  |
| H | 1.99329100  | 2.32575100  | 1.28592300  |
| H | 3.72298900  | 2.58217900  | 1.01975900  |
| H | 3.65808600  | 1.31503500  | -1.07307900 |
| C | -4.41366900 | 1.87575800  | 0.25915700  |
| C | -4.86526100 | 1.88498000  | 1.59591200  |
| C | -4.22550100 | 3.05892500  | -0.48471600 |
| C | -5.13635100 | 3.13027300  | 2.18227900  |
| C | -4.51504200 | 4.27924100  | 0.14400600  |
| C | -4.96498700 | 4.31544400  | 1.46483200  |
| H | -5.48003000 | 3.17238700  | 3.21842000  |
| H | -4.37319700 | 5.21408300  | -0.40269900 |
| H | -5.17957900 | 5.27599200  | 1.94128700  |
| C | 4.43336000  | -1.74643200 | 1.25638200  |
| C | 5.59448400  | -1.50125700 | 2.02254200  |
| C | 3.73285300  | -2.97515200 | 1.31148000  |
| C | 6.05785900  | -2.52746600 | 2.85985600  |
| C | 4.23172300  | -3.95884300 | 2.17812400  |
| C | 5.38178500  | -3.74254600 | 2.94035500  |
| H | 6.95851700  | -2.36891600 | 3.45670400  |
| H | 3.72242100  | -4.92004600 | 2.25361400  |
| H | 5.75256900  | -4.53150100 | 3.60032100  |
| C | 2.52651200  | -3.25117000 | 0.41861300  |
| C | 1.61266300  | -4.36683400 | 0.93584200  |

|   |             |             |             |
|---|-------------|-------------|-------------|
| C | 2.97661500  | -3.53836600 | -1.02518100 |
| H | 1.90781100  | -2.34660700 | 0.39829500  |
| H | 1.30833100  | -4.19274100 | 1.98063600  |
| H | 0.69870500  | -4.40692300 | 0.32727300  |
| H | 2.08772900  | -5.35995900 | 0.87912200  |
| H | 3.60383600  | -2.73222400 | -1.43263600 |
| H | 3.55629900  | -4.47564200 | -1.07515300 |
| H | 2.09929800  | -3.65122400 | -1.68431400 |
| C | 6.36024200  | -0.18402400 | 1.93669400  |
| C | 7.65364100  | -0.36166600 | 1.12246700  |
| C | 6.64550300  | 0.42105000  | 3.31975800  |
| H | 5.73462300  | 0.54222600  | 1.39808000  |
| H | 7.43613200  | -0.72378900 | 0.10659500  |
| H | 8.18658900  | 0.59909100  | 1.02781700  |
| H | 8.33185300  | -1.08020000 | 1.61230700  |
| H | 5.71922300  | 0.54487300  | 3.90416700  |
| H | 7.33604700  | -0.20315900 | 3.90959200  |
| H | 7.11328500  | 1.41321900  | 3.21078000  |
| C | -3.65172700 | 3.02559700  | -1.89611400 |
| C | -2.15842000 | 3.40239500  | -1.87172400 |
| C | -4.43359600 | 3.90519800  | -2.88118900 |
| H | -3.72288700 | 1.98865900  | -2.25802500 |
| H | -1.58194200 | 2.76340100  | -1.18645900 |
| H | -1.71821600 | 3.30529200  | -2.87869600 |
| H | -2.02306900 | 4.44771200  | -1.54700000 |
| H | -5.50309300 | 3.64042600  | -2.89662100 |
| H | -4.35311800 | 4.97551400  | -2.63037900 |
| H | -4.03748400 | 3.77851600  | -3.90225300 |
| C | -5.00860900 | 0.60007500  | 2.40362800  |
| C | -6.39822800 | 0.46376500  | 3.04208100  |
| C | -3.88857700 | 0.48606100  | 3.45380700  |
| H | -4.90585500 | -0.24439800 | 1.70983200  |
| H | -7.19140100 | 0.52163200  | 2.28012200  |
| H | -6.48956300 | -0.51201500 | 3.54689300  |
| H | -6.58825000 | 1.24555300  | 3.79604000  |
| H | -2.89384000 | 0.53479800  | 2.98580800  |
| H | -3.95665300 | 1.29848100  | 4.19733800  |
| H | -3.96635400 | -0.47124600 | 3.99603700  |
| O | -0.20738100 | 1.31921300  | 2.53903800  |
| C | 0.61442500  | 1.26571700  | 3.73222200  |

|   |             |            |            |
|---|-------------|------------|------------|
| C | -0.77355300 | 2.65190900 | 2.35394900 |
| H | 1.50797400  | 0.67234200 | 3.49682900 |
| H | 0.04039300  | 0.75902900 | 4.52654800 |
| C | 0.89048500  | 2.72443300 | 4.07062500 |
| H | 1.11965100  | 2.86861100 | 5.13636500 |
| H | 1.74283600  | 3.09651700 | 3.47950400 |
| C | -0.40998000 | 3.40890300 | 3.62673300 |
| H | -1.19372700 | 3.27334000 | 4.38989300 |
| H | -0.29314700 | 4.48643700 | 3.44141900 |
| H | -0.31090700 | 3.08146000 | 1.45189300 |
| H | -1.85082200 | 2.54357100 | 2.17921800 |

**Co(II)-L<sub>3</sub>-PePr<sub>2</sub>**

|    |             |             |             |
|----|-------------|-------------|-------------|
| Co | 0.00451200  | 0.56504900  | 0.60168400  |
| O  | 0.43138200  | 1.41823600  | -1.17800600 |
| O  | 2.04968700  | 0.49448200  | 1.00478300  |
| O  | -0.10402700 | -1.35171900 | -0.03049700 |
| O  | -2.05923200 | 0.67489700  | 0.32449800  |
| N  | 1.55547200  | 1.08046500  | -1.90028000 |
| N  | 4.21004600  | 0.18819100  | 0.44417200  |
| H  | 4.89874200  | 0.16853300  | -0.32402300 |
| N  | -1.04617000 | -1.74508500 | -0.95907300 |
| N  | -4.17762100 | 0.00141400  | -0.00970700 |
| H  | -4.80912000 | -0.77997400 | -0.24496900 |
| C  | 1.57809500  | -0.37644600 | -2.30627200 |
| H  | 1.74319200  | -0.93222900 | -1.37780500 |
| H  | 2.45523500  | -0.50339300 | -2.94989800 |
| C  | 0.33998300  | -0.92378700 | -3.00113100 |
| H  | 0.13942100  | -0.36702400 | -3.92669700 |
| H  | 0.61074800  | -1.93520700 | -3.33376800 |
| C  | -0.98408500 | -0.95367600 | -2.25023200 |
| H  | -1.26675400 | 0.06611900  | -1.97503000 |
| H  | -1.76010300 | -1.38022500 | -2.89993700 |
| C  | 1.69798800  | 2.09878300  | -3.04980800 |
| H  | 2.48743500  | 1.68529900  | -3.69191400 |
| C  | 0.41965300  | 2.33363100  | -3.85076900 |
| H  | -0.44120000 | 2.32309000  | -3.16740300 |
| H  | 0.27375400  | 1.53439500  | -4.58997200 |
| C  | 0.51473900  | 3.68915200  | -4.56623700 |
| H  | 1.41729900  | 3.68486700  | -5.20167400 |

|   |             |             |             |
|---|-------------|-------------|-------------|
| H | -0.34038300 | 3.80311500  | -5.25072100 |
| C | 0.57566500  | 4.87263100  | -3.57387500 |
| H | -0.43019100 | 5.30129100  | -3.43148900 |
| H | 1.19749700  | 5.67623200  | -4.00206600 |
| C | 1.13234300  | 4.44559600  | -2.20423700 |
| H | 1.52672700  | 5.31722300  | -1.65658200 |
| H | 0.32876200  | 4.01779100  | -1.58725900 |
| C | 2.22307400  | 3.38045400  | -2.33414900 |
| H | 3.04718100  | 3.77990000  | -2.94534100 |
| C | 2.77373300  | 2.90085400  | -0.97085800 |
| H | 3.76631600  | 3.30599600  | -0.73508200 |
| H | 2.08018200  | 3.15567400  | -0.15906300 |
| C | 2.83178600  | 1.38560500  | -1.12101600 |
| H | 3.65542400  | 1.11368600  | -1.78962300 |
| C | 2.97385500  | 0.62426400  | 0.18544500  |
| C | 4.56133400  | -0.39623800 | 1.70470800  |
| C | 4.69054800  | -1.79527900 | 1.79477600  |
| C | 5.05218100  | -2.33778700 | 3.03922300  |
| H | 5.17293600  | -3.41857900 | 3.14019700  |
| C | 5.25181900  | -1.51637500 | 4.14722200  |
| H | 5.52766400  | -1.95662300 | 5.10934700  |
| C | 5.09780800  | -0.13054400 | 4.03730200  |
| H | 5.25504800  | 0.49443700  | 4.91776400  |
| C | 4.75273100  | 0.45970200  | 2.81469200  |
| C | 4.47000800  | -2.69239900 | 0.58395700  |
| H | 3.96173000  | -2.10058600 | -0.18891100 |
| C | 5.81524500  | -3.13257300 | -0.01793400 |
| H | 6.40858300  | -2.26156700 | -0.33486100 |
| H | 5.65104800  | -3.75687200 | -0.91004500 |
| H | 6.40534000  | -3.71282200 | 0.71175500  |
| C | 3.56901800  | -3.89571400 | 0.89713200  |
| H | 2.60718600  | -3.57496400 | 1.32717800  |
| H | 4.03963400  | -4.59729600 | 1.60536500  |
| H | 3.35553200  | -4.45766500 | -0.02545300 |
| C | 4.62270500  | 1.97198200  | 2.65538900  |
| H | 3.78169300  | 2.15703500  | 1.97146700  |
| C | 4.28831400  | 2.71093100  | 3.95529900  |
| H | 4.08289800  | 3.77217100  | 3.74095500  |
| H | 5.12072700  | 2.68121800  | 4.67717200  |
| H | 3.39760200  | 2.28670200  | 4.44572300  |

|   |             |             |             |
|---|-------------|-------------|-------------|
| C | 5.88617600  | 2.55459300  | 1.99650300  |
| H | 5.76574100  | 3.63460500  | 1.80905200  |
| H | 6.10187600  | 2.06555500  | 1.03388200  |
| H | 6.76524000  | 2.41740600  | 2.64792300  |
| C | -0.94425500 | -3.27799400 | -1.12420300 |
| H | -1.55439300 | -3.50322800 | -2.00989900 |
| C | 0.47884900  | -3.80045400 | -1.30008000 |
| H | 1.15185100  | -3.24084700 | -0.63753400 |
| H | 0.82652200  | -3.65020000 | -2.33061100 |
| C | 0.51244600  | -5.29563300 | -0.95221100 |
| H | 1.50527200  | -5.70380300 | -1.19693800 |
| H | -0.20383400 | -5.82271300 | -1.60595900 |
| C | 0.16716600  | -5.56380600 | 0.53159800  |
| H | -0.39299300 | -6.51032300 | 0.61027200  |
| H | 1.08972300  | -5.69866600 | 1.11941700  |
| C | -0.65427200 | -4.41681400 | 1.14563200  |
| H | 0.01379700  | -3.60285700 | 1.46509900  |
| H | -1.18782400 | -4.76219400 | 2.04627700  |
| C | -1.65410200 | -3.83714000 | 0.14361000  |
| H | -2.33478800 | -4.63144400 | -0.19512100 |
| C | -2.49118600 | -2.66936300 | 0.70893800  |
| H | -3.53076500 | -2.95153400 | 0.91531700  |
| H | -2.03492100 | -2.25913000 | 1.61908800  |
| C | -2.45446900 | -1.62600700 | -0.39987600 |
| H | -3.10957600 | -1.93773400 | -1.21876900 |
| C | -2.85918800 | -0.21738600 | -0.00028800 |
| C | -4.73390900 | 1.25144700  | 0.41553600  |
| C | -5.30412000 | 1.32823300  | 1.70243100  |
| C | -5.84524100 | 2.55930800  | 2.10528100  |
| H | -6.30154300 | 2.65398800  | 3.09259300  |
| C | -5.79920600 | 3.66815800  | 1.26022000  |
| H | -6.22114200 | 4.62125900  | 1.59059300  |
| C | -5.21004400 | 3.57227700  | -0.00362500 |
| H | -5.17920500 | 4.45506200  | -0.64395300 |
| C | -4.66382800 | 2.36245300  | -0.45473200 |
| C | -5.35052600 | 0.10095800  | 2.60498600  |
| H | -4.52271600 | -0.55725900 | 2.29881800  |
| C | -6.65846100 | -0.68004300 | 2.38517400  |
| H | -6.78077600 | -0.97528500 | 1.33207000  |
| H | -7.52961500 | -0.06709400 | 2.67147100  |

|   |             |             |             |
|---|-------------|-------------|-------------|
| C | -5.13840000 | 0.42655700  | 4.08904700  |
| H | -4.22523200 | 1.02264400  | 4.24632200  |
| H | -5.04133800 | -0.50523100 | 4.66929400  |
| H | -5.98628900 | 0.98700800  | 4.51525300  |
| C | -4.04848900 | 2.22296800  | -1.84518000 |
| H | -3.17501900 | 1.56139200  | -1.75263600 |
| C | -5.04221800 | 1.54565800  | -2.80688400 |
| H | -5.34230200 | 0.54820600  | -2.45226800 |
| H | -4.58854600 | 1.41677200  | -3.80393100 |
| H | -5.95010800 | 2.16071700  | -2.92450500 |
| C | -3.52796300 | 3.54153700  | -2.42848200 |
| H | -2.84059200 | 4.04898500  | -1.73287000 |
| H | -4.34419100 | 4.24051000  | -2.67321800 |
| H | -2.97796100 | 3.34629200  | -3.36312300 |
| O | -0.19979700 | 2.46223800  | 1.50648500  |
| O | -0.22828000 | -0.08557100 | 2.61508700  |
| C | -1.09496700 | 3.47586800  | 1.00479700  |
| H | -2.10578200 | 3.28311700  | 1.39898100  |
| H | -1.12380700 | 3.38345100  | -0.08893700 |
| C | -0.51224300 | 4.78735700  | 1.51681500  |
| H | 0.27858600  | 5.14180800  | 0.83538500  |
| H | -1.27206500 | 5.57746100  | 1.60630300  |
| C | 0.09353700  | 4.36085800  | 2.86237200  |
| H | 0.86070500  | 5.05306800  | 3.23913000  |
| H | -0.69750200 | 4.27393400  | 3.62563400  |
| C | 0.66690300  | 2.98524500  | 2.53252000  |
| H | 1.69064500  | 3.04926800  | 2.12995500  |
| H | 0.67135800  | 2.27689200  | 3.37315500  |
| C | -1.42629400 | 0.12165400  | 3.39013600  |
| H | -2.28869000 | -0.25078100 | 2.81550700  |
| H | -1.55683000 | 1.20266500  | 3.54312500  |
| C | -1.20750800 | -0.67799900 | 4.67152300  |
| H | -0.66187700 | -0.07213900 | 5.41349300  |
| H | -2.15495000 | -1.00529200 | 5.12367900  |
| C | -0.32774700 | -1.83645700 | 4.17966900  |
| H | -0.94240000 | -2.59447200 | 3.66856400  |
| H | 0.23508300  | -2.33342500 | 4.98318500  |
| C | 0.58409200  | -1.13767000 | 3.17841500  |
| H | 1.46199700  | -0.68404900 | 3.66715700  |
| H | 0.93051600  | -1.77248400 | 2.35234900  |

|    |             |             |             |
|----|-------------|-------------|-------------|
| Cl | -5.44955800 | -2.98288700 | -1.81463000 |
| O  | -4.46746100 | -4.08326100 | -1.59924300 |
| O  | -6.71591400 | -3.51169000 | -2.36240600 |
| O  | -4.85983300 | -1.96572600 | -2.74272000 |
| O  | -5.72487700 | -2.31075000 | -0.48352000 |
| Cl | 5.42411600  | -0.67955400 | -2.98289100 |
| O  | 4.49850400  | -1.78068400 | -2.58988400 |
| O  | 6.55124800  | -1.20744300 | -3.77831000 |
| O  | 4.66955200  | 0.34968100  | -3.76823100 |
| O  | 5.97396600  | -0.01487300 | -1.73726900 |
| H  | -6.67230000 | -1.59867000 | 2.99543000  |

## 9. Substrates scope limitation

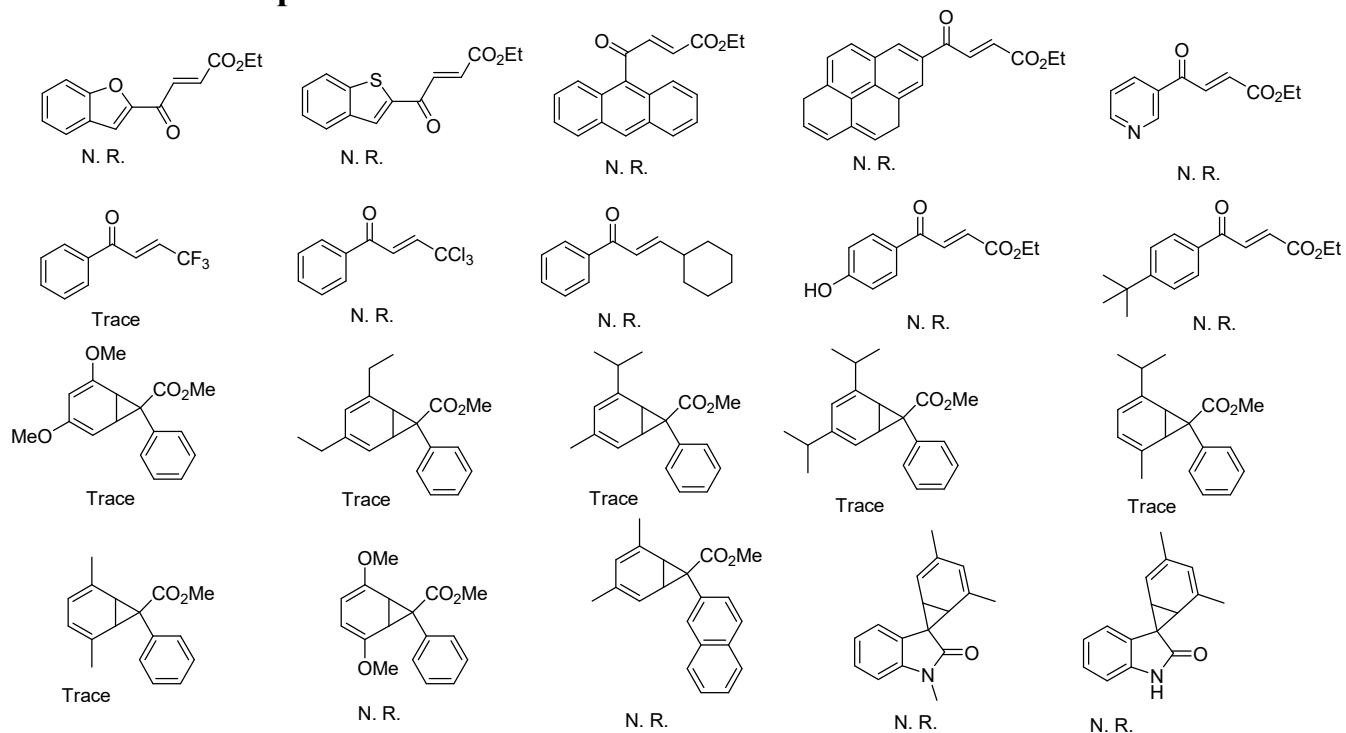



## 10. Analysis Results of 2D NMR Spectra of the Product 3aa

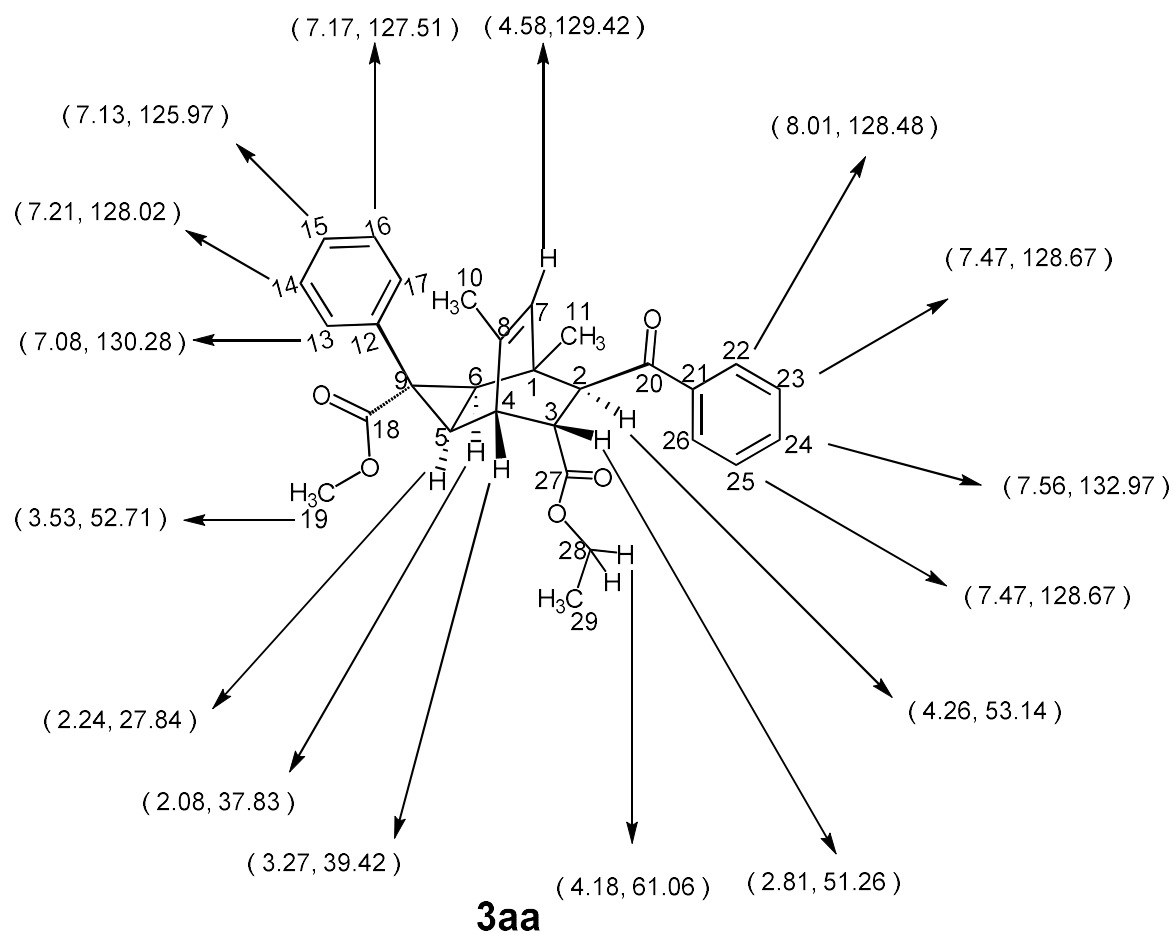

| Number of Atom | H        | C      | Number of Atom | H        | C      |
|----------------|----------|--------|----------------|----------|--------|
| 1              | —        | 41.57  | 16             | 7.17 (m) | 127.51 |
| 2              | 4.26 (d) | 53.14  | 17             | 6.93 (d) | 131.23 |
| 3              | 2.81 (d) | 51.26  | 18             | —        | 174.3  |
| 4              | 3.27     | 39.42  | 19             | 3.53     | 52.71  |
| 5              | 2.24 (m) | 27.84  | 20             | —        | 201.97 |
| 6              | 2.08 (d) | 37.83  | 21             | —        | 139.28 |
| 7              | 4.58     | 129.42 | 22             | 8.01 (d) | 128.48 |
| 8              | —        | 138.30 | 23             | 7.47     | 128.67 |
| 9              | —        | 36.22  | 24             | 7.56     | 132.97 |
| 10             | 1.24     | 20.12  | 25             | 7.47     | 128.67 |
| 11             | 1.27,    | 23.70  | 26             | 8.01 (d) | 128.48 |
| 12             | —        | 137.1  | 27             | —        | 173.19 |
| 13             | 7.08 (d) | 130.28 | 28             | 4.18 (m) | 61.06  |
| 14             | 7.21 (m) | 128.02 | 29             | 1.23,    | 14.3   |
| 15             | 7.13 (m) | 125.97 |                |          |        |

## 11. Characterization of the product

### 3aa: 6-ethyl 3-methyl (1R,2R,3S,4R,5S,6R,7S)-7-benzoyl-1,9-dimethyl-3-phenyltricyclo[3.2.2.0<sup>2,4</sup>]-non-8-ene-3,6-dicarboxylate

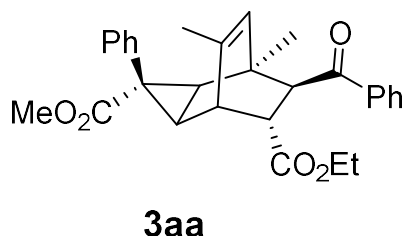

42.1 mg, 92% yield, 19:1 dr, 91% ee, light yellow solid, 132 – 134 °C;  $[\alpha]_D^{20} = -116.8$  ( $c = 0.86$ , in  $\text{CH}_2\text{Cl}_2$ ).

HPLC (Daicel chiralcel OX-3,  $\text{CO}_2/\text{MeOH}$  90/10, 1.5 mL/min,  $\lambda = 254$  nm),  $t_R(\text{major}) = 4.04$  min,  $t_R(\text{minor}) = 2.86$  min.

$^1\text{H NMR}$  (600 MHz,  $\text{Chloroform-}d$ )  $\delta = 8.01$  (d,  $J = 7.2$  Hz, 2H), 7.56 (t,  $J = 7.2$  Hz, 1H), 7.47 (t,  $J = 7.8$  Hz, 2H), 7.20 (m, 2H), 7.13 (m, 1H), 7.08 (d,  $J = 7.2$  Hz, 1H), 6.93 (d,  $J = 7.2$  Hz, 1H), 4.58 (s, 1H),

4.26 (d,  $J = 6.0$  Hz, 1H), 4.17 (m, 2H), 3.53 (s, 3H), 3.27 (s, 1H), 2.80 (d,  $J = 5.4$  Hz, 1H), 2.27 – 2.23 (m, 1H), 2.07 (d,  $J = 9.0$  Hz, 1H), 1.25 (m, 9H) ppm.

$^{13}\text{C NMR}$  (151 MHz,  $\text{CDCl}_3$ )  $\delta = 202.0, 174.3, 173.2, 139.3, 138.3, 137.1, 133.0, 131.2, 130.3, 129.4, 128.7, 128.5, 128.2, 127.5, 126.0, 61.1, 53.1, 52.7, 51.3, 41.6, 39.4, 37.8, 36.2, 27.8, 23.7, 20.1, 14.2$  ppm.

ESI-HRMS calcd for  $[\text{C}_{30}\text{H}_{32}\text{O}_5 + \text{Na}^+] = 458.2093$ , found 458.2092.

IR  $\tilde{\nu}$  ( $\text{cm}^{-1}$ ) 3059, 2959, 1722, 1677, 1446, 1374, 1300, 1230, 1024, 961, 734, 697, 521.

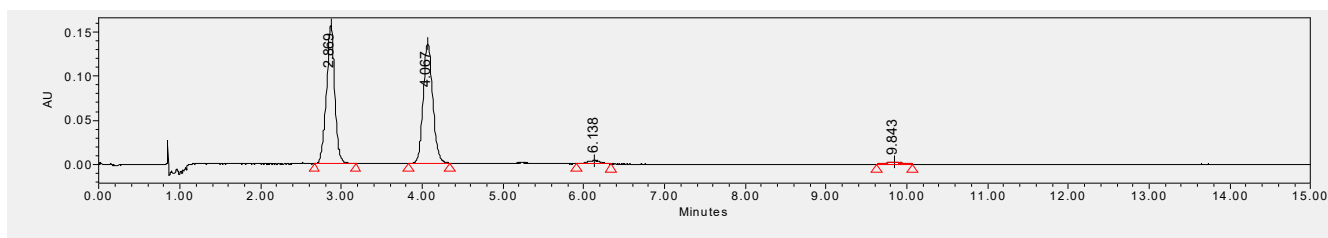

|   | Retention Time | Area    | % Area |
|---|----------------|---------|--------|
| 1 | 2.869          | 1130122 | 48.48  |
| 2 | 4.067          | 1132339 | 48.58  |
| 3 | 6.138          | 39799   | 1.71   |
| 4 | 9.843          | 28811   | 1.24   |

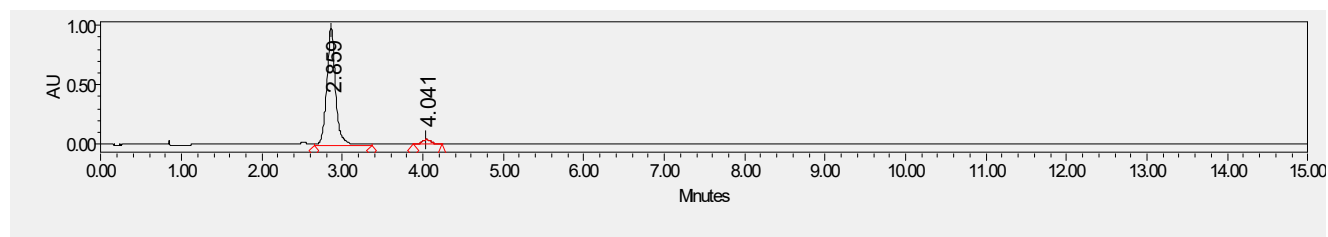

|   | Retention Time | Area    | % Area |
|---|----------------|---------|--------|
| 1 | 2.859          | 7491258 | 95.60  |
| 2 | 4.041          | 344750  | 4.40   |

**3ab: 6-ethyl-3-methyl-7-(2-fluorobenzoyl)-1,9-dimethyl-3-phenyltricyclo[3.2.2.0<sup>2,4</sup>]non-8-ene-3,6-dicarboxylate**

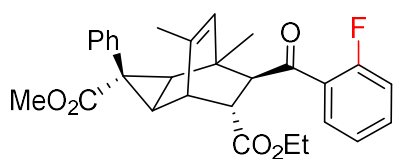

**3ab**

42.8 mg, 86% yield, 19:1 dr, 90% ee; light yellow liquid,  $[\alpha]_D^{22} = -137.7$  ( $c = 0.57$ , in  $\text{CH}_2\text{Cl}_2$ ).

HPLC (Daicel chiralcel OX-3,  $\text{CO}_2/\text{MeOH}$  90/10, 1.5 mL/min,  $\lambda = 254$  nm),  $t_R(\text{major}) = 2.99$  min,  $t_R(\text{minor}) = 4.33$  min

$^1\text{H NMR}$  (600 MHz,  $\text{Chloroform-}d$ )  $\delta = 7.78$  (m, 1H), 7.49 (m, 1H), 7.23 – 7.10 (m, 5H), 7.07 (d,  $J = 7.2$  Hz, 1H), 6.92 (d,  $J = 7.2$  Hz, 1H),

4.56 (s, 1H), 4.22 – 4.13 (m, 3H), 3.51 (s, 3H), 3.28 – 3.23 (m, 1H), 2.88 (dd,  $J = 5.4, 1.8$  Hz, 1H), 2.27 (dd,  $J = 9.0, 3.6$  Hz, 1H), 2.05 (d,  $J = 9.0$  Hz, 1H), 1.34 (s, 3H), 1.25 – 1.18 (m, 6H) ppm.

$^{13}\text{C NMR}$  (151 MHz,  $\text{CDCl}_3$ )  $\delta$  200.2, 200.2, 174.2, 173.1, 161.7, 160.0, 138.8, 137.1, 134.0 ( $J_{\text{C-F}} = 9.1$  Hz), 131.2, 130.6, 130.3, 129.1, 128.7 ( $J_{\text{C-F}} = 12.1$  Hz), 128.3, 127.5, 126.0, 124.4, 124.4, 117.1 ( $J_{\text{C-F}} = 22.6$  Hz), 116.9, 61.0, 57.4, 57.4, 52.7, 50.7, 42.0, 39.1, 37.9, 36.4, 27.7, 23.17, 20.1, 14.1 ppm.

$^{19}\text{F NMR}$  (565 MHz,  $\text{CDCl}_3$ )  $\delta = -111.10$  ppm.

ESI-HRMS calcd [ $\text{C}_{29}\text{H}_{29}\text{FO}_5 + \text{Na}^+$ ] = 477.2072, found 477.2070.

IR  $\tilde{\nu}$  ( $\text{cm}^{-1}$ ) 3058, 2874, 1718, 1606, 1577, 1481, 1448, 1373, 1228, 1193, 1127, 1024, 939, 768, 735, 643, 515

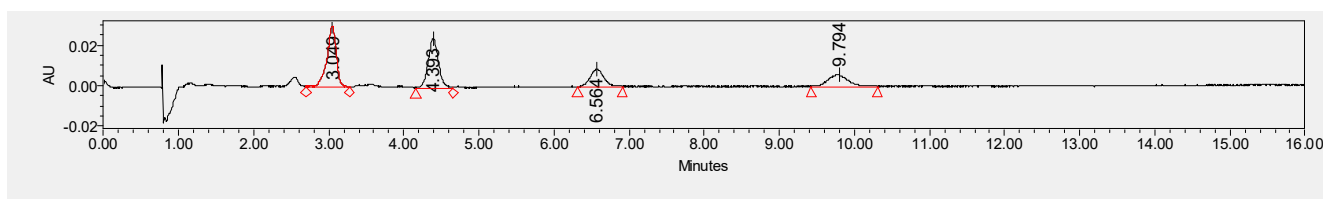

|   | Retention Time | Area   | % Area |
|---|----------------|--------|--------|
| 1 | 3.049          | 268424 | 37.30  |
| 2 | 4.393          | 232672 | 32.33  |
| 3 | 6.564          | 109849 | 15.27  |
| 4 | 9.794          | 108631 | 15.10  |

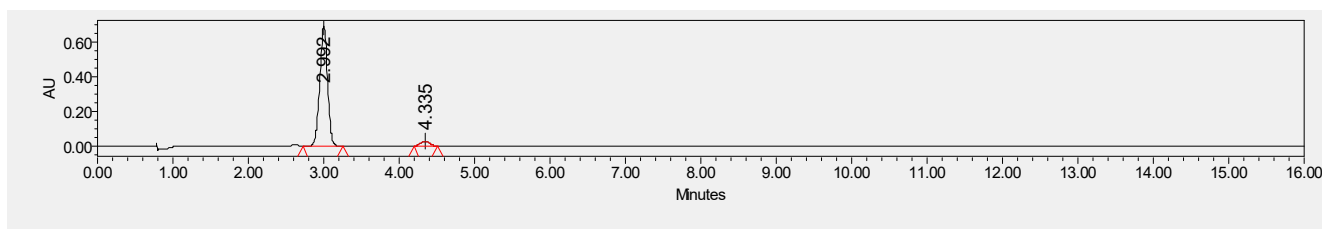

|   | Retention Time | Area    | % Area |
|---|----------------|---------|--------|
| 1 | 2.992          | 5080678 | 95.11  |
| 2 | 4.335          | 261247  | 4.89   |

**3ac: 6-ethyl 3-methyl-7-(3-fluorobenzoyl)-1,9-dimethyl-3-phenyltricyclo[3.2.2.0<sup>2,4</sup>]non-8-ene-3,6-dicarboxylate**

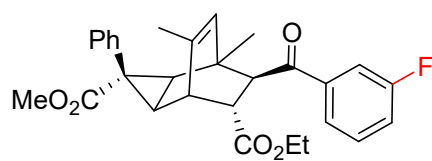

**3ac**

38.6 mg, 90% yield, 19:1 dr, 91% ee.; light yellow liquid,  $[\alpha]_D^{20} = -133.6$  ( $c = 0.53$ , in  $\text{CH}_2\text{Cl}_2$ ).

HPLC (Daicel chiralcel OXH,  $\text{CO}_2/\text{EtOH}$  95/5, 1.0 mL/min,  $\lambda = 254$  nm),  $t_R(\text{major}) = 14.03$  min,  $t_R(\text{minor}) = 15.82$  min.

$^1\text{H NMR}$  (400 MHz,  $\text{Chloroform-}d$ )  $\delta = 7.82$  (d,  $J = 7.6$  Hz, 1H), 7.66 (d,  $J = 9.6$  Hz, 1H), 7.46 (m, 1H), 7.30 – 7.06 (m, 5H), 6.92 (m, 1H), 4.57 (s, 1H), 4.27 – 4.12 (m, 3H), 3.53 (s, 3H), 3.32 – 3.23 (m, 1H), 2.78 (dd,  $J = 6.0, 2.0$  Hz, 1H), 2.23 (dd,  $J = 8.8, 3.6$  Hz, 1H), 2.06 (d,  $J = 9.2$  Hz, 1H), 1.33 – 1.18 (m, 9H) ppm.

$^{13}\text{C NMR}$  (101 MHz,  $\text{CDCl}_3$ )  $\delta = 200.9, 200.8, 174.2, 173.0, 164.1, 161.7, 141.4$  ( $J_{\text{C-F}} = 6.1\text{Hz}$ ), 141.3, 138.5, 137.0, 131.2, 130.3 ( $J_{\text{C-F}} = 7.5\text{Hz}$ ), 130.2, 129.2, 128.0, 127.5, 126.0, 124.3, 124.3, 120.0 ( $J_{\text{C-F}} = 21.1\text{Hz}$ ), 119.9, 115.1 ( $J_{\text{C-F}} = 22.2$  Hz), 61.2, 53.3, 52.7, 51.3, 41.7, 39.3, 37.70, 36.2, 27.8, 23.6, 20.1, 14.2 ppm.

$^{19}\text{F NMR}$  (377 MHz,  $\text{CDCl}_3$ )  $\delta = -111.72$  ppm.

ESI-HRMS calcd  $[\text{C}_{29}\text{H}_{29}\text{FO}_5 + \text{H}^+] = 477.2072$ , found 477.2071.

IR  $\tilde{\nu}$  ( $\text{cm}^{-1}$ ) 2906, 1718, 1680, 1586, 1439, 1374, 1305, 1230, 1192, 1059, 1026, 897, 788, 734, 701, 518.

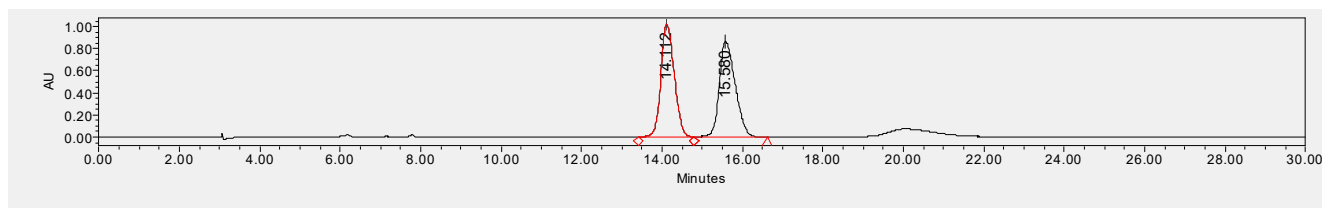

|   | Retention Time | Area     | % Area |
|---|----------------|----------|--------|
| 1 | 14.112         | 23490698 | 49.90  |
| 2 | 15.580         | 23582316 | 50.10  |

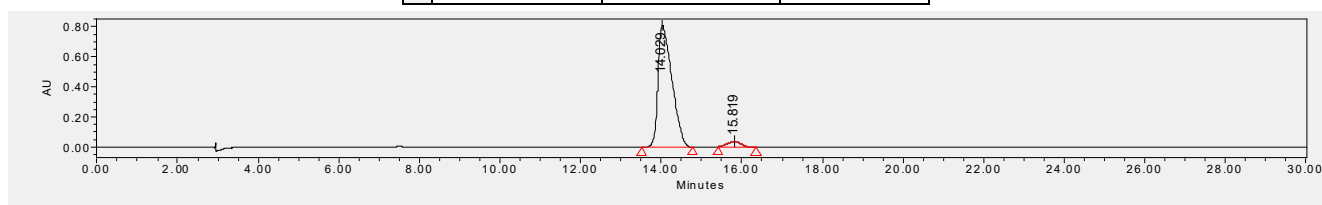

|   | Retention Time | Area     | % Area |
|---|----------------|----------|--------|
| 1 | 14.029         | 19531515 | 95.58  |
| 2 | 15.819         | 902403   | 4.42   |

**3ad: 6-ethyl 3-methyl-7-(4-fluorobenzoyl)-1,9-dimethyl-3-phenyltricyclo[3.2.2.0<sup>2,4</sup>]non-8-ene-3,6-dicarboxylate**

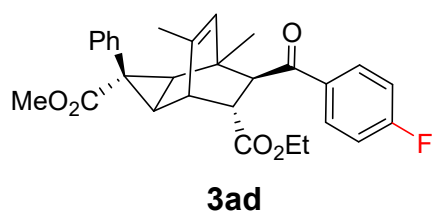

41.5 mg, 90% yield, 19:1dr, 91% ee.; light yellow liquid,  $[\alpha]_D^{22} = -116.0$  ( $c = 0.50$ , in  $\text{CH}_2\text{Cl}_2$ ).

HPLC (Daicel chiralcel IA, *n*-hexane/*i*-PrOH 90/10, 1.0 mL/min,  $\lambda = 254$  nm),  $t_R(\text{major}) = 7.27$  min,  $t_R(\text{minor}) = 9.36$  min.

$^1\text{H NMR}$  (600 MHz, Chloroform-*d*)  $\delta = 8.05$  (m, 2H), 7.24 – 7.11 (m, 5H), 7.08 (d,  $J = 7.2$  Hz, 1H), 6.92 (d,  $J = 7.8$  Hz, 1H), 4.58 (m, 1H), 4.23 – 4.15 (m, 3H), 3.53 (s, 3H), 3.28 – 3.25 (m, 1H), 2.76 (dd,  $J = 6.0, 1.8$  Hz, 1H), 2.22 (dd,  $J = 7.2, 4.2$  Hz, 1H), 2.06 (d,  $J = 9.0$  Hz, 1H), 1.28 – 1.22 (m, 9H) ppm.

$^{13}\text{C NMR}$  (151 MHz,  $\text{CDCl}_3$ )  $\delta$  200.40, 174.20, 173.13, 165.8, 138.28, 137.01, 135.64 ( $J_{\text{C-F}} = 2.3$  Hz), 131.2 ( $J_{\text{C-F}} = 8.8$  Hz), 130.26, 129.39, 128.03, 127.53, 126.00, 115.8 ( $J_{\text{C-F}} = 21.6$  Hz), 61.13, 53.1, 52.7, 51.38, 41.54, 39.43, 37.73, 36.19, 27.78, 23.65, 20.11, 14.25 ppm.

$^{19}\text{F NMR}$  (565 MHz,  $\text{CDCl}_3$ )  $\delta = -105.53$  ppm.

**ESI-HRMS** calcd for  $[\text{C}_{29}\text{H}_{29}\text{FO}_5 + \text{Na}^+] = 499.1891$ , found 499.1892.

**IR**  $\tilde{\nu}$  ( $\text{cm}^{-1}$ ) 2960, 2873, 1720, 1677, 1595, 1503, 1410, 1373, 1302, 1226, 1157, 1022, 961, 841, 800, 735, 603, 509.

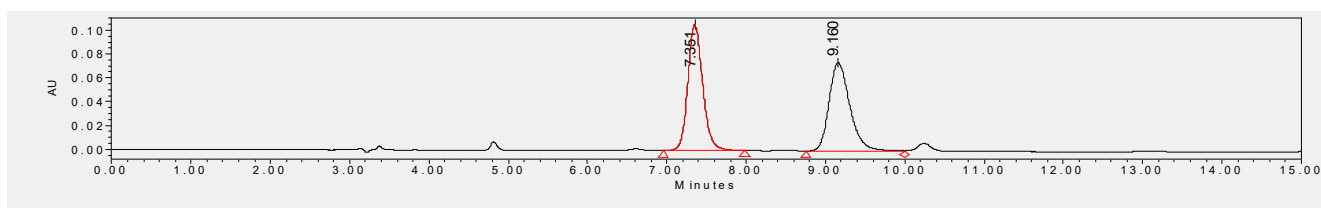

|   | Retention Time | Area    | % Area |
|---|----------------|---------|--------|
| 1 | 7.351          | 1383036 | 50.46  |
| 2 | 9.160          | 1357821 | 49.54  |

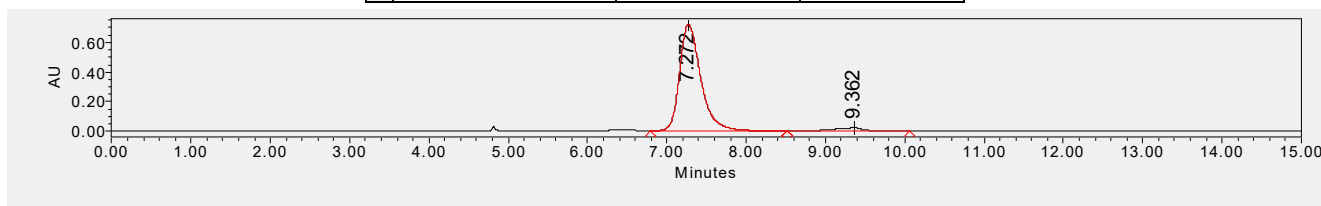

|   | Retention Time | Area     | % Area |
|---|----------------|----------|--------|
| 1 | 7.272          | 13481328 | 95.56  |
| 2 | 9.362          | 626282   | 4.44   |

**3ae: 6-ethyl 3-methyl -7-(4-chlorobenzoyl)-1,9-dimethyl-3-phenyltricyclo[3.2.2.0<sup>2,4</sup>]non-8-ene-3,6-dicarboxylate**

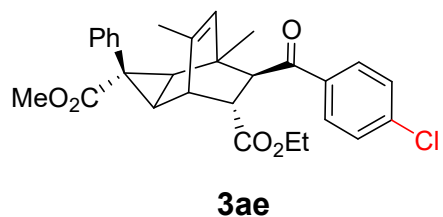

33.1 mg, 91% yield, 19:1dr, 92% ee.; light yellow solid, 130 – 132 °C,  $[\alpha]_{589}^{21} = -117.5$  ( $c = 0.53$ , in  $\text{CH}_2\text{Cl}_2$ ).

HPLC (Daicel chiralcel IB, *n*-hexane/*i*-PrOH 95/5, 1.0 mL/min,  $\lambda = 254$  nm),  $t_R(\text{major}) = 9.29$  min,  $t_R(\text{minor}) = 8.30$  min.

$^1\text{H NMR}$  (600 MHz, Chloroform-*d*)  $\delta = 7.96$  (d,  $J = 8.4$  Hz, 2H), 7.45 (d,  $J = 5.6$  Hz, 2H), 7.20 (m, 2H), 7.13 (t,  $J = 4.0$  Hz, 1H), 7.08 (d,  $J = 4.8$  Hz, 1H), 6.92 (d,  $J = 7.2$  Hz, 1H), 4.57 (s, 1H), 4.18 (m, 3H), 3.53 (s, 3H), 3.27 (s, 1H), 2.83 – 2.72 (m, 1H), 2.22 (dd,  $J = 9.0, 4.2$  Hz, 1H), 2.05 (d,  $J = 9.0$  Hz, 1H), 1.28 – 1.19 (m, 9H) ppm.

$^{13}\text{C NMR}$  (151 MHz,  $\text{CDCl}_3$ )  $\delta = 200.8, 174.2, 173.1, 139.5, 138.43, 137.6, 137.0, 131.21, 130.3, 129.90, 129.3, 129.0, 128.1, 127.5, 126.0, 61.2, 53.2, 52.7, 51.4, 41.6, 39.4, 37.7, 36.2, 27.8, 23.7, 20.1, 14.3$  ppm.

ESI-HRMS calcd  $[\text{C}_{29}\text{H}_{29}\text{ClO}_5 + \text{Na}^+] = 515.1595, 517.1566$ , found 515.1605, 517.1570.

IR  $\tilde{\nu}$  ( $\text{cm}^{-1}$ ) 2959, 2906, 1720, 1677, 1588, 1490, 1442, 1373, 1286, 1229, 1193, 1092, 1061, 961, 831, 735, 701, 527.

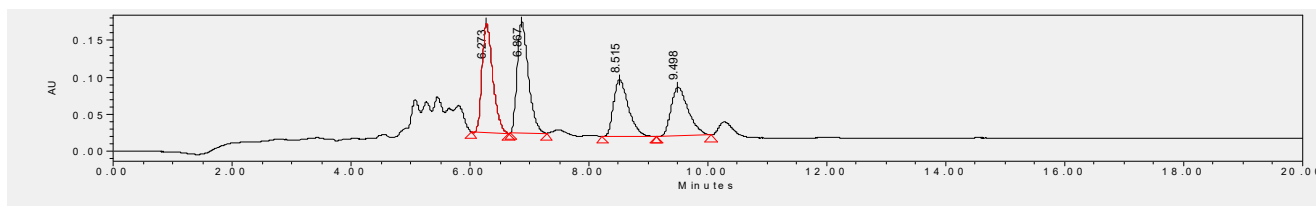

|   | Retention Time | Area    | % Area |
|---|----------------|---------|--------|
| 1 | 6.273          | 1862407 | 28.53  |
| 2 | 6.867          | 1978023 | 30.31  |
| 3 | 8.515          | 1352650 | 20.72  |
| 4 | 9.498          | 1333769 | 20.44  |

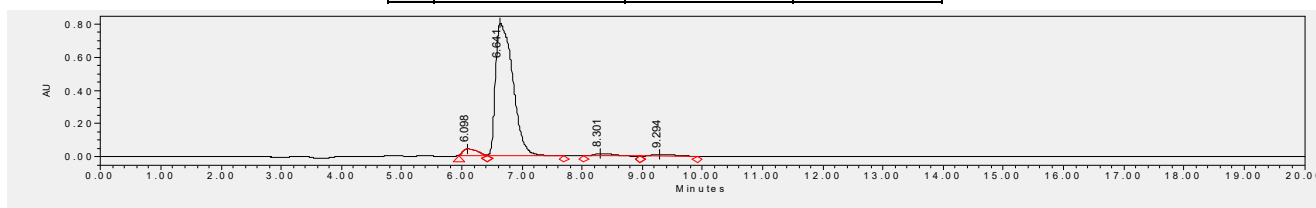

|   | Retention Time | Area     | % Area |
|---|----------------|----------|--------|
| 1 | 6.098          | 645042   | 3.77   |
| 2 | 6.641          | 15898521 | 92.80  |
| 3 | 8.301          | 312348   | 1.82   |
| 4 | 9.294          | 276253   | 1.61   |

**3af: 6-ethyl 3-methyl -7-(4-bromobenzoyl)-1,9-dimethyl-3-phenyltricyclo[3.2.2.0<sup>2,4</sup>]non-8-ene-3,6-dicarboxylate**

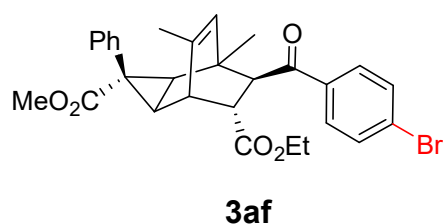

48.4 mg, 88% yield, 19:1dr, 91% ee.; light yellow solid, m.p. 137–138 °C,  $[\alpha]_D^{20} = -144.0$  ( $c = 0.60$ , in  $\text{CH}_2\text{Cl}_2$ ).

HPLC (Daicel chiralcel OX-3,  $\text{CO}_2/\text{MeOH}$  95/5, 1.5 mL/min,  $\lambda = 254$  nm),  $t_R(\text{major}) = 11.24$  min,  $t_R(\text{minor}) = 12.66$  min.

$^1\text{H NMR}$  (600 MHz,  $\text{Chloroform-}d$ )  $\delta = 7.88$  (d,  $J = 8.4$  Hz, 2H), 7.61 (d,  $J = 8.4$  Hz, 2H), 7.23 – 7.16 (m, 2H), 7.13 (t,  $J = 7.2$  Hz,

1H), 7.08 (d,  $J = 7.8$  Hz, 1H), 6.92 (d,  $J = 7.8$  Hz, 1H), 4.57 (s, 1H), 4.23 – 4.12 (m, 3H), 3.52 (s, 3H), 3.34 – 3.19 (m, 1H), 2.77 (dd,  $J = 6.0, 2.4$  Hz, 1H), 2.22 (dd,  $J = 8.0, 3.6$  Hz, 1H), 2.05 (d,  $J = 8.0$  Hz, 1H), 1.28 – 1.20 (m, 9H) ppm.

$^{13}\text{C NMR}$  (151 MHz,  $\text{CDCl}_3$ )  $\delta = 201.0, 174.2, 173.1, 138.4, 138.0, 137.0, 132.0, 131.2, 130.3, 130.0, 129.2, 128.3, 128.0, 127.53, 26.0, 61.2, 53.2, 52.7, 51.3, 41.6, 39.4, 37.7, 36.2, 27.8, 23.7, 20.1, 14.3$  ppm.

ESI-HRMS calcd  $[\text{C}_{29}\text{H}_{29}\text{BrO}_5 + \text{Na}^+] = 559.1091, 561.1070$ , found 559.1091, 561.1072.

IR  $\tilde{\nu}$  ( $\text{cm}^{-1}$ ) 2959, 1719, 1677, 1583, 1442, 1304, 1268, 1129, 1004, 961, 936, 735, 701, 535.

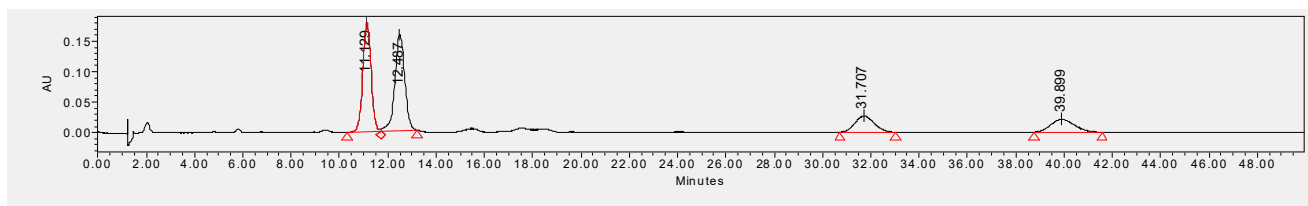

|   | Retention Time | Area    | % Area |
|---|----------------|---------|--------|
| 1 | 11.129         | 4302674 | 36.67  |
| 2 | 12.487         | 4458723 | 38.00  |
| 3 | 31.707         | 1493070 | 12.72  |
| 4 | 39.899         | 1479998 | 12.61  |

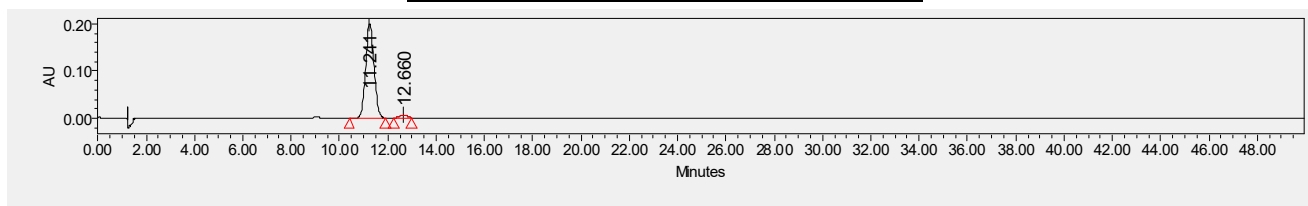

|   | Retention Time | Area    | % Area |
|---|----------------|---------|--------|
| 1 | 11.241         | 4874591 | 97.40  |
| 2 | 12.660         | 130056  | 2.60   |

**3ag: 6-ethyl 3-methyl -7-(4-iodobenzoyl)-1,9-dimethyl-3-phenyltricyclo[3.2.2.0<sup>2,4</sup>]non-8-ene-3,6-dicarboxylate**

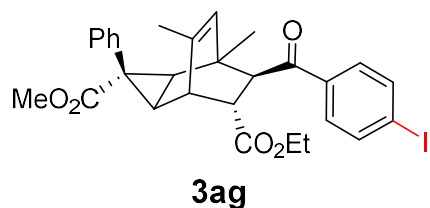

45.1 mg, 77% yield, 19:1 dr, 89% ee.; light yellow solid, m.p. 138 – 141 °C,  $[\alpha]_D^{20} = -147.3$  ( $c = 0.78$ , in  $\text{CH}_2\text{Cl}_2$ ).

HPLC (Daicel chiralcel OX-3,  $\text{CO}_2/\text{MeOH}$  95/5, 1.5 mL/min,  $\lambda = 254$  nm),  $t_R(\text{major}) = 4.79$  min,  $t_R(\text{minor}) = 5.22$  min.

$^1\text{H NMR}$  (400 MHz,  $\text{Chloroform-}d$ )  $\delta = 7.83$  (d,  $J = 8.4$  Hz, 2H), 7.72 (d,  $J = 8.6$  Hz, 2H), 7.24 – 7.04 (m, 4H), 6.91 (d,  $J = 8.4$  Hz, 1H), 4.56 (s, 1H), 4.23 – 4.12 (m, 3H), 3.52 (s, 3H), 3.26 (m, 1H), 2.76 (dd,  $J = 6.0, 2.2$  Hz, 1H), 2.22 (dd,  $J = 9.2, 4.0$  Hz, 1H), 2.05 (d,  $J = 9.2$  Hz, 1H), 1.28 – 1.20 (m, 9H) ppm.

$^{13}\text{C NMR}$  (101 MHz,  $\text{CDCl}_3$ )  $\delta = 201.30$  174.2, 173.1, 138.5, 138.4, 138.0, 136.9, 131.2, 130.23 129.9, 129.2, 128.02 127.52, 126.0, 101.12, 61.2, 53.1, 52.8, 51.3, 41.60 39.3, 37.72, 36.2, 27. 8, 23.7, 20.1, 14.3 ppm.

ESI-HRMS calcd  $[\text{C}_{29}\text{H}_{29}\text{IO}_5 + \text{Na}^+] = 607.0952$ , found 607.0952.

IR  $\tilde{\nu}$  ( $\text{cm}^{-1}$ ) 2958, 1719, 1676, 1442, 1393, 1229, 1190, 1059, 1026, 961, 861, 735, 726, 626, 525.

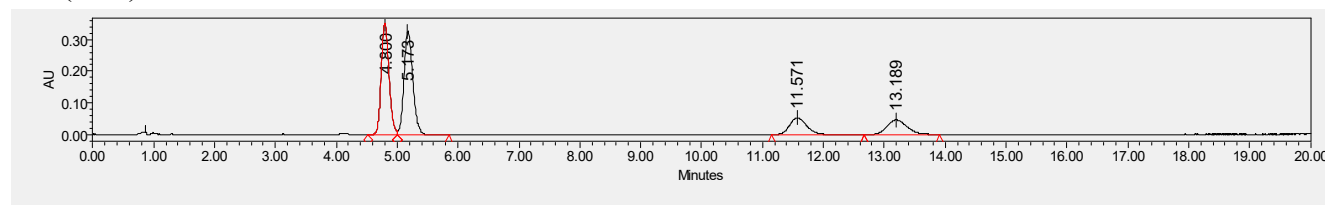

|   | Retention Time | Area    | % Area |
|---|----------------|---------|--------|
| 1 | 4.800          | 3173838 | 36.90  |
| 2 | 5.173          | 3305437 | 38.43  |
| 3 | 11.571         | 1066499 | 12.40  |
| 4 | 13.189         | 1055453 | 12.27  |

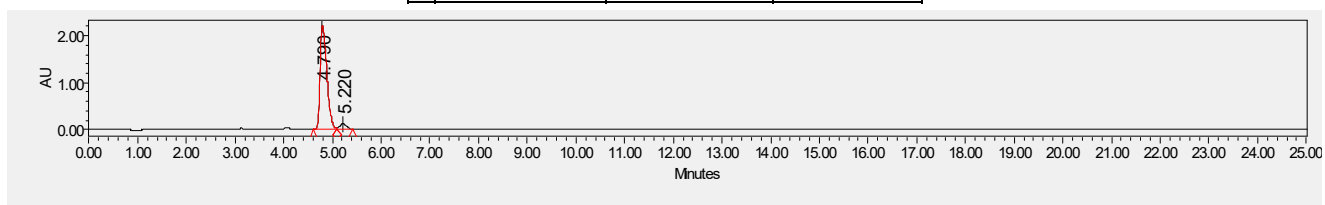

|   | Retention Time | Area     | % Area |
|---|----------------|----------|--------|
| 1 | 4.790          | 21566283 | 94.69  |
| 2 | 5.220          | 1209934  | 5.31   |



**3ah: 6-ethyl-3-methyl-1,9-dimethyl-3-phenyl-7-(2-(trifluoromethyl)benzoyl)tricyclo[3.2.2.0<sup>2,4</sup>]non-8-ene-3,6-dicarboxylate**

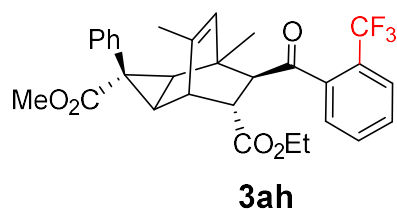

33.1 mg, 67% yield, 19:1 dr, 87% ee.; light yellow liquid,  $[\alpha]_D^{22} = -110.7$  ( $c = 0.65$ , in  $\text{CH}_2\text{Cl}_2$ ).

HPLC (Daicel chiralcel ODH,  $\text{CO}_2/\text{MeOH}$  95/5, 1.0 mL/min,  $\lambda = 254$  nm),  $t_R(\text{major}) = 10.75$  min,  $t_R(\text{minor}) = 9.54$  min.

$^1\text{H NMR}$  (400 MHz,  $\text{Chloroform-}d$ )  $\delta = 8.30 - 8.17$  (m, 2H), 7.82 (d,  $J = 8.0$  Hz, 1H), 7.63 (t,  $J = 8.0$  Hz, 1H), 7.24 - 7.06 (m, 4H), 6.92 (m

1H), 4.59 (s, 1H), 4.27 - 4.14 (m, 3H), 3.53 (s, 3H), 3.31 - 3.27 (m, 1H), 2.78 (dd,  $J = 6.0, 2.0$  Hz, 1H), 2.25 (dd,  $J = 5.6, 2.0$  Hz, 1H), 2.08 (d,  $J = 9.2$  Hz, 1H), 1.30 - 1.21 (m, 9H) ppm.

$^{13}\text{C NMR}$  (101 MHz,  $\text{CDCl}_3$ )  $\delta = 200.8, 174.2, 172.9, 139.7, 138.6, 136.9, 131.64, 131.2, 130.2, 129.4, 129.20, 128.1, 127.6, 126.1, 125.20$  ( $J_{\text{C-F}} = 5.1$  Hz), 61.3, 53.5, 52.8, 51.4, 41.7, 39.3, 37.6, 36.2, 27.7, 23.7, 20.1, 14.2 ppm.

$^{19}\text{F NMR}$  (377 MHz,  $\text{CDCl}_3$ )  $\delta = -62.72$  ppm.

ESI-HRMS calcd [ $\text{C}_{30}\text{H}_{29}\text{F}_3\text{O}_5 + \text{Na}^+$ ] = 549.1859, found 549.1859

IR  $\tilde{\nu}$  ( $\text{cm}^{-1}$ ) 3026, 2874, 1720, 1683, 1607, 1439, 1375, 1329, 1231, 1197, 1168, 1127, 1072, 998, 808, 780, 735, 697, 513.

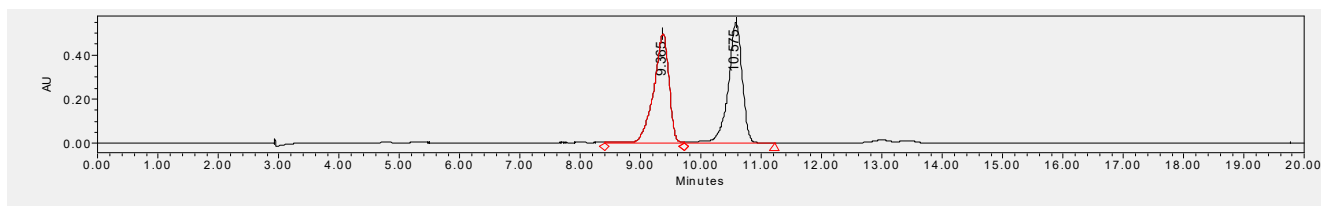

|   | Retention Time | Area    | % Area |
|---|----------------|---------|--------|
| 1 | 9.365          | 8586720 | 49.54  |
| 2 | 10.575         | 8746136 | 50.46  |

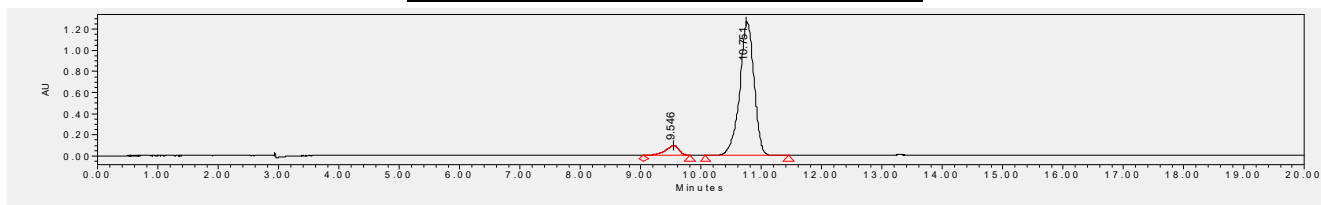

|   | Retention Time | Area     | % Area |
|---|----------------|----------|--------|
| 1 | 9.546          | 1452289  | 6.51   |
| 2 | 10.751         | 20866121 | 93.49  |

**3ai: 6-ethyl-3-methyl-1,9-dimethyl-3-phenyl-7-(4-(trifluoromethyl)benzoyl)tricyclo[3.2.2.0<sup>2,4</sup>]non-8-ene-3,6-dicarboxylate**

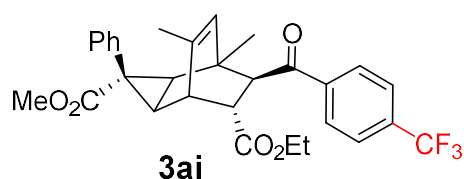

32.4 mg, 61% yield, 19:1dr, 87% ee.; light yellow liquid,  $[\alpha]_D^{22} = -129.7$  ( $c = 0.48$ , in  $\text{CH}_2\text{Cl}_2$ ).

HPLC (Daicel chiralcel ODH,  $\text{CO}_2/\text{MeOH}$  95/5, 1.0 mL/min,  $\lambda = 254$  nm),  $t_R(\text{major}) = 10.31$  min,  $t_R(\text{minor}) = 9.15$  min.

$^1\text{H NMR}$  (600 MHz, Chloroform-*d*)  $\delta = 8.11$  (d,  $J = 7.8$  Hz, 2H), 7.74 (d,  $J = 4.2$  Hz, 2H), 7.20 (m, 2H), 7.13 (d,  $J = 7.2$  Hz, 1H), 7.08 (d,  $J = 4.8$  Hz, 1H), 6.92 (d,  $J = 7.6$  Hz, 1H), 4.58 (s, 1H), 4.26 (d,  $J = 6.0$  Hz, 1H), 4.19 (q,  $J = 5.6$  Hz, 2H), 3.53 (s, 3H), 3.33 – 3.26 (m, 1H), 2.79 (dd,  $J = 6.0, 1.8$  Hz, 1H), 2.23 (dd,  $J = 9.2, 4.2$  Hz, 1H), 2.07 (d,  $J = 9.2$  Hz, 1H), 1.28 – 1.23 (m, 9H) ppm.

$^{13}\text{C NMR}$  (151 MHz,  $\text{CDCl}_3$ )  $\delta = 201.3, 174.2, 173.00, 142.0, 138.8, 136.9, 134.1$  ( $J_{\text{C-F}} = 31.7$  Hz), 131.2, 130.3, 129.1, 128.7, 128.1, 127.6, 126.1, 125.8, ( $J_{\text{C-F}} = 3.0$  Hz), 61.2, 53.6, 52.8, 51.4, 41.8, 39.3, 37.7, 36.2, 27.7, 23.7, 20.1, 14.2 ppm.

$^{19}\text{F NMR}$  (565 MHz,  $\text{CDCl}_3$ )  $\delta = -63.03$  ppm.

ESI-HRMS calcd [ $\text{C}_{30}\text{H}_{29}\text{F}_3\text{O}_5 + \text{Na}^+$ ] = 549.1859, found 549.1862.

IR  $\tilde{\nu}$  ( $\text{cm}^{-1}$ ) 3058, 2874, 1721, 1683, 1602, 1580, 1507, 1444, 1376, 1322, 1268, 1230, 1169, 1129, 1066, 886, 774, 702.

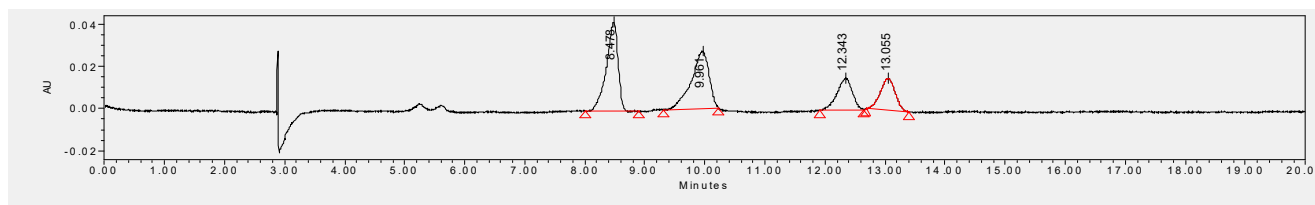

|   | Retention Time | Area   | % Area |
|---|----------------|--------|--------|
| 1 | 8.478          | 569766 | 34.33  |
| 2 | 9.961          | 560041 | 33.74  |
| 3 | 12.343         | 265838 | 16.02  |
| 4 | 13.055         | 264233 | 15.92  |

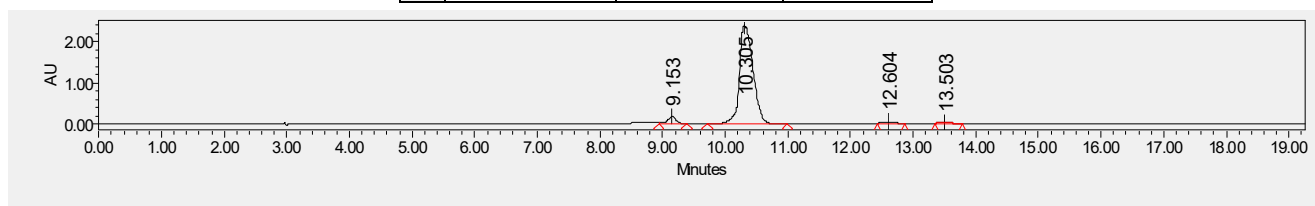

|   | Retention Time | Area     | % Area |
|---|----------------|----------|--------|
| 1 | 9.153          | 1709917  | 4.43   |
| 2 | 10.305         | 36081383 | 93.43  |
| 3 | 12.604         | 493935   | 1.28   |
| 4 | 13.503         | 333353   | 0.86   |

**3aj: 6-ethyl-3-methyl-1,9-dimethyl-3-phenyl-7-(4-nitrobenzoyl)tricyclo[3.2.2.0<sup>2,4</sup>]non-8-ene-3,6-dicarboxylate**

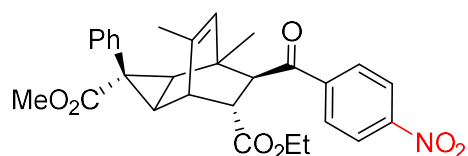

**3aj**

7.5 mg, 43% yield, 19:1 dr, 81% ee, yellow liquid,  $[\alpha]_D^{21} = -135.4$  ( $c = 0.21$ , in  $\text{CH}_2\text{Cl}_2$ ).

HPLC (Daicel chiralcel OX-3,  $\text{CO}_2/\text{MeOH}$  90/10, 1.5 mL/min,  $\lambda = 254$  nm),  $t_R(\text{major}) = 4.46$  min,  $t_R(\text{minor}) = 5.13$  min.

$^1\text{H NMR}$  (400 MHz, Chloroform-*d*)  $\delta = 8.32$  (d,  $J = 8.8$  Hz, 2H), 8.16 (d,  $J = 8.8$  Hz, 2H), 7.25 – 7.11 (m, 3H), 7.08 (d,  $J = 7.6$  Hz, 1H), 6.91 (d,  $J = 7.6$  Hz, 1H), 4.57 (s, 1H), 4.28 – 4.14 (m, 3H), 3.53 (s, 3H), 3.31 (m, 1H), 2.79 (dd,  $J = 6.0, 2.0$  Hz, 1H), 2.22 (dd,  $J = 9.2, 4.0$  Hz, 1H), 2.06 (d,  $J = 9.0$  Hz, 1H), 1.30 – 1.22 (m, 9H) ppm.

$^{13}\text{C NMR}$  (101 MHz,  $\text{CDCl}_3$ )  $\delta = 201.0, 174.1, 172.9, 150.2, 143.9, 139.0, 136.8, 131.2, 130.3, 129.4, 128.9, 128.1, 127.6, 126.1, 124.0, 61.4, 54.1, 52.8, 51.5, 41.9, 39.3, 37.6, 36.2, 27.7, 23.8, 20.2, 14.3$  ppm.

ESI-HRMS calcd  $[\text{C}_{29}\text{H}_{29}\text{NO}_7 + \text{Na}^+] = 526.1836$ , found 526.1840.

IR  $\tilde{\nu}$  ( $\text{cm}^{-1}$ ) 2959, 1721, 1685, 1602, 1572, 1444, 1316, 1268, 1060, 962, 888, 844, 724, 702, 507.

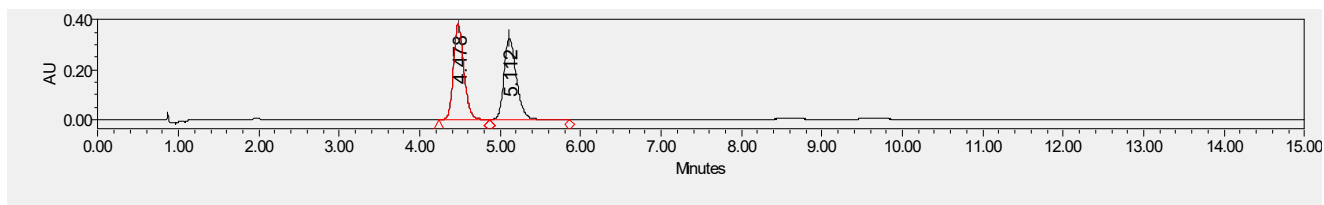

|   | Retention Time | Area    | % Area |
|---|----------------|---------|--------|
| 1 | 4.478          | 3457003 | 49.72  |
| 2 | 5.112          | 3495520 | 50.28  |

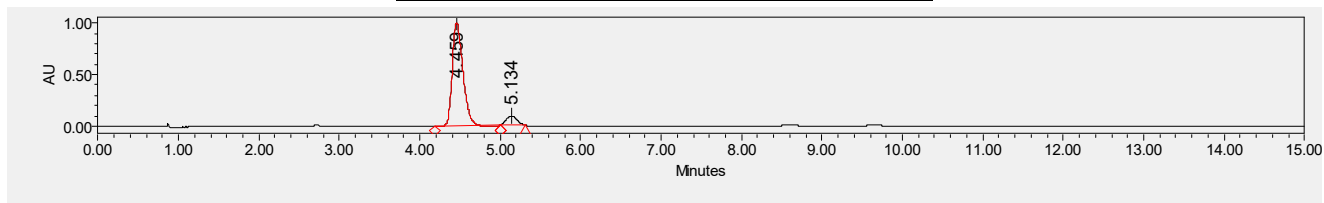

|   | Retention Time | Area    | % Area |
|---|----------------|---------|--------|
| 1 | 4.459          | 9206389 | 91.40  |
| 2 | 5.134          | 866333  | 8.60   |

**3ak: 6-ethyl 3-methyl -1,9-dimethyl-7-(2-methylbenzoyl)-3-phenyltricyclo[3.2.2.0<sup>2,4</sup>]non-8-ene-3,6-dicarboxylate**

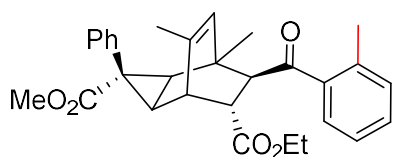

**3ak**

23.6 mg, 50% yield, 19:1dr, 90% ee.; light yellow liquid;  $[\alpha]_D^{20} = -53.2$  ( $c = 0.38$ , in  $\text{CH}_2\text{Cl}_2$ ).

HPLC (Daicel chiralcel OX-3,  $\text{CO}_2/\text{MeOH}$  95/5, 1.5 mL/min,  $\lambda = 254$  nm),  $t_R(\text{major}) = 5.03$  min,  $t_R(\text{minor}) = 8.42$  min

$^1\text{H NMR}$  (400 MHz,  $\text{Chloroform-}d$ )  $\delta = 7.90$  (d,  $J = 7.6$  Hz, 1H), 7.37 (t,  $J = 7.6$  Hz, 1H), 7.30 (t,  $J = 7.6$  Hz, 1H), 7.24 – 7.06 (m, 5H), 6.91 (d,  $J = 7.6$  Hz, 1H), 4.57 (s, 1H), 4.21 (q,  $J = 8.0$  Hz, 2H), 4.13 (d,  $J = 5.8$  Hz, 1H), 3.51 (s, 3H), 3.31 – 3.24 (m, 1H), 2.90 (dd,  $J = 5.6, 2.0$  Hz, 1H), 2.37 (s, 3H), 2.23 (dd,  $J = 3.6, 4.0$  Hz, 1H), 2.00 (d,  $J = 9.2$  Hz, 1H), 1.31 – 1.23 (m, 9H) ppm.

$^{13}\text{C NMR}$  (101 MHz,  $\text{CDCl}_3$ )  $\delta = 204.7, 174.2, 173.4, 140.3, 138.6, 137.5, 137.1, 131.9, 131.2, 131.2, 130.3, 129.2, 129.1, 128.1, 127.5, 126.0, 125.7, 61.1, 56.4, 52.7, 50.3, 41.9, 39.2, 38.1, 36.3, 28.0, 23.6, 21.0, 20.3, 14.3$  ppm.

ESI-HRMS calcd  $[\text{C}_{30}\text{H}_{32}\text{O}_5 + \text{Na}^+] = 495.2142$ , found 495.2142.

IR  $\tilde{\nu}$  ( $\text{cm}^{-1}$ ) 2960, 2872, 1722, 1680, 1600, 1447, 1374, 1231, 1194, 1027, 775, 735, 702, 532.

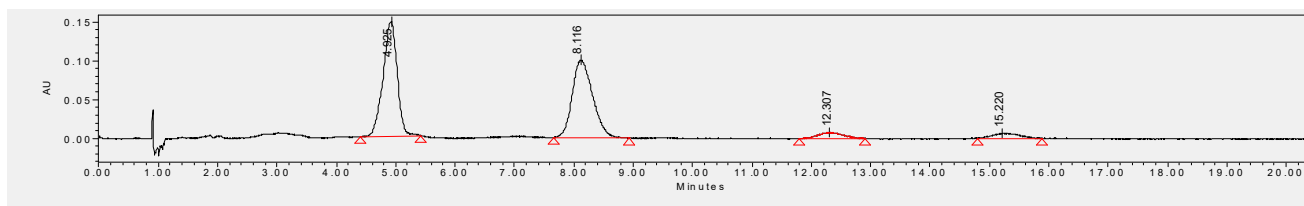

|   | Retention Time | Area    | % Area |
|---|----------------|---------|--------|
| 1 | 4.925          | 2445410 | 46.29  |
| 2 | 8.116          | 2414241 | 45.70  |
| 3 | 12.307         | 222238  | 4.21   |
| 4 | 15.220         | 200905  | 3.80   |

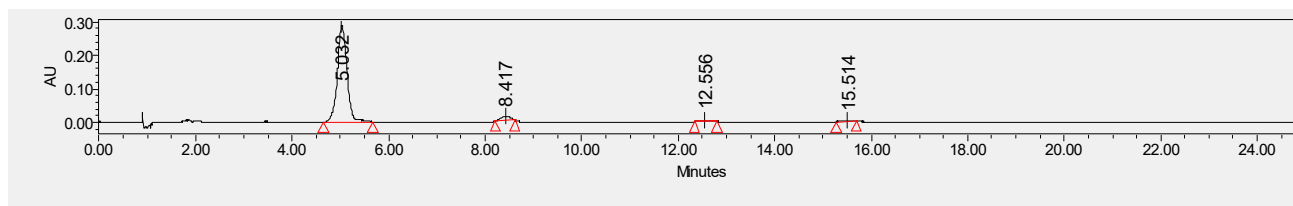

|   | Retention Time | Area    | % Area |
|---|----------------|---------|--------|
| 1 | 5.032          | 4008880 | 93.59  |
| 2 | 8.417          | 185118  | 4.32   |
| 3 | 12.556         | 51734   | 1.21   |
| 4 | 15.514         | 37533   | 0.88   |

**3al: 6-ethyl 3-methyl -1,9-dimethyl-7-(3-methylbenzoyl)-3-phenyltricyclo[3.2.2.0<sup>2,4</sup>]non-8-ene-3,6-dicarboxylate**

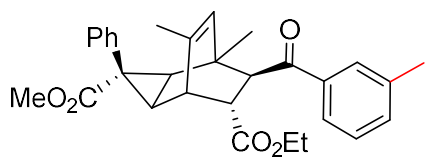

**3al**

354.2 mg, 75% yield, 19:1 dr, 91% ee.; light yellow liquid;  $[\alpha]_D^{20} = -132.6$  ( $c = 0.56$ , in  $\text{CH}_2\text{Cl}_2$ ).

HPLC (Daicel chiralcel OX-3,  $\text{CO}_2/\text{MeOH}$  90/10, 1.5 mL/min,  $\lambda = 254$  nm),  $t_R(\text{major}) = 2.86$  min,  $t_R(\text{minor}) = 3.45$  min

$^1\text{H NMR}$  (400 MHz, Chloroform- $d$ )  $\delta = 7.81$  (d,  $J = 10.4$  Hz, 2H), 7.36 (m, 2H), 7.24 – 7.05 (m, 4H), 6.92 (m, 1H), 4.57 (s, 1H), 4.24

(d,  $J = 6.0$  Hz, 1H), 4.17 (m, 2H), 3.52 (s, 3H), 3.29 – 3.23 (m, 1H), 2.80 (dd,  $J = 6.0, 2.4$  Hz, 1H), 2.42 (s, 3H), 2.25 (dd,  $J = 9.2, 4.0$  Hz, 1H), 2.08 (d,  $J = 9.2$  Hz, 1H), 1.28 – 1.21 (m, 9H) ppm.

$^{13}\text{C NMR}$  (101 MHz,  $\text{CDCl}_3$ )  $\delta = 202.1, 174.3, 173.2, 139.3, 138.4, 138.3, 137.1, 133.8, 131.2, 130.3, 129.4, 128.9, 128.5, 128.0, 127.5, 125.94, 125.7, 61.0, 53.1, 52.7, 51.2, 41.5, 39.4, 37.9, 36.2, 27.9, 23.7, 21.5, 20.1, 14.2$  ppm.

ESI-HRMS calcd  $[\text{C}_{30}\text{H}_{32}\text{O}_5 + \text{Na}^+] = 495.2142$ , found 495.2142.

IR  $\tilde{\nu}$  ( $\text{cm}^{-1}$ ) 2958, 2906, 1719, 1674, 1601, 1494, 1444, 1373, 1230, 1188, 1026, 892, 786, 733, 700, 515.

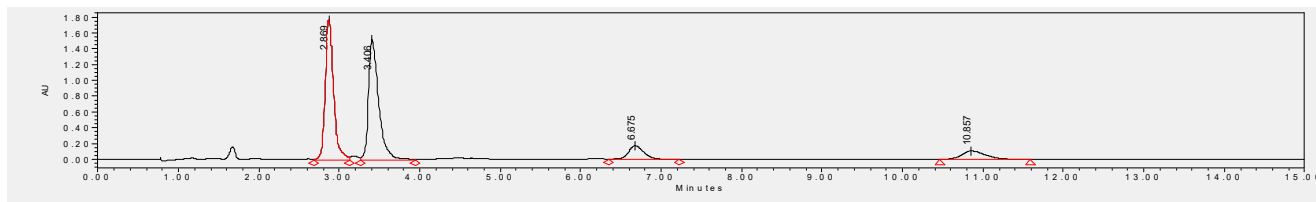

|   | Retention Time | Area     | % Area |
|---|----------------|----------|--------|
| 1 | 2.869          | 13055161 | 41.71  |
| 2 | 3.406          | 13666272 | 43.66  |
| 3 | 6.675          | 2399852  | 7.67   |
| 4 | 10.857         | 2180315  | 6.97   |

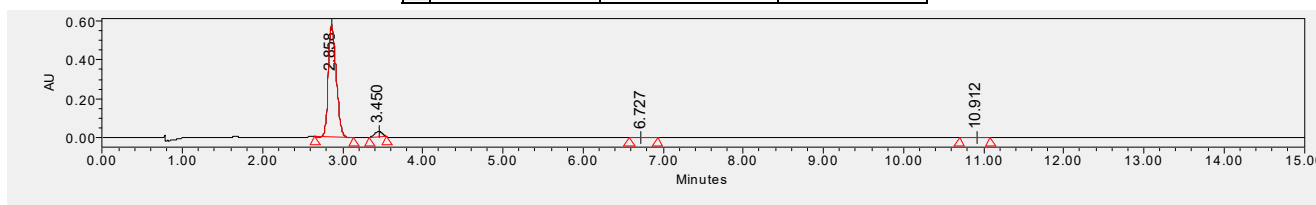

|   | Retention Time | Area    | % Area |
|---|----------------|---------|--------|
| 1 | 2.858          | 3945017 | 94.63  |
| 2 | 3.450          | 185509  | 4.45   |
| 3 | 6.727          | 22102   | 0.53   |
| 4 | 10.912         | 16391   | 0.39   |

**3am: 6-ethyl 3-methyl-1,9-dimethyl-7-(4-methylbenzoyl)-3-phenyltricyclo[3.2.2.0<sup>2,4</sup>]non-8-ene-3,6-dicarboxylate**

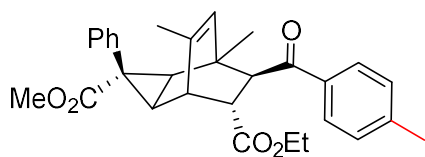

**3am**

330.3 mg, 70% yield, 19:1dr, 91% ee.; light yellow liquid;  $[\alpha]_D^{20} = -126.7$  ( $c = 0.57$ , in  $\text{CH}_2\text{Cl}_2$ ).

HPLC (Daicel chiralcel IE, *n*-hexane/*i*-PrOH, 90/10, 1.0mL/min,  $\lambda = 254$  nm),  $t_R(\text{major}) = 11.38$  min,  $t_R(\text{minor}) = 13.57$  min.

$^1\text{H NMR}$  (400 MHz, Chloroform-*d*)  $\delta = 7.81$  (d,  $J = 10.0$  Hz, 2H), 7.36 (m, 2H), 7.15 (m, 4H), 6.92 (d,  $J = 7.6$  Hz, 1H), 4.57 (s, 1H),

4.31 – 4.07 (m, 3H), 3.53 (s, 3H), 3.26 (s, 1H), 2.80 (d,  $J = 5.6$  Hz, 1H), 2.42 (s, 3H), 2.25 (dd,  $J = 9.2$ , 3.6 Hz, 1H), 2.08 (d,  $J = 5.2$ , Hz, 1H), 1.31 – 1.18 (m, 9H) ppm.

$^{13}\text{C NMR}$  (101 MHz,  $\text{CDCl}_3$ )  $\delta$  202.1, 174.3, 173.2, 139.3, 138.4, 138.3, 137.1, 133.7, 131.2, 130.3, 129.4, 129.0, 128.5, 128.0, 127.5, 126.0, 125.8, 61.0, 53.2, 52.7, 51.2, 41.5, 39.4, 37.9, 36.2, 27.9, 23.7, 21.4, 20.1, 14.2 ppm.

ESI-HRMS calcd  $[\text{C}_{30}\text{H}_{32}\text{O}_5 + \text{Na}^+] = 495.2142$ , found 495.2143.

IR  $\tilde{\nu}$  ( $\text{cm}^{-1}$ ) 3026, 2872, 1720, 1675, 1584, 1442, 1303, 1231, 1190, 1056, 1026, 997, 734, 700, 661, 515.

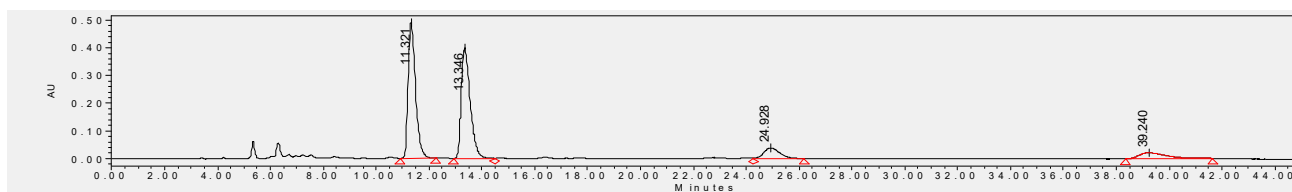

|   | Retention Time | Area    | % Area |
|---|----------------|---------|--------|
| 1 | 11.321         | 9490817 | 42.82  |
| 2 | 13.346         | 9450531 | 42.64  |
| 3 | 24.928         | 1641032 | 7.40   |
| 4 | 39.240         | 1579995 | 7.13   |

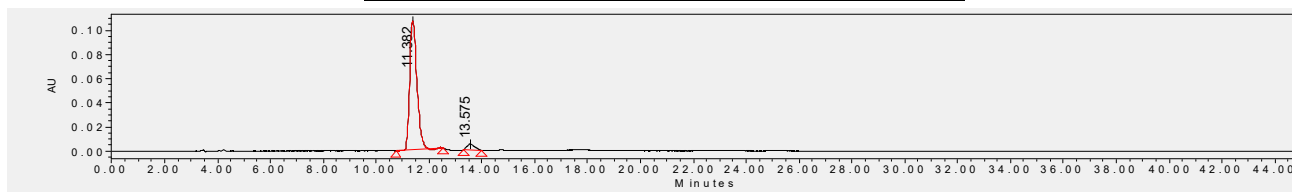

|   | Retention Time | Area    | % Area |
|---|----------------|---------|--------|
| 1 | 11.382         | 2036957 | 95.55  |
| 2 | 13.575         | 94854   | 4.45   |

**3an: 6-ethyl3-methyl-7-(4-cyclohexylbenzoyl)-1,9-dimethyl-3-phenyltricyclo[3.2.2.0<sup>2,4</sup>]non-8-ene -3,6-dicarboxylate**

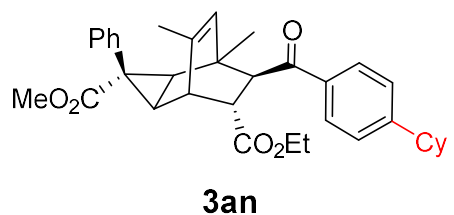

36.8 mg, 68% yield, 19:1 dr, 93% ee.; light yellow solid, 143 – 144 °C,  $[\alpha]_D^{20} = -141.2$  ( $c = 0.61$ , in  $\text{CH}_2\text{Cl}_2$ ).

HPLC (Daicel chiralcel IA,  $\text{CO}_2/\text{MeOH}$  90/10, 1.5 mL/min,  $\lambda = 254$  nm),  $t_R(\text{major}) = 5.81$  min,  $t_R(\text{minor}) = 9.11$  min.

$^1\text{H}$  NMR (400 MHz, Chloroform-*d*)  $\delta = 7.94$  (d,  $J = 8.4$  Hz, 2H), 7.29 (d,  $J = 8.0$  Hz, 2H), 7.24 – 7.06 (m, 4H), 6.93 (m, 1H), 4.59 (s, 1H), 4.24 (d,  $J = 6.0$  Hz, 1H), 4.16 (m, 2.0 Hz, 2H), 3.53 (s, 3H), 3.25 (m, 1H), 2.77 (dd,  $J = 6.0, 2.4$  Hz, 1H), 2.56 (m, 1H), 2.24 (dd,  $J = 6.0, 2.4$  Hz, 1H), 2.10 – 2.05 (m, 1H), 1.87 (s, 4H), 1.76 (d,  $J = 12.4$  Hz, 1H), 1.42 (m, 4H), 1.31 – 1.20 (m, 10H) ppm.

$^{13}\text{C}$  NMR (101 MHz,  $\text{CDCl}_3$ )  $\delta = 201.5, 174.3, 173.2, 153.7, 138.0, 137.13, 136.9, 131.2, 130.2, 129.6, 128.7, 128.0, 127.5, 127.1, 125.9, 61.0, 52.8, 52.7, 51.3, 44.6, 41.5, 39.4, 37.9, 36.1, 34.1, 34.1, 27.9, 26.7, 26.0, 23.7, 20.1, 14.2$  ppm.

ESI-HRMS calcd  $[\text{C}_{35}\text{H}_{40}\text{O}_5 + \text{Na}^+] = 563.2768$ , found 563.2767.

IR  $\tilde{\nu}$  (cm<sup>-1</sup>) 2926, 2852, 1722, 1673, 1567, 1446, 1267, 1228, 1188, 1028, 994, 937, 828, 735, 701, 529.

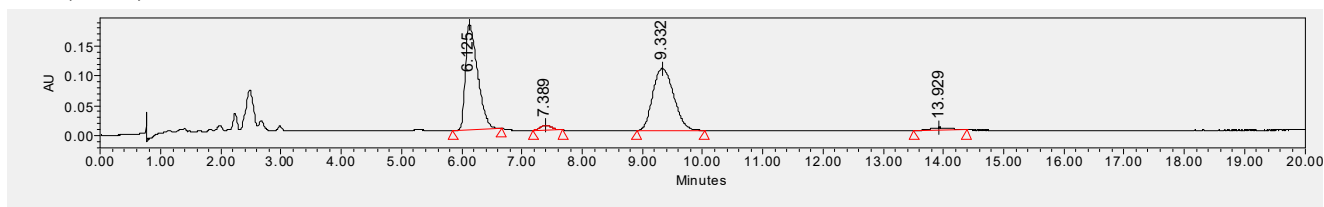

|   | Retention Time | Area    | % Area |
|---|----------------|---------|--------|
| 1 | 6.125          | 2507779 | 48.03  |
| 2 | 7.389          | 104398  | 2.00   |
| 3 | 9.332          | 2505765 | 47.99  |
| 4 | 13.929         | 103105  | 1.97   |

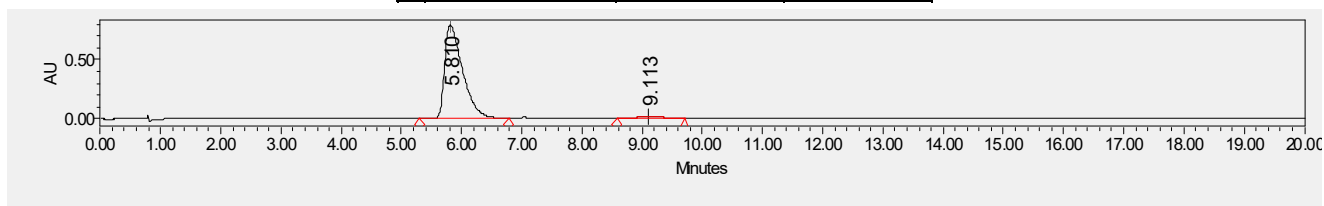

|   | Retention Time | Area     | % Area |
|---|----------------|----------|--------|
| 1 | 5.810          | 16522069 | 96.70  |
| 2 | 9.113          | 564686   | 3.30   |

**3ao: 6-ethyl3-methyl-7-(4-ethynylbenzoyl)-1,9-dimethyl-3-phenyltricyclo[3.2.2.0<sup>2,4</sup>]non-8-ene-3,6-dicarboxylate**

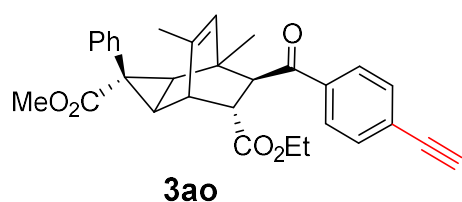

29.5 mg, 61% yield, 19:1 dr, 87% ee.; light yellow liquid,  $[\alpha]_D^{20} = -160.9$  ( $c = 0.77$ , in  $\text{CH}_2\text{Cl}_2$ ).

HPLC (Daicel chiralcel ODH,  $\text{CO}_2/\text{MeOH}$  90/10, 1.0 mL/min,  $\lambda = 254$  nm),  $t_R(\text{major}) = 13.73$  min,  $t_R(\text{minor}) = 12.01$  min.

$^1\text{H NMR}$  (400 MHz,  $\text{Chloroform-}d$ )  $\delta = 7.96$  (d,  $J = 8.4$  Hz, 2H), 7.58 (d,  $J = 8.4$  Hz, 2H), 7.23 – 7.05 (m, 4H), 6.92 (d,  $J = 7.6$  Hz,

1H), 4.57 (s, 1H), 4.26 – 4.11 (m, 3H), 3.52 (s, 3H), 3.33 – 3.21 (m, 2H), 2.78 (dd,  $J = 6.0, 2.4$  Hz, 1H), 2.23 (dd,  $J = 7.6, 4.0$  Hz, 1H), 2.06 (d,  $J = 8.8$  Hz, 1H), 1.28 – 1.20 (m, 9H) ppm.

$^{13}\text{C NMR}$  (101 MHz,  $\text{CDCl}_3$ )  $\delta = 201.2, 174.2, 173.1, 138.9, 138.5, 137.0, 132.4, 131.2, 130.2, 129.2, 128.3, 128.0, 127.5, 126.8, 126.0, 82.8, 80.5, 61.1, 53.2, 52.7, 51.2, 41.6, 39.3, 37.7, 36.2, 27.8, 23.7, 20.1, 14.2$  ppm.

ESI-HRMS calcd  $[\text{C}_{31}\text{H}_{30}\text{O}_5 + \text{Na}^+] = 505.1985$ , found 505.1985.

IR  $\tilde{\nu}$  ( $\text{cm}^{-1}$ ) 3026, 2906, 1718, 1676, 1601, 1444, 1227, 1193, 1026, 937, 838, 809, 735, 702, 532, 511.

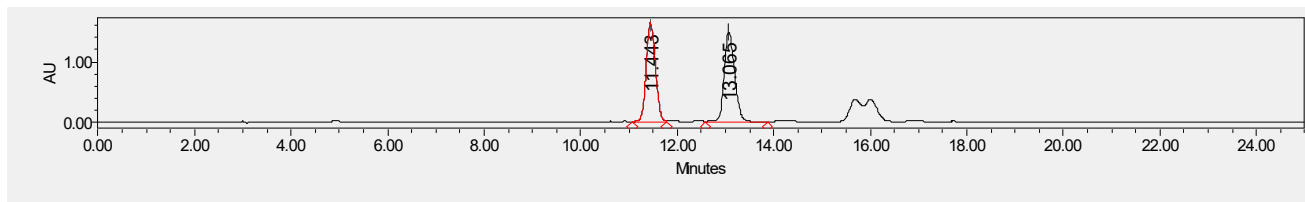

|   | Retention Time | Area     | % Area |
|---|----------------|----------|--------|
| 1 | 11.443         | 22162838 | 49.41  |
| 2 | 13.065         | 22693477 | 50.59  |

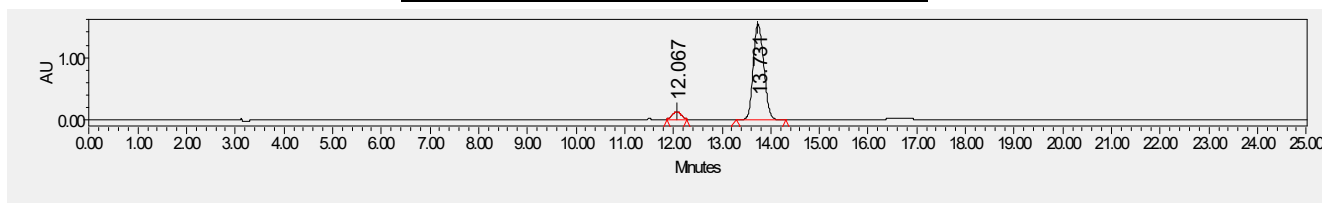

|   | Retention Time | Area     | % Area |
|---|----------------|----------|--------|
| 1 | 12.067         | 1491367  | 6.06   |
| 2 | 13.731         | 23101340 | 93.94  |



**3ap: 6-ethyl 3-methyl -7-([1,1'-biphenyl]-4-carbonyl)-1,9-dimethyl-3-phenyltricyclo [3.2.2.0<sup>2,4</sup>] non-8-ene-3,6-dicarboxylate**

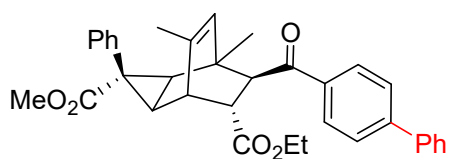

**3ap**

47.5 mg, 89% yield, 19:1dr, 93% ee.; light yellow solid, 91 – 92 °C,  $[\alpha]_D^{20} = -160.4$  ( $c = 0.71$ , in  $\text{CH}_2\text{Cl}_2$ )

HPLC (Daicel chiralcel OX-3,  $\text{CO}_2/\text{MeOH}$  90/10, 1.5 mL/min,  $\lambda = 254$  nm),  $t_R(\text{major}) = 7.90$  min,  $t_R(\text{minor}) = 9.35$  min.

$^1\text{H}$  NMR (400 MHz,  $\text{Chloroform-}d$ )  $\delta = 8.10$  (d,  $J = 8.4$  Hz, 2H), 7.71 (d,  $J = 8.4$  Hz, 2H), 7.68 – 7.62 (m, 2H), 7.48 (t,  $J = 7.4$  Hz,

2H), 7.40 (m, 1H), 7.26 – 7.08 (m, 4H), 6.95 (d,  $J = 7.6$  Hz, 1H), 4.61 (s, 1H), 4.31 (d,  $J = 6.0$  Hz, 1H), 4.19 (m, 2H), 3.54 (s, 3H), 3.32 – 3.26 (m, 1H), 2.83 (dd,  $J = 5.6, 2.0$  Hz, 1H), 2.27 (dd,  $J = 8.4, 4.0$  Hz, 1H), 2.11 (d,  $J = 8.8$  Hz, 1H), 1.34 – 1.23 (m, 9H) ppm.

$^{13}\text{C}$  NMR (101 MHz,  $\text{CDCl}_3$ )  $\delta = 201.5, 174.3, 173.2, 145.6, 139.8, 138.3, 137.8, 137.1, 131.2, 130.2, 129.4, 129.1, 129.0, 128.2, 128.0, 127.5, 127.3, 126.0, 61.1, 53.1, 52.7, 51.3, 41.6, 39.4, 37.9, 36.2, 27.9, 23.7, 20.1, 14.2$  ppm.

ESI-HRMS calcd [ $\text{C}_{35}\text{H}_{34}\text{O}_5 + \text{Na}^+$ ] = 557.2298, found 557.2297.

IR  $\tilde{\nu}$  (cm<sup>-1</sup>) 3029, 2958, 2872, 1720, 1673, 1601, 1445, 1373, 1228, 1192, 1027, 1002, 841, 808, 737, 699, 521.

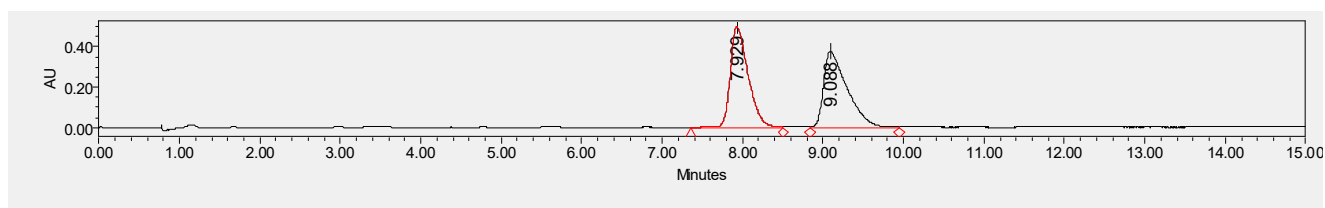

|   | Retention Time | Area    | % Area |
|---|----------------|---------|--------|
| 1 | 7.929          | 7644058 | 50.09  |
| 2 | 9.088          | 7616266 | 49.91  |

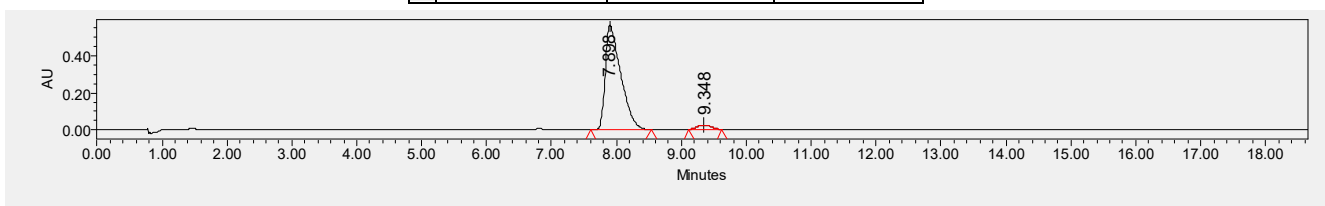

|   | Retention Time | Area    | % Area |
|---|----------------|---------|--------|
| 1 | 7.898          | 9355395 | 96.15  |
| 2 | 9.348          | 374849  | 3.85   |

**3aq: 6-ethyl 3-methyl -7-(3,4-dichlorobenzoyl)-1,9-dimethyl-3-phenyltricyclo[3.2.2.0<sup>2,4</sup>]non-8-ene-3,6-dicarboxylate**

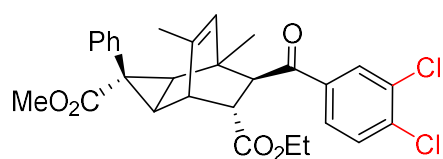

**3aq**

47.5 mg, 92% yield, 19:1 dr, 86% ee.; light yellow liquid,  $[\alpha]_D^{22} = -135.2$  ( $c = 0.89$ , in  $\text{CH}_2\text{Cl}_2$ ).

HPLC (Daicel chiralcel IA, *n*-hexane/*i*-PrOH 90/10, 1.0 mL/min,  $\lambda = 254$  nm),  $t_R(\text{major}) = 25.64$  min,  $t_R(\text{minor}) = 9.42$  min.

$^1\text{H NMR}$  (400 MHz, Chloroform-*d*)  $\delta = 8.07$  (d,  $J = 1.8$  Hz, 1H), 7.85 (dd,  $J = 8.4, 2.0$  Hz, 1H), 7.56 (d,  $J = 8.4$  Hz, 1H), 7.24 – 7.06

(m, 4H), 6.91 (d,  $J = 7.6$  Hz, 1H), 4.56 (s, 1H), 4.23 – 4.11 (m, 3H), 3.53 (s, 3H), 3.30 – 3.25 (m, 1H), 2.74 (dd,  $J = 5.6, 2.0$  Hz, 1H), 2.22 (dd,  $J = 8.4, 4.0$  Hz, 1H), 2.05 (d,  $J = 5.2$  Hz, 1H), 1.28 – 1.21 (m, 9H) ppm.

$^{13}\text{C NMR}$  (101 MHz,  $\text{CDCl}_3$ )  $\delta = 199.9, 174.1, 172.9, 138.7, 138.6, 137.6, 136.9, 133.4, 131.2, 130.8, 130.4, 130.2, 129.1, 128.0, 127.5, 127.5, 126.0, 61.3, 53.4, 52.8, 51.4, 41.7, 39.3, 37.6, 36.2, 27.7, 23.7, 20.1, 14.2$  ppm.

ESI-HRMS calcd  $[\text{C}_{29}\text{H}_{28}\text{Cl}_2\text{O}_5 + \text{Na}^+] = 549.1206, 551.1176, 553.1147$ , found 549.1211, 551.1173, 553.1151.

IR  $\tilde{\nu}$  (cm<sup>-1</sup>) 2959, 2873, 1720, 1681, 1582, 1555, 1442, 1377, 1230, 1198, 1028, 830, 735, 701.

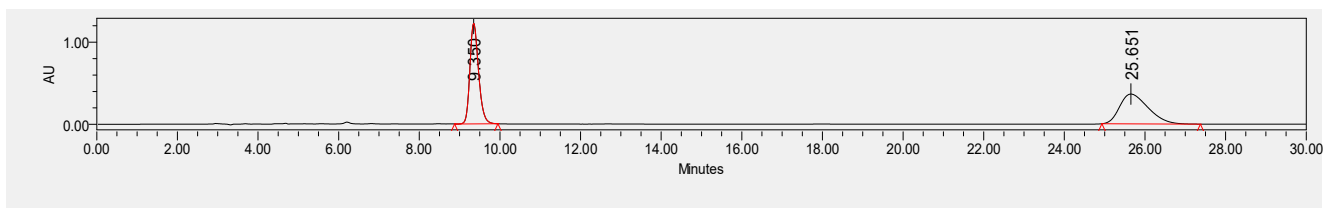

|   | Retention Time | Area     | % Area |
|---|----------------|----------|--------|
| 1 | 9.350          | 18256339 | 50.64  |
| 2 | 25.651         | 17793405 | 49.36  |

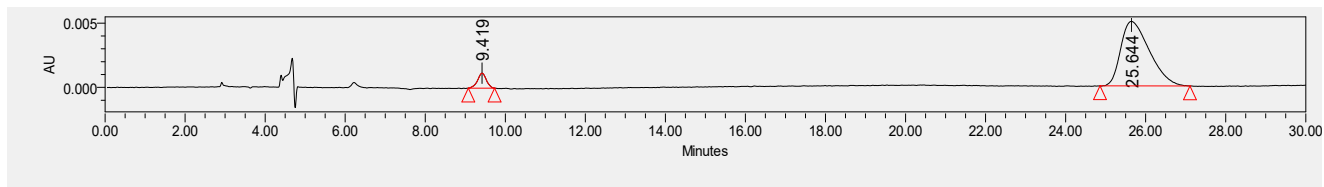

|   | Retention Time | Area   | % Area |
|---|----------------|--------|--------|
| 1 | 9.419          | 17693  | 6.61   |
| 2 | 25.644         | 250020 | 93.39  |

**3ar: 6-ethyl 3-methyl-7-(benzo[d][1,3]dioxole-5-carbonyl)-1,9-dimethyl-3-phenyltricyclo [3.2.2.0<sup>2,4</sup>]-non-8-ene-3,6-dicarboxylate**

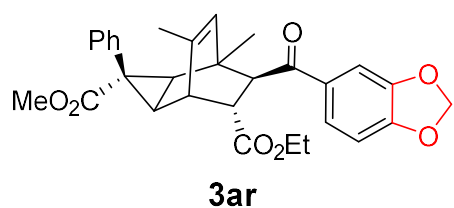

35.4 mg, 87% yield, 19:1 dr, 87% ee.; light yellow solid, 164 – 166 °C,  $[\alpha]_D^{20} = -126.6$  ( $c = 0.58$ , in  $\text{CH}_2\text{Cl}_2$ ).

HPLC (Daicel chiralcel IA, *n*-hexane/*i*-PrOH 90/10, 1.0 mL/min,  $\lambda = 254$  nm),  $t_R(\text{major}) = 26.84$  min,  $t_R(\text{minor}) = 21.7$  min.

$^1\text{H NMR}$  (400 MHz, Chloroform- $d$ )  $\delta = 7.69$  (d,  $J = 4.8$  Hz, 1H), 7.44 (s, 1H), 7.23 – 7.05 (m, 4H), 6.92 (d,  $J = 7.6$  Hz, 1H), 6.87 (d,

$J = 8.0$  Hz, 1H), 4.57 (s, 1H), 4.22 – 4.12 (m, 3H), 3.52 (s, 3H), 3.25 (s, 1H), 2.76 (dd,  $J = 5.6, 1.2$  Hz, 1H), 2.22 (dd,  $J = 9.2, 4.0$  Hz, 1H), 2.05 (d,  $J = 9.2$  Hz, 1H), 1.30 – 1.20 (m, 9H) ppm.

$^{13}\text{C NMR}$  (101 MHz,  $\text{CDCl}_3$ )  $\delta = 199.8, 174.3, 173.2, 151.8, 148.3, 138.1, 137.1, 134.1, 131.2, 130.2, 129.5, 128.0, 127.5, 126.0, 125.0, 108.1, 107.9, 101.9, 61.0, 52.8, 52.7, 51.3, 41.5, 39.4, 37.8, 36.14, 27.8, 23.6, 20.1, 14.3$  ppm.

ESI-HRMS calcd  $[\text{C}_{30}\text{H}_{30}\text{O}_7 + \text{H}^+] = 503.2064$ , found 503.2065

IR  $\tilde{\nu}$  ( $\text{cm}^{-1}$ ) 2959, 2905, 1719, 1667, 1439, 1372, 1233, 1191, 1128, 1098, 1034, 961, 933, 796, 701.

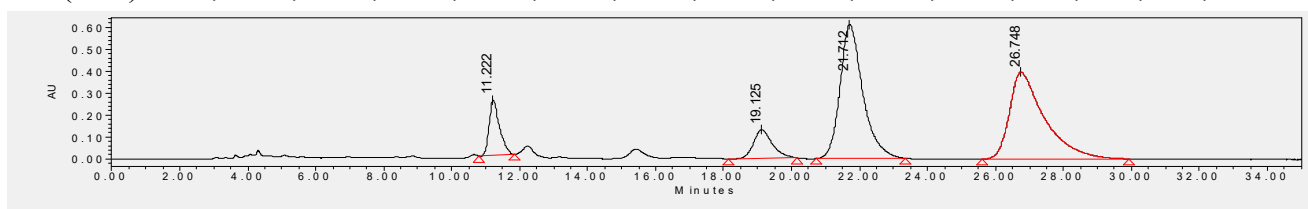

|   | Retention Time | Area     | % Area |
|---|----------------|----------|--------|
| 1 | 11.222         | 5361483  | 7.99   |
| 2 | 19.125         | 5022466  | 7.49   |
| 3 | 21.712         | 28404838 | 42.36  |
| 4 | 26.748         | 28272165 | 42.16  |

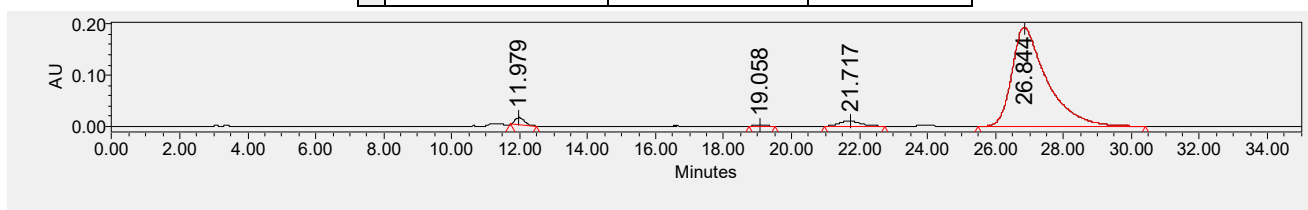

|   | Retention Time | Area     | % Area |
|---|----------------|----------|--------|
| 1 | 11.979         | 272900   | 1.88   |
| 2 | 19.058         | 41242    | 0.28   |
| 3 | 21.717         | 426657   | 2.94   |
| 4 | 26.844         | 13755144 | 94.89  |

**3as: 6-ethyl-3-methyl-7-(2-naphthoyl)-1,9-dimethyl-3-phenyltricyclo[3.2.2.0<sup>2,4</sup>]non-8-ene-3,6-dicarboxylate**

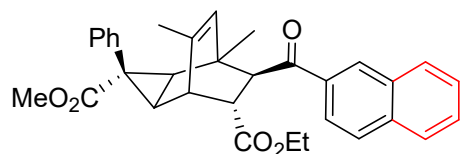

**3as**

45.7 mg, 90% yield, 19:1dr, 87% ee.; light yellow liquid,  $[\alpha]_D^{20} = -125.7$  ( $c = 0.75$ , in  $\text{CH}_2\text{Cl}_2$ ).

HPLC (Daicel chiralcel OX-3,  $\text{CO}_2/\text{MeOH}$  90/10, 1.5 mL/min,  $\lambda = 254$  nm),  $t_R(\text{major}) = 5.42$  min,  $t_R(\text{minor}) = 6.37$  min.

$^1\text{H NMR}$  (600 MHz,  $\text{Chloroform-}d$ )  $\delta = 8.61$  (s, 1H), 8.03 (t,  $J = 7.8$  Hz, 2H), 7.89 (t,  $J = 9.0$  Hz, 2H), 7.64 – 7.56 (m, 2H), 7.21 (m, 2H), 7.16 – 7.09 (m, 2H), 6.94 (d,  $J = 7.2$  Hz, 1H), 4.62 (s, 1H), 4.44 (d,  $J = 6.0$  Hz, 1H), 4.23 – 4.11 (m, 2H), 3.54 (s, 3H), 3.34 – 3.29 (m, 1H), 2.88 (dd,  $J = 6.0, 1.8$  Hz, 1H), 2.30 (dd,  $J = 9.0, 4.2$ , Hz, 1H), 2.15 (d,  $J = 6.0$  Hz, 1H), 1.30 – 1.25 (m, 6H), 1.23 (m, 3H) ppm.

$^{13}\text{C NMR}$  (151 MHz,  $\text{CDCl}_3$ )  $\delta = 201.8, 174.3, 173.3, 138.4, 137.0, 136.5, 135.5, 132.6, 131.2, 130.4, 130.3, 129.8, 129.4, 128.6, 128.5, 128.0, 127.7, 127.5, 126.8, 126.0, 124.1, 61.1, 53.1, 52.8, 51.2, 41.7, 39.4, 38.0, 36.2, 28.0, 23.8, 20.2, 14.2$  ppm.

ESI-HRMS calcd  $[\text{C}_{33}\text{H}_{32}\text{O}_5 + \text{Na}^+] = 531.2142$ , found 513.2147.

IR  $\tilde{\nu}$  (cm<sup>-1</sup>) 3057, 3025, 2957, 1718, 1671, 1626, 1440, 1376, 1271, 1230, 1187, 1058, 1025, 961, 863, 735, 701, 514, 476.

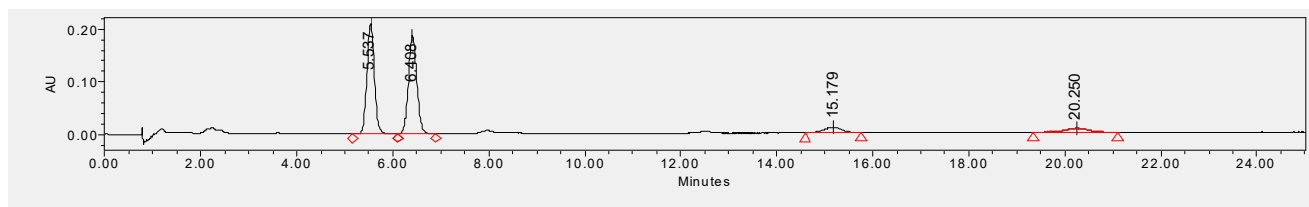

|   | Retention Time | Area    | % Area |
|---|----------------|---------|--------|
| 1 | 5.537          | 2301514 | 44.94  |
| 2 | 6.408          | 2272436 | 44.37  |
| 3 | 15.179         | 285822  | 5.58   |
| 4 | 20.250         | 261547  | 5.11   |

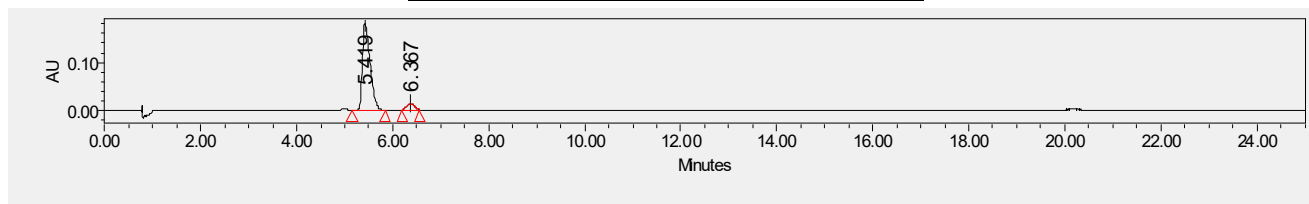

|   | Retention Time | Area    | % Area |
|---|----------------|---------|--------|
| 1 | 5.419          | 2011529 | 93.16  |
| 2 | 6.367          | 147735  | 6.84   |

**3at: dimethyl-7-benzoyl-1,9-dimethyl-3-phenyltricyclo[3.2.2.0<sup>2,4</sup>]non-8-ene-3,6-dicarboxylate**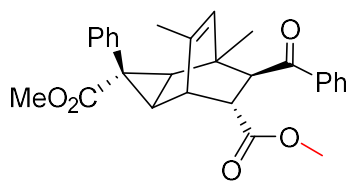**3at**

22.2 mg, 88% yield, 19:1 dr, 88% ee.; light yellow liquid,  $[\alpha]_D^{21} = -123.8$  ( $c = 0.52$ , in  $\text{CH}_2\text{Cl}_2$ ).

HPLC (Daicel chiralcel IA, *n*-hexane/*i*-PrOH 90/10, 1.0 mL/min,  $\lambda = 254$  nm),  $t_R(\text{major}) = 14.31$  min,  $t_R(\text{minor}) = 8.93$  min.

$^1\text{H NMR}$  (400 MHz, Chloroform-*d*)  $\delta = 8.01$  (d,  $J = 7.6$  Hz, 2H), 7.57 (t,  $J = 8.0$  Hz, 1H), 7.48 (t,  $J = 7.6$  Hz, 2H), 7.24 – 7.05 (m, 4H), 6.92 (d,  $J = 7.4$  Hz, 1H), 4.57 (s, 1H), 4.27 (d,  $J = 6.0$  Hz, 1H), 3.72 (s, 3H), 3.53 (s,

3H), 3.32 – 3.24 (m, 1H), 2.84 (dd,  $J = 6.0, 1.8$  Hz, 1H), 2.23 (dd,  $J = 9.0, 4.2$  Hz, 1H), 2.07 (d,  $J = 9.1$  Hz, 1H), 1.25 (d,  $J = 11.4$  Hz, 6H).

$^{13}\text{C NMR}$  (151 MHz,  $\text{CDCl}_3$ )  $\delta = 201.9, 174.2, 173.3, 139.2, 138.3, 137.10, 133.0, 131.2, 130.3, 129.4, 128.7, 128.5, 128.02, 127.5, 126.0, 65.0, 53.1, 52.7, 51.3, 41.6, 39.4, 37.8, 36.2, 30.6, 27.8, 23.7, 20.1, 19.2, 13.7$  ppm.

ESI-HRMS calcd  $[\text{C}_{28}\text{H}_{28}\text{O}_5 + \text{Na}^+] = 467.1829$ , found 467.1828.

IR  $\tilde{\nu}$  ( $\text{cm}^{-1}$ ) 3057, 2955, 1718, 1674, 1597, 1439, 1374, 1301, 1267, 1225, 1128, 1058, 1018, 961, 850, 732, 696, 628.

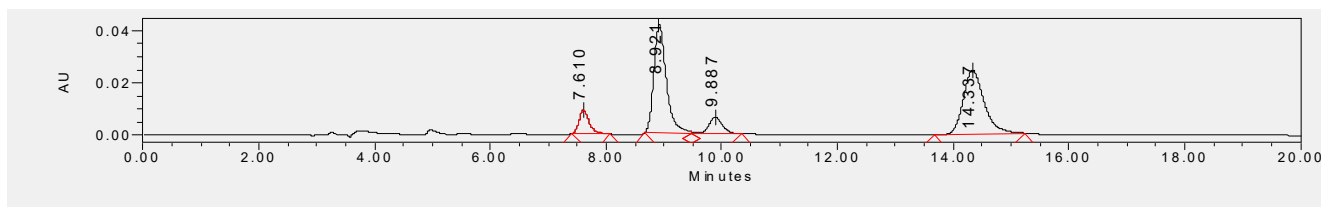

|   | Retention | Area   | % Area |
|---|-----------|--------|--------|
| 1 | 7.610     | 111150 | 7.60   |
| 2 | 8.921     | 627567 | 42.90  |
| 3 | 9.887     | 104721 | 7.16   |
| 4 | 14.337    | 619323 | 42.34  |

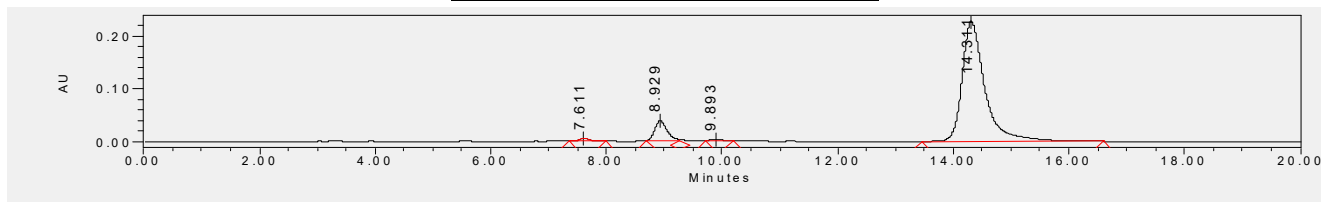

|   | Retention | Area    | % Area |
|---|-----------|---------|--------|
| 1 | 7.611     | 67787   | 0.98   |
| 2 | 8.929     | 541955  | 7.86   |
| 3 | 9.893     | 37968   | 0.55   |
| 4 | 14.311    | 6245987 | 90.60  |

**3au: 6-butyl 3-methyl -7-benzoyl-1,9-dimethyl-3-phenyltricyclo[3.2.2.0<sup>2,4</sup>]non-8-ene-3,6-dicarboxylate**

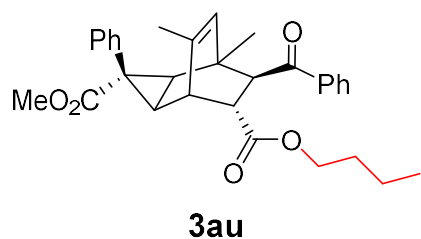

44.2 mg, 91% yield, 19:1 dr, 93% ee.; light yellow solid, 96 – 98 °C,  $[\alpha]_D^{21} = -143.5$  ( $c = 0.48$ , in  $\text{CH}_2\text{Cl}_2$ ).

HPLC (Daicel chiralcel OX-3,  $\text{CO}_2/\text{MeOH}$  90/10, 1.5 mL/min,  $\lambda = 254$  nm),  $t_R(\text{major}) = 2.95$  min,  $t_R(\text{minor}) = 3.79$  min.

$^1\text{H NMR}$  (600 MHz,  $\text{Chloroform-}d$ )  $\delta = 8.01$  (d,  $J = 7.2$  Hz, 2H), 7.56 (t,  $J = 7.2$  Hz, 1H), 7.47 (t,  $J = 6.0$  Hz, 2H), 7.20 (m, 2H), 7.13 (t,

$J = 7.2$  Hz, 1H), 7.08 (d,  $J = 5.2$  Hz, 1H), 6.93 (d,  $J = 7.8$  Hz, 1H), 4.58 (s, 1H), 4.26 (d,  $J = 6.0$  Hz, 1H), 4.12 (m, 2H), 3.53 (s, 3H), 3.28 – 3.24 (m, 1H), 2.81 (dd,  $J = 6.0, 1.8$  Hz, 1H), 2.25 (dd,  $J = 9.0, 4.2$  Hz, 1H), 2.07 (d,  $J = 6.0$  Hz, 1H), 1.57 (m, 2H), 1.32 – 1.26 (m, 5H), 1.24 (d,  $J = 1.2$  Hz, 3H), 0.88 (t,  $J = 7.2$  Hz, 3H) ppm.

$^{13}\text{C NMR}$  (151 MHz,  $\text{CDCl}_3$ )  $\delta = 201.9, 174.2, 173.3, 139.2, 138.3, 137.10, 133.0, 131.2, 130.3, 129.4, 128.7, 128.5, 128.02, 127.5, 126.0, 65.0, 53.1, 52.7, 51.3, 41.6, 39.4, 37.8, 36.2, 30.6, 27.8, 23.7, 20.1, 19.2, 13.7$  ppm.

ESI-HRMS calcd  $[\text{C}_{31}\text{H}_{34}\text{O}_5 + \text{Na}^+] = 509.2299$ , found 509.2299.

IR  $\tilde{\nu}$  (cm<sup>-1</sup>) 3058, 3026, 1719, 1676, 1496, 1446, 1374, 1301, 1267, 1225, 1128, 961, 891, 808, 780, 696, 515.

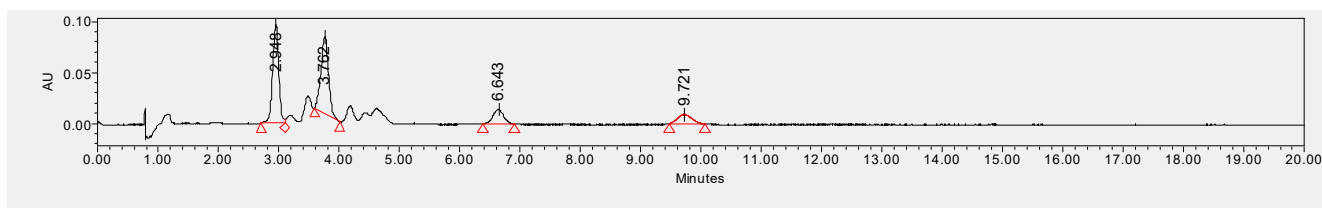

|   | Retention Time | Area   | % Area |
|---|----------------|--------|--------|
| 1 | 2.948          | 675678 | 40.44  |
| 2 | 3.762          | 672807 | 40.27  |
| 3 | 6.643          | 171620 | 10.27  |
| 4 | 9.721          | 150536 | 9.01   |

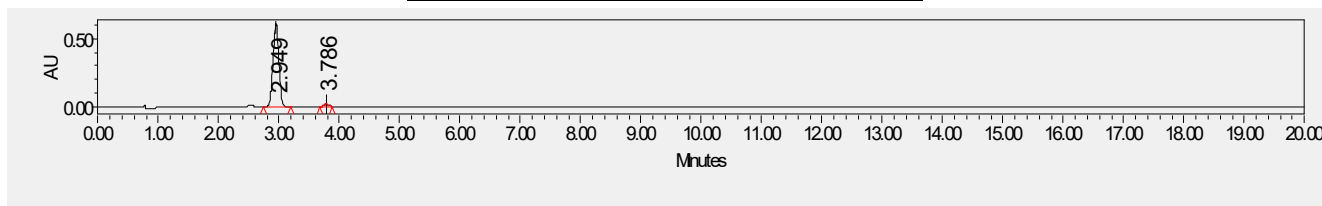

|   | Retention Time | Area    | % Area |
|---|----------------|---------|--------|
| 1 | 2.949          | 4361148 | 96.76  |
| 2 | 3.786          | 146098  | 3.24   |

**3av: 6-isopropyl 3-methyl -7-benzoyl-1,9-dimethyl-3-phenyltricyclo[3.2.2.0<sup>2,4</sup>]non-8-ene-3,6-dicarboxylate**

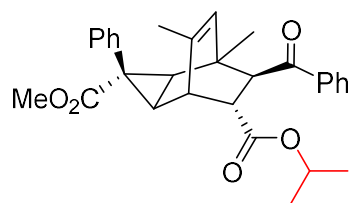

**3av**

37.4 mg, 79% yield, 19:1 dr, 93% ee.; light yellow liquid,  $[\alpha]_D^{22} = -126.7$  ( $c = 0.42$ , in  $\text{CH}_2\text{Cl}_2$ ).

HPLC (Daicel chiralcel OX-3,  $\text{CO}_2/\text{MeOH}$  95/5, 1.5 mL/min,  $\lambda = 254$  nm),  $t_R(\text{major}) = 4.42$  min,  $t_R(\text{minor}) = 6.42$  min.

$^1\text{H NMR}$  (600 MHz,  $\text{Chloroform-}d$ )  $\delta = 8.01$  (d,  $J = 7.8$  Hz, 2H), 7.56 (t,  $J = 7.2$  Hz, 1H), 7.47 (t,  $J = 5.2$  Hz, 2H), 7.20 (m, 2H), 7.13 (t,  $J = 7.2$  Hz, 1H), 7.09 (d,  $J = 4.0$  Hz, 1H), 6.93 (d,  $J = 7.6$  Hz, 1H), 5.05 (m, 1H), 4.58 (s, 1H), 4.26 (d,  $J = 4.8$  Hz, 1H), 3.53 (s, 3H), 3.28 – 3.21 (m, 1H), 2.76 (dd,  $J = 5.4, 1.8$  Hz, 1H), 2.24 (dd,  $J = 7.2, 4.2$  Hz, 1H), 2.07 (d,  $J = 7.2$  Hz, 1H), 1.28 – 1.19 (m, 12H) ppm.

$^{13}\text{C NMR}$  (151 MHz,  $\text{CDCl}_3$ )  $\delta = 202.1, 174.3, 172.7, 139.2, 138.3, 137.1, 133.0, 131.2, 130.3, 129.4, 128.6, 128.5, 128.0, 127.5, 126.0, 68.5, 53.1, 52.7, 51.4, 41.5, 39.4, 37.8, 36.1, 27.9, 23.9, 21.9, 21.9, 20.1$  ppm.

ESI-HRMS calcd  $[\text{C}_{30}\text{H}_{32}\text{O}_5 + \text{Na}^+] = 495.2142$ , found 495.2142.

IR  $\tilde{\nu}$  (cm<sup>-1</sup>) 3058, 3026, 1720, 1677, 1598, 1447, 1374, 1374, 1268, 1229, 1106, 1058, 962, 940, 807, 780, 697.

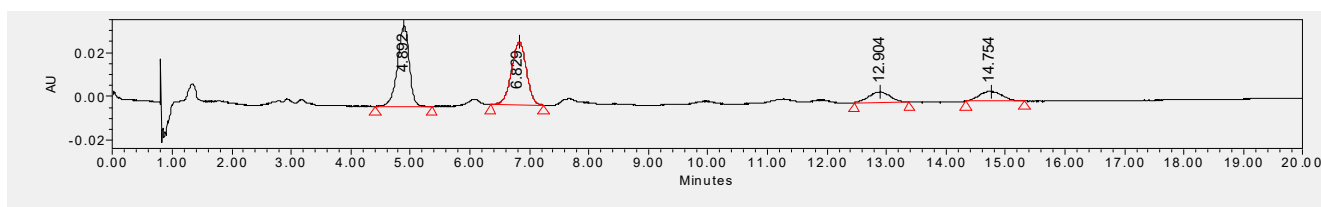

|   | Retention Time | Area   | % Area |
|---|----------------|--------|--------|
| 1 | 4.892          | 508044 | 41.01  |
| 2 | 6.829          | 499016 | 40.28  |
| 3 | 12.904         | 116420 | 9.40   |
| 4 | 14.754         | 115470 | 9.32   |

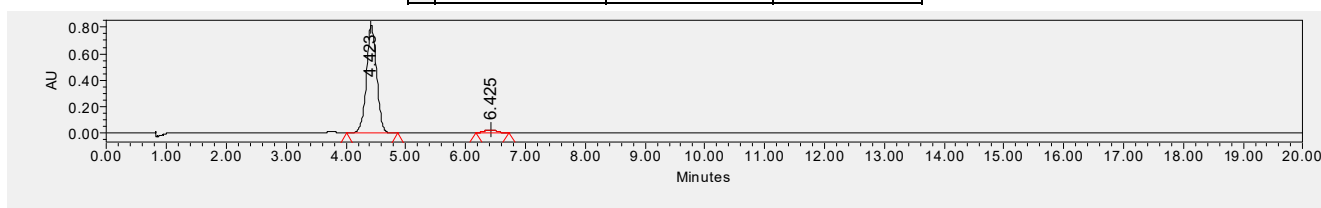

|   | Retention Time | Area    | % Area |
|---|----------------|---------|--------|
| 1 | 4.423          | 9738475 | 96.50  |
| 2 | 6.425          | 352741  | 3.50   |

**3aw: 6-benzyl 3-methyl -7-benzoyl-1,9-dimethyl-3-phenyltricyclo[3.2.2.0<sup>2,4</sup>]non-8-ene-3,6-dicarboxylate**

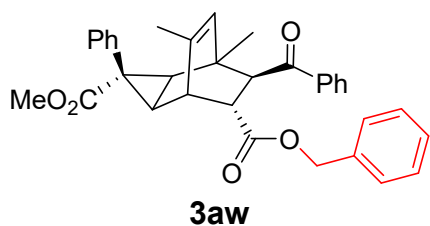

48.1 mg, 92% yield, 19:1 dr, 94% ee.; light yellow liquid,  $[\alpha]_D^{22} = -105.3$  ( $c = 0.66$ , in  $\text{CH}_2\text{Cl}_2$ ).

HPLC (Daicel chiralcel IA, *n*-hexane/*i*-PrOH 90/10, 1.5 mL/min,  $\lambda = 254$  nm),  $t_R(\text{major}) = 11.68$  min,  $t_R(\text{minor}) = 14.39$  min.

$^1\text{H NMR}$  (400 MHz, Chloroform-*d*)  $\delta = 7.94$  (d,  $J = 7.6$  Hz, 2H), 7.54 (t,  $J = 7.2$  Hz, 1H), 7.41 (t,  $J = 7.6$  Hz, 2H), 7.34 – 7.05 (m, 10H), 6.92 (d,  $J = 7.4$  Hz, 1H), 5.22 – 5.08 (m, 2H), 4.57 (s, 1H), 4.27 (d,  $J = 5.6$  Hz, 1H), 3.52 (s, 3H), 3.29 (s, 1H), 2.88 (d,  $J = 6.0$  Hz, 1H), 2.24 (dd,  $J = 9.0, 4.0$  Hz, 1H), 2.08 (d,  $J = 9.2$  Hz, 1H), 1.24 (d,  $J = 14.4$  Hz, 6H) ppm.

$^{13}\text{C NMR}$  (101 MHz,  $\text{CDCl}_3$ )  $\delta = 201.8, 174.2, 173.1, 139.1, 138.2, 137.01, 135.6, 132.9, 131.1, 130.2, 129.4, 128.6, 128.6, 128.5, 128.3, 128.0, 127.5, 126.0, 66.9, 53.1, 52.7, 51.1, 41.6, 39.3, 37.7, 36.2, 27.8, 23.7, 20.1$  ppm.

ESI-HRMS calcd  $[\text{C}_{35}\text{H}_{34}\text{O}_5 + \text{Na}^+] = 557.2298$ , found 557.2300.

IR  $\tilde{\nu}$  (cm<sup>-1</sup>) 3029, 2837, 1722, 1677, 1598, 1447, 1373, 1220, 1099, 1025, 808, 721, 696, 508.

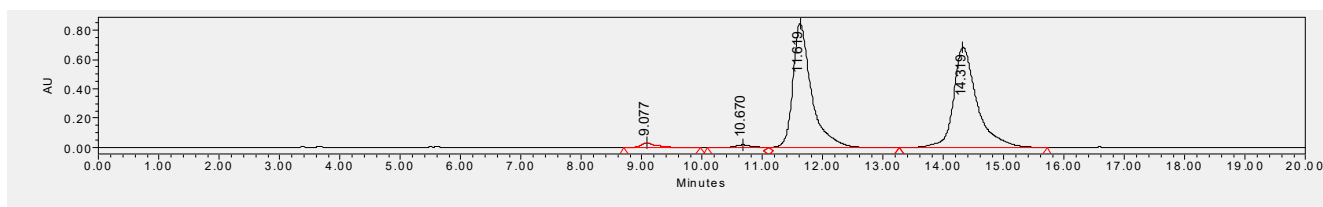

|   | Retention Time | Area     | % Area |
|---|----------------|----------|--------|
| 1 | 9.077          | 538650   | 1.45   |
| 2 | 10.670         | 330802   | 0.89   |
| 3 | 11.619         | 17962459 | 48.32  |
| 4 | 14.319         | 18344199 | 49.34  |

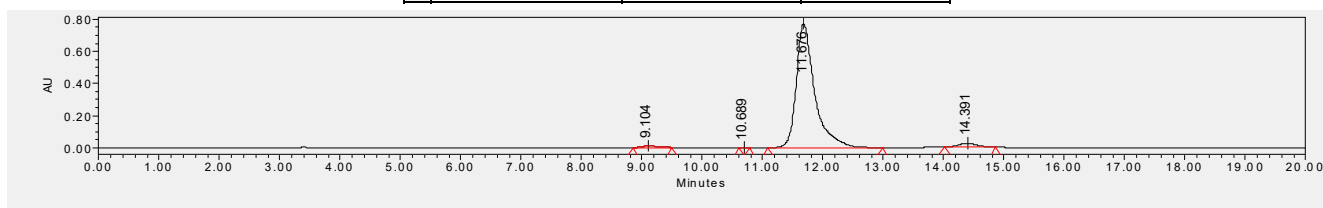

|   | Retention Time | Area     | % Area |
|---|----------------|----------|--------|
| 1 | 9.104          | 191991   | 1.13   |
| 2 | 10.689         | 1295     | 0.01   |
| 3 | 11.676         | 16355488 | 96.17  |
| 4 | 14.391         | 458683   | 2.70   |



**3ba: 6-ethyl 3-methyl -7-benzoyl-3-(4-chlorophenyl)-1,9-dimethyltricyclo[3.2.2.0<sup>2,4</sup>]non-8-ene-3,6-dicarboxylate**

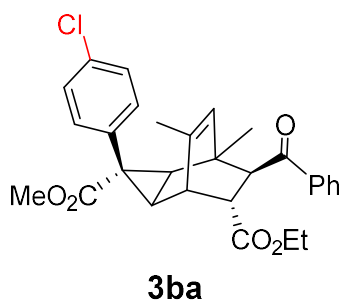

28.6 mg, 58% yield, 19:1 dr, 91% ee.; light yellow solid, 135 – 138 °C,  $[\alpha]_D^{20} = -221.7$  ( $c = 0.30$ , in  $\text{CH}_2\text{Cl}_2$ ).

HPLC (Daicel chiralcel OX-3,  $\text{CO}_2/\text{MeOH}$  90/10, 1.5 mL/min,  $\lambda = 254$  nm),  $t_R(\text{major}) = 3.10$  min,  $t_R(\text{minor}) = 3.98$  min.

$^1\text{H NMR}$  (600 MHz,  $\text{Chloroform-}d$ )  $\delta = 8.00$  (d,  $J = 1.8$  Hz, 2H), 7.57 (t,  $J = 7.2$  Hz, 1H), 7.47 (t,  $J = 7.8$  Hz, 2H), 7.18 (m, Hz, 2H), 7.01 (dd,  $J = 8.4$ , 1.8 Hz, 1H), 6.85 (dd,  $J = 8.4$ , 1.8 Hz, 1H), 4.61 (s, 1H), 4.25 (d,  $J = 6.0$  Hz, 1H), 4.17 (m, 2H), 3.53 (s, 3H), 3.28 – 3.23 (m, 1H), 2.81 (dd,  $J = 6.0$ , 1.8 Hz, 1H), 2.24 (dd,  $J = 9.0$ , 3.6 Hz, 1H), 2.08 (d,  $J = 9.6$  Hz, 1H), 1.28 – 1.21 (m, 9H) ppm.

$^{13}\text{C NMR}$  (151 MHz,  $\text{CDCl}_3$ )  $\delta = 201.8$ , 173.8, 173.1, 139.1, 138.4, 135.8, 133.1, 132.5, 131.7, 131.4, 129.7, 128.7, 128.5, 128.1, 127.8, 61.1, 53.0, 52.8, 51.2, 41.5, 39.3, 37.9, 35.5, 27.9, 23.7, 20.2, 14.2 ppm.

ESI-HRMS calcd  $[\text{C}_{29}\text{H}_{29}\text{ClO}_5 + \text{Na}^+] = 515.1595$ , 517.1566, found 515.1595, 517.1566.

IR  $\tilde{\nu}$  (cm<sup>-1</sup>) 2906, 1723, 1677, 1596, 1492, 1446, 1374, 1301, 1269, 1230, 1193, 1092, 962, 838, 718, 525.

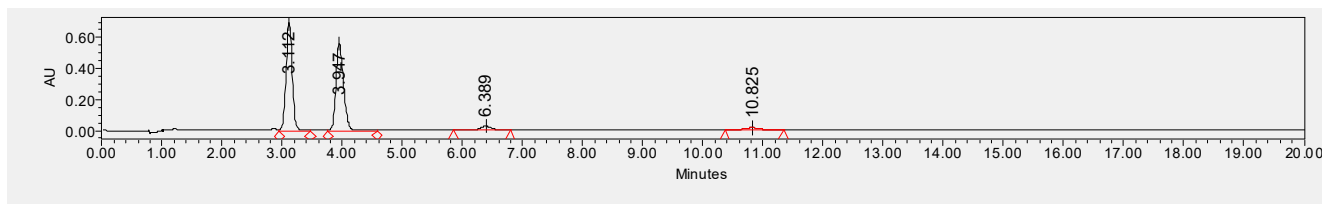

|   | Retention Time | Area    | % Area |
|---|----------------|---------|--------|
| 1 | 3.112          | 5130351 | 46.91  |
| 2 | 3.947          | 5112293 | 46.75  |
| 3 | 6.389          | 376199  | 3.44   |
| 4 | 10.825         | 316630  | 2.90   |

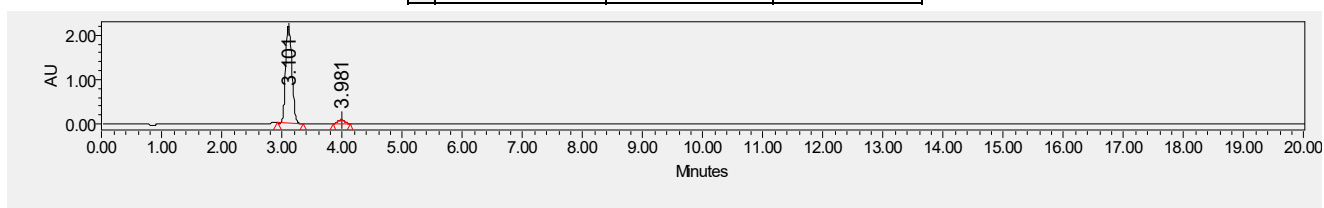

|   | Retention Time | Area     | % Area |
|---|----------------|----------|--------|
| 1 | 3.101          | 16265457 | 95.89  |
| 2 | 3.981          | 696305   | 4.11   |

**3ca: 6-ethyl 3-methyl -7-benzoyl-3-(4-bromophenyl)-1,9-dimethyltricyclo[3.2.2.0<sup>2,4</sup>]non-8-ene-3,6-dicarboxylate**

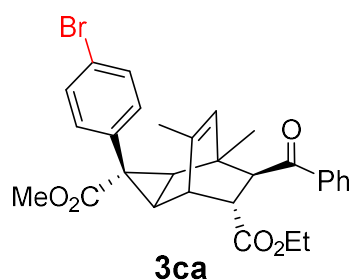

47.2 mg, 88% yield, 19:1 dr, 93% ee.; light yellow solid, 145 – 146 °C,  $[\alpha]_D^{20} = -144.8$  ( $c = 0.59$ , in  $\text{CH}_2\text{Cl}_2$ ).

HPLC (Daicel chiralcel OX-3,  $\text{CO}_2/\text{MeOH}$  90/10, 1.5 mL/min,  $\lambda = 254$  nm),  $t_R(\text{major}) = 3.52$  min,  $t_R(\text{minor}) = 4.61$  min.

$^1\text{H NMR}$  (400 MHz,  $\text{Chloroform-}d$ )  $\delta = 8.05 - 7.97$  (m, 2H), 7.57 (t,  $J = 7.2$  Hz, 1H), 7.47 (t,  $J = 7.6$  Hz, 2H), 7.32 (ddd,  $J = 15.8, 8.2, 2.0$  Hz, 2H), 6.95 (dd,  $J = 8.0, 2.4$  Hz, 1H), 6.80 (dd,  $J = 8.4, 2.4$  Hz, 1H), 4.61 (s, 1H),

4.25 (d,  $J = 6.0$  Hz, 1H), 4.17 (m, 2H), 3.52 (s, 3H), 3.29 – 3.21 (m, 1H), 2.80 (dd,  $J = 5.6, 2.0$  Hz, 1H), 2.24 (dd,  $J = 8.8, 4.0$  Hz, 1H), 2.07 (d,  $J = 9.2$  Hz, 1H), 1.30 – 1.19 (m, 9H) ppm.

$^{13}\text{C NMR}$  (101 MHz,  $\text{CDCl}_3$ )  $\delta = 201.8, 173.7, 173.1, 139.1, 138.3, 136.4, 133.0, 132.9, 131.8, 131.0, 130.7, 129.8, 128.7, 128.5, 119.7, 61.1, 53.0, 52.8, 51.2, 41.5, 39.3, 37.9, 35.6, 27.9, 23.7, 20.2, 14.2$  ppm.

ESI-HRMS calcd  $[\text{C}_{29}\text{H}_{29}\text{BrO}_5 + \text{Na}^+]$  = 559.1091, 561.1070, found 559.1090, 561.1069.

IR  $\tilde{\nu}$  ( $\text{cm}^{-1}$ ) 2906, 1720, 1676, 1488, 1445, 1373, 1268, 1228, 1192, 1067, 1009, 826, 766, 721, 691, 515.

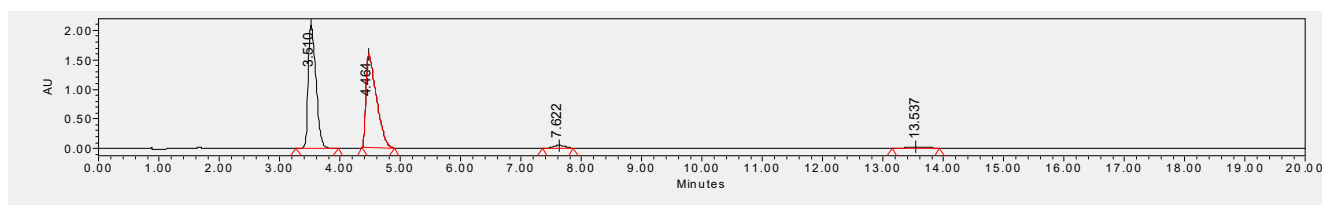

|   | Retention Time | Area     | % Area |
|---|----------------|----------|--------|
| 1 | 3.510          | 18372113 | 47.52  |
| 2 | 4.464          | 19011227 | 49.18  |
| 3 | 7.622          | 664456   | 1.72   |
| 4 | 13.537         | 612139   | 1.58   |

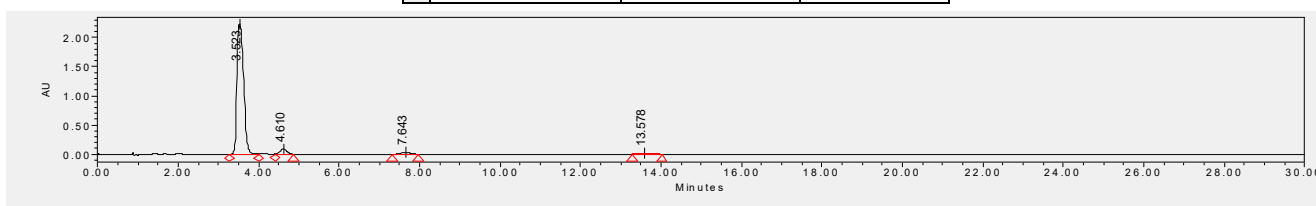

|   | Retention Time | Area     | % Area |
|---|----------------|----------|--------|
| 1 | 3.523          | 25849325 | 93.12  |
| 2 | 4.610          | 1068868  | 3.85   |
| 3 | 7.643          | 479449   | 1.73   |
| 4 | 13.578         | 361762   | 1.30   |

**3da: 6-ethyl 3-methyl -7-benzoyl-3-(4-iodophenyl)-1,9-dimethyltricyclo[3.2.2.0<sub>2,4</sub>]non-8-ene-3,6-dicarboxylate**

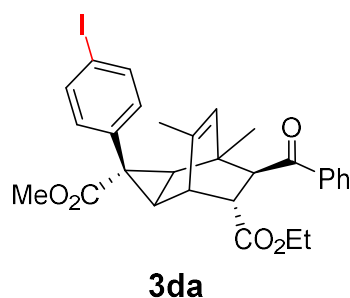

47.2 mg, 88% yield, 19:1 dr, 95% ee.; light yellow solid, 146 – 148 °C,,  
[ $\alpha$ ]<sub>D</sub><sup>21</sup> = -150.3 (*c* = 0.79, in CH<sub>2</sub>Cl<sub>2</sub>).

HPLC (Daicel chiralcel OX-3, CO<sub>2</sub>/MeOH 90/10, 1.5 mL/min,  $\lambda$  = 254 nm), *t*<sub>R</sub>(major) = 4.76 min, *t*<sub>R</sub>(minor) = 6.10 min.

<sup>1</sup>H NMR (400 MHz, Chloroform-*d*)  $\delta$  = 8.00 (d, *J* = 7.2 Hz, 2H), 7.67 – 7.41 (m, 5H), 6.82 (dd, *J* = 8.0, 2.4 Hz, 1H), 6.67 (dd, *J* = 6.0, 2.0 Hz, 1H), 4.61 (s, 1H), 4.25 (d, *J* = 6.0 Hz, 1H), 4.16 (m, 2H), 3.52 (s, 3H), 3.30 – 3.19 (m, 1H), 2.80 (dd, *J* = 6.0, 2.0 Hz, 1H), 2.23 (dd, *J* = 9.2, 4.0 Hz, 1H),

2.07 (d, *J* = 9.2 Hz, 1H), 1.30 – 1.20 (m, 9H) ppm.

<sup>13</sup>C NMR (101 MHz, CDCl<sub>3</sub>)  $\delta$  = 201.8, 173.7, 173.0, 139.1, 138.4, 137.1, 137.0, 136.6, 133.2, 133.0, 132.1, 129.8, 128.7, 128.5, 91.1, 61.1, 53.0, 52.8, 51.1, 41.5, 39.2, 37.9, 35.7, 27.9, 23.7, 20.2, 14.2 ppm.

ESI-HRMS calcd [C<sub>29</sub>H<sub>29</sub>IO<sub>5</sub>+Na<sup>+</sup>] = 607.0952, found 607.0952.

IR  $\tilde{\nu}$  (cm<sup>-1</sup>) 2955, 2872, 1723, 1677, 1595, 1446, 1373, 1230, 1193, 1060, 1029, 961, 822, 764, 720.

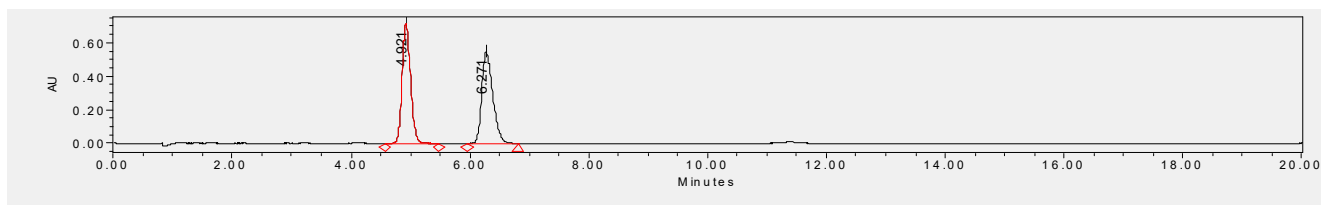

|   | Retention Time | Area    | % Area |
|---|----------------|---------|--------|
| 1 | 4.921          | 7064060 | 50.07  |
| 2 | 6.271          | 7044599 | 49.93  |

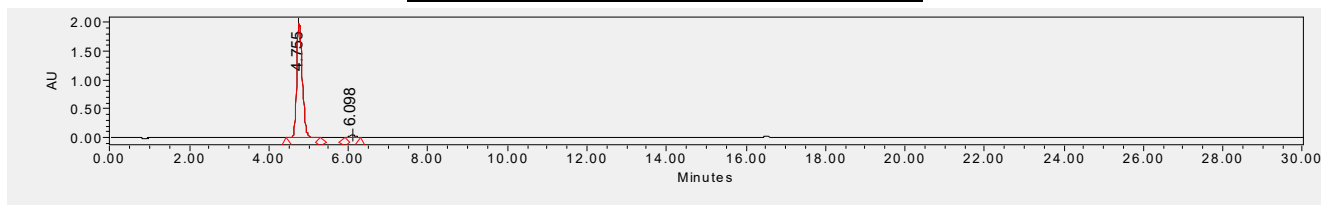

|   | Retention Time | Area     | % Area |
|---|----------------|----------|--------|
| 1 | 4.755          | 19427944 | 97.77  |
| 2 | 6.098          | 443277   | 2.23   |

**3ea: 6-ethyl 3-methyl -7-benzoyl-1,9-dimethyl-3-(p-tolyl)tricyclo[3.2.2.0<sup>2,4</sup>]non-8-ene-3,6-dicarboxylate**

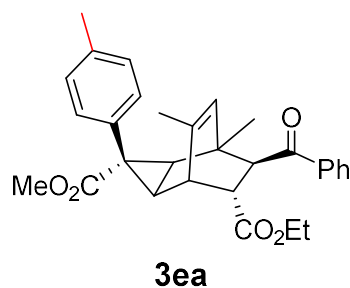

45.1 mg, 98% yield, 19:1 dr, 85% ee.; light yellow liquid,  $[\alpha]_D^{20} = -146.1$  ( $c = 0.66$ , in  $\text{CH}_2\text{Cl}_2$ ).

HPLC (Daicel chiralcel OX-3,  $\text{CO}_2/\text{MeOH}$  90/10, 1.5 mL/min,  $\lambda = 254$  nm),  $t_R(\text{major}) = 3.38$ , min,  $t_R(\text{minor}) = 4.30$  min

$^1\text{H}$  NMR (400 MHz,  $\text{CHCl}_3$ )  $\delta = 8.01$  (d,  $J = 7.6$  Hz, 2H), 7.56 (t,  $J = 7.2$  Hz, 1H), 7.47 (t,  $J = 8.0$  Hz, 2H), 6.99 (m, 3H), 6.84 – 6.77 (m, 1H), 4.58 (s, 1H), 4.26 (d,  $J = 6.0$  Hz, 1H), 4.23 – 4.11 (m, 2H), 3.52 (s, 3H),

3.29 – 3.24 (m, 1H), 2.80 (dd,  $J = 6.0, 2.4$  Hz, 1H), 2.30 (s, 3H), 2.22 (dd,  $J = 9.2, 4.0$  Hz, 1H), 2.04 (d,  $J = 9.2$  Hz, 1H), 1.30 – 1.20 (m, 9H) ppm.

$^{13}\text{C}$  NMR (101 MHz,  $\text{CDCl}_3$ )  $\delta = 202.0, 174.4, 173.2, 139.3, 138.2, 135.3, 133.8, 132.9, 131.0, 130.1, 129.1, 128.6, 128.6, 128.4, 128.3, 61.0, 53.1, 52.7, 51.26, 41.6, 39.4, 37.7, 35.8, 27.7, 23.7, 21.2, 20.1, 14.2$  ppm.

ESI-HRMS calcd  $[\text{C}_{30}\text{H}_{32}\text{O}_5 + \text{Na}^+] = 495.2142$ , found 495.2143.

IR  $\tilde{\nu}$  ( $\text{cm}^{-1}$ ) 2958, 1719, 1676, 1445, 1373, 1226, 1190, 1022, 999, 938, 896, 819, 760, 691, 617, 522.

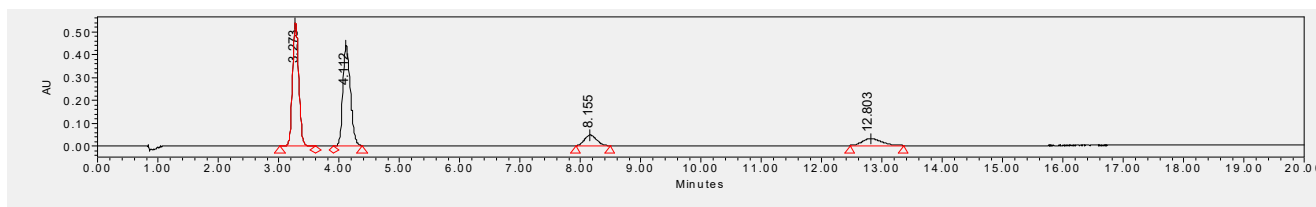

|   | Retention Time | Area    | % Area |
|---|----------------|---------|--------|
| 1 | 3.273          | 3806681 | 42.72  |
| 2 | 4.112          | 3789900 | 42.53  |
| 3 | 8.155          | 664212  | 7.45   |
| 4 | 12.803         | 650394  | 7.30   |

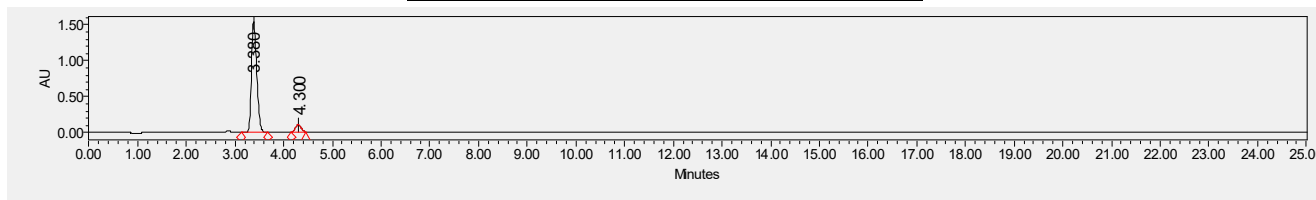

|   | Retention Time | Area     | % Area |
|---|----------------|----------|--------|
| 1 | 3.380          | 11512842 | 92.97  |
| 2 | 4.300          | 870022   | 7.03   |

**3fa: 6-ethyl 3-methyl -7-benzoyl-3-(4-methoxyphenyl)-1,9-dimethyltricyclo[3.2.2.0<sup>2,4</sup>]non-8-ene-3,6-dicarboxylate**

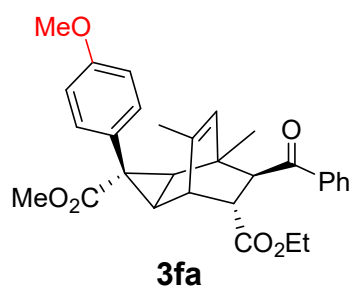

43.1 mg, 89% yield, 19:1 dr, 89% ee.; light yellow liquid,  $[\alpha]_D^{20} = -165.1$  ( $c = 0.64$ , in  $\text{CH}_2\text{Cl}_2$ ).

HPLC (Daicel chiralcel OX-3,  $\text{CO}_2/\text{MeOH}$  90/10, 1.5 mL/min,  $\lambda = 254$  nm),  $t_R(\text{major}) = 4.16$  min,  $t_R(\text{minor}) = 5.70$  min.

$^1\text{H NMR}$  (400 MHz,  $\text{Chloroform-}d$ )  $\delta = 8.01$  (d,  $J = 5.2$  Hz, 2H), 7.56 (t,  $J = 7.6$  Hz, 1H), 7.47 (t,  $J = 7.6$  Hz, 2H), 7.04 – 6.97 (m, 1H), 6.85 – 6.72 (m, 3H), 4.61 (s, 1H), 4.25 (d,  $J = 6.0$  Hz, 1H), 4.17 (m, 2H), 3.78 (s, 3H), 3.52 (s, 3H), 3.32 – 3.22 (m, 1H), 2.80 (dd,  $J = 6.0, 2.0$  Hz, 1H), 2.21 (dd,  $J = 9.2, 4.0$  Hz, 1H), 2.03 (d,  $J = 9.2$  Hz, 1H), 1.29 – 1.18 (m, 9H) ppm.

$^{13}\text{C NMR}$  (101 MHz,  $\text{CDCl}_3$ )  $\delta = 202.0, 174.5, 173.2, 157.7, 139.2, 138.3, 133.0, 132.1, 131.0, 129.1, 128.8, 128.6, 128.4, 113.4, 113.1, 61.0, 55.2, 53.1, 52.7, 51.2, 41.6, 39.4, 37.7, 35.5, 27.8, 23.7, 20.2, 14.2$  ppm.

ESI-HRMS calcd  $[\text{C}_{30}\text{H}_{32}\text{O}_6 + \text{Na}^+] = 511.2091$ , found 511.2092.

IR  $\tilde{\nu}$  (cm<sup>-1</sup>) 2957, 2837, 1718, 1675, 1611, 1445, 1373, 1268, 1225, 1185, 1030, 838, 719, 692, 536.

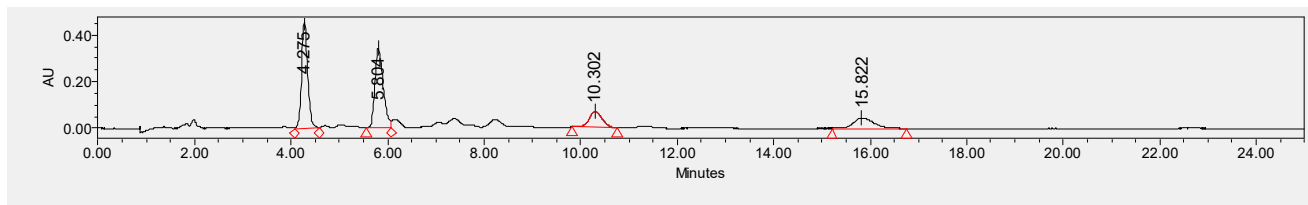

|   | Retention Time | Area    | % Area |
|---|----------------|---------|--------|
| 1 | 4.275          | 4100846 | 38.08  |
| 2 | 5.804          | 4089480 | 37.97  |
| 3 | 10.302         | 1277972 | 11.87  |
| 4 | 15.822         | 1300866 | 12.08  |

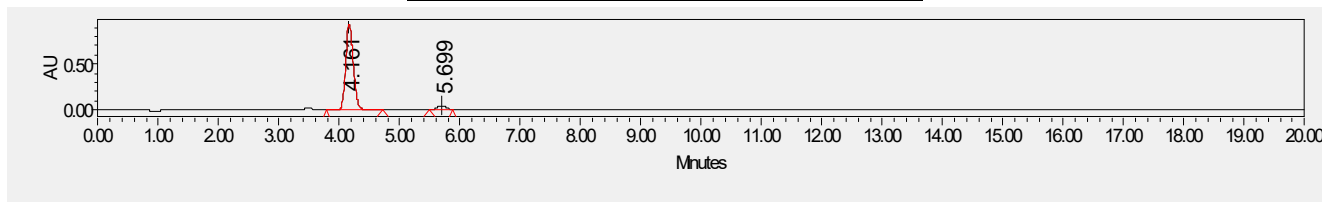

|   | Retention Time | Area    | % Area |
|---|----------------|---------|--------|
| 1 | 4.161          | 8192583 | 94.82  |
| 2 | 5.699          | 447490  | 5.18   |

**3ga: 6-ethyl 3-methyl -7-benzoyl-1,9-dimethyl-3-(4-(4,4,5,5-tetramethyl-1,3,2-dioxaboro -lan-2-yl) phenyl)tricyclo[3.2.2.0<sup>2,4</sup>]non-8-ene-3,6-dicarboxylate**

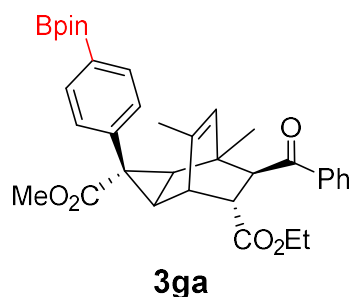

38.1 mg, 65% yield, 19:1 dr, 89% ee.; light yellow solid, 138 – 141 °C.,  $[\alpha]_D^{20} = -163.6$  ( $c = 0.33$ , in  $\text{CH}_2\text{Cl}_2$ ).

HPLC (Daicel chiralcel ODH,  $\text{CO}_2/\text{MeOH}$  90/10, 1.0 mL/min,  $\lambda = 254$  nm),  $t_R(\text{major}) = 10.81$ , min,  $t_R(\text{minor}) = 11.77$  min

$^1\text{H NMR}$  (400 MHz,  $\text{Chloroform-}d$ )  $\delta = 8.06 - 7.96$  (m, 2H), 7.61 (m, 3H), 7.47 (t,  $J = 7.6$  Hz, 2H), 7.08 (dd,  $J = 8.4, 1.2$  Hz, 1H), 6.94 (dd,  $J = 7.6, 1.2$  Hz, 1H), 4.57 (s, 1H), 4.26 (d,  $J = 6.0$  Hz, 1H), 4.17 (q,  $J = 7.2$  Hz, 2H), 3.60 (s, 1H), 3.50 (s, 3H), 3.31 – 3.24 (m, 1H), 2.80 (dd,  $J = 6.0, 2.0$  Hz, 1H), 2.23 (dd,  $J = 10.0, 4.0$  Hz, 1H), 2.08 (d,  $J = 7.2$  Hz, 1H), 1.34 (s, 12H), 1.26 – 1.21 (m, 9H) ppm.

$^{13}\text{C NMR}$  (101 MHz,  $\text{CDCl}_3$ )  $\delta = 202.0, 174.0, 173.2, 140.4, 139.2, 138.4, 134.5, 133.9, 133.5, 133.0, 132.0, 130.6, 129.7, 129.7, 128.7, 128.5, 83.7, 61.1, 53.0, 52.7, 51.2, 41.5, 39.3, 38.0, 36.2, 28.0, 25.0, 24.9, 23.8, 23.6, 21.3, 20.3, 14.2$  ppm.

ESI-HRMS calcd for  $[\text{C}_{35}\text{H}_{41}\text{BO}_7 + \text{Na}^+] = 607.2838$ , found 607.2839.

IR  $\tilde{\nu}$  ( $\text{cm}^{-1}$ ) 2977, 1721, 1678, 1518, 1446, 1397, 1359, 1319, 1229, 1061, 1020, 962, 898, 775, 720, 659.

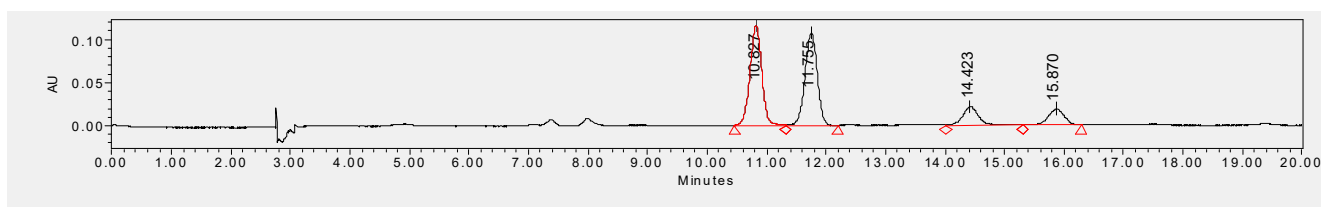

|   | Retention Time | Area    | % Area |
|---|----------------|---------|--------|
| 1 | 10.827         | 1595053 | 40.85  |
| 2 | 11.755         | 1543502 | 39.53  |
| 3 | 14.423         | 410404  | 10.51  |
| 4 | 15.870         | 355804  | 9.11   |

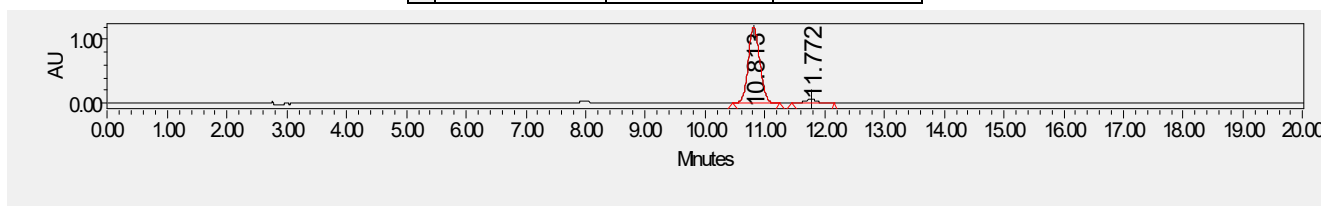

|   | Retention Time | Area     | % Area |
|---|----------------|----------|--------|
| 1 | 10.813         | 16234755 | 94.72  |
| 2 | 11.772         | 904909   | 5.28   |

**3ha: 6-ethyl 3-methyl -7-benzoyl-3-(2-chlorophenyl)-1,9-dimethyltricyclo[3.2.2.0<sup>2,4</sup>]non-8 -ene-3,6 -dicarboxylate**

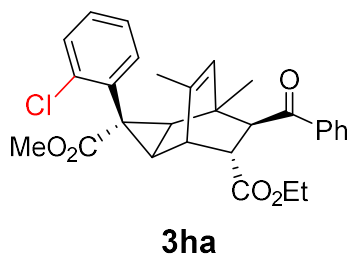

35.1 mg, 71% yield, 2:3 dr, 89/ 91% ee.; light yellow liquid,  $[\alpha]_D^{21} = -108.7$  ( $c = 0.24$ , in  $\text{CH}_2\text{Cl}_2$ ).

HPLC (Daicel chiralcel ODH,  $\text{CO}_2/\text{MeOH}$  90/10, 1.0 mL/min,  $\lambda = 254$  nm),  $t_1 = 10.71$ ,  $t_2 = 11.92$ ,  $t_3 = 13.31$ ,  $t_4 = 13.88$ .

$^1\text{H NMR}$  (400 MHz, Chloroform- $d$ )  $\delta = 8.07 - 7.96$  (m, 2H), 7.56 (t,  $J = 7.2$  Hz, 1H), 7.47 (t,  $J = 7.6$  Hz, 2H), 7.27 - 6.92 (m, 4H), 4.80 (m, 0.5H), 4.63 (m, 0.4 H) 4.32 - 4.09 (m, 3H), 3.54 (d,  $J = 7.6$  Hz, 3H), 3.42 - 3.36

(m, 0.4 H), 3.31 (s, 0.6 H), 2.79 (m, 1H), 2.47 (dd,  $J = 8.8$ , 4.0 Hz, 0.4 H), 2.29 (d,  $J = 9.2$  Hz, 0.6 H), 2.23 (dd,  $J = 8.8$ , 3.2 Hz, 0.6 H), 2.09 (d,  $J = 9.2$  Hz, 0.4 H), 1.35 - 1.18 (m, 9H) ppm.

$^{13}\text{C NMR}$  (101 MHz,  $\text{CDCl}_3$ )  $\delta = 202.3$ , 202.1, 173.4, 173.2, 173.1, 140.1, 139.2, 139.2, 138.2, 135.8, 135.7, 135.2, 134.7, 133.8, 133.0, 133.0, 132.7, 129.8, 129.5, 129.1, 128.7, 128.6, 128.5, 127.5, 127.4, 127.4, 126.2, 125.8, 61.1, 53.3, 52.8, 52.6, 51.4, 51.3, 41.8, 41.6, 40.4, 39.9, 39.8, 38.4, 34.5, 34.3, 30.5, 28.1, 23.8, 23.0, 20.1, 19.6, 14.2, 14.2 ppm.

ESI-HRMS calcd  $[\text{C}_{29}\text{H}_{29}\text{ClO}_5 + \text{Na}^+] = 515.1595$ , 517.1566, found 515.1590, 517.1560.

IR  $\tilde{\nu}$  ( $\text{cm}^{-1}$ ) 2959, 1721, 1676, 1476, 1441, 1373, 1268, 1228, 1191, 1069, 1071, 691, 657.

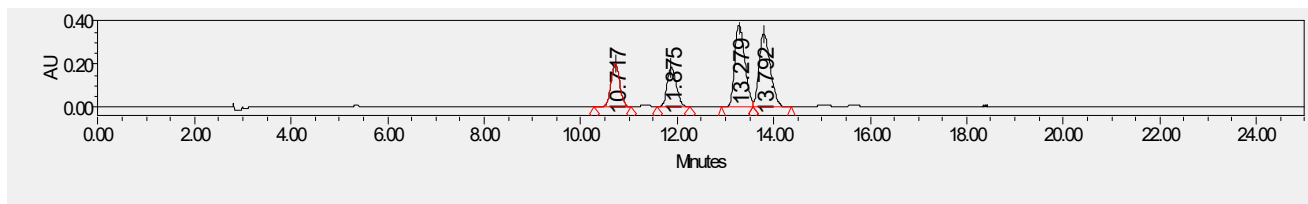

|   | Retention Time | Area    | % Area |
|---|----------------|---------|--------|
| 1 | 10.717         | 2551842 | 15.70  |
| 2 | 11.875         | 2523436 | 15.53  |
| 3 | 13.279         | 5626588 | 34.63  |
| 4 | 13.792         | 5546987 | 34.14  |

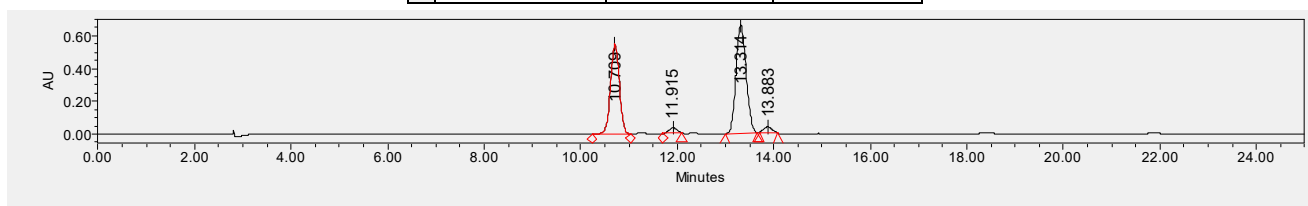

|   | Retention Time | Area    | % Area |
|---|----------------|---------|--------|
| 1 | 10.709         | 6899647 | 39.66  |
| 2 | 11.915         | 379216  | 2.18   |
| 3 | 13.314         | 9671287 | 55.60  |
| 4 | 13.883         | 445391  | 2.56   |

**3ia: 6-ethyl 3-methyl -7-benzoyl-3-(2-methoxyphenyl)-1,9-dimethyltricyclo[3.2.2.0<sup>2,4</sup>]non-8-ene-3,6-dicarboxylate**

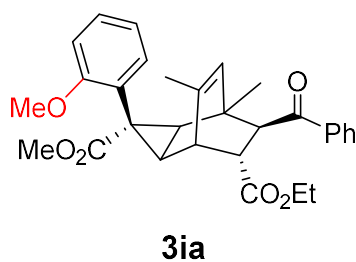

44.0 mg, 89% yield, 1:1 dr, 80 /80 % ee.; light yellow liquid,  $[\alpha]_D^{20} = -114.2$  ( $c = 0.74$ , in  $\text{CH}_2\text{Cl}_2$ ).

HPLC (Daicel chiralcel OXH,  $\text{CO}_2/\text{MeOH}$  95/5, 0.8 mL/min,  $\lambda = 254$  nm),  $t_1 = 30.10$ ,  $t_2 = 36.65$ ,  $t_3 = 39.78$ ,  $t_4 = 41.98$ .

$^1\text{H NMR}$  (400 MHz,  $\text{Chloroform-}d$ )  $\delta = 8.08 - 7.98$  (m, 2H), 7.60 – 7.52 (m, 1H), 7.46 (t,  $J = 8.0$  Hz, 2H), 7.17 – 7.10 (m, 1H), 7.03 – 6.68 (m, 3H), 4.61 (s, 1H), 4.28 – 4.10 (m, 3H), 3.79 (m, 1.4 H), 3.71 (m, 1.5 H), 3.51 (d,

$J = 5.2$  Hz, 3H), 3.24 (m, 1H), 2.81 (dd,  $J = 6.0, 2.0$  Hz, 1H), 2.75 (dd,  $J = 6.0, 2.0$  Hz, 0.4 H), 2.34 (dd,  $J = 8.8, 4.0$  Hz, 0.5H), 2.20 (dd,  $J = 8.8, 4.0$  Hz, 0.5H), 2.09 (d,  $J = 9.2$  Hz, 0.5H), 2.01 (d,  $J = 9.2$  Hz, 0.5H), 1.29 – 1.16 (m, 9H) ppm.

$^{13}\text{C NMR}$  (101 MHz,  $\text{CDCl}_3$ )  $\delta = 202.4, 202.3, 174.4, 174.3, 173.3, 157.6, 157.1, 139.9, 139.4, 139.3, 137.2, 132.9, 132.9, 132.8, 131.7, 129.7, 128.6, 128.6, 128.5, 127.6, 127.2, 127.0, 126.0, 125.4, 120.1, 119.6, 110.2, 109.4, 61.0, 55.1, 54.5, 53.4, 52.9, 52.6, 51.4, 51.2, 41.9, 41.6, 40.0, 39.7, 39.5, 37.4, 31.4, 31.3, 29.3, 27.2, 23.8, 22.6, 19.8, 19.6, 14.2$  ppm.

ESI-HRMS calcd  $[\text{C}_{30}\text{H}_{32}\text{O}_6 + \text{Na}^+] = 511.2091$ , found 511.2094.

IR  $\tilde{\nu}$  ( $\text{cm}^{-1}$ ) 2957, 2873, 1719, 1676, 1496, 1447, 1372, 1227, 1189, 1028, 963, 755, 719, 692, 516.

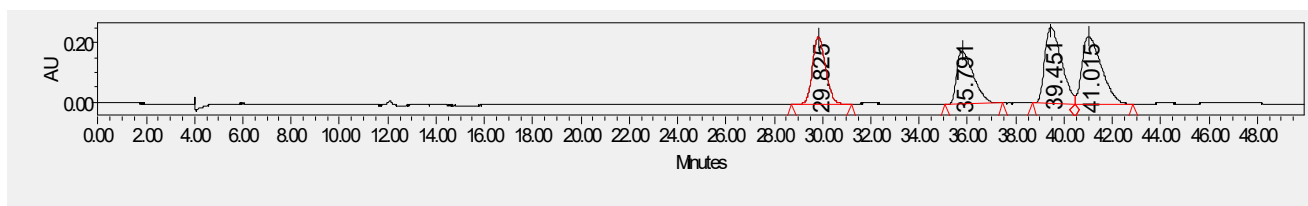

|   | Retention Time | Area     | % Area |
|---|----------------|----------|--------|
| 1 | 29.825         | 8427667  | 20.15  |
| 2 | 35.791         | 8458284  | 20.22  |
| 3 | 39.451         | 12300516 | 29.40  |
| 4 | 41.015         | 12644984 | 30.23  |

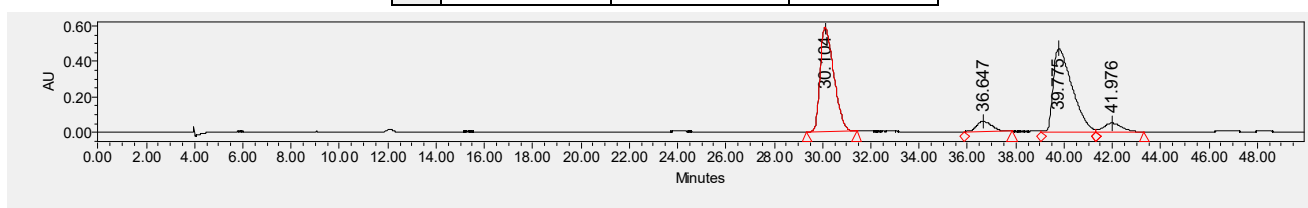

|   | Retention Time | Area     | % Area |
|---|----------------|----------|--------|
| 1 | 30.104         | 23220900 | 43.01  |
| 2 | 36.647         | 2563569  | 4.75   |
| 3 | 39.775         | 25603196 | 47.42  |
| 4 | 41.976         | 2603856  | 4.82   |



**3ja: diethyl -7-benzoyl-1,9-dimethyl-3-phenyltricyclo[3.2.2.0<sup>2,4</sup>]non-8-ene-3,6-dicarboxylate**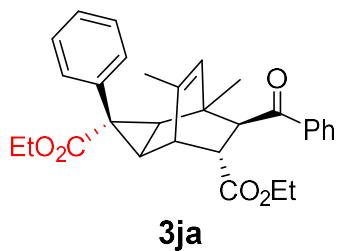

42.5 mg, 90% yield, 19:1 dr, 85 % ee; light yellow liquid,  $[\alpha]_D^{20} = -115.6$  ( $c = 0.69$ , in  $\text{CH}_2\text{Cl}_2$ ).

HPLC (Daicel chiralcel OX-3,  $\text{CO}_2/\text{MeOH}$  90/10, 1.5 mL/min,  $\lambda = 254$  nm),  $t_R(\text{major}) = 2.55$  min,  $t_R(\text{minor}) = 3.72$  min.

$^1\text{H NMR}$  (400 MHz, Chloroform- $d$ )  $\delta = 8.01$  (d,  $J = 7.6$  Hz, 2H), 7.56 (t,  $J = 7.2$  Hz, 1H), 7.47 (t,  $J = 7.6$  Hz, 2H), 7.14 (m, 4H), 6.92 (d,  $J = 7.2$  Hz, 1H), 4.58 (s, 1H), 4.27 (d,  $J = 6.0$  Hz, 1H), 4.17 (q,  $J = 7.2$  Hz, 2H), 3.98 (m, 2H), 3.33 – 3.24 (m, 1H), 2.81 (dd,  $J = 6.0, 2.0$  Hz, 1H), 2.22 (dd,  $J = 8.8, 3.6$  Hz, 1H), 2.05 (d,  $J = 9.0$  Hz, 1H), 1.29 – 1.20 (m, 9H), 1.06 (t,  $J = 6.0$  Hz, 3H) ppm.

$^{13}\text{C NMR}$  (101 MHz,  $\text{CDCl}_3$ )  $\delta = 202.0, 173.7, 173.2, 139.2, 138.3, 137.2, 133.0, 131.2, 130.2, 129.4, 128.6, 128.5, 127.9, 127.4, 125.8, 61.3, 61.0, 53.1, 51.2, 41.5, 39.4, 37.4, 36.4, 27.5, 23.7, 20.1, 14.2, 14.0$  ppm.

ESI-HRMS calcd  $[\text{C}_{30}\text{H}_{32}\text{O}_5 + \text{Na}^+] = 495.2142$ , found 495.2142.

IR  $\tilde{\nu}$  ( $\text{cm}^{-1}$ ) 2963, 1719, 1677, 1446, 1369, 1223, 1191, 1059, 1027, 939, 719, 525.

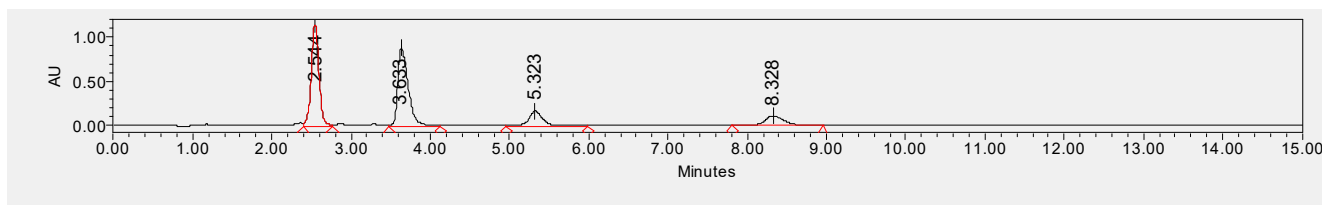

|   | Retention Time | Area    | % Area |
|---|----------------|---------|--------|
| 1 | 2.544          | 8029132 | 39.06  |
| 2 | 3.633          | 8292118 | 40.34  |
| 3 | 5.323          | 2372295 | 11.54  |
| 4 | 8.328          | 1861473 | 9.06   |

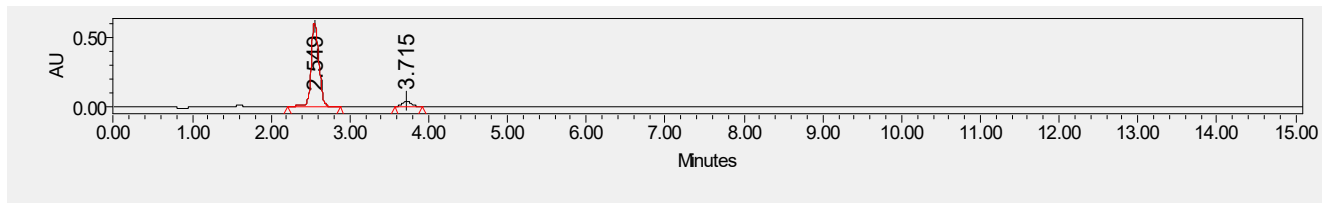

|   | Retention Time | Area    | % Area |
|---|----------------|---------|--------|
| 1 | 2.549          | 4130763 | 92.71  |
| 2 | 3.715          | 324946  | 7.29   |

**3ka: 6-ethyl 3-isopropyl -7-benzoyl-1,9-dimethyl-3-phenyltricyclo[3.2.2.0<sup>2,4</sup>]non-8-ene-3,6-dicarboxylate**

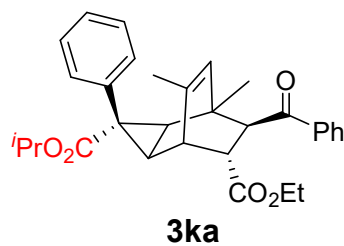

42.3mg, 89% yield, 19:1 dr, 90% ee.; light yellow liquid,  $[\alpha]_D^{21} = -130.6$  ( $c = 0.53$ , in  $\text{CH}_2\text{Cl}_2$ ).

HPLC (Daicel chiralcel OX-3,  $\text{CO}_2/\text{MeOH}$  90/10, 1.5 mL/min,  $\lambda = 254$  nm),  $t_R(\text{major}) = 2.12$  min,  $t_R(\text{minor}) = 3.09$  min.

$^1\text{H NMR}$  (400 MHz,  $\text{Chloroform-}d$ )  $\delta = 8.05 - 7.99$  (m, 2H), 7.56 (t,  $J = 7.2$  Hz, 1H), 7.47 (m, 2H), 7.21 - 7.04 (m, 4H), 6.90 (d,  $J = 9.2$  Hz, 1H), 4.82 (m, 1H), 4.58 (s, 1H), 4.27 (d,  $J = 5.6$  Hz, 1H), 4.18 (q,  $J = 7.2$  Hz, 2H), 3.26 (m, 1H), 2.81 (dd,  $J = 6.0, 2.2$  Hz, 1H), 2.19 (dd,  $J = 9.2, 4.0$  Hz, 1H), 2.02 (d,  $J = 8.8$  Hz, 1H), 1.29 - 1.21 (m, 9H), 1.04 (m, 6H) ppm.

$^{13}\text{C NMR}$  (101 MHz,  $\text{CDCl}_3$ )  $\delta = 202.1, 173.3, 173.1, 139.3, 138.3, 137.3, 132.9, 131.1, 130.2, 129.4, 128.6, 128.5, 127.8, 127.3, 125.7, 68.5, 61.0, 53.1, 51.2, 41.5, 39.4, 37.0, 36.6, 27.1, 23.7, 21.5, 21.5, 20.1, 14.2$  ppm.

ESI-HRMS calcd  $[\text{C}_{31}\text{H}_{34}\text{O}_5 + \text{Na}^+] = 509.2299$ , found 509.2295.

IR  $\tilde{\nu}$  ( $\text{cm}^{-1}$ ) 2977, 2873, 1721, 1677, 1447, 1373, 1229, 1187, 1107, 807, 780, 719, 695.

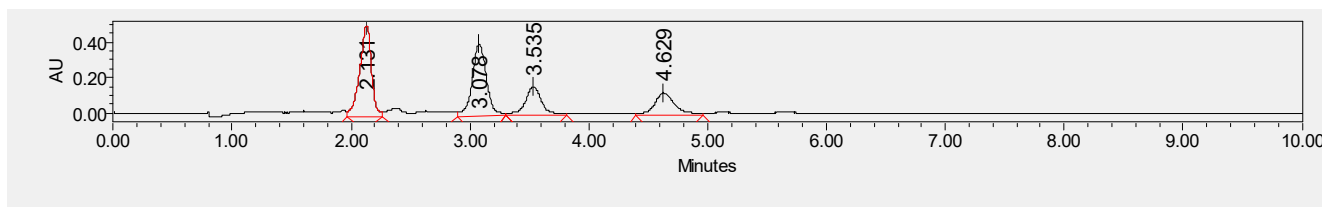

|   | Retention Time | Area    | % Area |
|---|----------------|---------|--------|
| 1 | 2.131          | 3531479 | 34.57  |
| 2 | 3.078          | 3394585 | 33.23  |
| 3 | 3.535          | 1702301 | 16.66  |
| 4 | 4.629          | 1586659 | 15.53  |

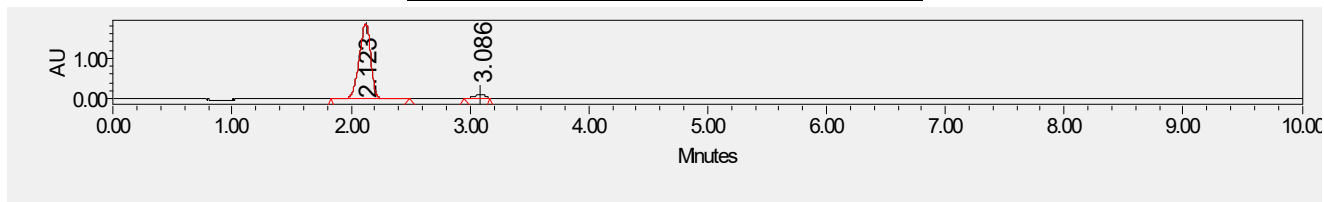

|   | Retention Time | Area     | % Area |
|---|----------------|----------|--------|
| 1 | 2.123          | 12399457 | 95.35  |
| 2 | 3.086          | 604065   | 4.65   |

**3la: 3-benzyl 6-ethyl-7-benzoyl-1,9-dimethyl-3-phenyltricyclo[3.2.2.0<sup>2,4</sup>]non-8-ene-3,6-dicarboxylate**

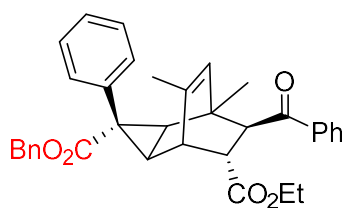

**3la**

36.6 mg, 68% yield, 19:1 dr, 88 % ee; light yellow liquid,  $[\alpha]_D^{22} = -105.3$  ( $c = 0.66$ , in  $\text{CH}_2\text{Cl}_2$ ).

HPLC (Daicel chiralcel OX-3,  $\text{CO}_2/\text{MeOH}$  90/10, 1.5 mL/min,  $\lambda = 254$  nm),  $t_R(\text{major}) = 5.24$  min,  $t_R(\text{minor}) = 7.93$  min

$^1\text{H NMR}$  (600 MHz,  $\text{Chloroform-}d$ )  $\delta = 8.02$  (d,  $J = 7.6$  Hz, 2H), 7.57 (t,  $J = 5.2$  Hz, 1H), 7.48 (m, 2H), 7.22 (m, 5H), 7.14 (m, 2H), 7.04 – 6.91 (m, 3H), 5.00 (s, 2H), 4.61 (s, 1H), 4.28 (d,  $J = 6.0$  Hz, 1H), 4.17 (q,  $J = 7.2$  Hz, 2H), 3.34 – 3.26 (m, 1H), 2.82 (dd,  $J = 4.0, 1.6$  Hz, 1H), 2.27 (dd,  $J = 6.4, 3.6$  Hz, 1H), 2.10 (d,  $J = 6.0$  Hz, 1H), 1.30 – 1.20 (m, 9H) ppm.

$^{13}\text{C NMR}$  (151 MHz,  $\text{CDCl}_3$ )  $\delta = 202.0, 173.4, 173.1, 139.2, 138.3, 137.0, 136.1, 133.0, 131.2, 130.2, 129.5, 128.6, 128.5, 128.3, 128.0, 127.6, 127.5, 126.7, 125.9, 66.4, 61.0, 53.0, 51.2, 41.5, 39.3, 37.8, 36.3, 27.8, 23.7, 20.1, 14.2$  ppm.

ESI-HRMS calcd  $[\text{C}_{35}\text{H}_{34}\text{O}_5^+\text{Na}^+] = 557.2298$ , found 557.2300.

IR  $\tilde{\nu}$  ( $\text{cm}^{-1}$ ) 3029, 2837, 1722, 1677, 1598, 1447, 1373, 1220, 1099, 1025, 808, 721, 696, 508.

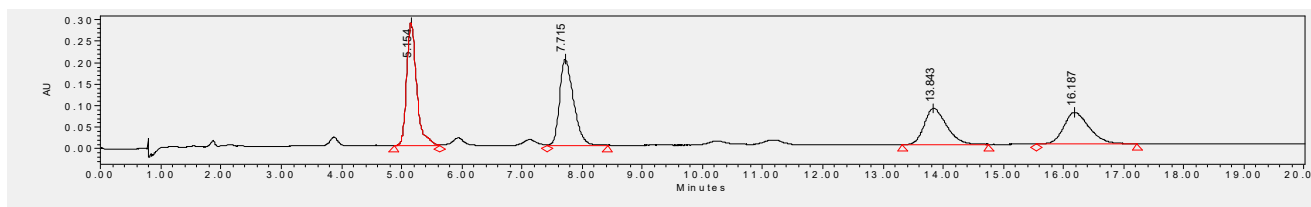

|   | Retention Time | Area    | % Area |
|---|----------------|---------|--------|
| 1 | 5.154          | 3313609 | 30.58  |
| 2 | 7.715          | 3187767 | 29.42  |
| 3 | 13.843         | 2159216 | 19.93  |
| 4 | 16.187         | 2176042 | 20.08  |

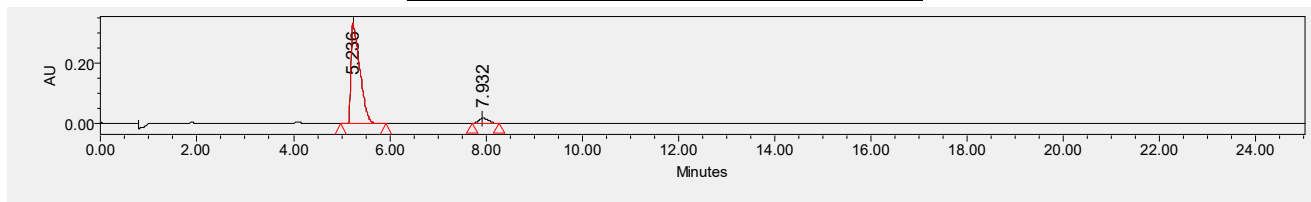

|   | Retention Time | Area    | % Area |
|---|----------------|---------|--------|
| 1 | 5.236          | 4243279 | 94.09  |
| 2 | 7.932          | 266760  | 5.91   |

**3ma: 6-ethyl 3-methyl -7-benzoyl-3-(4-fluorophenyl)-1,9-dimethyltricyclo[3.2.2.0<sup>2,4</sup>]non-8-ene-3,6-dicarboxylate**

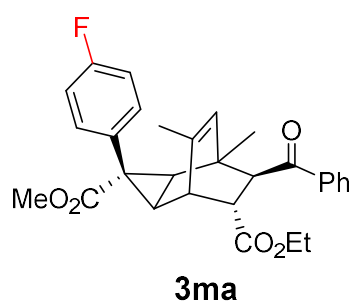

37.2 mg, 78% yield; light yellow liquid,  $[\alpha]_D^{22} = -105.3$  ( $c = 0.66$ , in  $\text{CH}_2\text{Cl}_2$ ). The racemates of this compound cannot be separated by the generally used column.

$^1\text{H NMR}$  (400 MHz,  $\text{Chloroform-}d$ )  $\delta = 8.07 - 7.96$  (m, 2H), 7.56 (d,  $J = 7.2$  Hz, 1H), 7.47 (t,  $J = 7.6$  Hz, 2H), 7.10 - 7.00 (m, 1H), 6.94 - 6.83 (m, 3H), 4.60 (s, 1H), 4.25 (d,  $J = 6.0$  Hz, 1H), 4.17 (m, 2H), 3.53 (s, 3H), 3.30 - 3.21 (m, 1H), 2.80 (dd,  $J = 6.0, 2.0$  Hz, 1H), 2.24 (dd,  $J = 6.0, 2.0$  Hz, 1H), 2.07 (d,  $J = 7.2$  Hz, 1H), 1.31 - 1.19 (m, 9H) ppm.

$^{13}\text{C NMR}$  (101 MHz,  $\text{CDCl}_3$ )  $\delta = 201.9, 174.1, 173.1, 162.4, 160.0, 139.12, 138.3, 133.0$  ( $J_{\text{C-F}} = 4.04$  Hz), 132.5 ( $J_{\text{C-F}} = 8.1$  Hz), 131.4 ( $J_{\text{C-F}} = 6.1$  Hz), 129.3, 128.7, 128.5, 114.8, 114.6, 61.1, 53.1, 52.8, 51.2, 41.5, 39.3, 37.8, 35.4, 27.9, 23.7, 20.2, 14.2 ppm.

$^{19}\text{F NMR}$  (376 MHz,  $\text{CDCl}_3$ )  $\delta -116.75$  ppm.

ESI-HRMS calcd [ $\text{C}_{29}\text{H}_{29}\text{FO}_5 + \text{Na}^+$ ] = 477.2072, found 477.2070.

**3na: 6-ethyl 3-methyl -7-benzoyl-3-(3-fluorophenyl)-1,9-dimethyltricyclo[3.2.2.0<sup>2,4</sup>]non-8-ene-3,6-dicarboxylate**

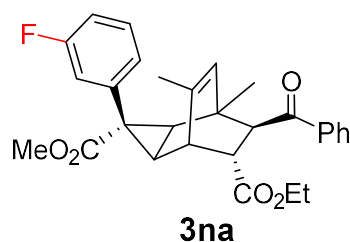

42.9 mg, 90 % yield, light yellow liquid, the racemates of this compound cannot be separated by the generally used column.

$^1\text{H NMR}$  (600 MHz,  $\text{Chloroform-}d$ )  $\delta = 8.00$  (d,  $J = 7.6$  Hz, 2H), 7.61 - 7.54 (m, 1H), 7.47 (t,  $J = 7.2$  Hz, 2H), 7.16 (m, 1H), 6.89 - 6.60 (m, 3H), 4.66 (s, 0.5H), 4.59 (s, 0.5H), 4.31 - 4.11 (m, 3H), 3.54 (d,  $J = 4.8$  Hz, 3H), 3.32 - 3.21 (m, 1H), 2.81 (d,  $J = 6.0$  Hz, 1H), 2.26 (dd,  $J = 9.6, 3.6$  Hz,

0.5H), 2.22 (dd,  $J = 9.0, 4.2$  Hz, 0.5H), 2.10 (d,  $J = 6.0$  Hz, 0.5H), 2.07 (d,  $J = 6.0$  Hz, 0.5H), 1.34 - 1.21 (m, 9H) ppm.

$^{13}\text{C NMR}$  (151 MHz,  $\text{CDCl}_3$ )  $\delta = 201.8, 201.8, 173.4$ , ( $J_{\text{C-F}} = 4.5$  Hz), 173.3, 162.3, 162.3, 139.8 ( $J_{\text{C-F}} = 5.1$  Hz), 139.7 ( $J_{\text{C-F}} = 9.1$  Hz), 139.2 ( $J_{\text{C-F}} = 3.1$  Hz), 138.4, 138.0, 133.0, 129.7, 129.6, 129.2, 129.2, 128.7, 128.5, 126.8 ( $J_{\text{C-F}} = 2.3$  Hz), 126.0 ( $J_{\text{C-F}} = 2.3$  Hz), 117.6 ( $J_{\text{C-F}} = 19.6$  Hz), 117.5 ( $J_{\text{C-F}} = 21.1$  Hz), 113.2 ( $J_{\text{C-F}} = 21.1$  Hz), 112.9 ( $J_{\text{C-F}} = 21.2$  Hz), 61.1, 53.1, 53.0, 52.8, 51.2, 41.5, 41.4, 39.3, 38.0, 28.0, 23.6, 20.2, 20.0, 14.2 ppm.

$^{19}\text{F NMR}$  (565 MHz,  $\text{CDCl}_3$ )  $\delta = -114.36, -114.59$  ppm.

**3oa: 6-ethyl 3-methyl -7-benzoyl-3-(3-chlorophenyl)-1,9-dimethyltricyclo[3.2.2.0<sup>2,4</sup>]non-8-ene-3,6-dicarboxylate**

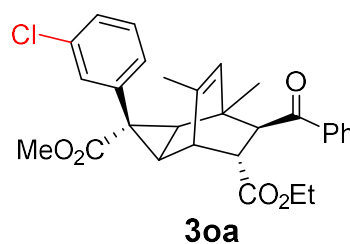

44.3 mg, 90 % yield, yellow liquid, the racemates of this compound cannot be separated by the generally used column.

$^1\text{H NMR}$  (400 MHz,  $\text{Chloroform-}d$ )  $\delta = 8.00$  (d,  $J = 8.0$  Hz, 2H), 7.57 (t,  $J = 7.2$  Hz, 1H), 7.47 (m, 2H), 7.18 - 7.08 (m, 2H), 7.04 - 6.82 (m, 2H), 4.66 (s, 0H), 4.56 (s, 1H), 4.26 (d,  $J = 5.8$  Hz, 1H), 4.22 - 4.11 (m, 2H), 3.54 (d,  $J = 2.0$  Hz, 3H), 3.32 - 3.22 (m, 1H), 2.85 - 2.78 (m, 1H), 2.28 -

2.19 (m, 1H), 2.08 (dd,  $J = 2.8, 3.6$  Hz, 1H), 1.33 - 1.20 (m, 9H) ppm.

$^{13}\text{C}$  NMR (101 MHz,  $\text{CDCl}_3$ )  $\delta$  = 202.3, 202.1, 173.4, 173.2, 173.1, 140.1, 139.2, 139.2, 138.2, 135.8, 135.7, 135.2, 134.7, 133.8, 133.0, 133.0, 132.7, 129.8, 129.5, 129.1, 128.7, 128.6, 128.5, 127.5, 127.4, 127.4, 126.2, 125.8, 61.1, 53.3, 52.8, 52.6, 51.4, 51.32, 41.8, 41.6, 40.4, 39.9, 39.8, 38.4, 34.5, 34.3, 30.5, 28.1, 23.8, 23.0, 20.1, 19.6, 14.2, 14.2 ppm.

**3pa: 6-ethyl 3-methyl -7-benzoyl-3-(3-bromophenyl)-1,9-dimethyltricyclo[3.2.2.0<sup>2,4</sup>]non-8-ene-3,6-dicarboxylate**

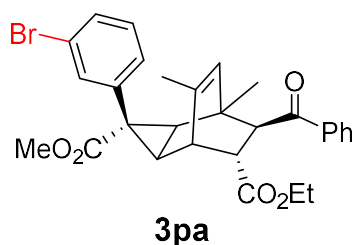

48.2 mg, 90 % yield, yellow solid, the racemates of this compound cannot be separated by the generally used column.

$^1\text{H}$  NMR (400 MHz, Chloroform-*d*)  $\delta$  = 8.00 (d,  $J$  = 7.4 Hz, 2H), 7.56 (t,  $J$  = 7.2 Hz, 1H), 7.47 (t,  $J$  = 7.2 Hz, 2H), 7.29 – 7.16 (m, 2H), 7.11 – 7.03 (m, 1H), 6.94 (m, 1H), 4.66 (m, 0.4H), 4.56 (m, 0.6H), 4.25 (d,  $J$  = 5.8 Hz, 1H), 4.17 (m, 2H), 3.53 (s, 3H), 3.34 – 3.23 (m, 1H), 2.88 – 2.74 (m, 1H),

2.23 (m, 1H), 2.08 (d,  $J$  = 7.2 Hz, 1H), 1.34 – 1.17 (m, 9H) ppm.

$^{13}\text{C}$  NMR (101 MHz,  $\text{CDCl}_3$ )  $\delta$  = 201.8, 201.7, 173.6, 173.5, 173.0, 139.6, 139.6, 139.2, 139.1, 138.1, 138.2, 134.0, 133.2, 133.0, 129.8, 129.6, 129.5, 129.4, 129.1, 129.0, 128.8, 128.7, 128.4, 128.4, 122.1, 121.4, 61.1, 53.0, 52.8, 51.1, 41.5, 41.4, 39.2, 39.2, 37.9, 37.9, 35.7, 35.6, 28.1, 28.0, 23.7, 23.6, 20.2, 19.9, 14.2 ppm.

**3ra: Regio-isomer mixture 6-ethyl 3-methyl-7-benzoyl-1-ethyl-9-methyl-3-phenyltricyclo[3.2.2.0<sup>2,4</sup>]non-8-ene-3,6-dicarboxylate and 6-ethyl 3-methyl -7-benzoyl-9-ethyl-1-methyl-3-phenyltricyclo[3.2.2.0<sup>2,4</sup>]non-8-ene-3,6-dicarboxylate**

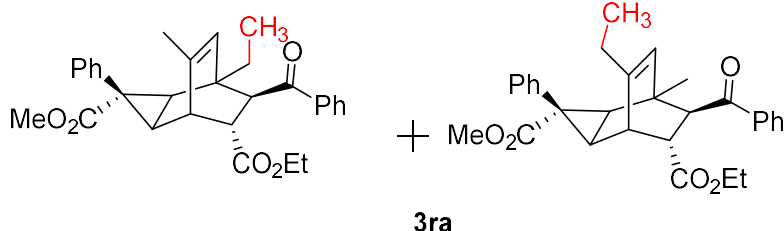

10.4 mg, total recovery: 22%, the mixture cannot be separated due to the same Rf value. 19:1dr / 19:1 dr, 88% ee / 86% ee; light yellow liquid.

HPLC (Daicel chiralcel OXH,  $\text{CO}_2/\text{MeOH}$  95/5, 1.0 mL/min,  $\lambda$  = 254 nm),  $t_1$  = 20.37,  $t_2$  = 22.03,  $t_3$  = 36.33,  $t_4$

= 47.56.

$^1\text{H}$  NMR (400 MHz, Chloroform-*d*)  $\delta$  = 8.01 (d,  $J$  = 7.6 Hz, 2H), 7.55 (dd,  $J$  = 7.0, 4.9 Hz, 1H), 7.46 (m, 2H), 7.23 – 6.92 (m, 5H), 4.79 (s, 0.5 H), 4.53 (s, 0.5 H), 4.28 (m, 1H), 4.18 (m, 2H), 3.52 (d,  $J$  = 2.8 Hz, 3H), 3.32 – 3.21 (m, 1H), 2.79 (dd,  $J$  = 6.0, 2.0 Hz, 0.5 H), 2.69 (dd,  $J$  = 6.0, 2.0 Hz, 0.5 H), 2.24 (m, 1H), 2.07 (t,  $J$  = 8.8 Hz, 1H), 1.60 (m, 2H), 1.30 – 1.20 (m, 6H), 1.00 (t,  $J$  = 7.6 Hz, 1.5 H), 0.44 (t,  $J$  = 7.6 Hz, 1.5 H) ppm.

$^{13}\text{C}$  NMR (101 MHz,  $\text{CDCl}_3$ )  $\delta$  = 202.7, 201.9, 174.3, 173.2, 173.2, 143.0, 139.3, 139.1, 138.68, 137.0, 132.9, 131.2, 131.1, 130.5, 129.9, 128.6, 128.6, 128.5, 128.4, 128.2, 128.0, 127.9, 127.4, 126.8, 126.0, 125.9, 61.0, 53.2, 52.7, 52.2, 51.8, 51.6, 46.2, 41.4, 39.9, 39.0, 37.9, 36.2, 35.9, 35.3, 28.9, 27.6, 27.0, 26.4, 23.9, 20.0, 14.2, 10.6, 9.8.

ESI-HRMS calcd [ $\text{C}_{30}\text{H}_{32}\text{O}_5^+\text{Na}^+$ ] = 495.2142, found 495.2143.

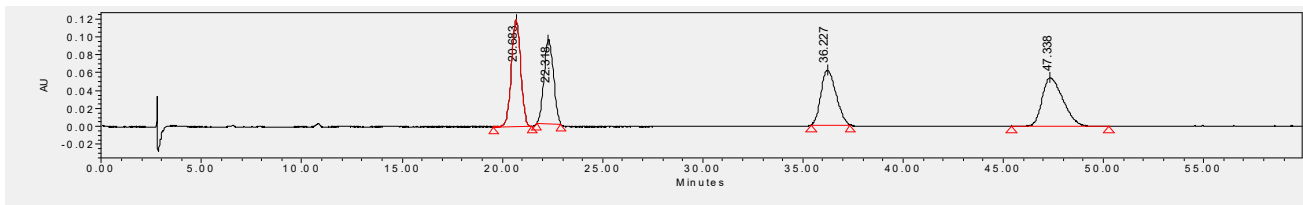

|   | Retention Time | Area    | % Area |
|---|----------------|---------|--------|
| 1 | 20.683         | 3851454 | 27.49  |
| 2 | 22.318         | 3115623 | 22.24  |
| 3 | 36.227         | 3183888 | 22.72  |
| 4 | 47.338         | 3859561 | 27.55  |

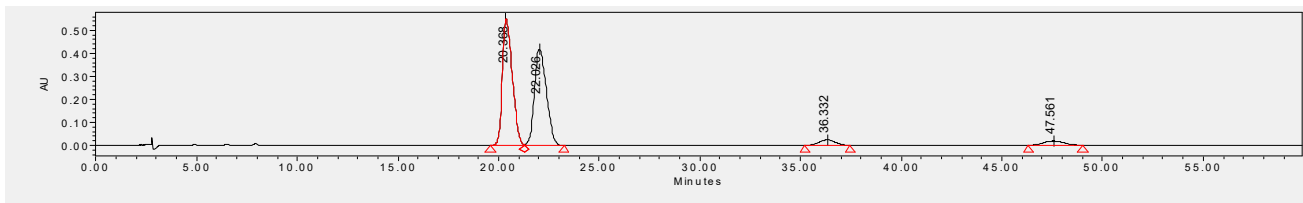

|   | Retention Time | Area     | % Area |
|---|----------------|----------|--------|
| 1 | 20.368         | 18880767 | 48.62  |
| 2 | 22.026         | 17300165 | 44.55  |
| 3 | 36.332         | 1357737  | 3.50   |
| 4 | 47.561         | 1298149  | 3.34   |

**5aa: methyl -8-benzoyl-1,6-dimethyl-3-phenyltricyclo[3.2.2.0<sup>2,4</sup>]nona-6,8-diene-3-carboxylate**

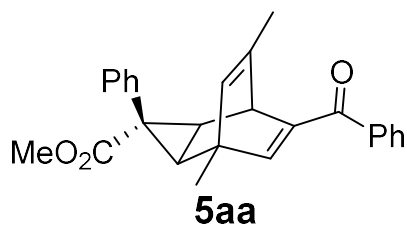

32.6 mg, 84% yield, 19:1 dr, 80% ee; yellow solid, solid, m. p. 173–174 °C,  $[\alpha]_D^{22} = 23.3$  ( $c = 0.56$ , in  $\text{CH}_2\text{Cl}_2$ ).

HPLC (Daicel chiralcel ID-3,  $\text{CO}_2/\text{EtOH}$  95/10, 1.5 mL/min,  $\lambda = 254$  nm),  $t_R(\text{major}) = 7.10$  min,  $t_R(\text{minor}) = 9.46$  min.

$^1\text{H NMR}$  (400 MHz, Chloroform- $d$ )  $\delta = 7.68 - 7.62$  (m, 2H), 7.52 (m, 1H), 7.42 (m, 2H), 7.27 – 7.21 (m, 2H), 7.17 (m, 2H), 7.06 – 7.01 (m, 2H), 4.84 (s, 1H), 4.35 (m, 1H), 3.51 (s, 3H), 2.51 (dd,  $J = 9.2, 4.0$  Hz, 1H), 2.14 (d,  $J = 9.6$  Hz, 1H), 1.74 (s, 3H), 1.21 (d,  $J = 1.6$ Hz, 3H) ppm.

$^{13}\text{C NMR}$  (101 MHz,  $\text{CDCl}_3$ )  $\delta = 192.5, 173.1, 161.6, 153.5, 143.4, 138.2, 136.8, 134.3, 131.9, 131.1, 130.4, 129.1, 128.2, 128.0, 127.2, 126.1, 52.7, 50.6, 46.5, 44.2, 42.7, 39.2, 22.3, 20.1$  ppm.

ESI-HRMS calcd  $[\text{C}_{26}\text{H}_{24}\text{O}_3 + \text{Na}^+] = 407.1618$ , found 407.1615.

IR  $\tilde{\nu}$  ( $\text{cm}^{-1}$ ) 3025, 2959, 2871, 1713, 1636, 1597, 1487, 1434, 1325, 1235, 1153, 1057, 1023, 755, 746.

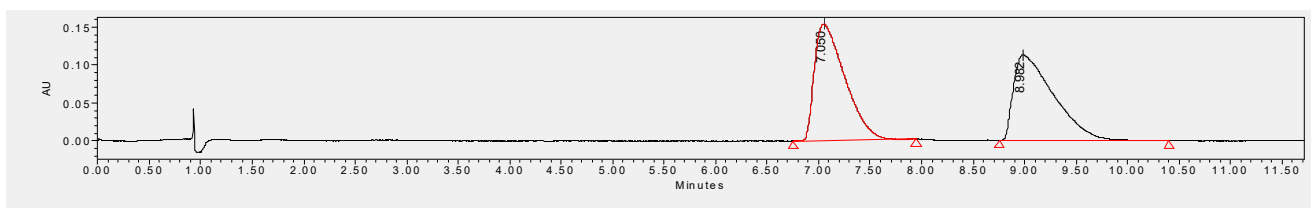

|   | Retention Time | Area    | % Area |
|---|----------------|---------|--------|
| 1 | 7.050          | 3161020 | 50.62  |
| 2 | 8.982          | 3083202 | 49.38  |

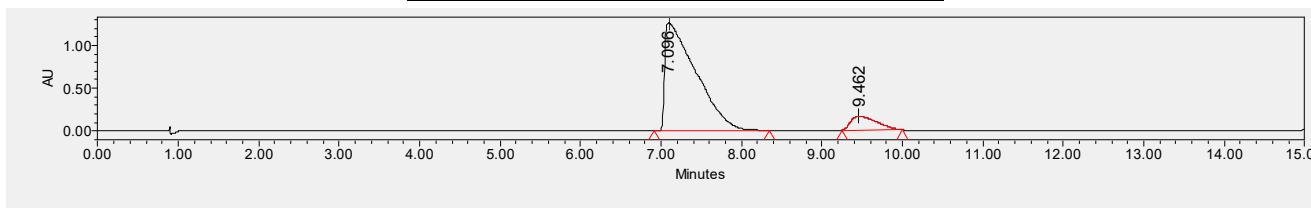

|   | Retention Time | Area     | % Area |
|---|----------------|----------|--------|
| 1 | 7.096          | 33890459 | 90.43  |
| 2 | 9.462          | 3587951  | 9.57   |

**5ab:** methyl-8-(4-fluorobenzoyl)-1,6-dimethyl-3-phenyltricyclo[3.2.2.0<sup>2,4</sup>]nona-6,8-diene-3-carboxylate

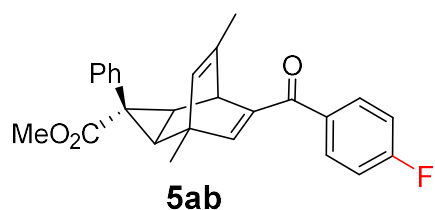

26.7 mg, 66% yield, 19:1dr, 60% ee.; yellow solid, m. p. 170 – 172 °C,  $[\alpha]_D^{21} = 3.2$  ( $c = 0.54$ , in  $\text{CH}_2\text{Cl}_2$ ).

HPLC (Daicel chiralcel IE-3,  $\text{CO}_2/\text{MeOH}$  90/10, 1.5 mL/min,  $\lambda = 254$  nm),  $t_R(\text{major}) = 4.88$  min,  $t_R(\text{minor}) = 5.74$  min.

$^1\text{H NMR}$  (400 MHz,  $\text{Chloroform-}d$ )  $\delta$  7.77 – 7.61 (m, 2H), 7.24 (m, 2H), 7.21 – 7.14 (m, 2H), 7.09 (m, 2H), 7.03 (d,  $J = 7.4$  Hz, 2H), 2.14 (d,  $J = 9.6$  Hz, 1H),

4.84 (s, 1H), 4.39 – 4.23 (m, 1H), 3.50 (s, 3H), 2.50 (dd,  $J = 8.8, 4.2$  Hz, 1H), 1.74 (s, 3H), 1.20 (d,  $J = 1.2$  Hz, 3H) ppm.

$^{13}\text{C NMR}$  (101 MHz,  $\text{CDCl}_3$ )  $\delta$  191.1, 173., 166.3, 163.8, 161.3, 153.4, 143.4, 136.7, 134.2 (d,  $J_{\text{C-F}} = 4.9$  Hz), 131.5 (d,  $J_{\text{C-F}} = 9.0$  Hz), 131.0, 130.3, 127.9, 127.2, 126.1, 115.3 (d,  $J_{\text{C-F}} = 21.6$  Hz), 52.67, 50.61, 46.47, 44.34, 42.69, 39.19, 22.29, 20.09 ppm.

$^{19}\text{F NMR}$  (377 MHz,  $\text{CDCl}_3$ )  $\delta = -107.14$  Ppm.

ESI-HRMS calcd  $[\text{C}_{26}\text{H}_{23}\text{FO}_3^+\text{Na}^+] = 425.1532$ , found 425.1529.

IR  $\tilde{\nu}$  ( $\text{cm}^{-1}$ ) 3025, 2960, 2851, 1714, 1636, 1593, 1504, 1407, 1366, 1319, 1225, 1154, 844, 756, 754, 684.

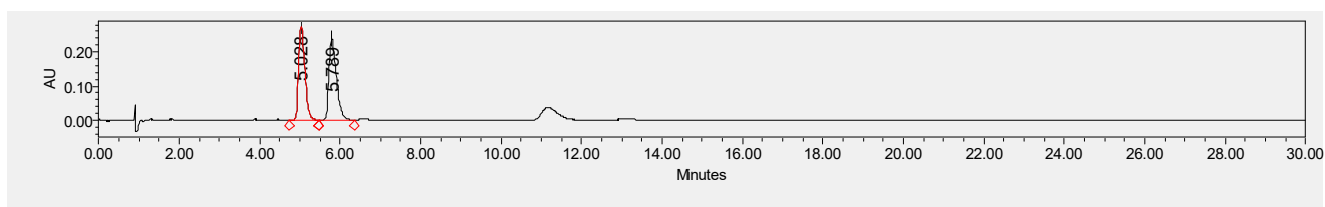

|   | Retention Time | Area    | % Area |
|---|----------------|---------|--------|
| 1 | 5.028          | 3026096 | 49.12  |
| 2 | 5.789          | 3134406 | 50.88  |

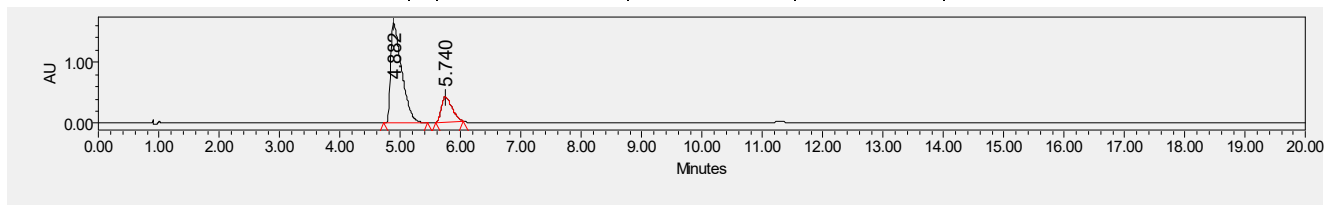

|   | Retention Time | Area     | % Area |
|---|----------------|----------|--------|
| 1 | 4.882          | 20709300 | 80.67  |
| 2 | 5.740          | 4962212  | 19.33  |



**5ac: methyl-1,6-dimethyl-8-(4-methylbenzoyl)-3-phenyltricyclo[3.2.2.0<sup>2,4</sup>]nona -6,8-diene-3-carboxylate**

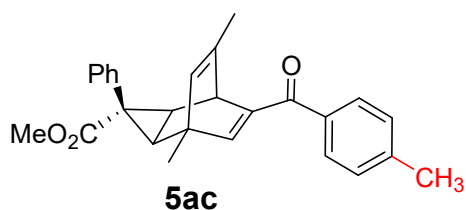

30.8 mg, 77% yield, 19:1dr, 70% ee.; yellow solid, m. p. 173 – 175°C,  $[\alpha]_D^{21} = 5.5$  ( $c = 0.56$ , in  $\text{CH}_2\text{Cl}_2$ ).

HPLC (Daicel chiralcel IA-3,  $\text{CO}_2/\text{MeOH}$  90/10, 1.5 mL/min,  $\lambda = 254$  nm),  $t_R(\text{major}) = 2.92$  min,  $t_R(\text{minor}) = 3.55$  min.

$^1\text{H NMR}$  (400 MHz,  $\text{Chloroform-}d$ )  $\delta$  7.57 (d,  $J = 8.0$  Hz, 2H), 7.26 – 7.20 (m, 4H), 7.19 – 7.14 (m, 2H), 7.06 – 7.00 (m, 2H),

4.83 (s, 1H), 4.33 (m, 1H), 3.51 (s, 3H), 2.51 (dd,  $J = 9.2, 4.4$  Hz, 1H), 2.40 (s, 3H), 2.14 (d,  $J = 9.4$  Hz, 1H), 1.73 (s, 3H), 1.20 (d,  $J = 1.2$  Hz, 3H) ppm.

$^{13}\text{C NMR}$  (101 MHz,  $\text{CDCl}_3$ )  $\delta$  192.4, 173.1, 160.9, 153.5, 143.4, 142.5, 136.8, 135.4, 134.3, 131.1, 130.4, 129.3, 128.9, 127.9, 127.2, 126.1, 52.6, 50.6, 46.4, 44.3, 42.8, 39.2, 22.3, 21.6, 20.1 ppm.

ESI-HRMS calcd  $[\text{C}_{27}\text{H}_{26}\text{O}_3 + \text{Na}^+] = 421.1774$ , found 425.1775.

IR  $\tilde{\nu}$  ( $\text{cm}^{-1}$ ) 3025, 2959, 2871, 2361, 2340, 1713, 1635, 1596, 1582, 1435, 1323, 1232, 962, 754, 734.

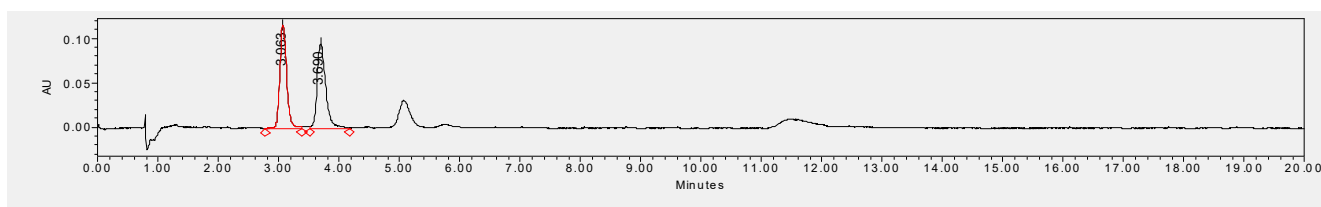

|   | Retention Time | Area   | % Area |
|---|----------------|--------|--------|
| 1 | 3.063          | 927120 | 49.38  |
| 2 | 3.690          | 950419 | 50.62  |

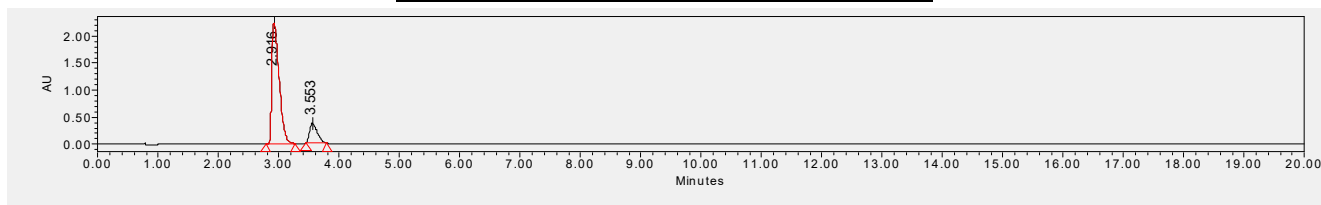

|   | Retention Time | Area     | % Area |
|---|----------------|----------|--------|
| 1 | 2.916          | 18665314 | 85.01  |
| 2 | 3.553          | 3291283  | 14.99  |

**5ad: methyl-8-(4-methoxybenzoyl)-1,6-dimethyl-3-phenyltricyclo[3.2.2.0<sup>2,4</sup>] nona-6,8-diene-3-carboxylate**

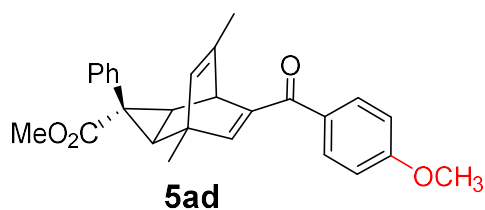

29.3mg, 70% yield, 19:1dr, 66% ee.; yellow solid, m. p. 176 – 178°C,  $[\alpha]_D^{21} = 8.8$  ( $c = 0.49$ , in  $\text{CH}_2\text{Cl}_2$ ).

HPLC (Daicel chiralcel IA-3,  $\text{CO}_2/\text{MeOH}$  90/10, 1.5 mL/min,  $\lambda = 254$  nm),  $t_R(\text{major}) = 3.91$  min,  $t_R(\text{minor}) = 5.09$  min.

$^1\text{H NMR}$  (400 MHz,  $\text{Chloroform-}d$ )  $\delta = 7.72 - 7.65$  (m, 2H), 7.22–7.25 (m, 2H), 7.19 – 7.13 (m, 2H), 7.05 – 7.01 (m, 1H), 6.99 (d,  $J = 1.2$  Hz, 1H), 6.93 – 6.88 (m, 2H), 4.84 (s, 1H), 4.30 (m, 1H), 3.86 (s, 3H), 3.50 (s, 3H), 2.51 (dd,  $J = 9.4, 4.2$  Hz, 1H), 2.14 (d,  $J = 9.4$  Hz, 1H), 1.74 (s, 3H), 1.20 (d,  $J = 1.5$  Hz, 3H) ppm.

$^{13}\text{C NMR}$  (101 MHz,  $\text{CDCl}_3$ )  $\delta$  191.5, 173.1, 162.8, 159.9, 153.5, 143.4, 136.8, 134.3, 131.4, 131.1, 130.7, 130.4, 127.9, 127.2, 126.1, 113.4, 55.4, 52.6, 50.6, 46.3, 44.7, 42.8, 39.3, 22.3, 20.1 ppm.

ESI-HRMS calcd  $[\text{C}_{27}\text{H}_{26}\text{O}_4 + \text{Na}^+] = 437.1723$ , found 437.1721.

IR  $\tilde{\nu}$  ( $\text{cm}^{-1}$ ) 2958, 1713, 1630, 1598, 1508, 1443, 1324, 1234, 1168, 1027, 962, 840, 814, 757, 734, 703.

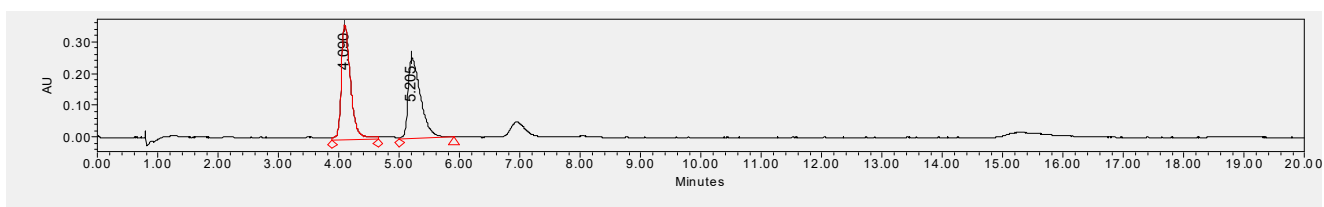

| - | Retention Time | Area    | % Area |
|---|----------------|---------|--------|
| 1 | 4.090          | 3919390 | 51.97  |
| 2 | 5.205          | 3622855 | 48.03  |

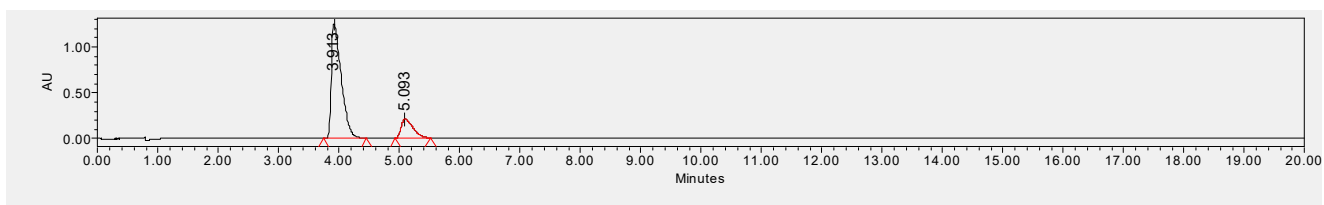

|   | Retention Time | Area     | % Area |
|---|----------------|----------|--------|
| 1 | 3.913          | 14400580 | 83.21  |
| 2 | 5.093          | 2906623  | 16.79  |

**5ae: methyl-8-(2-methoxybenzoyl)-1,6-dimethyl-3-phenyltricyclo[3.2.2.0<sup>2,4</sup>] nona-6,8-diene-3-carboxylate**

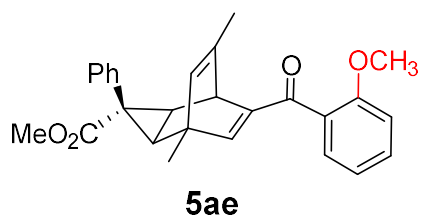

36.5 mg, 88% yield, 19:1dr, 81% ee.; yellow solid, m. p. 179 – 181°C,  $[\alpha]_D^{21} = 26.8$  ( $c = 0.54$ , in  $\text{CH}_2\text{Cl}_2$ ).

HPLC (Daicel chiralcel ID-3,  $\text{CO}_2/\text{MeOH}$  95/5, 1.5 mL/min,  $\lambda = 254$  nm),  $t_R(\text{major}) = 13.25$  min,  $t_R(\text{minor}) = 17.95$  min.

$^1\text{H NMR}$  (400 MHz,  $\text{Chloroform-}d$ )  $\delta = 7.42 - 7.36$  (m, 1H), 7.26 – 7.20 (m, 2H), 7.20 – 7.13 (m, 3H), 7.04 – 6.99 (m, 1H), 6.98 – 6.91 (m, 2H), 6.89 (d,  $J = 1.2$  Hz, 1H), 4.77 (s, 1H), 4.36 (dt,  $J = 3.7, 1.7$  Hz, 1H), 3.77 (s, 3H), 3.50 (s, 3H), 2.48 (dd,  $J = 9.4, 4.2$  Hz, 1H), 2.10 (d,  $J = 9.4$  Hz, 1H), 1.67 (s, 3H), 1.20 (d,  $J = 1.2$  Hz, 3H) ppm.

$^{13}\text{C NMR}$  (101 MHz,  $\text{CDCl}_3$ )  $\delta = 192.1, 173.2, 161.8, 157.1, 155.0, 143.3, 136.8, 134.2, 131.2, 131.0, 130.3, 129.1, 129.1, 127.9, 127.2, 126.0, 119.9, 111.5, 55.7, 52.6, 50.5, 46.3, 42.9, 42.6, 39.1, 22.2, 20.0$  ppm.

ESI-HRMS calcd  $[\text{C}_{27}\text{H}_{26}\text{O}_4 + \text{Na}^+] = 437.1723$ , found 437.1721.

IR  $\tilde{\nu}$  ( $\text{cm}^{-1}$ ) 2958, 2359, 1714, 1644, 1597, 1487, 1434, 1326, 1236, 1077, 1047, 1023, 755, 733.

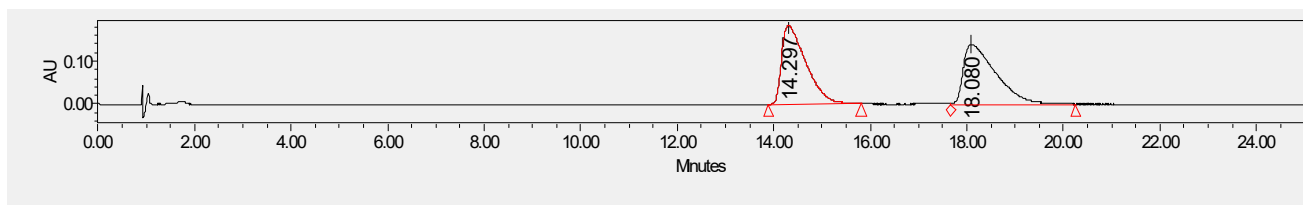

|   | Retention Time | Area    | % Area |
|---|----------------|---------|--------|
| 1 | 14.297         | 6436994 | 49.73  |
| 2 | 18.080         | 6507223 | 50.27  |

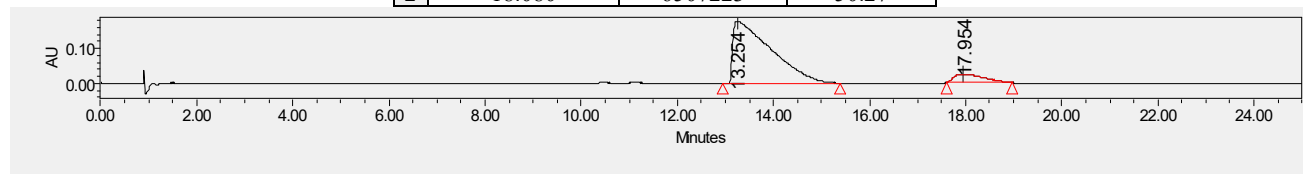

|   | Retention Time | Area    | % Area |
|---|----------------|---------|--------|
| 1 | 13.254         | 9937692 | 90.51  |
| 2 | 17.954         | 1041618 | 9.49   |

**5af: methyl-1,6-dimethyl-3-phenyl-8-(thiophene-3-carbonyl)tricyclo[3.2.2.0<sup>2,4</sup>]nona-6,8-diene-3-carboxylate**

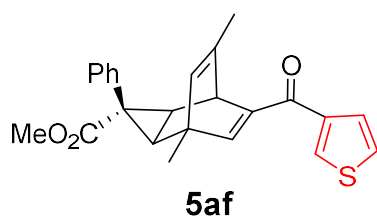

24.6 mg, 63% yield, 19:1dr, 53% ee.; yellow solid, m. p. 169 – 171°C,  
 $[\alpha]_D^{21} = 6.3$  ( $c = 0.52$ , in  $\text{CH}_2\text{Cl}_2$ ).

HPLC (Daicel chiralcel ID-3,  $\text{CO}_2/\text{MeOH}$  95/5, 1.5 mL/min,  $\lambda = 254$  nm),  $t_R(\text{major}) = 10.56$  min,  $t_R(\text{minor}) = 13.22$  min.

$^1\text{H NMR}$  (400 MHz,  $\text{Chloroform-}d$ )  $\delta = 7.61$  (dd,  $J = 5.2, 1.2$  Hz, 1H), 7.58 (dd,  $J = 3.6, 1.2$  Hz, 1H), 7.30 (d,  $J = 1.2$  Hz, 1H), 7.25 – 7.22 (m, 2H), 7.19 – 7.12 (m, 2H), 7.09 (m, 1H), 7.06 – 7.01 (m, 1H), 4.84 (s, 1H), 4.28 (m, 1H), 3.50 (s, 3H), 2.51 (dd,  $J = 9.4, 4.2$  Hz, 1H), 2.15 (d,  $J = 9.4$  Hz, 1H), 1.78 (s, 3H), 1.19 (d,  $J = 1.2$  Hz, 3H) ppm.

$^{13}\text{C NMR}$  (101 MHz,  $\text{CDCl}_3$ )  $\delta = 183.8, 173.0, 159.1, 153.5, 143.3, 143.2, 136.7, 134.3, 133.0, 132.6, 131.0, 130.3, 127.9, 127.7, 127.2, 126.1, 52.6, 50.7, 46.4, 44.8, 42.7, 39.2, 22.4, 20.0$  ppm.

ESI-HRMS calcd [ $\text{C}_{24}\text{H}_{22}\text{O}_3\text{S}^+\text{Na}^+$ ] = 413.1182, found 413.1183.

IR  $\tilde{\nu}$  ( $\text{cm}^{-1}$ ) 2959, 2358, 1713, 1614, 1582, 1513, 1414, 1368, 1234, 1050, 961, 861, 798, 758, 701.

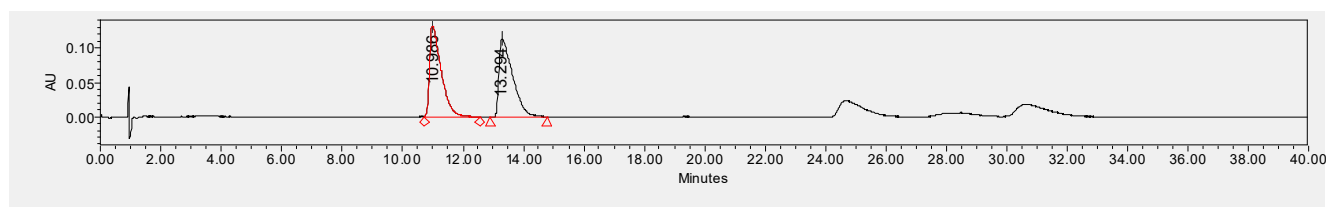

|   | Retention Time | Area    | % Area |
|---|----------------|---------|--------|
| 1 | 10.986         | 3592236 | 49.76  |
| 2 | 13.294         | 3627138 | 50.24  |

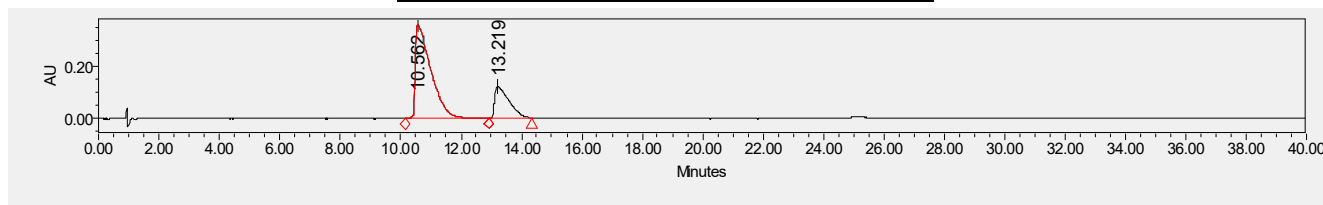

|   | Retention Time | Area     | % Area |
|---|----------------|----------|--------|
| 1 | 10.562         | 12805918 | 76.26  |
| 2 | 13.219         | 3987432  | 23.74  |

**5ag:** methyl--8-(2-naphthoyl)-1,6-dimethyl-3-phenyltricyclo[3.2.2.0<sup>2,4</sup>]nona-6,8-diene-3-carboxylate

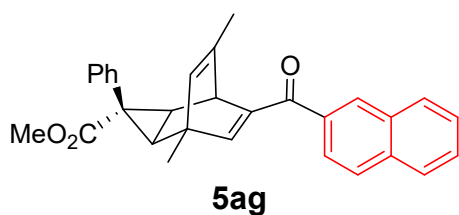

34.3mg, 63% yield, 19:1dr, 63% ee.; yellow solid, m. p. 182 – 183°C,  $[\alpha]_D^{21} = 2.1$  ( $c = 0.76$ , in  $\text{CH}_2\text{Cl}_2$ ).

HPLC (Daicel chiralcel IA-3,  $\text{CO}_2/\text{MeOH}$  90/10, 1.5 mL/min,  $\lambda = 254$  nm),  $t_R(\text{major}) = 5.92$  min,  $t_R(\text{minor}) = 7.09$  min.

$^1\text{H NMR}$  (400 MHz,  $\text{Chloroform-}d$ )  $\delta$  8.13 (s, 1H), 7.97 – 7.85 (m, 3H), 7.77 (m, 1H), 7.62 – 7.51 (m, 2H), 7.30 – 7.26 (m, 1H), 7.26 – 7.23 (m, 1H), 7.22 – 7.16 (m, 2H), 7.12 (s, 1H), 7.06 (m, 1H), 4.89 (s, 1H), 4.53 – 4.32 (m, 1H), 3.52 (s, 3H), 2.57 (dd,  $J = 9.4, 4.2$  Hz, 1H), 2.19 (d,  $J = 9.4$  Hz, 1H), 1.75 (s, 3H), 1.25 (d,  $J = 1.4$  Hz, 3H) ppm.

$^{13}\text{C NMR}$  (101 MHz,  $\text{CDCl}_3$ )  $\delta$  192.5, 173.1, 161.6, 153.7, 143.4, 136.8, 135.4, 135.0, 134.3, 132.3, 131.1, 130.4, 130.0, 129.2, 128.2, 128.0, 127.9, 127.8, 127.2, 126.7, 126.1, 125.4, 52.7, 50.6, 46.5, 44.3, 42.8, 39.3, 22.3, 20.2 ppm.

ESI-HRMS calcd  $[\text{C}_{30}\text{H}_{26}\text{O}_3\text{Na}^+] = 457.1774$ , found 457.1775.

IR  $\tilde{\nu}$  ( $\text{cm}^{-1}$ ) 2959, 2328, 1714, 1624, 1581, 1434, 1364, 1321, 1233, 1128, 961, 824, 798, 760, 731, 480.

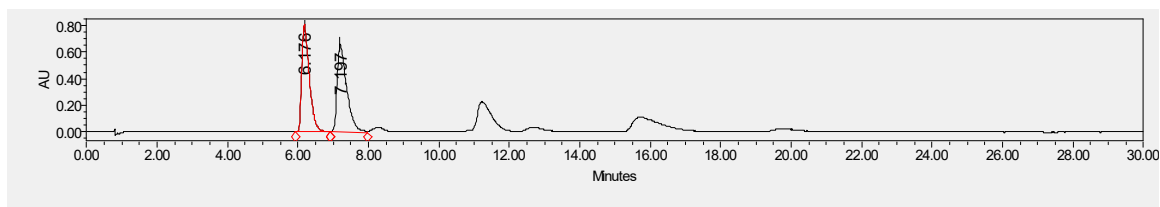

|   | Retention Time | Area     | % Area |
|---|----------------|----------|--------|
| 1 | 6.176          | 12128152 | 49.24  |
| 2 | 7.197          | 12504236 | 50.76  |

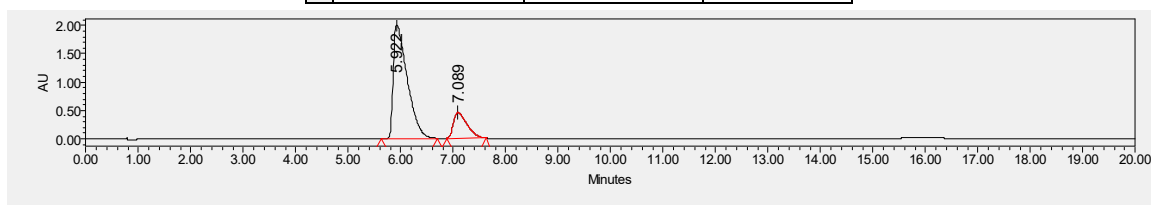

|   | Retention Time | Area     | % Area |
|---|----------------|----------|--------|
| 1 | 5.922          | 37051687 | 81.95  |
| 2 | 7.089          | 8160612  | 18.05  |

**6: (-7-(hydroxy(phenyl)methyl)-1,9-dimethyl-3-phenyltricyclo[3.2.2.0<sup>2,4</sup>]non-8-ene-3,6-diyl)di-methanol**

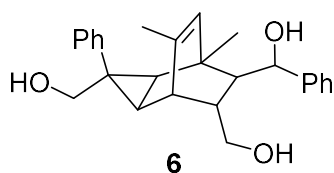

27.7 mg, 71% yield, 19:1dr, 90% ee.; white solid, m. p. 186 – 187 °C,  $[\alpha]_D^{21} = -25.5$  ( $c = 0.42$ , in  $\text{CH}_2\text{Cl}_2$ ).

HPLC (Daicel chiralcel ODH,  $\text{CO}_2/\text{MeOH}$  80/20, 1.0 mL/min,  $\lambda = 254$  nm),  $t_R(\text{major}) = 18.50$  min,  $t_R(\text{minor}) = 22.50$  min.

$^1\text{H NMR}$  (400 MHz, Chloroform- $d$ )  $\delta$  7.20 – 7.11 (m, 6H), 7.05 (t,  $J = 7.2$  Hz, 1H), 6.98 (d,  $J = 7.6$  Hz, 1H), 6.93 (d,  $J = 7.6$  Hz, 1H), 4.74 (d,  $J = 4.8$  Hz, 1H), 4.20 (s, 1H), 3.64 (m, 1H), 3.57 – 3.37 (m, 3H), 3.28 (dd,  $J = 10.8, 6.0$  Hz, 1H), 3.16 (dd,  $J = 10.8, 6.0$  Hz, 1H), 2.61 – 2.43 (m, 1H), 1.80 – 1.75 (m, 1H), 1.70 – 1.48 (m, 5H), 1.32 (dd,  $J = 8.8, 4.0$  Hz, 1H), 1.14 (d,  $J = 8.8$  Hz, 1H), 0.78 (d,  $J = 1.6$  Hz, 3H) ppm.

$^{13}\text{C NMR}$  (101 MHz,  $\text{CDCl}_3$ )  $\delta$  142.1, 140.1, 136.5, 129.9, 128.9, 128.4, 127.1, 126.8, 126.6, 126.5, 126.1, 124.3, 73.4, 72.1, 65.1, 56.8, 42.9, 38.1, 37.0, 34.4, 33.0, 23.6, 21.2, 18.8.

ESI-HRMS calcd  $[\text{C}_{26}\text{H}_{30}\text{O}_3 + \text{Na}^+] = 413.2087$ , found 413.2086.

IR  $\tilde{\nu}$  ( $\text{cm}^{-1}$ ) 3293, 2927, 2868, 1600, 1493, 1446, 1374, 1264, 1088, 1027, 915, 816, 762, 734, 701, 558, 531 ppm.

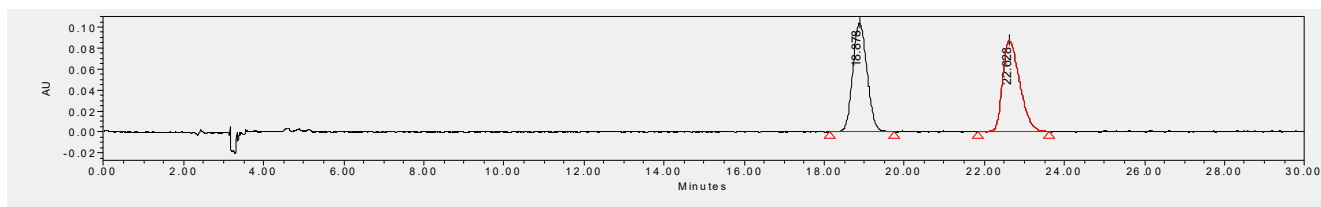

|   | Retention Time | Area    | % Area |
|---|----------------|---------|--------|
| 1 | 18.878         | 2548637 | 49.84  |
| 2 | 22.628         | 2564536 | 50.16  |

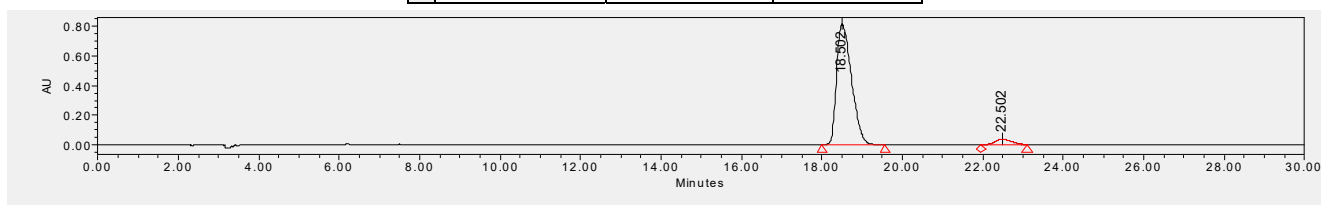

|   | Retention Time | Area     | % Area |
|---|----------------|----------|--------|
| 1 | 18.502         | 21084544 | 95.23  |
| 2 | 22.502         | 1055334  | 4.77   |

## 12. References

- [1] (a) Wen, Y. H.; Huang, X.; Huang, J. L.; Xiong, Y.; Qin, B.; Feng, X. M. *Synlett.* **2005**, *16*, 2445–2448. (b) Yu, Z. P.; Liu, X. H.; Dong, Z. H.; Xie, M. S.; Feng, X. M. *Angew. Chem. Int. Ed.* **2008**, *47*, 1308–1311; *Angew. Chem.* **2008**, *120*, 1328–1331; (c) Zheng, K.; Qin, B.; Liu, X. H.; Feng, X. M. *J. Org. Chem.* **2007**, *72*, 8478–8483; d) Zhang, D.; Su, Z. S.; He, Q. W.; Wu, Z. K.; Zhou, Y. Q.; Pan, C. J.; Liu, X. H.; Feng, X. M. *J. Am. Chem. Soc.* **2020**, *142*, 15975–15985; e) Shang, D. J.; Xin, J. G.; Liu, Y. L.; Zhou, X.; Liu, X. H.; Feng, X. M. *J. Org. Chem.* **2008**, *73*, 630–637; (f) Li, X. Q.; Zeng, H. K.; Lin, L. L.; Feng, X. M. *Org. Lett.* **2021**, *23*, 2954–2958.
- [2] Duan, J. D.; Xu, G. C.; Ding, X. J.; Mao, Y. Y.; Rong, B. S.; Zhu, N.; Fang, Z.; Li, Z. J.; Guo, K. J. *Org. Chem.* **2020**, *85*, 2532–2542.
- [3] Lin, X. B.; Tang, Y.; Yang, W.; Tan, F.; Lin, L. L.; Liu, X. H.; Feng, X. M. *J. Am. Chem. Soc.* **2018**, *140*, 3299–3305
- [4] Guo, Y. J.; Nguyen, T. V.; Koenigs, R. M. *Org. Lett.* **2019**, *21*, 8814–8818.
- [5] Choudhury, A. R.; Manna, M. S.; Mukherjee, S. *Chem. Sci.* **2017**, *8*, 6686–6690.
- [6] Sheldrick, G. M. *Acta Cryst.* **2008**, *A64*, 112–122.
- [7] Sheldrick, G. M. *Acta Cryst.* **2015**, *A71*, 3–8.
- [8] Sheldrick, G. M. *Acta Cryst.* **2015**, *C71*, 3–8.
- [9] Dolomanov, O.V., Bourhis, L.J., Gildea, R.J., Howard, J. A. K., Puschmann, H. *J. Appl. Cryst.* **2009**, *42*, 339–341.
- [10] Spek, A. L. *J. Appl. Cryst.* **2003**, *36*, 7–13.
- [11] M. J. Frisch, G. W. Trucks, H. B. Schlegel, G. E. Scuseria, M. A. Robb, J. R. Cheeseman, G. Scalmani, V. Barone, G. A. Petersson, H. Nakatsuji, X. Li, M. Caricato, A. V. Marenich, J. Bloino, B. G. Janesko, R. Gomperts, B. Mennucci, H. P. Hratchian, J. V. Ortiz, A. F. Izmaylov, J. L. Sonnenberg, Williams, F. Ding, F. Lipparini, F. Egidi, J. Goings, B. Peng, A. Petrone, T. Henderson, D. Ranasinghe, V. G. Zakrzewski, J. Gao, N. Rega, G. Zheng, W. Liang, M. Hada, M. Ehara, K. Toyota, R. Fukuda, J. Hasegawa, M. Ishida, T. Nakajima, Y. Honda, O. Kitao, H. Nakai, T. Vreven, K. Throssell, J. A. Montgomery Jr., J. E. Peralta, F. Ogliaro, M. J. Bearpark, J. J. Heyd, E. N. Brothers, K. N. Kudin, V. N. Staroverov, T. A. Keith, R. Kobayashi, J. Normand, K. Raghavachari, A. P. Rendell, J. C. Burant, S. S. Iyengar, J. Tomasi, M. Cossi, J. M. Millam, M. Klene, C. Adamo, R. Cammi, J. W. Ochterski, R. L. Martin, K. Morokuma, O. Farkas, J. B. Foresman, D. J. Fox, Gaussian 09, Rev. D.01; Gaussian, Inc., Wallingford CT, 2013.9.
- [12] Y. Zhao and D. G. Truhlar, *Theor. Chem. Acc.*, **2008**, *120*, 215.
- [13] L. Goerigk, S. A Grimme, *Phys. Chem. Chem. Phys.*, **2011**, *13*, 6670.
- [14] A. V. Marenich, C. J. Cramer, D. G. Truhlar, *J. Phys. Chem. B*, **2009**, *113*, 6378.
- [15] A. Schaefer, H. Horn, and R. Ahlrichs, *J. Chem. Phys.*, **1992**, *97*, 2571.
- [16] F. Weigend, R. Ahlrichs, *Phys. Chem. Chem. Phys.*, **2005**, *7*, 3297.
- [17] P. J. Stephens, F. J. Devlin, C. F. Chabalowski and M. J. Frisch, *J. Phys. Chem.*, **1994**, *98*, 11623.

### 13. Copies of NMR spectra

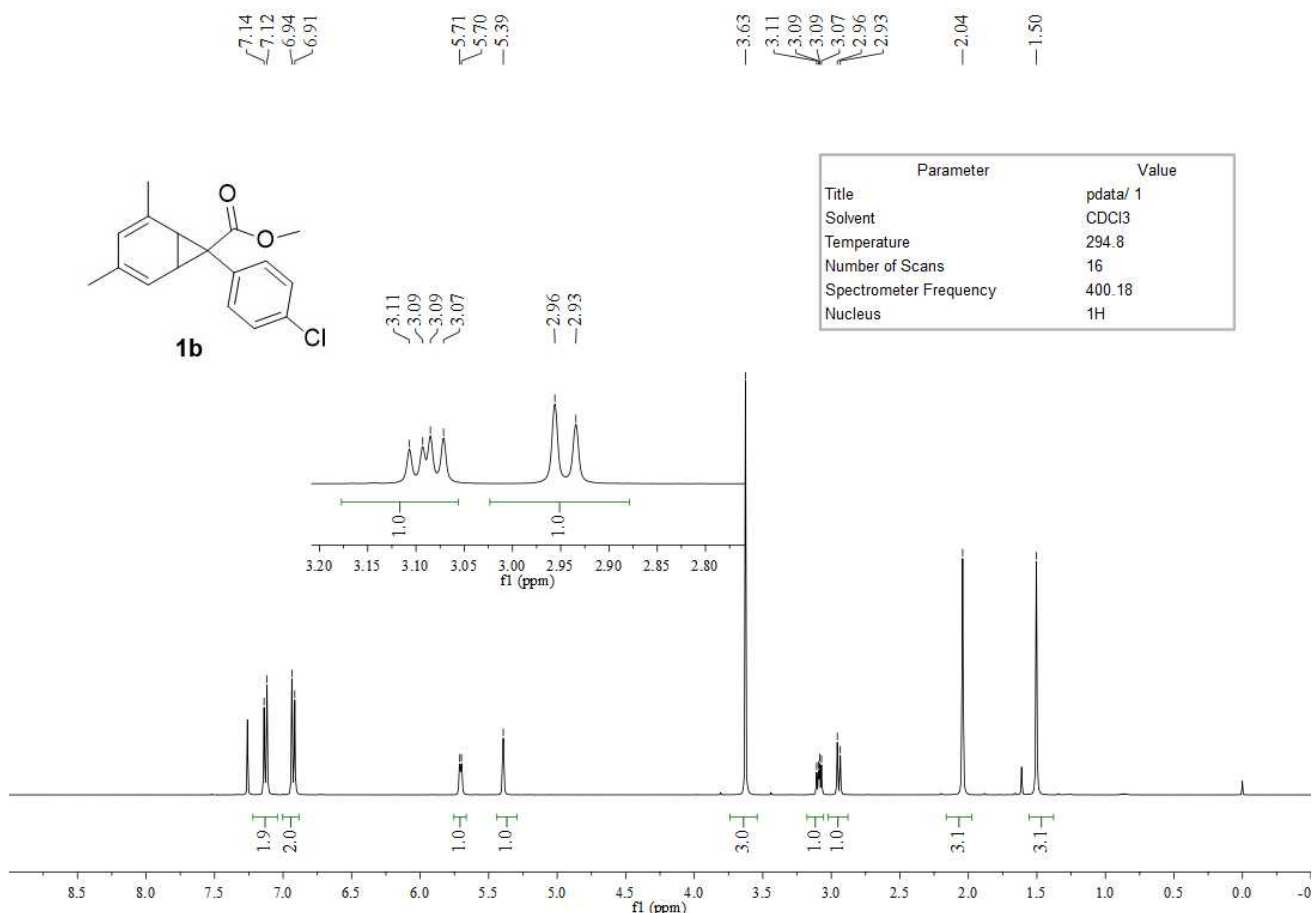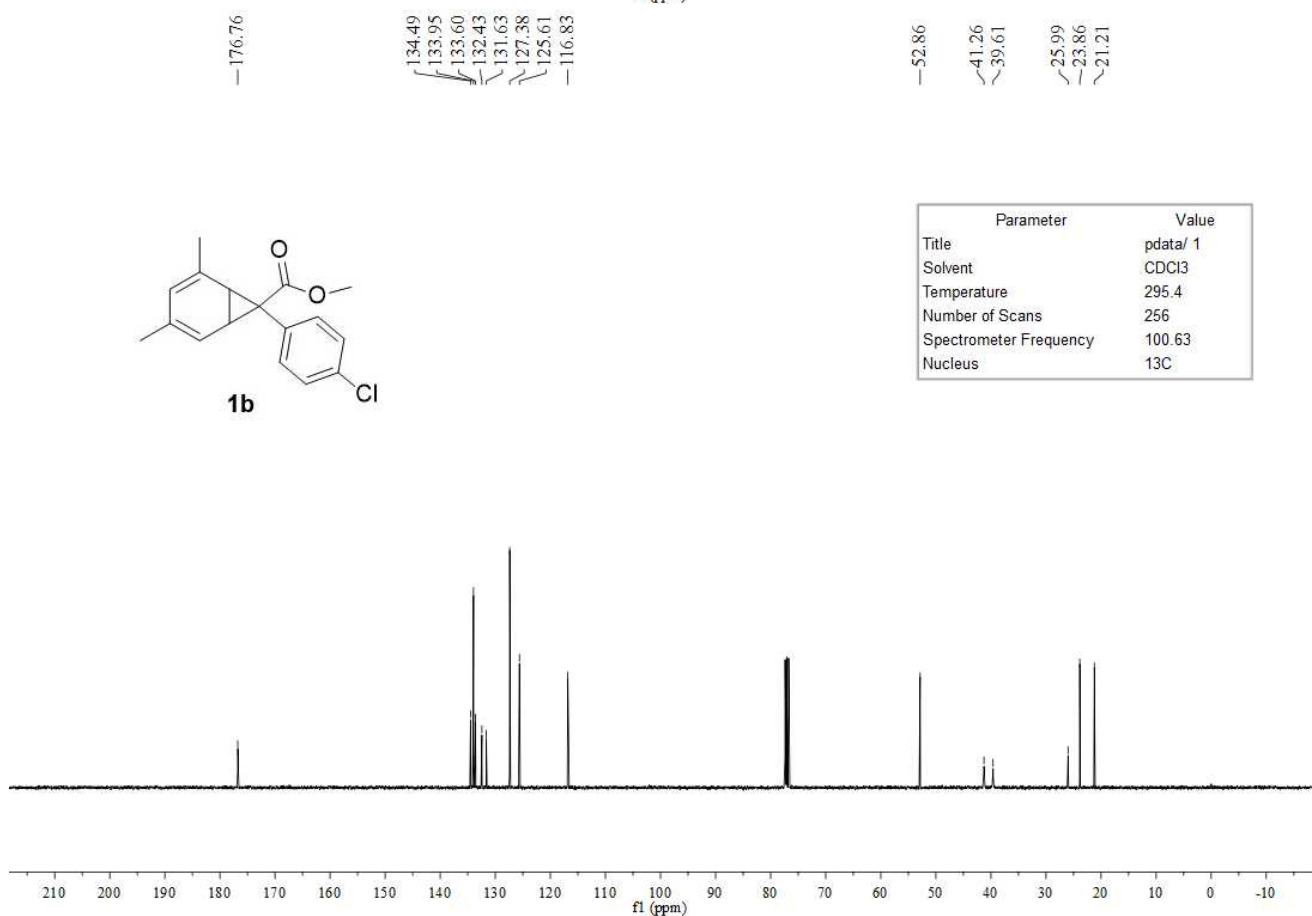



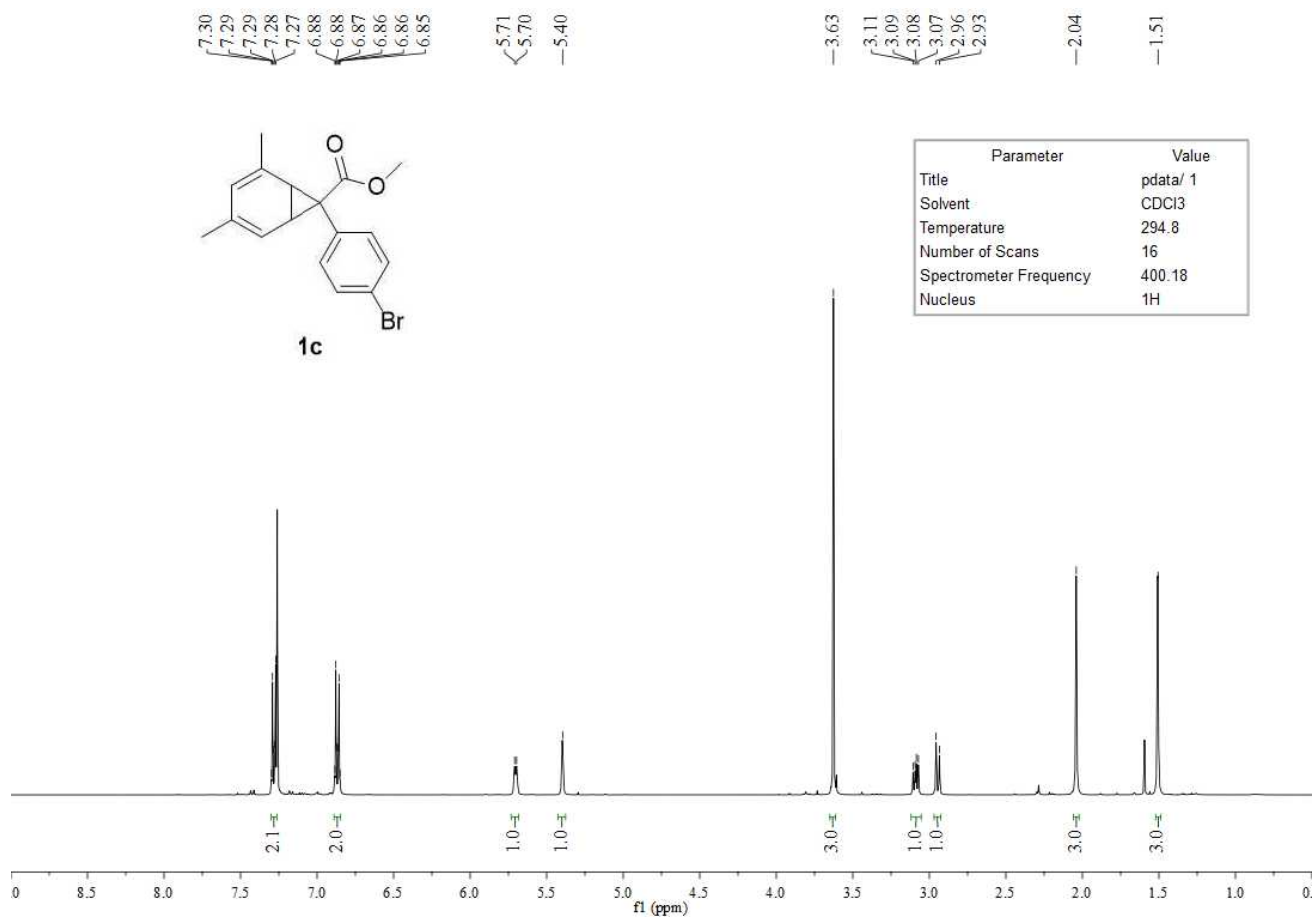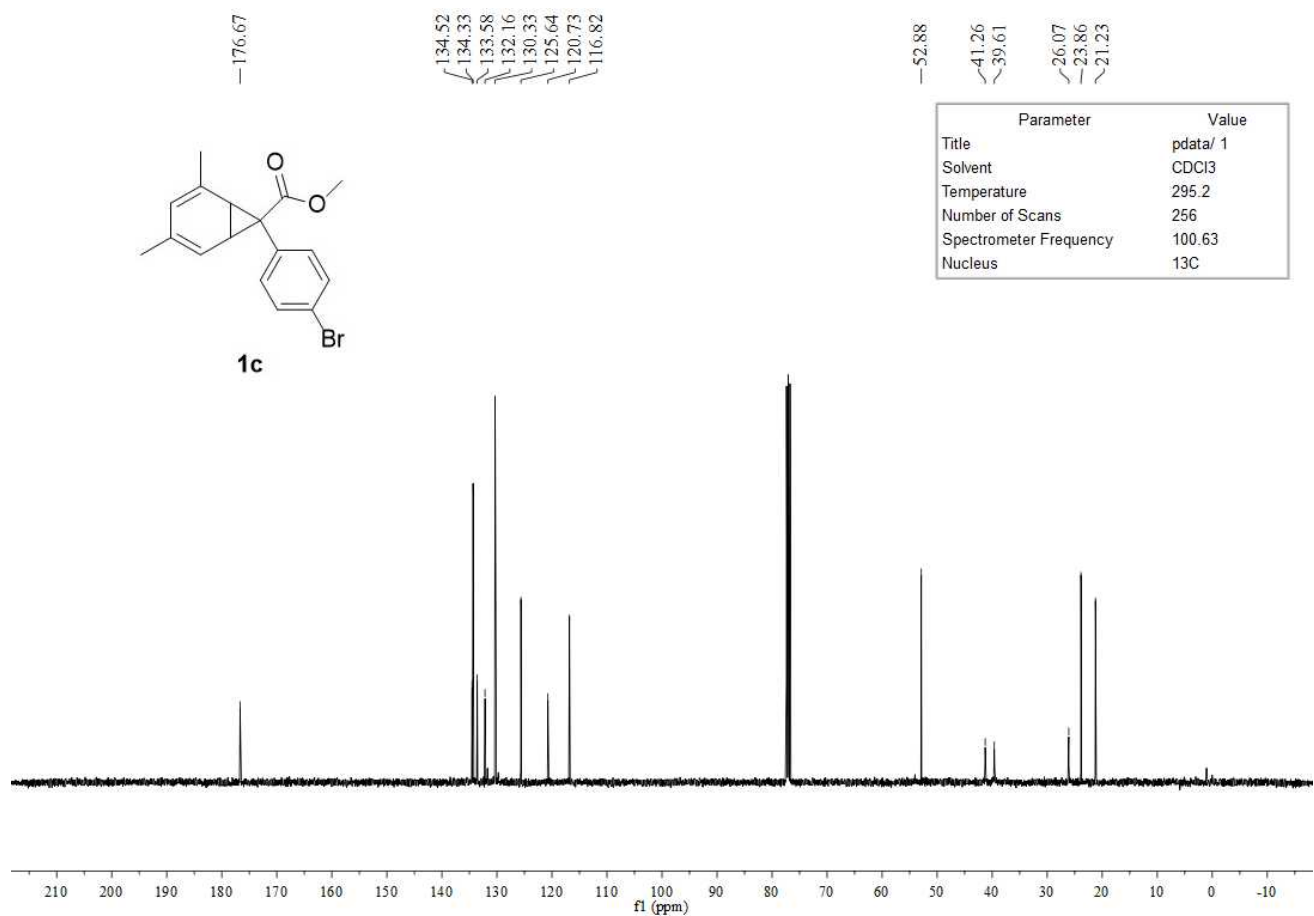

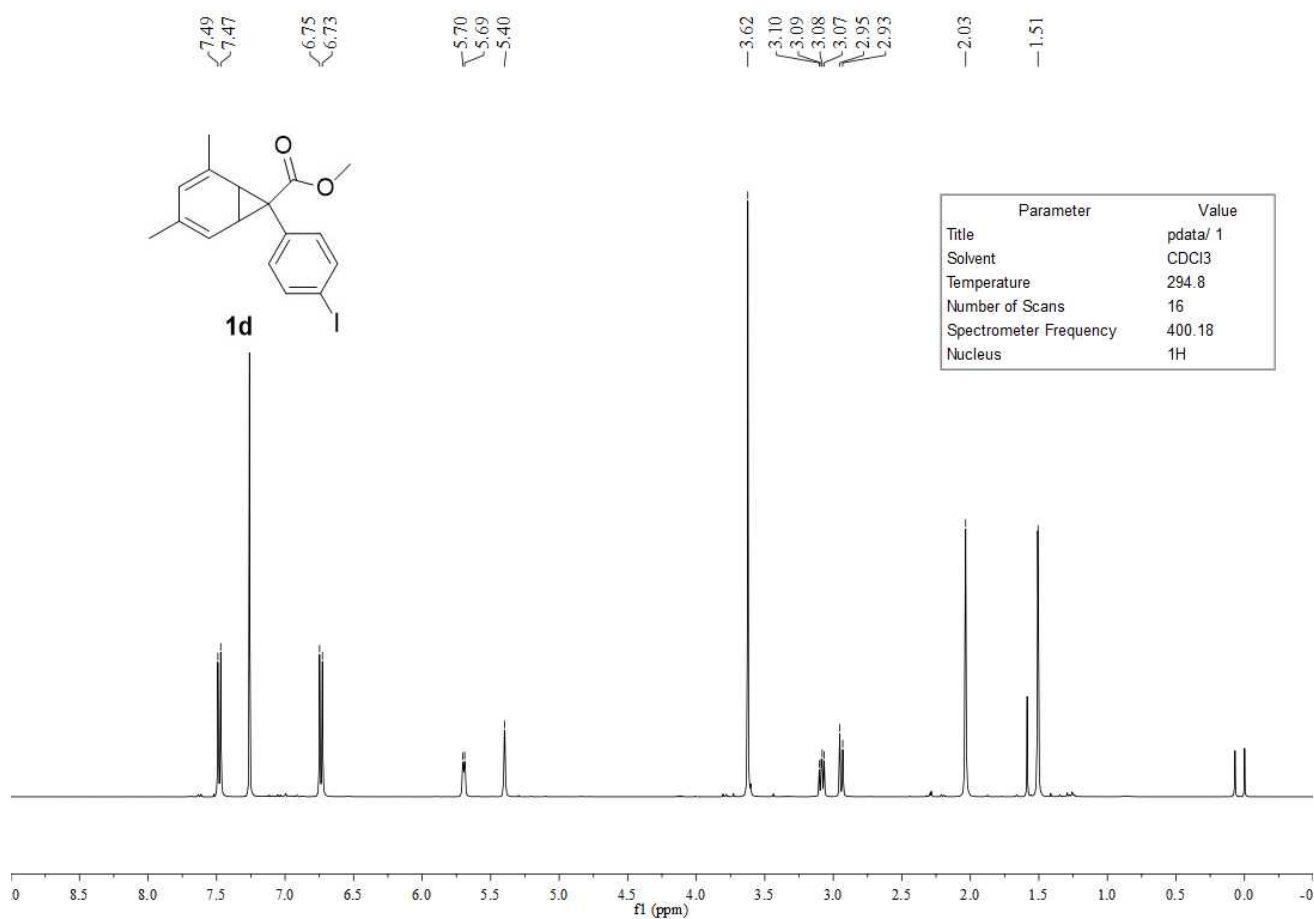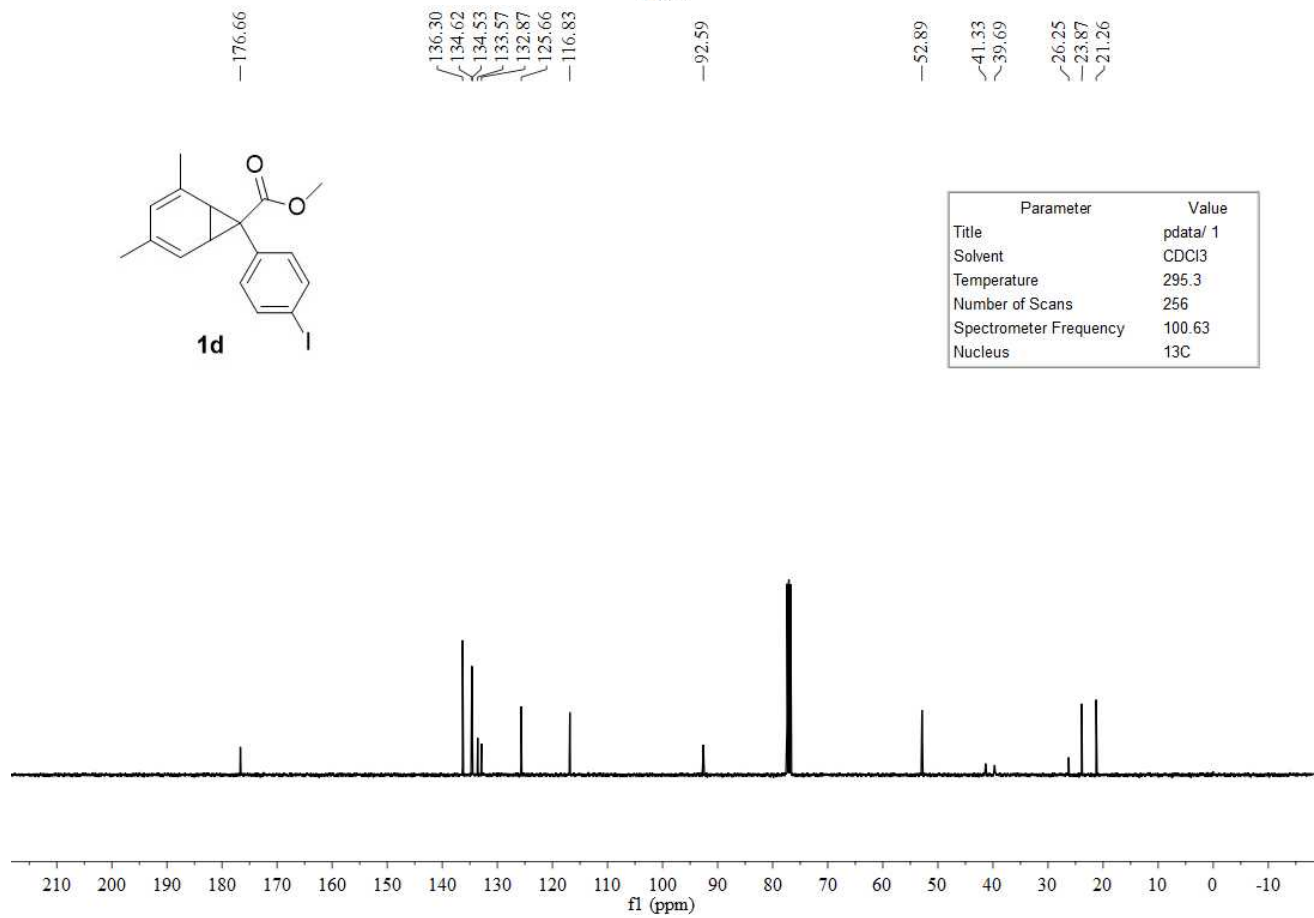

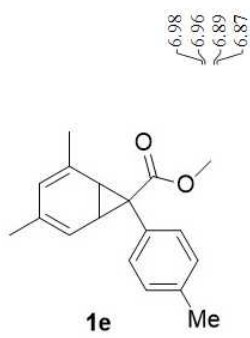

| Parameter              | Value          |
|------------------------|----------------|
| Title                  | pdata/ 1       |
| Solvent                | CDCl3          |
| Temperature            | 294.8          |
| Number of Scans        | 16             |
| Spectrometer Frequency | 400.18         |
| Nucleus                | <sup>1</sup> H |

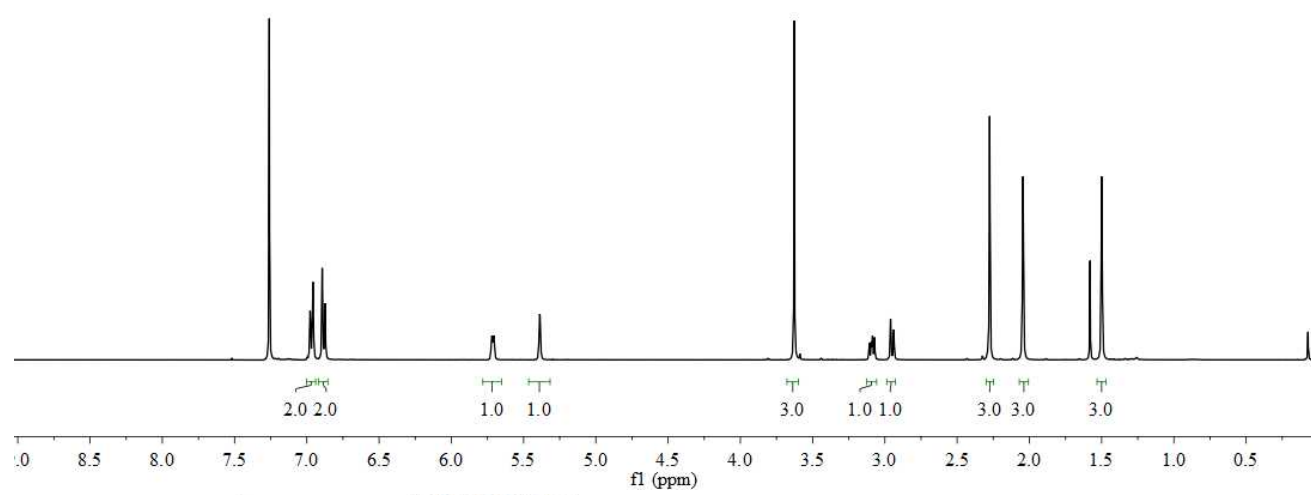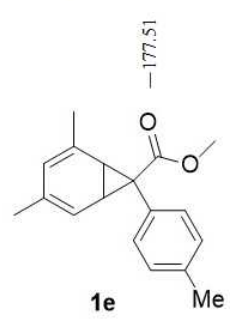

| Parameter              | Value           |
|------------------------|-----------------|
| Title                  | pdata/ 1        |
| Solvent                | CDCl3           |
| Temperature            | 295.3           |
| Number of Scans        | 256             |
| Spectrometer Frequency | 100.63          |
| Nucleus                | <sup>13</sup> C |

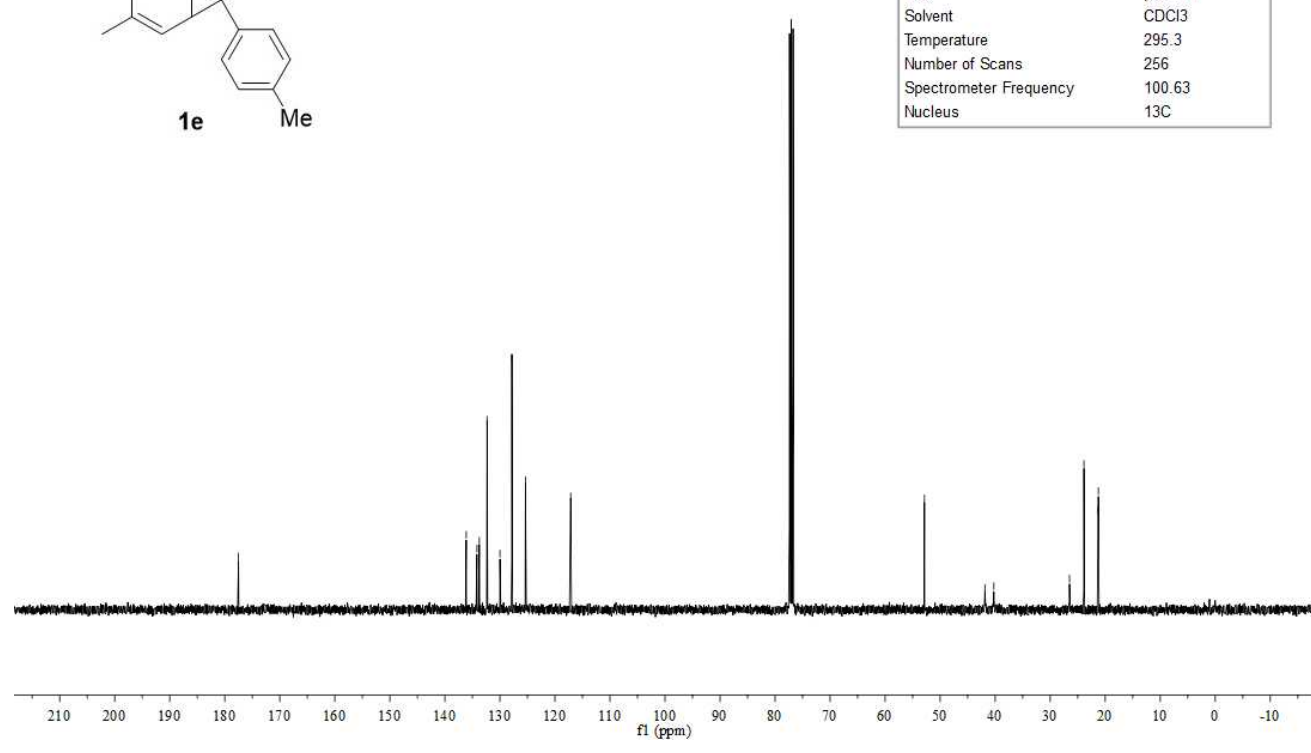

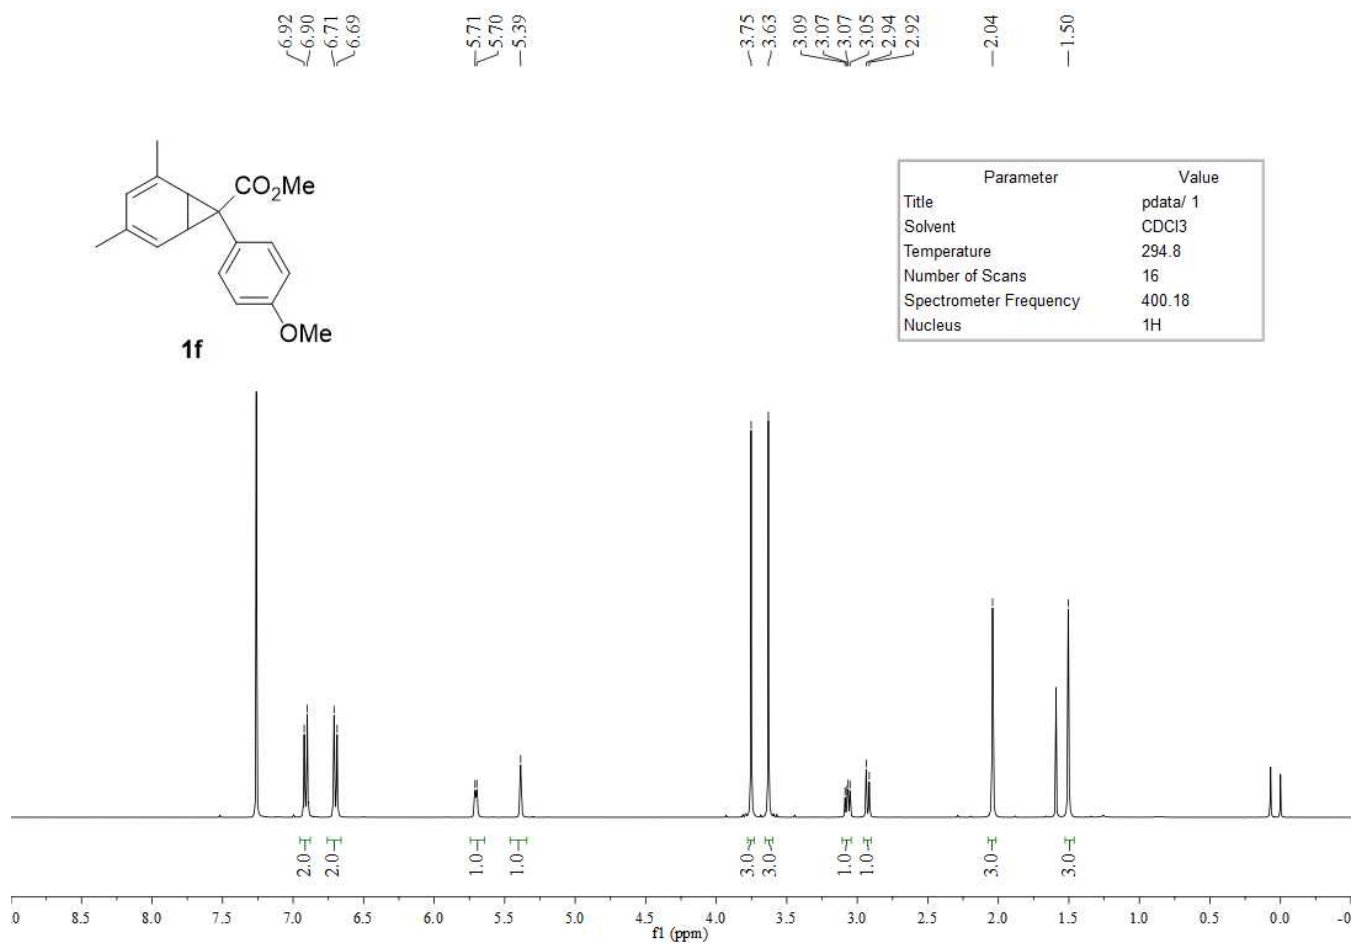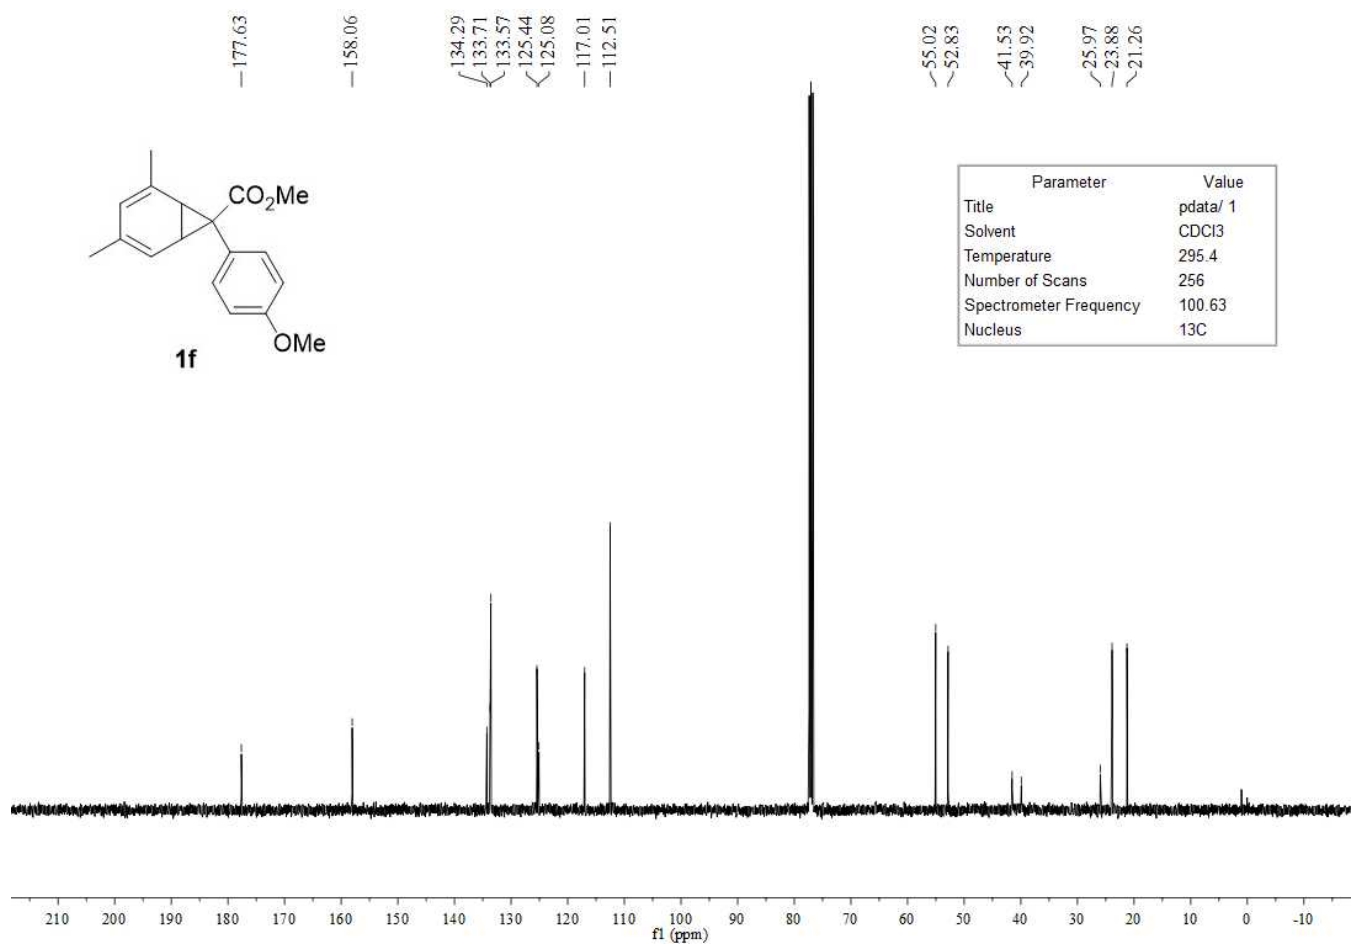

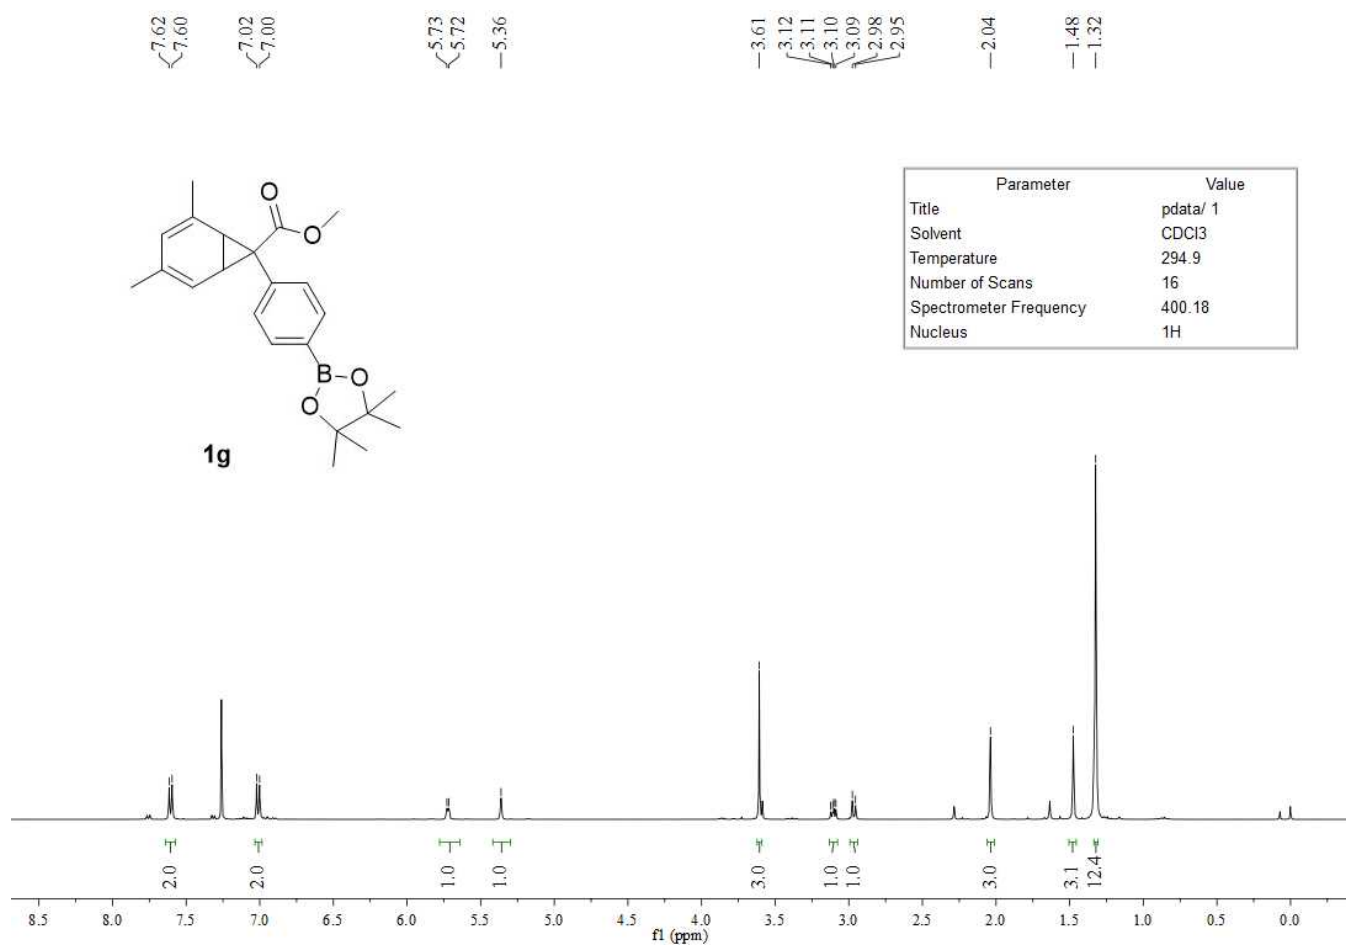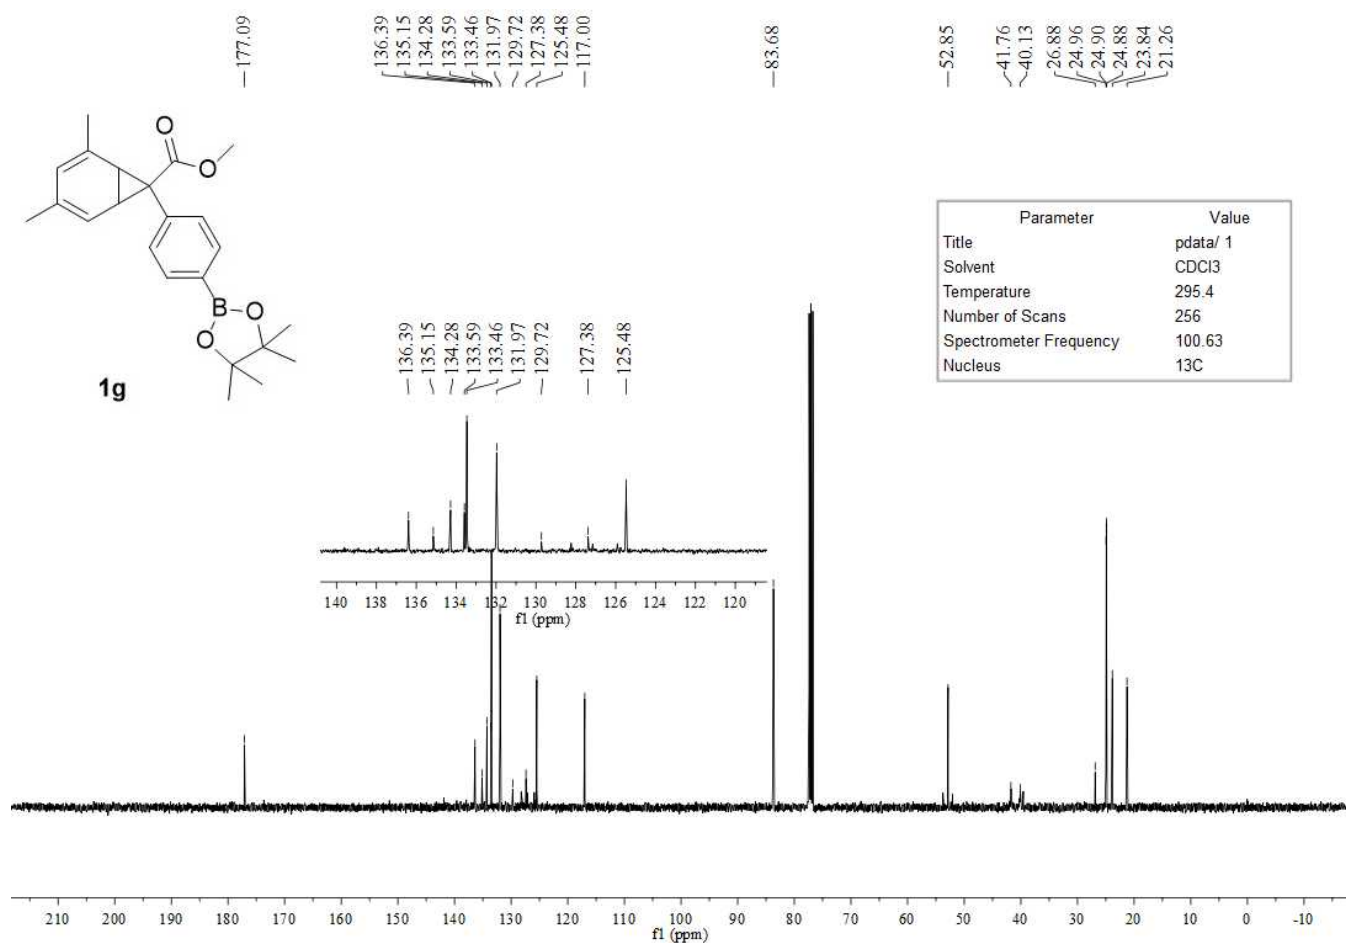

7.28  
7.26  
7.13  
7.13  
7.11  
7.10  
7.09  
7.04  
7.03  
7.02  
7.01  
7.00  
7.00  
6.96  
5.81  
5.80  
5.46

3.66  
3.12  
3.11  
3.10  
3.09  
3.00  
2.99  
2.98  
2.97  
2.96  
2.15  
1.47

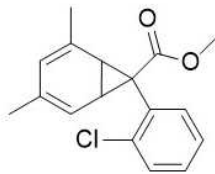

**1h**

| Parameter              | Value    |
|------------------------|----------|
| Title                  | pdata/ 1 |
| Solvent                | CDCl3    |
| Temperature            | 295.0    |
| Number of Scans        | 16       |
| Spectrometer Frequency | 400.18   |
| Nucleus                | 1H       |

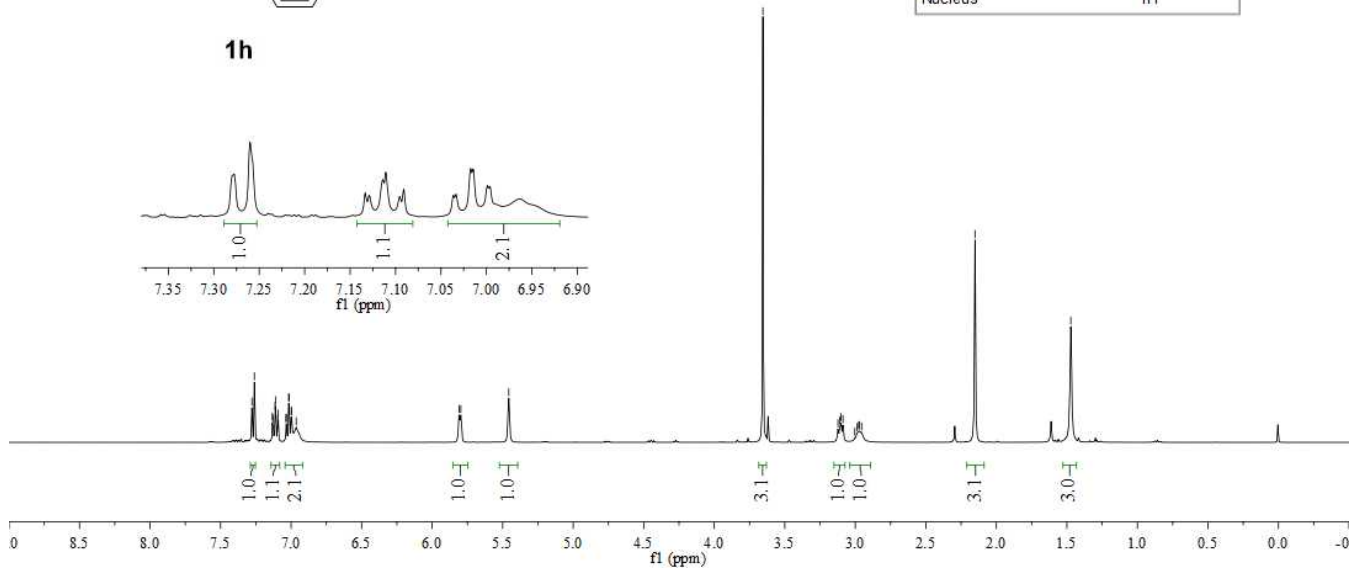

176.35  
136.97  
134.24  
131.22  
129.78  
129.33  
128.22  
125.53  
124.98  
116.51

52.93  
39.75  
38.50  
24.82  
24.17  
21.15

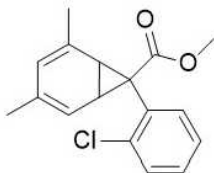

**1h**

| Parameter              | Value    |
|------------------------|----------|
| Title                  | pdata/ 1 |
| Solvent                | CDCl3    |
| Temperature            | 295.4    |
| Number of Scans        | 256      |
| Spectrometer Frequency | 100.63   |
| Nucleus                | 13C      |

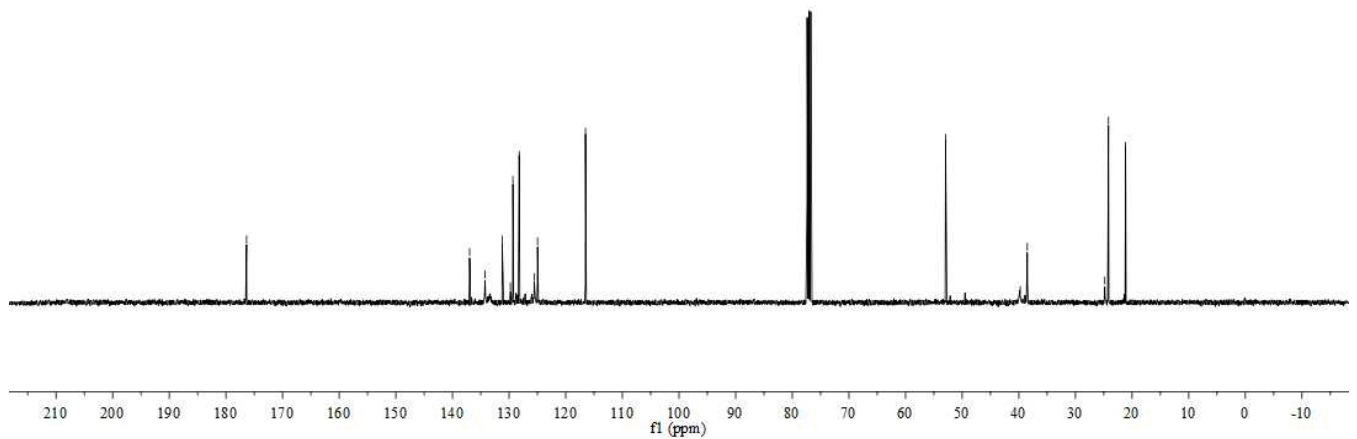

7.17  
7.17  
7.15  
7.15  
7.13  
7.13  
6.88  
6.86  
6.78  
6.76  
6.73  
6.73  
6.71  
6.71  
6.70  
6.69  
5.69  
5.68  
— 5.35

— 3.75  
— 3.63

3.00  
2.99  
2.98  
2.97  
2.93  
2.90

— 2.03

— 1.48

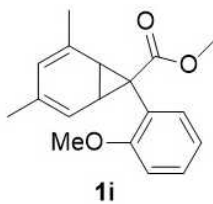

| Parameter              | Value    |
|------------------------|----------|
| Title                  | pdata/ 1 |
| Solvent                | CDCl3    |
| Temperature            | 294.8    |
| Number of Scans        | 16       |
| Spectrometer Frequency | 400.18   |
| Nucleus                | 1H       |

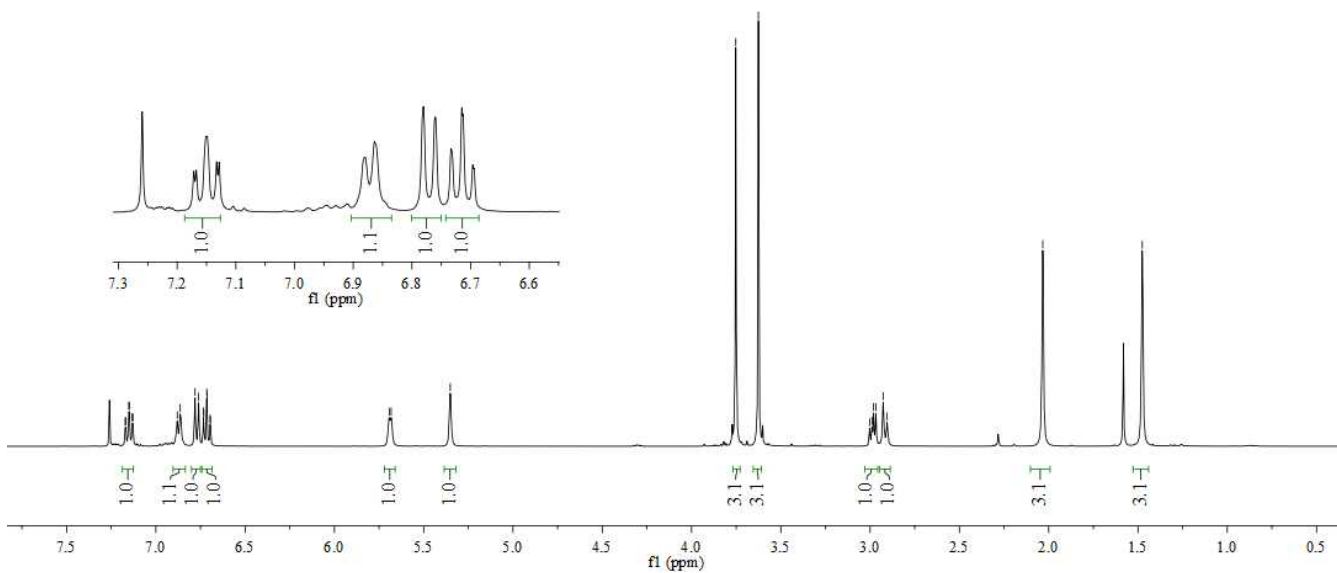

— 177.58

— 159.06

134.13  
128.17  
124.37  
121.05  
118.80  
116.81  
109.95

55.05  
52.74

39.59  
37.44

23.61  
22.06  
21.18

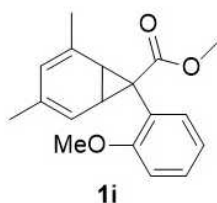

| Parameter              | Value    |
|------------------------|----------|
| Title                  | pdata/ 1 |
| Solvent                | CDCl3    |
| Temperature            | 295.4    |
| Number of Scans        | 256      |
| Spectrometer Frequency | 100.63   |
| Nucleus                | 13C      |

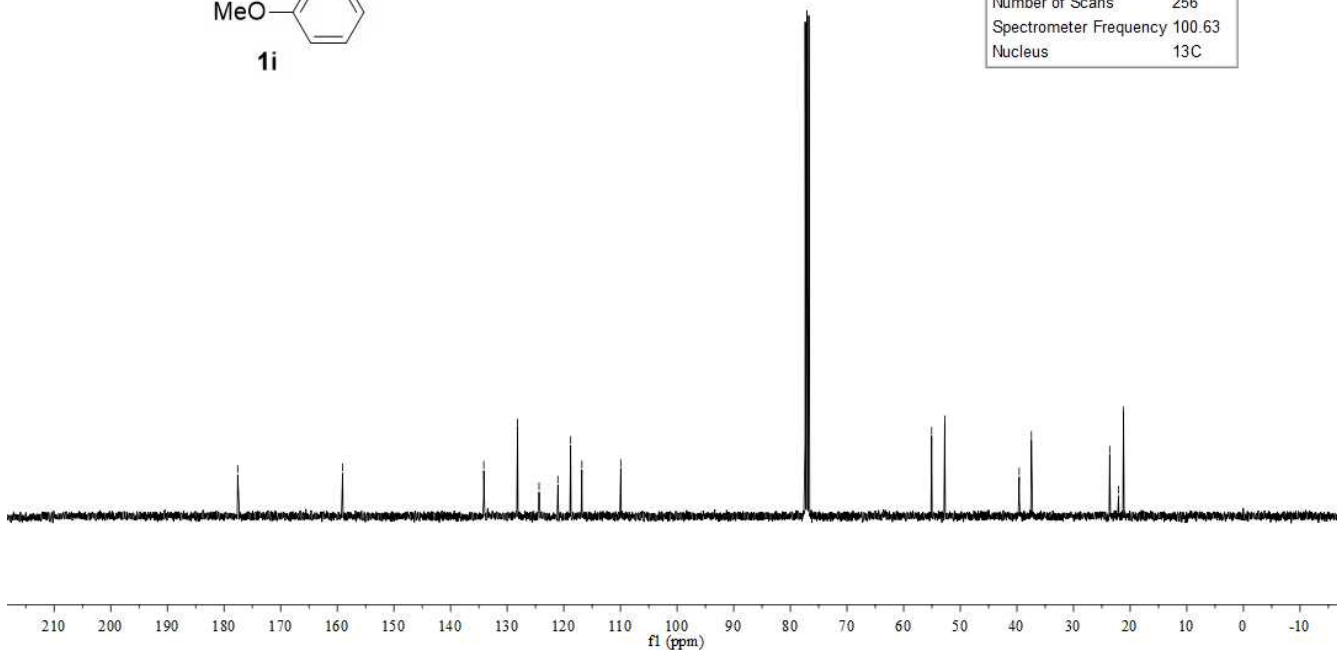

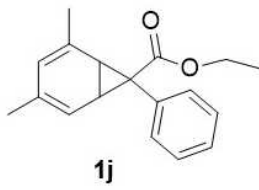

7.17  
7.16  
7.15  
7.14  
7.14  
7.01  
7.01  
7.00  
7.00  
6.99

5.73  
5.72  
5.38

4.12  
4.10  
4.09  
4.07

3.16  
3.15  
3.14  
3.12  
3.01  
2.99

2.06

1.49  
1.15  
1.13  
1.12

| Parameter              | Value    |
|------------------------|----------|
| Title                  | pdata/ 1 |
| Solvent                | CDCl3    |
| Temperature            | 294.9    |
| Number of Scans        | 16       |
| Spectrometer Frequency | 400.18   |
| Nucleus                | 1H       |

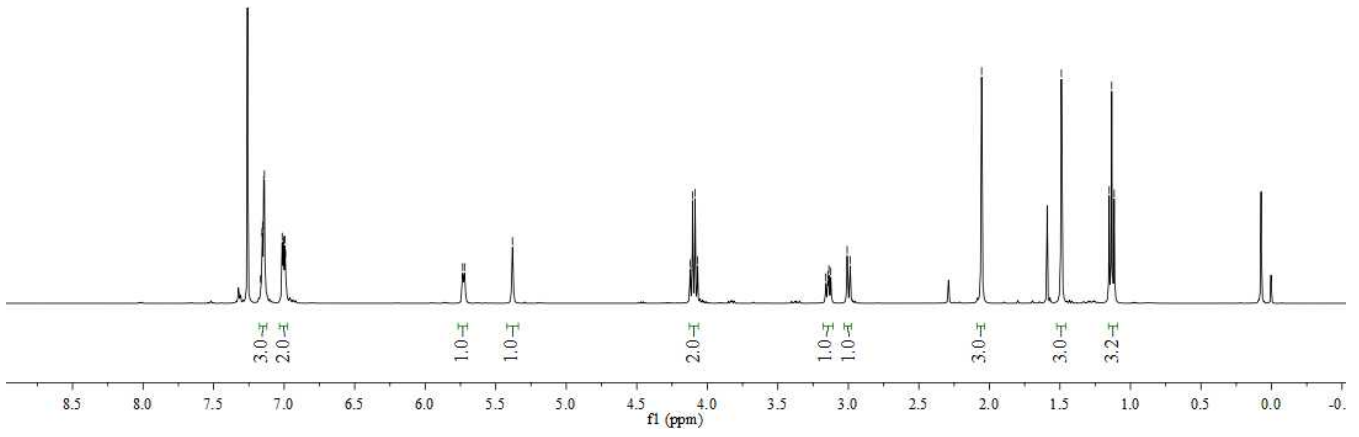

175.58

133.11  
132.72  
132.36  
131.41  
125.87  
125.45  
124.33  
116.23

60.30

41.45  
39.94

26.36  
22.84  
20.20  
13.18

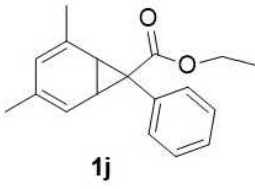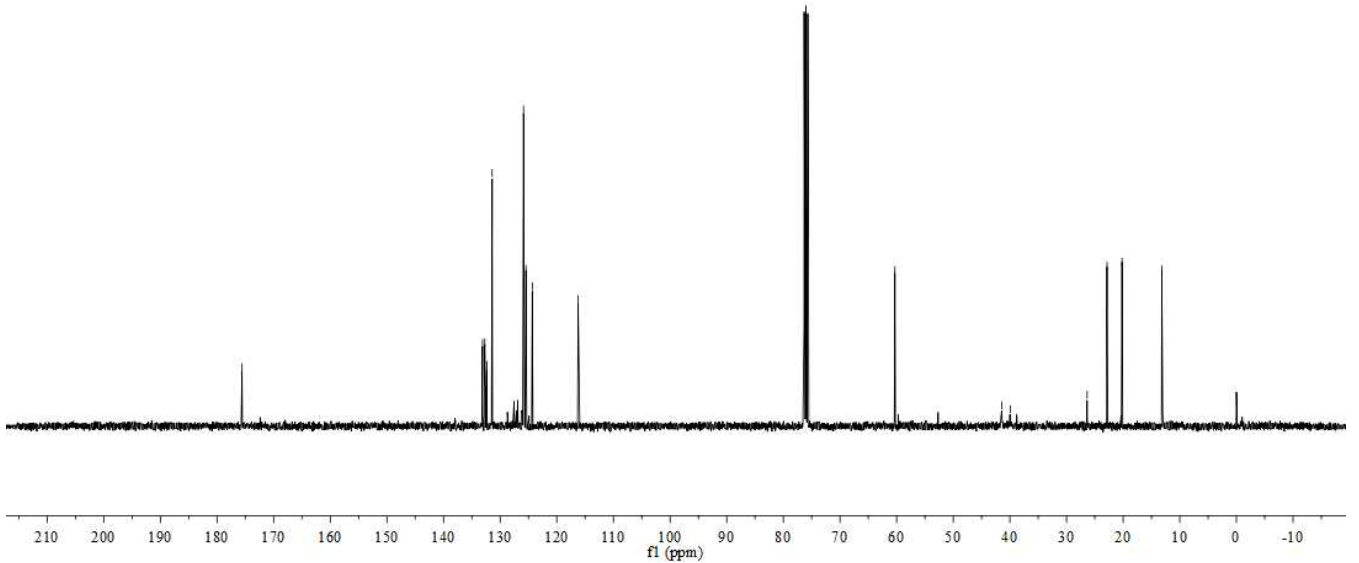



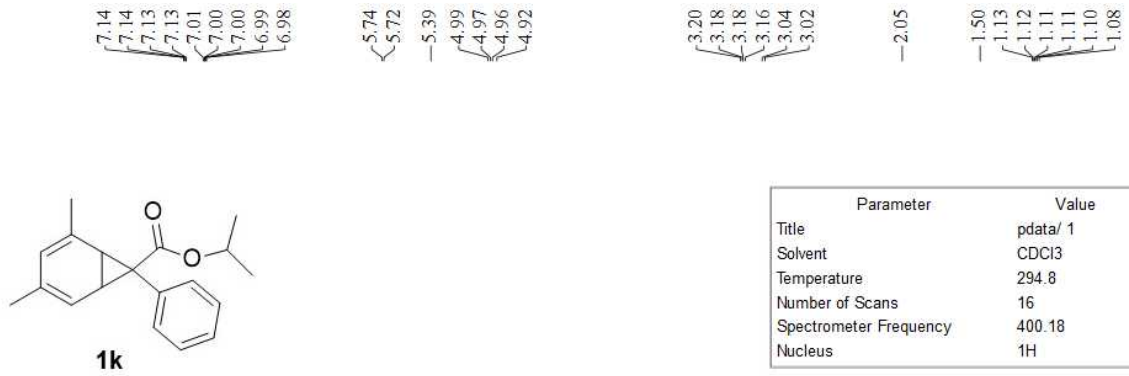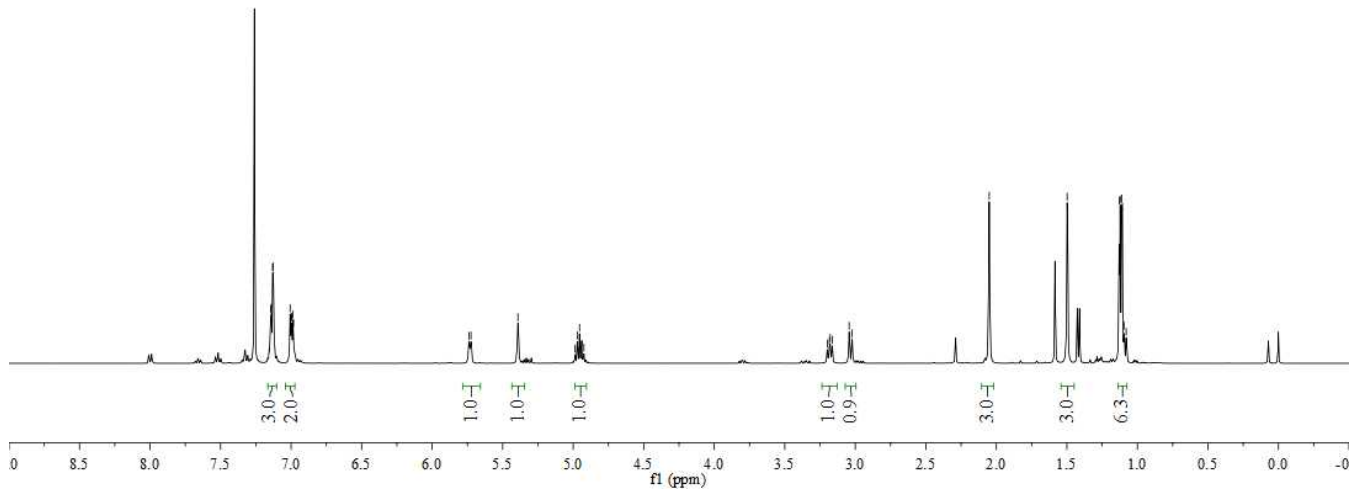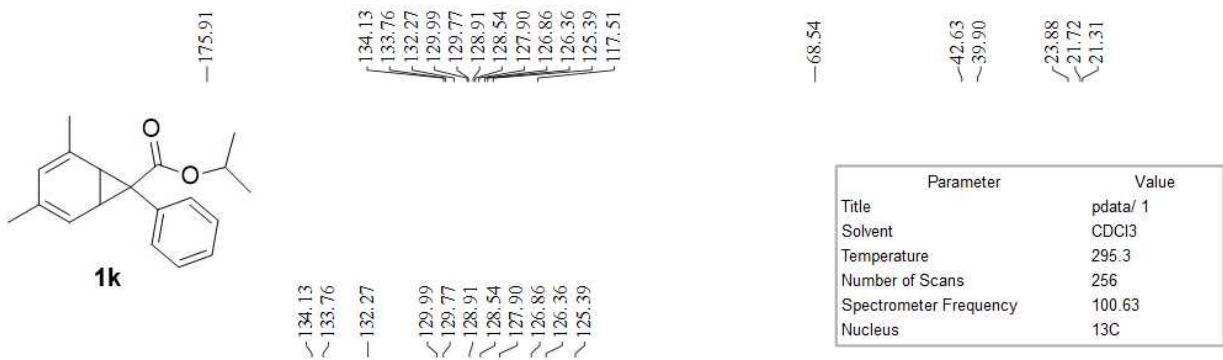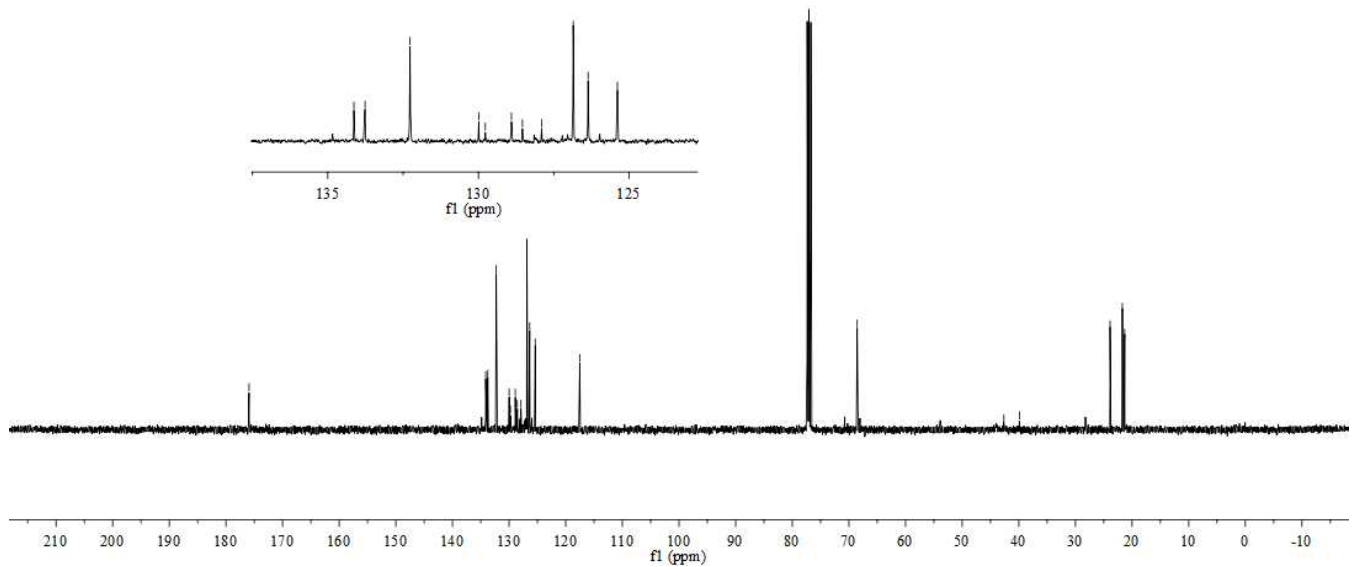

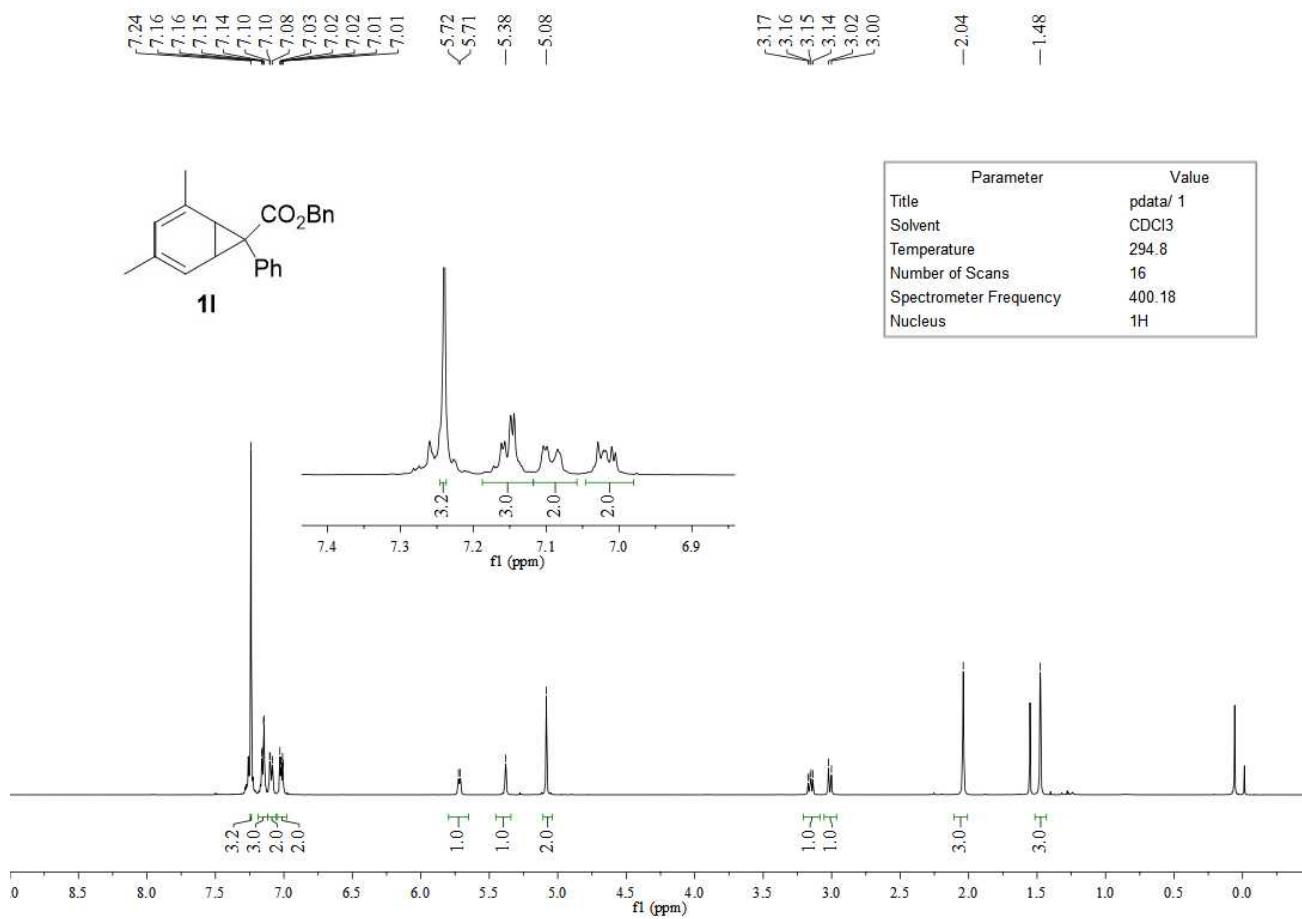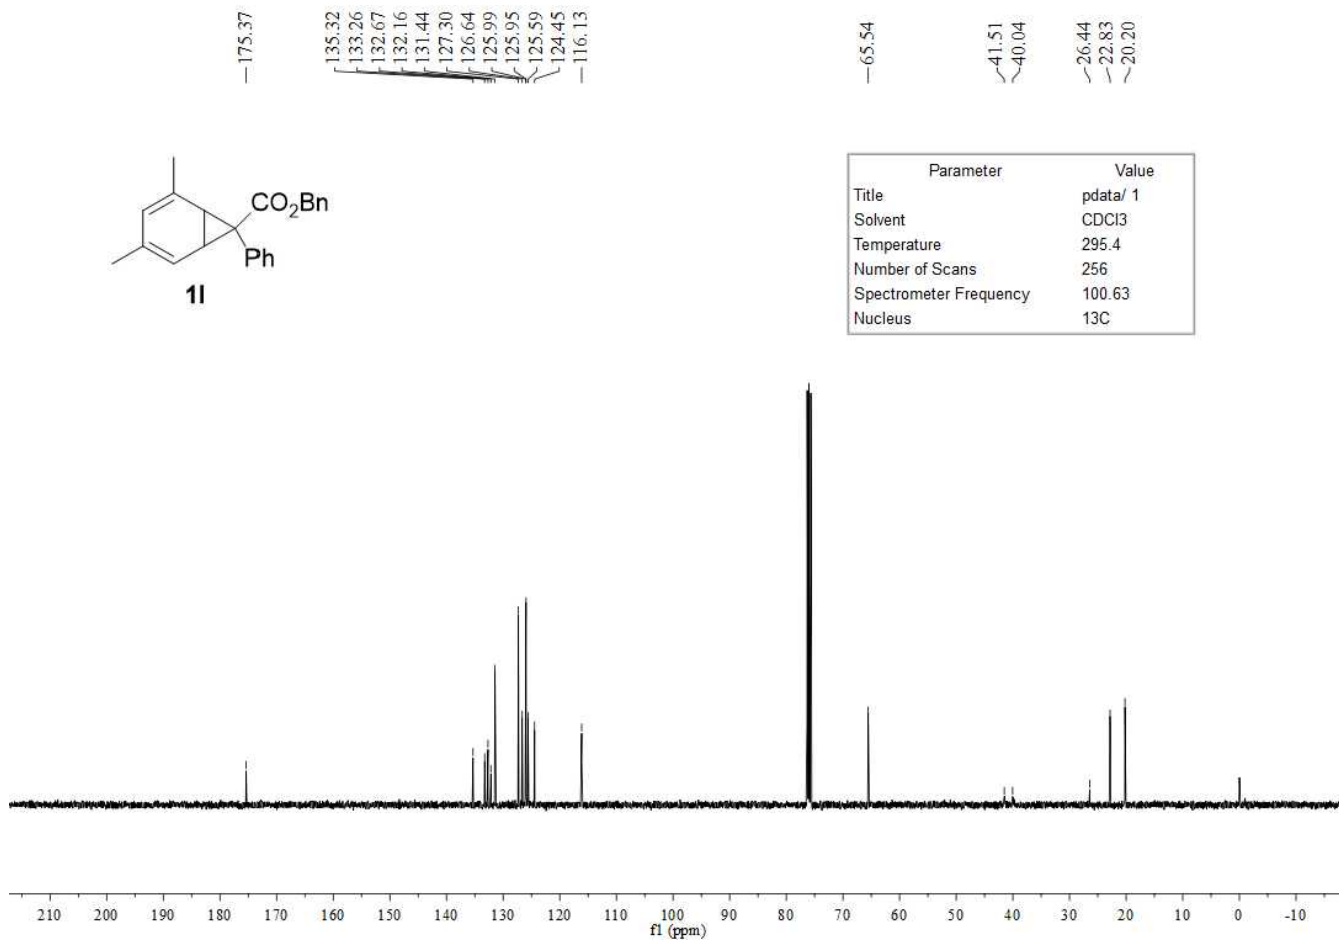

7.15  
7.13  
7.11  
7.11  
7.109  
6.88  
6.87  
6.85  
6.85  
6.83  
6.83  
6.79  
6.77  
6.73  
6.72  
6.72  
6.70  
6.70  
6.69  
5.72  
5.71  
5.41

3.63  
3.15  
3.13  
3.12  
3.11  
2.99  
2.97

2.05

1.51

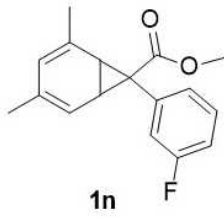

| Parameter              | Value    |
|------------------------|----------|
| Title                  | pdata/ 1 |
| Solvent                | CDCl3    |
| Temperature            | 294.6    |
| Number of Scans        | 16       |
| Spectrometer Frequency | 400.18   |
| Nucleus                | 1H       |

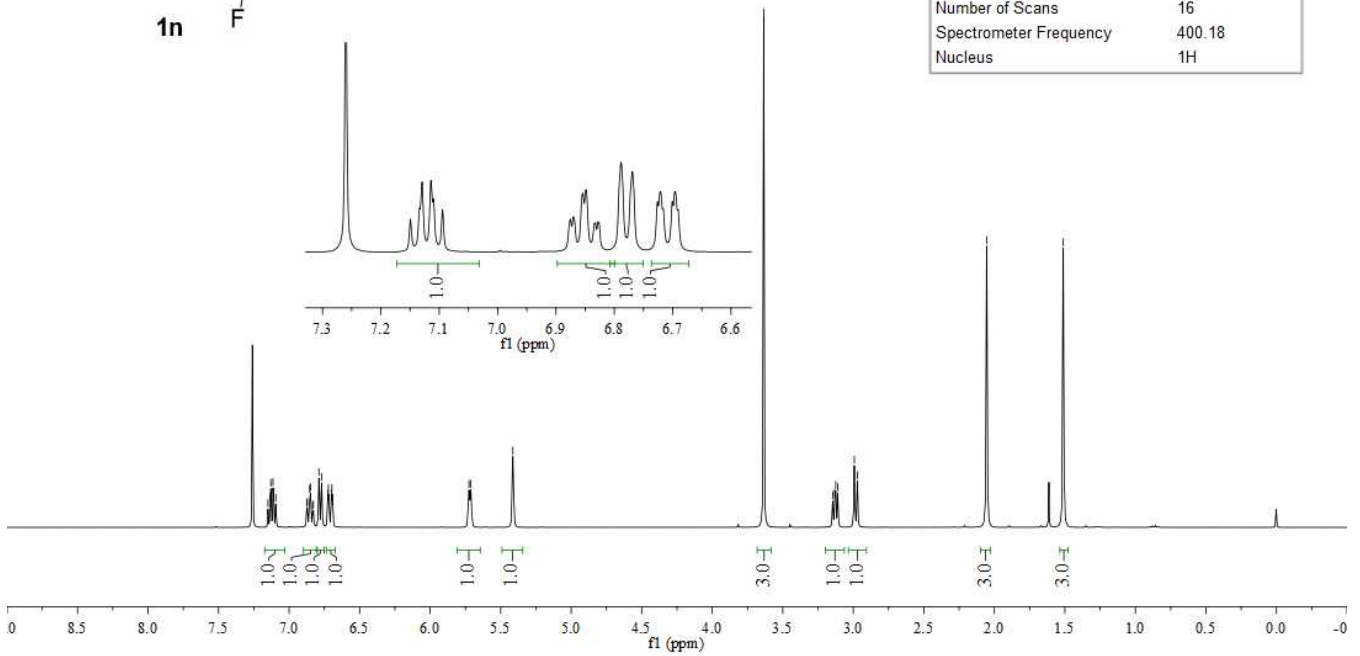

176.61

162.95

160.53

135.61

135.53

134.49

133.58

128.34

128.22

125.60

119.53

119.32

116.87

113.78

113.57

52.88

41.97

40.45

26.55

23.86

21.23

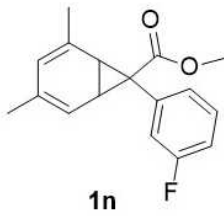

| Parameter              | Value    |
|------------------------|----------|
| Title                  | pdata/ 1 |
| Solvent                | CDCl3    |
| Temperature            | 295.3    |
| Number of Scans        | 256      |
| Spectrometer Frequency | 100.63   |
| Nucleus                | 13C      |

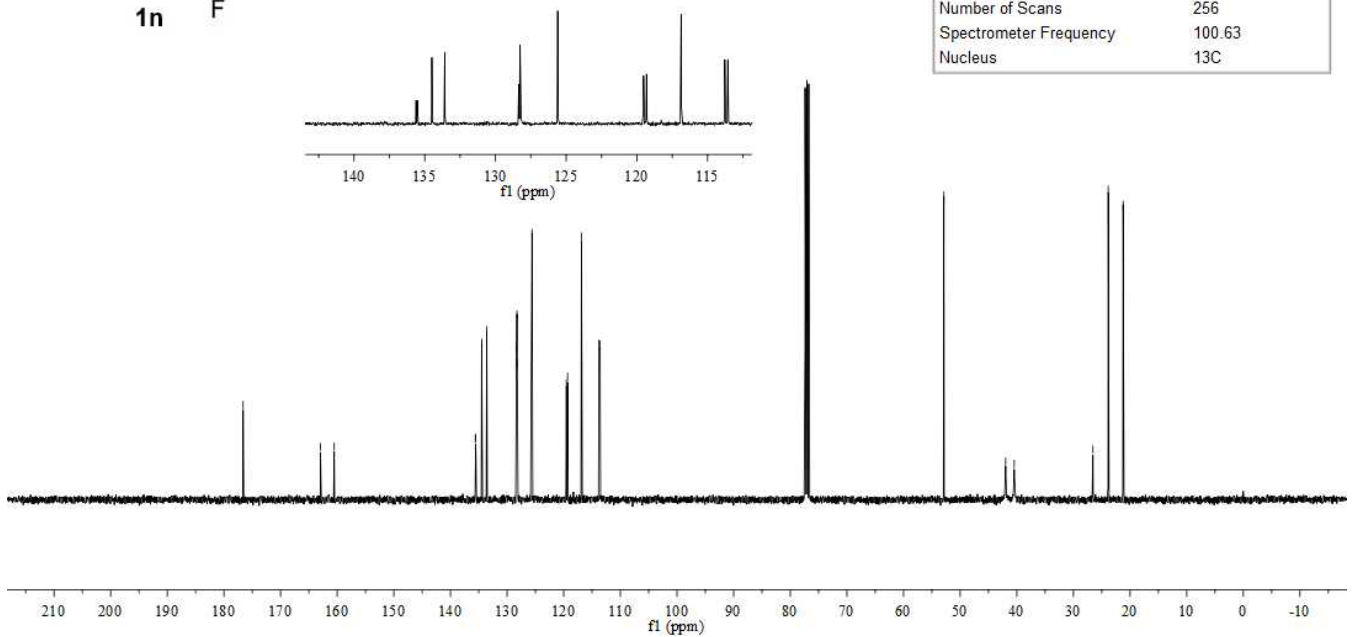

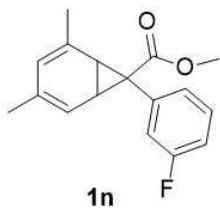

--114.81

| Parameter              | Value    |
|------------------------|----------|
| Title                  | pdata/ 1 |
| Solvent                | CDCl3    |
| Temperature            | 294.9    |
| Number of Scans        | 16       |
| Spectrometer Frequency | 376.55   |
| Nucleus                | 19F      |

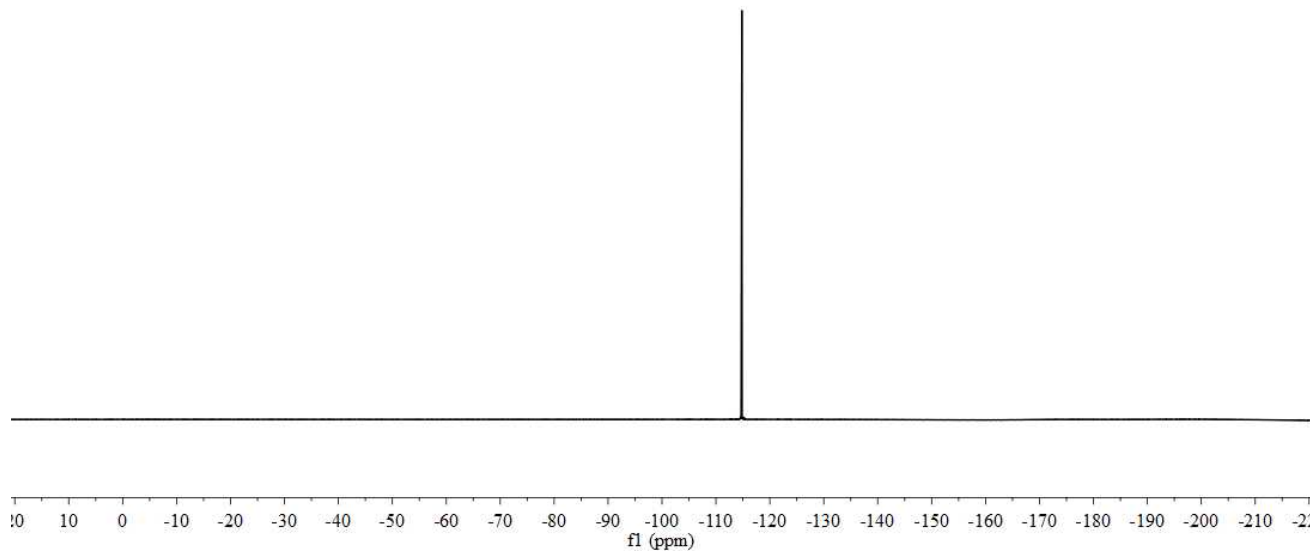

7.14  
7.14  
7.14  
7.13  
7.12  
7.12  
7.11  
7.09  
7.07  
6.98  
6.89  
6.88  
6.87  
5.74  
5.72  
5.41

3.64  
3.12  
3.11  
3.10  
3.09  
2.97  
2.95

2.05

1.51

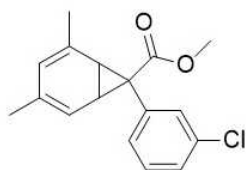

1o

| Parameter              | Value             |
|------------------------|-------------------|
| Title                  | pdata/ 1          |
| Solvent                | CDCl <sub>3</sub> |
| Temperature            | 294.6             |
| Number of Scans        | 16                |
| Spectrometer Frequency | 400.18            |
| Nucleus                | <sup>1</sup> H    |

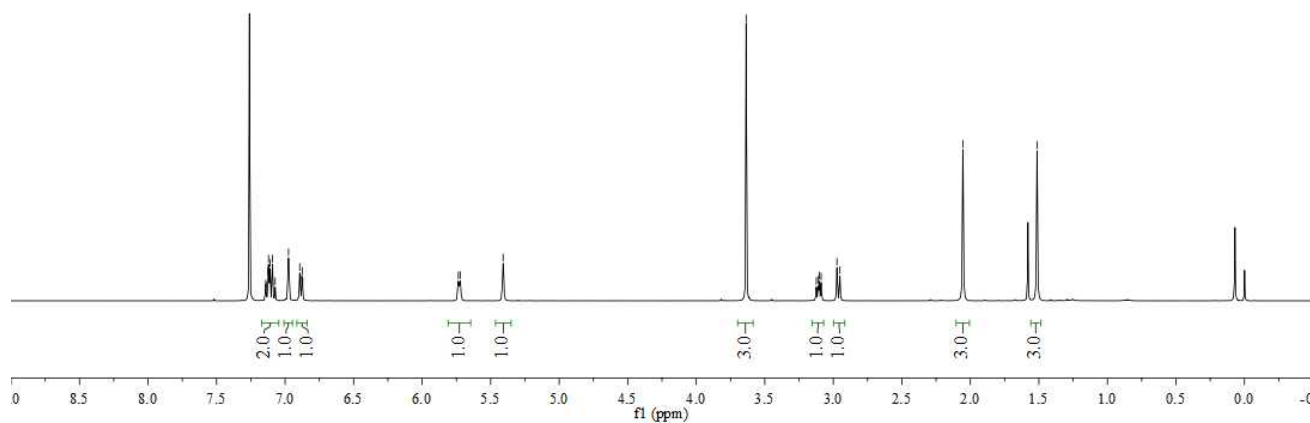

176.56  
135.06  
134.58  
133.62  
132.76  
132.37  
130.80  
128.26  
126.90  
125.62  
116.81  
52.91  
41.64  
40.00  
26.38  
23.84  
21.18

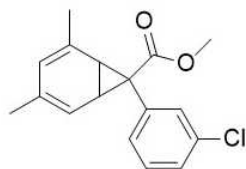

1o

| Parameter              | Value             |
|------------------------|-------------------|
| Title                  | pdata/ 1          |
| Solvent                | CDCl <sub>3</sub> |
| Temperature            | 295.2             |
| Number of Scans        | 256               |
| Spectrometer Frequency | 100.63            |
| Nucleus                | <sup>13</sup> C   |

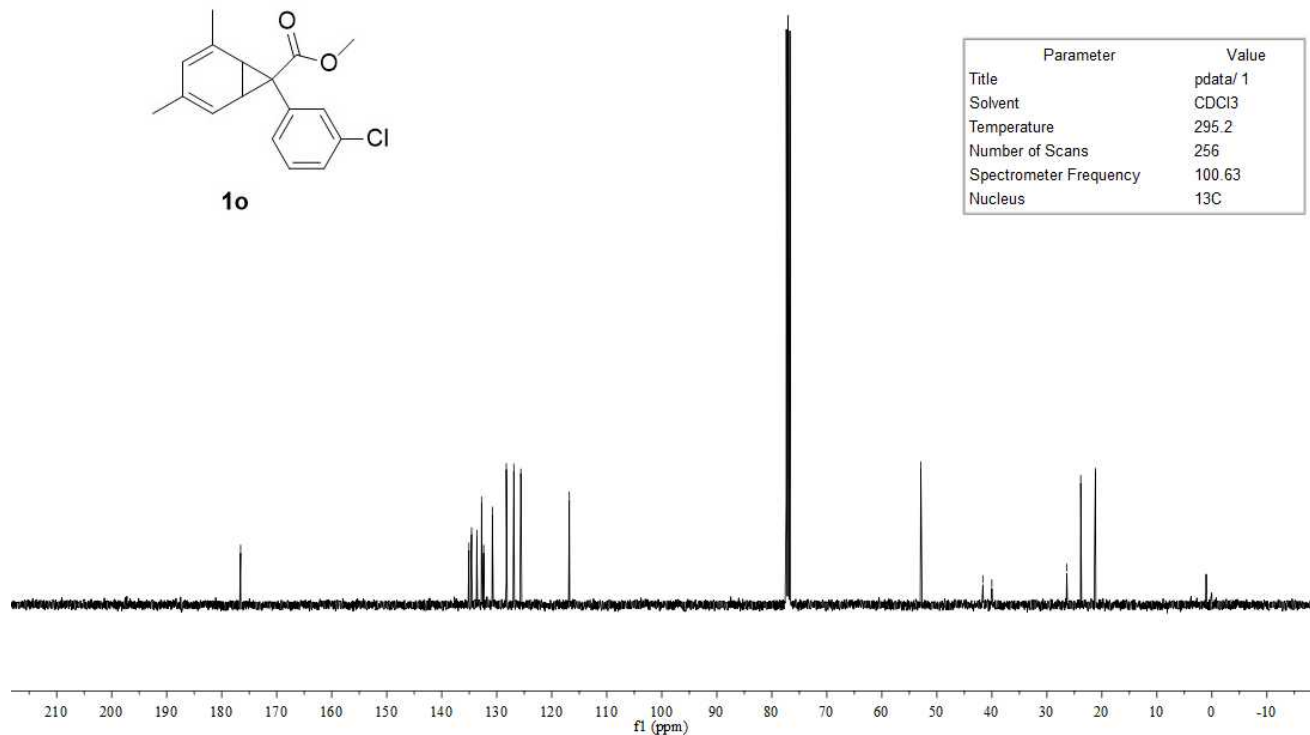

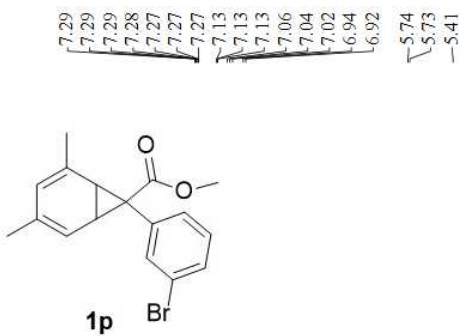

| Parameter              | Value    |
|------------------------|----------|
| Title                  | pdata/ 1 |
| Solvent                | CDCl3    |
| Temperature            | 294.4    |
| Number of Scans        | 16       |
| Spectrometer Frequency | 400.18   |
| Nucleus                | 1H       |

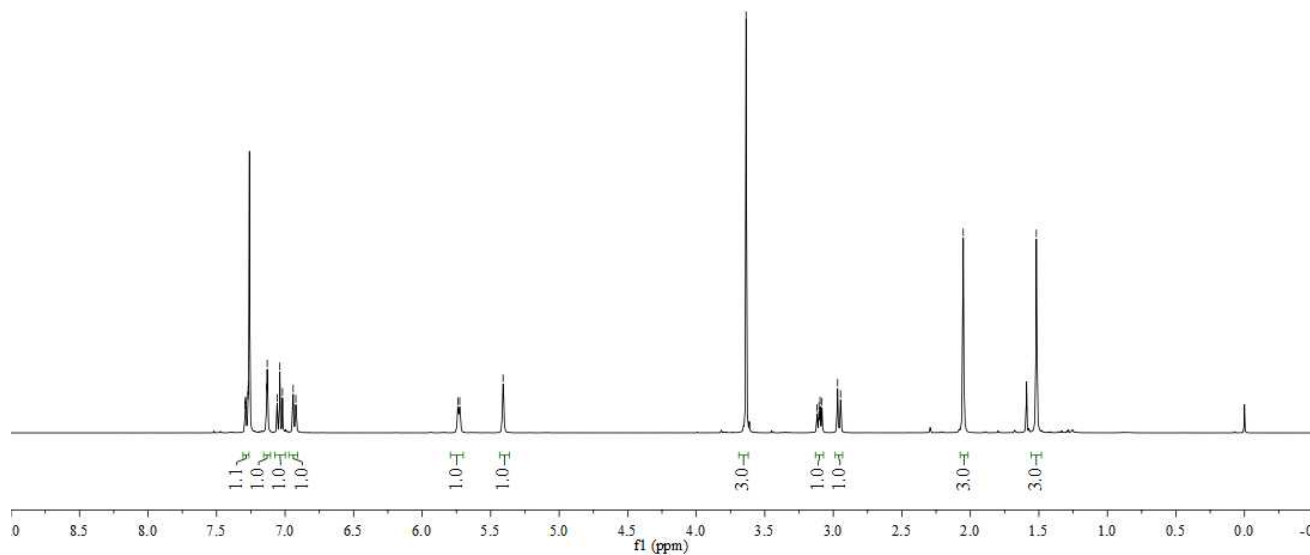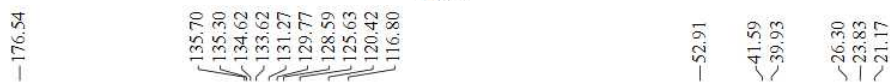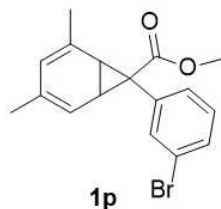

| Parameter              | Value    |
|------------------------|----------|
| Title                  | pdata/ 1 |
| Solvent                | CDCl3    |
| Temperature            | 295.1    |
| Number of Scans        | 256      |
| Spectrometer Frequency | 100.63   |
| Nucleus                | 13C      |

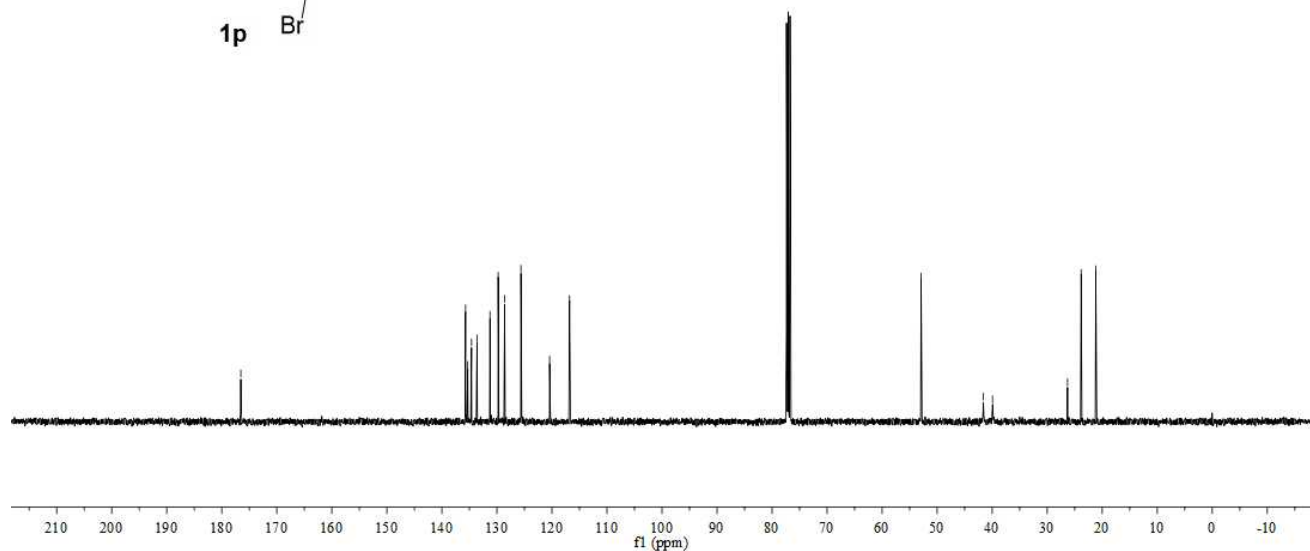

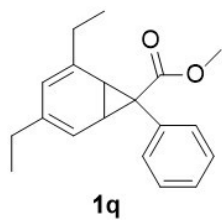

7.16  
7.15  
7.14  
7.13  
7.02  
7.01  
7.01  
7.00

5.73  
5.72  
5.41

3.64  
3.19  
3.17  
3.17  
3.15  
3.08  
3.06

2.46  
2.44  
2.42  
2.40  
2.38  
1.90  
1.89  
1.87  
1.85  
1.83  
1.82  
1.80  
1.78  
1.76  
1.19  
1.17  
1.15  
0.60  
0.58  
0.57

| Parameter              | Value                             |
|------------------------|-----------------------------------|
| Title                  | wsyuan-20221222-WSY-muc-et.1.1.1r |
| Solvent                | CDCl <sub>3</sub>                 |
| Temperature            | 297.5                             |
| Number of Scans        | 16                                |
| Spectrometer Frequency | 400.13                            |
| Nucleus                | <sup>1</sup> H                    |

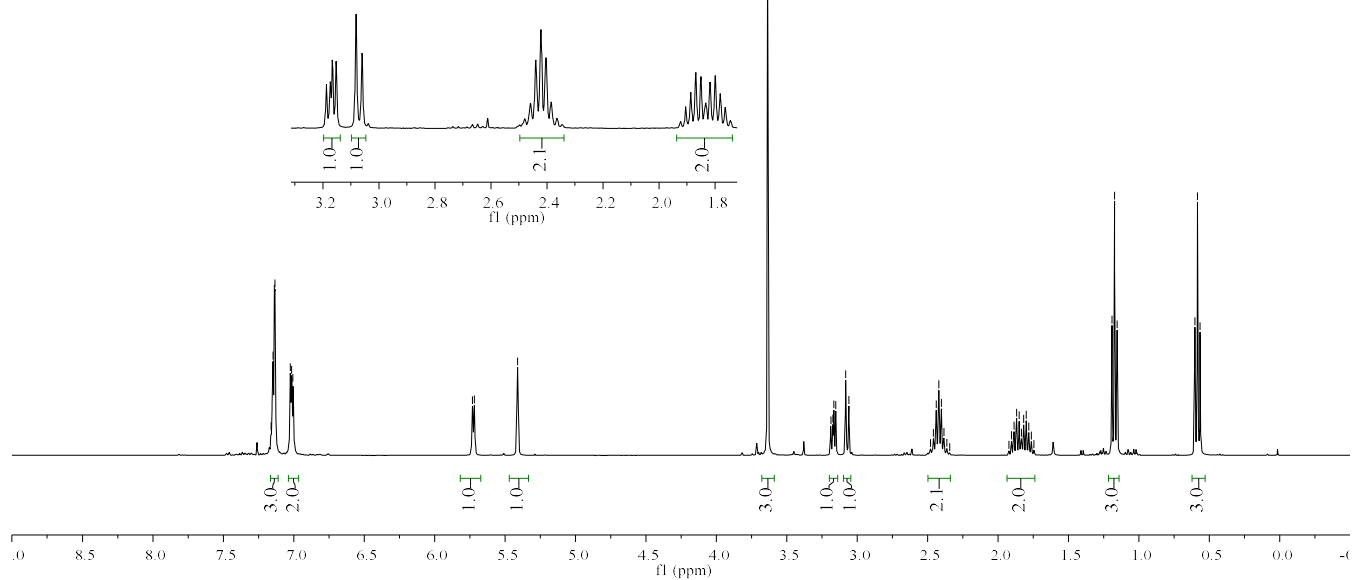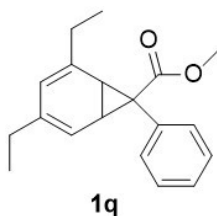

177.30

140.33  
139.19  
133.15  
132.84  
126.94  
126.56  
122.61  
122.58  
116.40  
116.38

52.82  
52.80  
41.89  
40.66  
30.36  
28.82  
27.01  
13.05  
12.05

| Parameter              | Value                             |
|------------------------|-----------------------------------|
| Title                  | wsyuan-20221222-WSY-muc-et.2.1.1r |
| Solvent                | CDCl <sub>3</sub>                 |
| Temperature            | 297.7                             |
| Number of Scans        | 256                               |
| Spectrometer Frequency | 100.61                            |
| Nucleus                | <sup>13</sup> C                   |

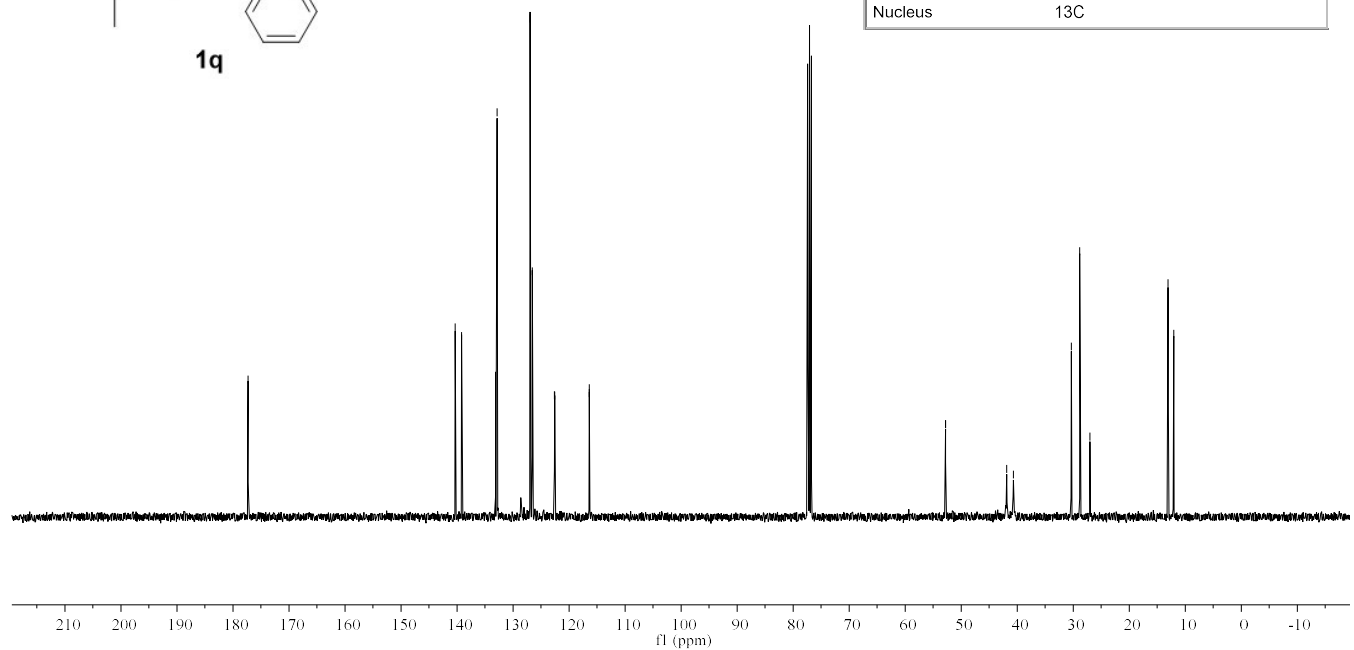

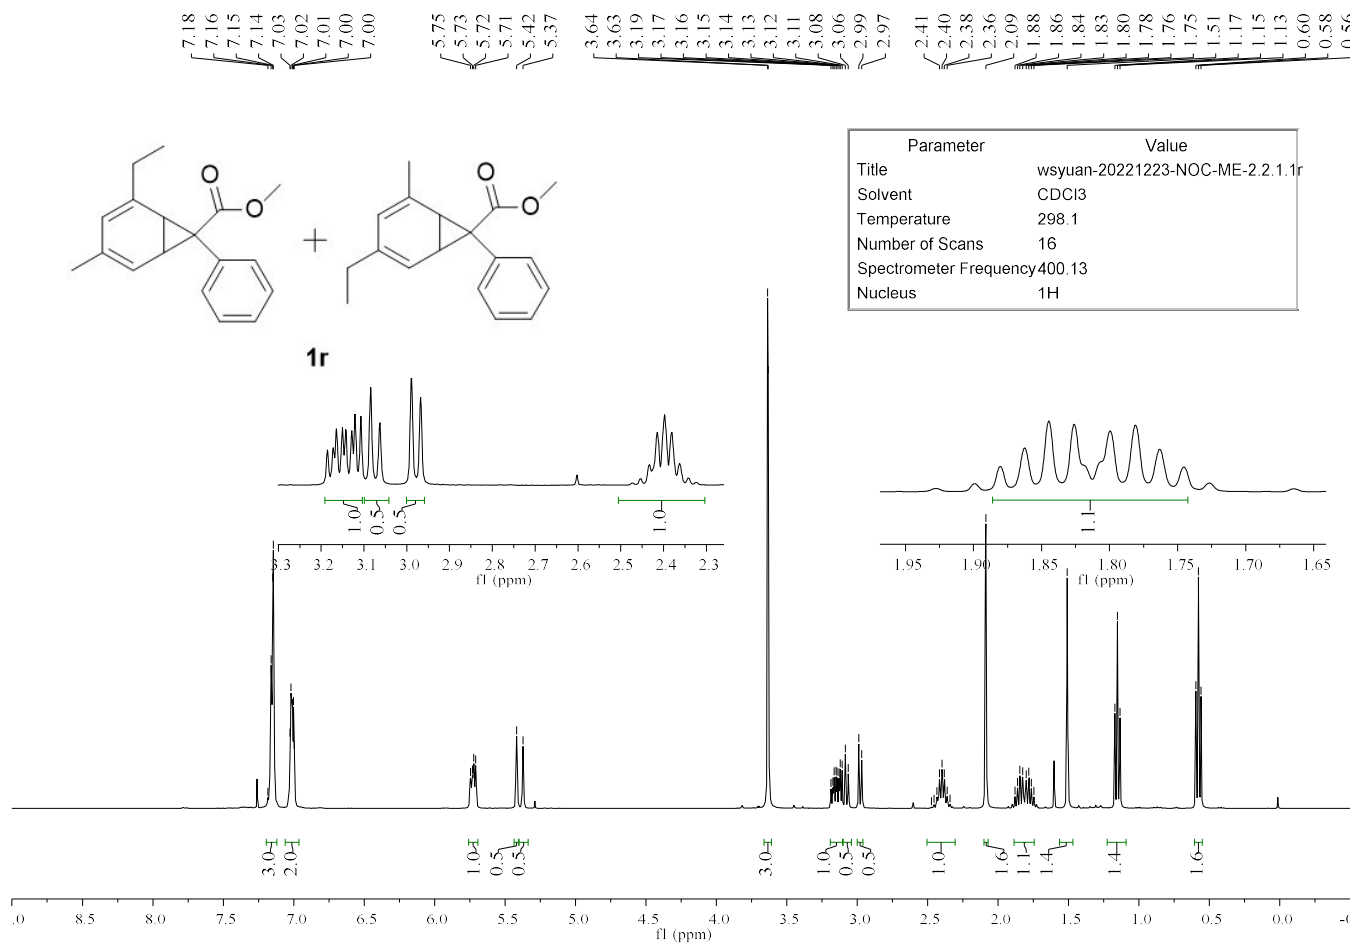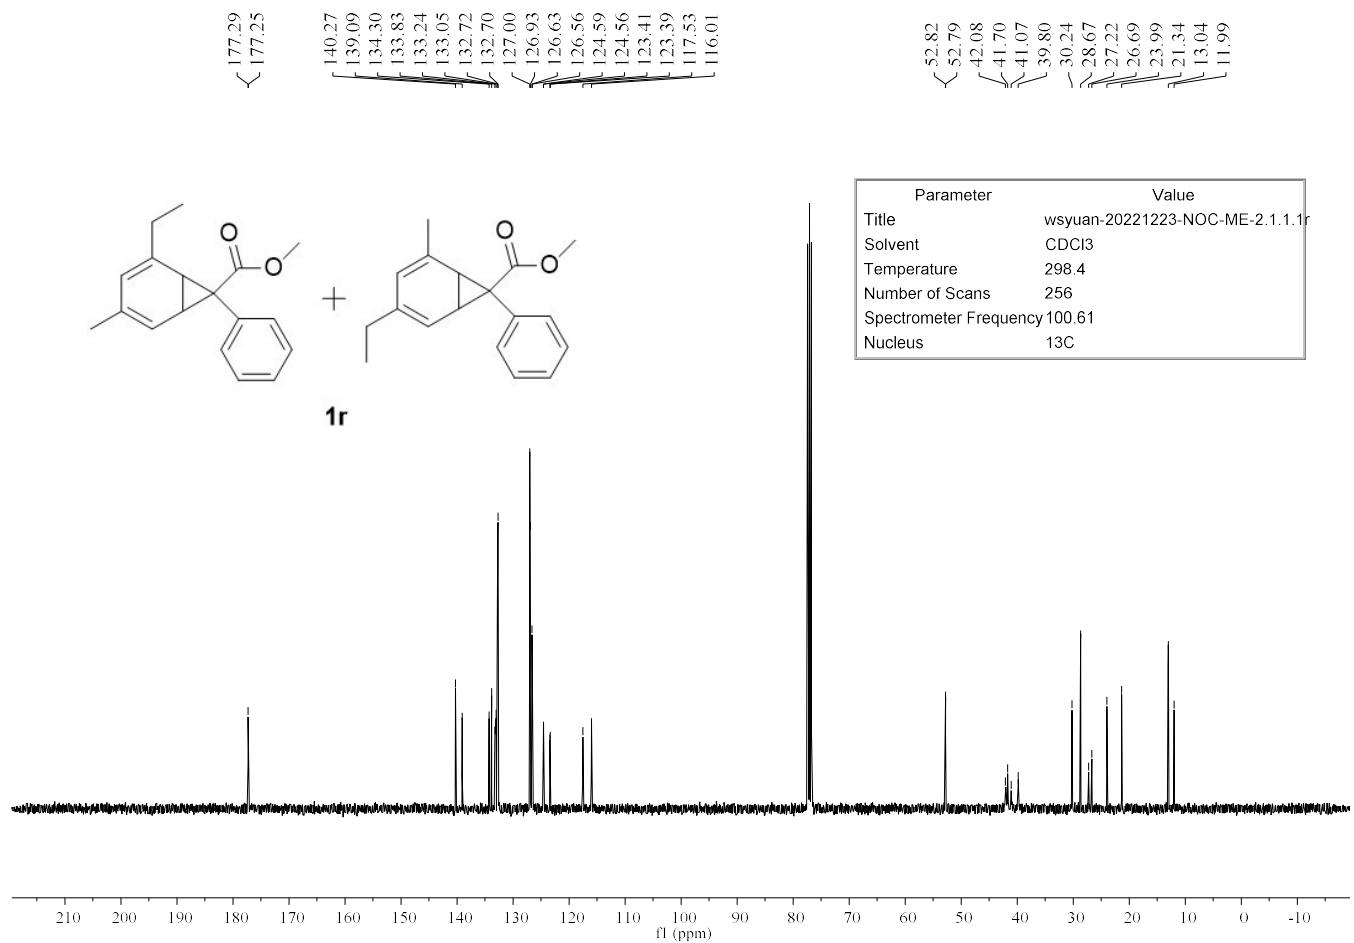



# 3aa

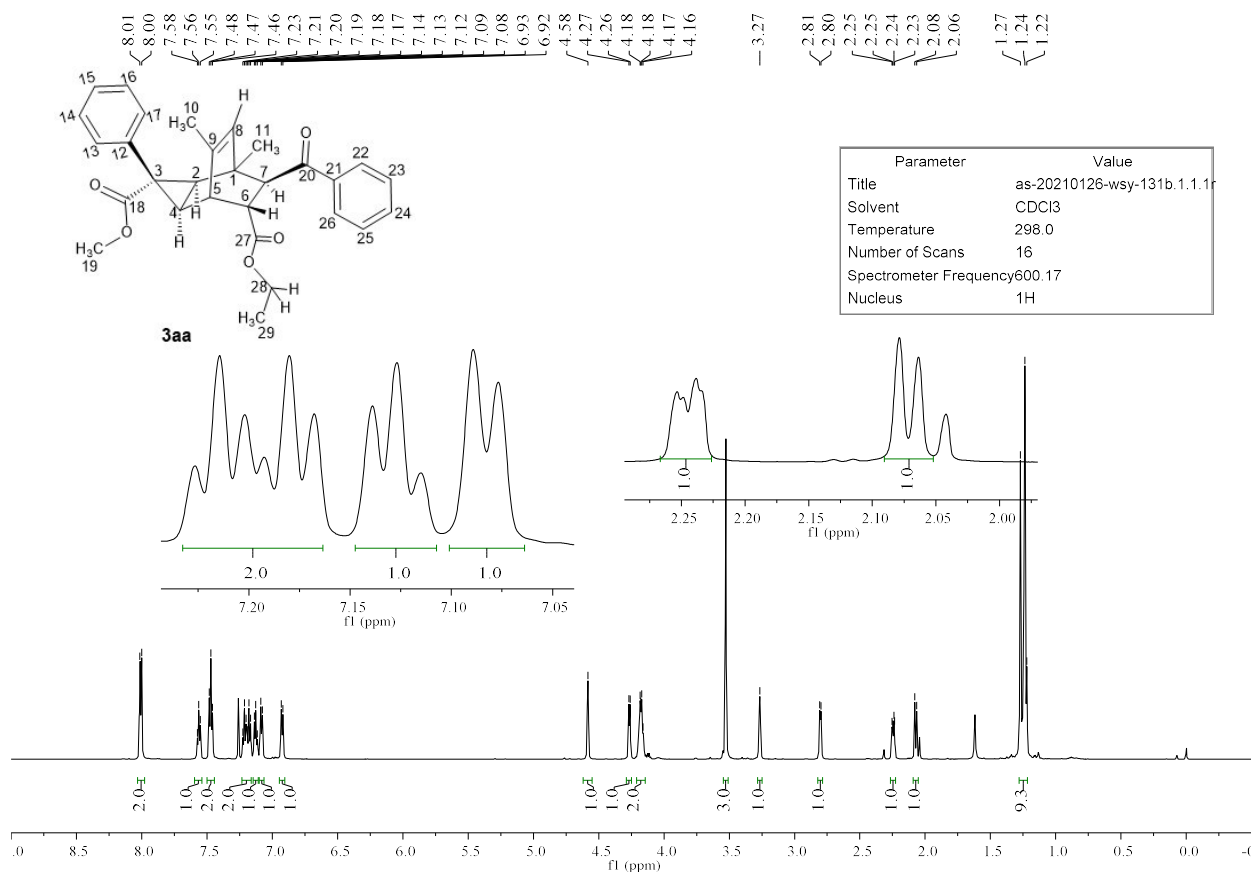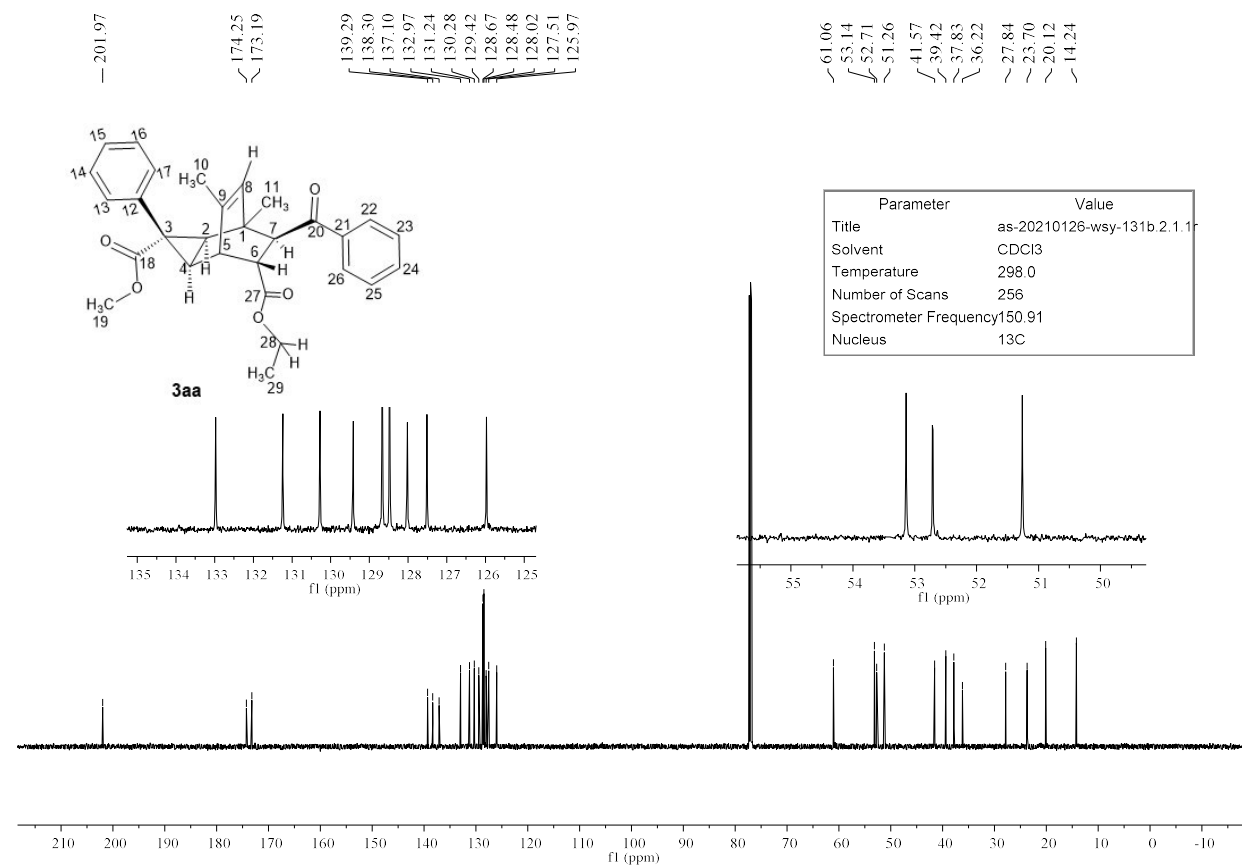

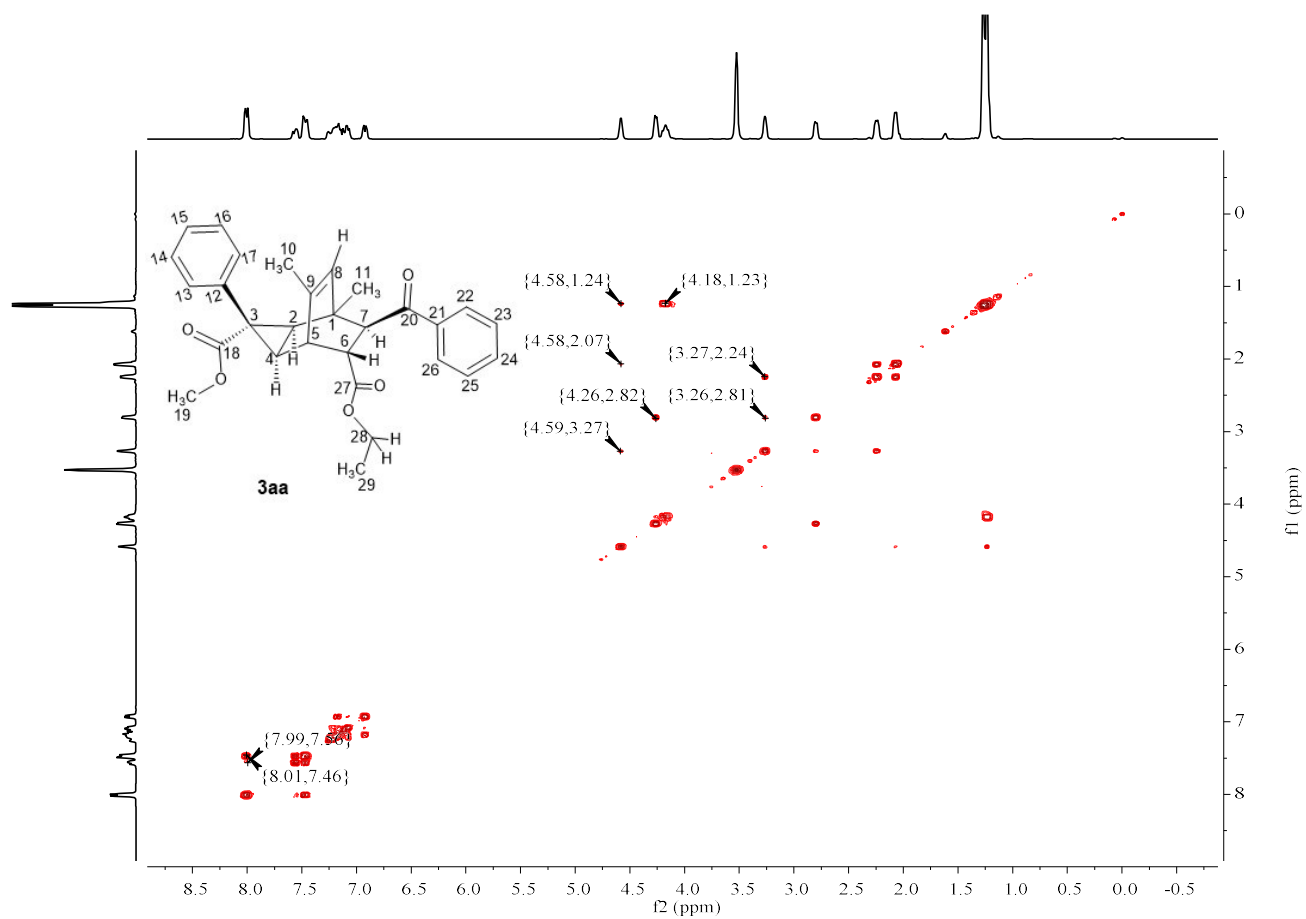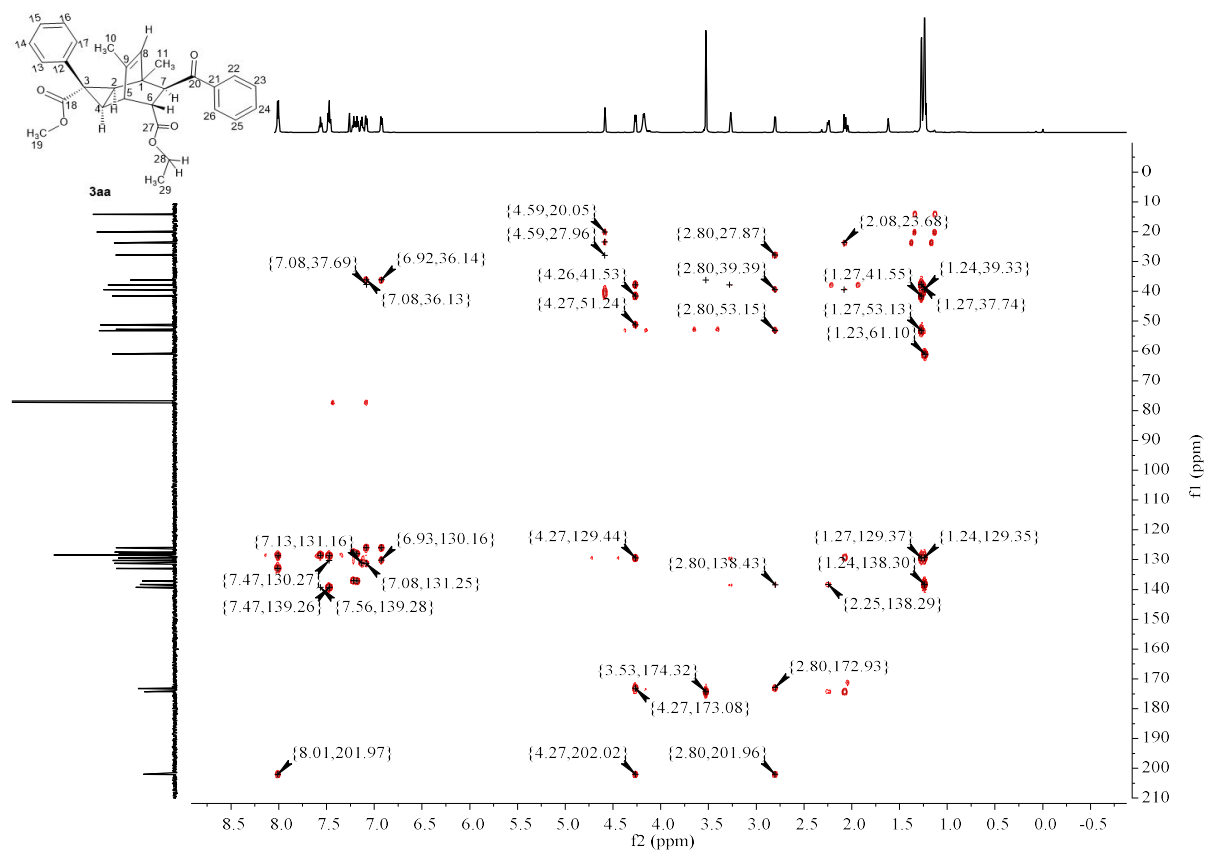

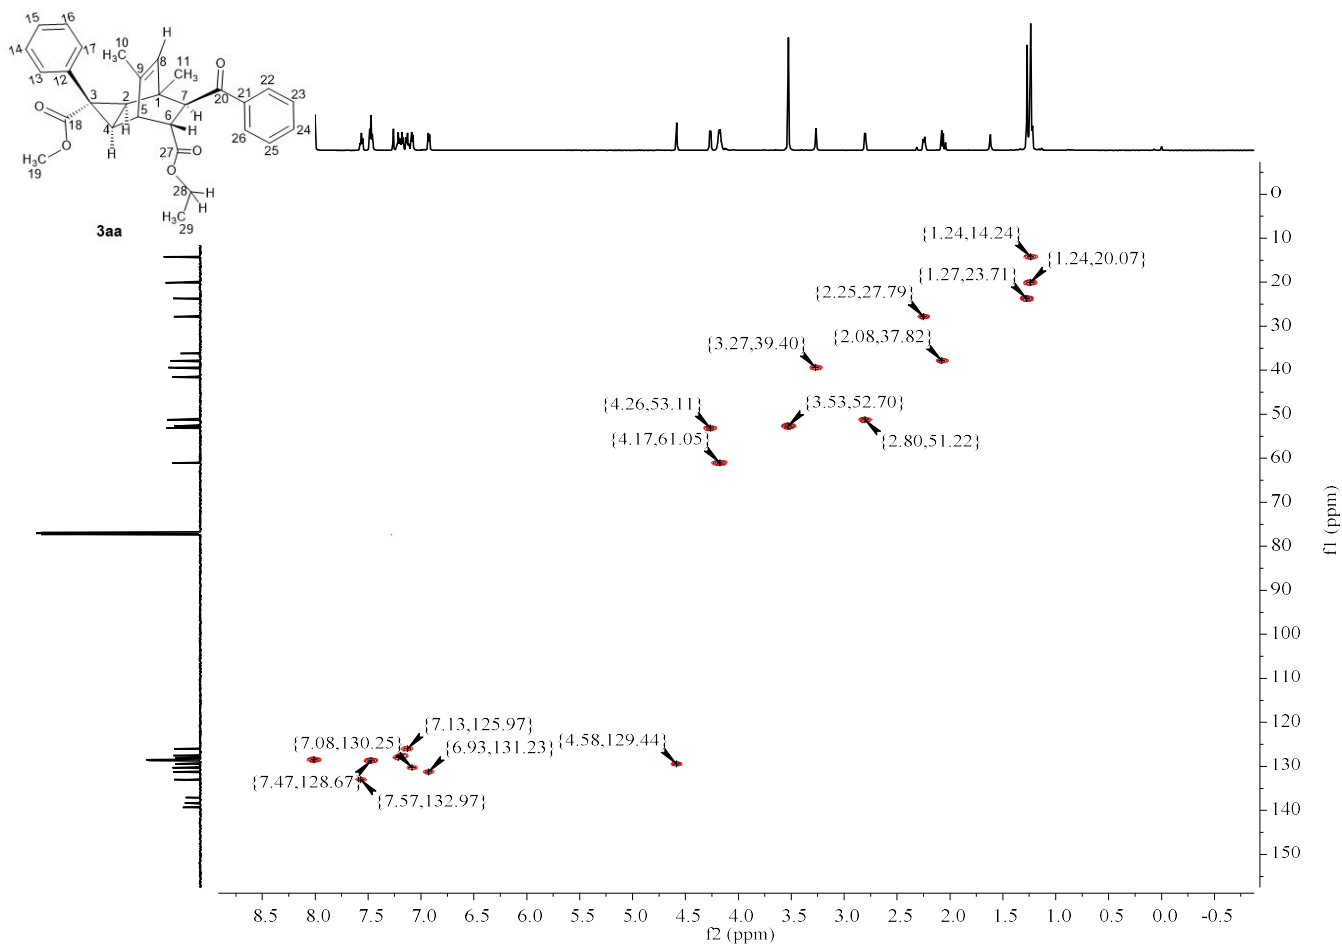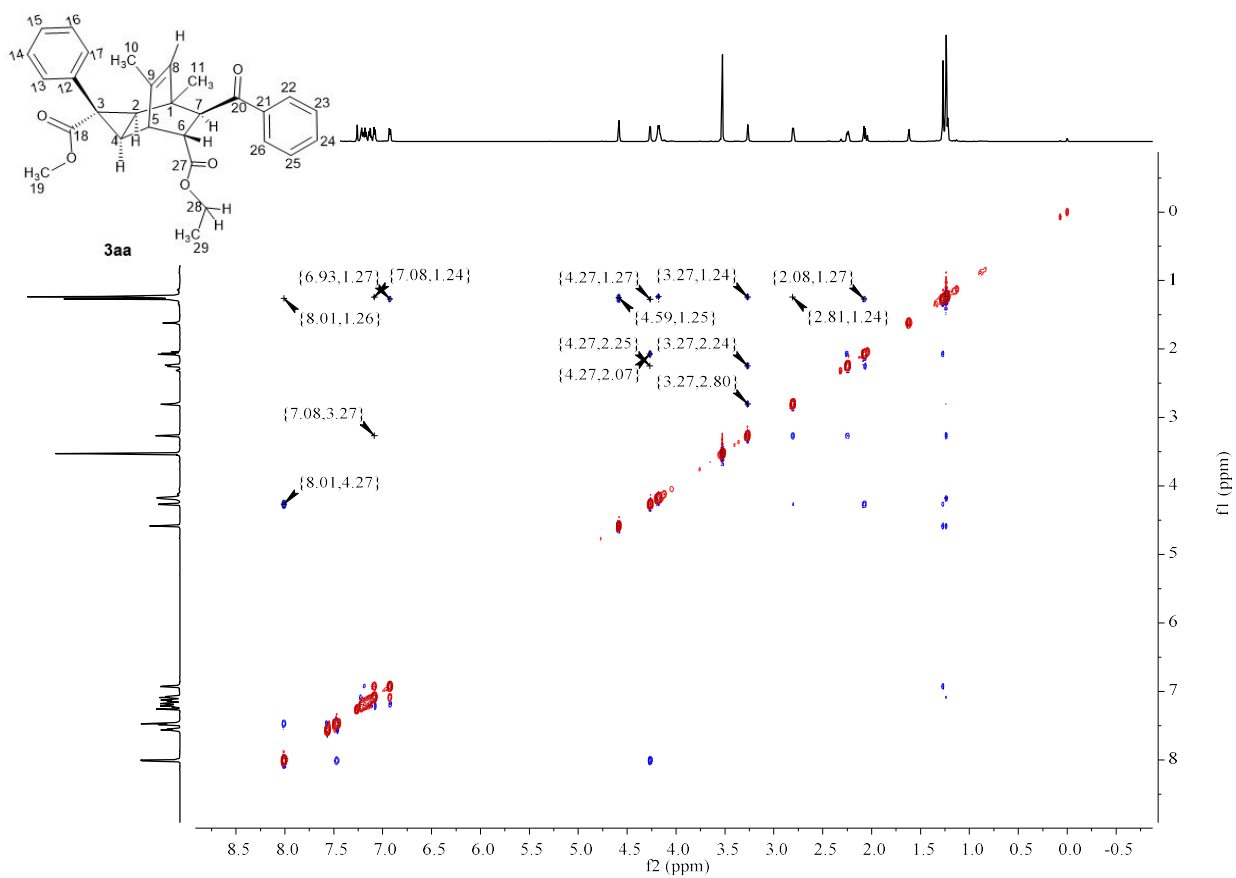

7.79  
7.79  
7.78  
7.78  
7.76  
7.76  
7.50  
7.50  
7.50  
7.49  
7.48  
7.47  
7.23  
7.22  
7.21  
7.21  
7.20  
7.20  
7.20  
7.19  
7.18  
7.16  
7.16  
7.14  
7.14  
7.12  
7.11  
7.08  
7.07  
6.93  
6.92  
4.56  
4.20  
4.19  
4.17  
4.17  
4.16  
4.15  
4.15  
4.14  
3.51  
3.26  
3.26  
3.25  
2.89  
2.88  
2.88  
2.87  
2.28  
2.27  
2.26  
2.26  
2.06  
2.04  
1.34  
1.24  
1.23  
1.21

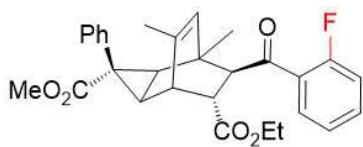

**3ab**

| Parameter              | Value                      |
|------------------------|----------------------------|
| Title                  | as-20211201-WSY-388.1.1.1f |
| Solvent                | CDCl3                      |
| Temperature            | 297.1                      |
| Number of Scans        | 16                         |
| Spectrometer Frequency | 600.17                     |
| Nucleus                | 1H                         |

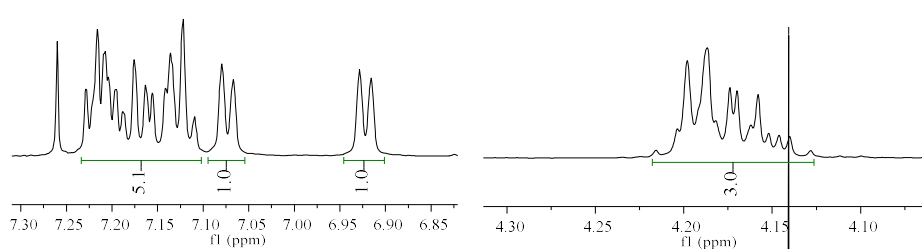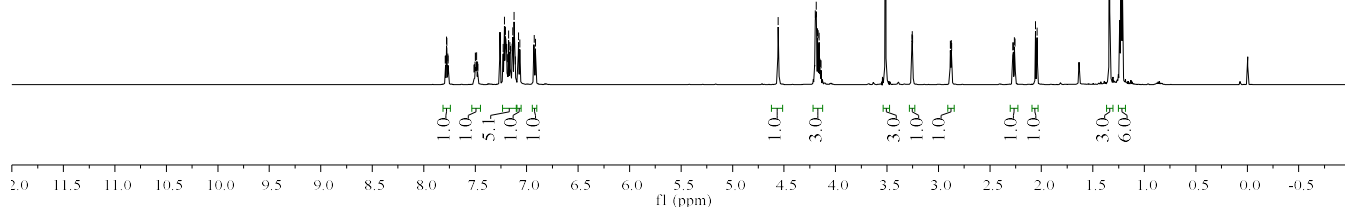

200.23  
200.21  
174.16  
173.09  
161.70  
160.01  
138.77  
137.11  
134.05  
133.99  
131.23  
130.56  
130.28  
129.09  
128.73  
128.65  
128.02  
127.49  
125.96  
124.37  
124.35  
117.01  
116.86  
61.00  
57.40  
57.36  
52.68  
50.66  
42.03  
39.14  
37.88  
36.36  
27.74  
23.17  
20.12  
14.14

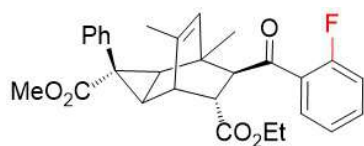

**3ab**

| Parameter              | Value                      |
|------------------------|----------------------------|
| Title                  | as-20211201-WSY-388.2.1.1f |
| Solvent                | CDCl3                      |
| Temperature            | 298.0                      |
| Number of Scans        | 256                        |
| Spectrometer Frequency | 150.91                     |
| Nucleus                | 13C                        |

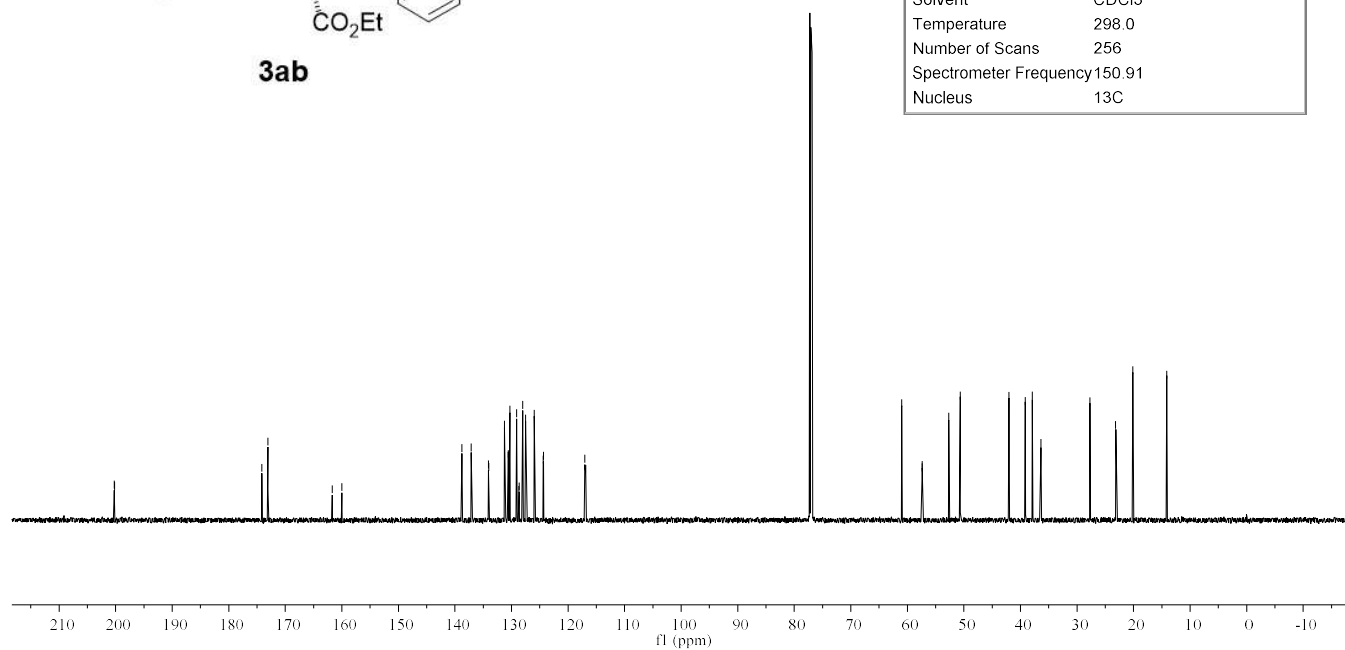

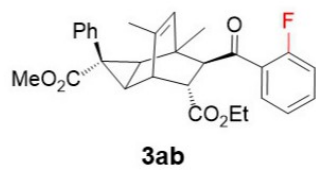

| Parameter              | Value                      |
|------------------------|----------------------------|
| Title                  | as-20211201-WSY-388.3.1.1r |
| Solvent                | CDCl3                      |
| Temperature            | 297.4                      |
| Number of Scans        | 16                         |
| Spectrometer Frequency | 564.72                     |
| Nucleus                | 19F                        |

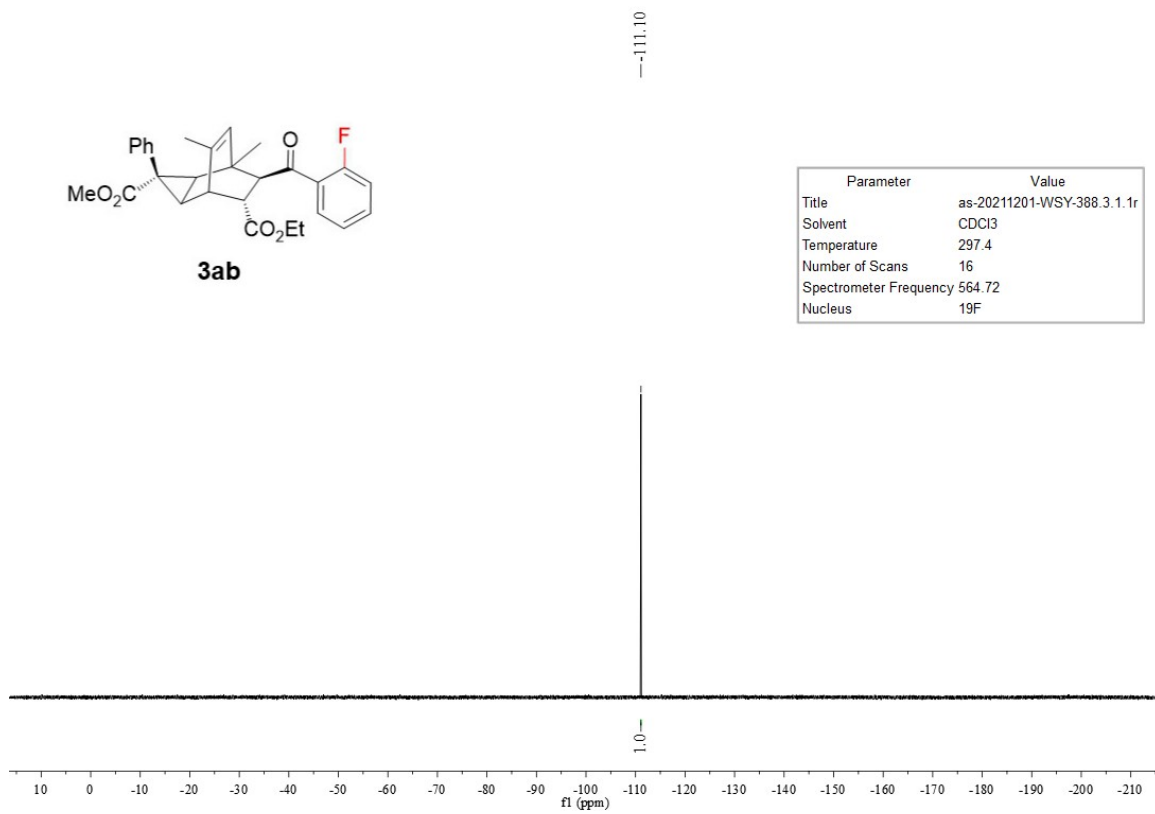

7.83  
7.81  
7.67  
7.65  
7.49  
7.47  
7.47  
7.45  
7.45  
7.43  
7.29  
7.28  
7.27  
7.26  
7.26  
7.25  
7.24  
7.24  
7.23  
7.22  
7.21  
7.20  
7.20  
7.19  
7.17  
7.15  
7.13  
7.11  
7.09  
7.07  
4.57  
4.21  
4.20  
4.19  
4.18  
4.18  
4.17  
4.16  
4.16  
3.53  
3.28  
3.27  
3.27  
2.79  
2.78  
2.77  
2.77  
2.25  
2.24  
2.22  
2.22  
2.07  
2.05  
1.27  
1.26  
1.25  
1.24  
1.23

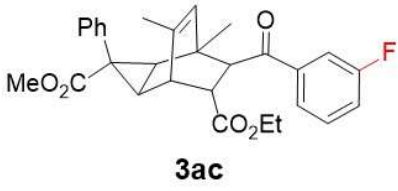

| Parameter              | Value                      |
|------------------------|----------------------------|
| Title                  | as-20211210-wsy-395.7.1.1r |
| Solvent                | CDCl3                      |
| Temperature            | 292.7                      |
| Number of Scans        | 16                         |
| Spectrometer Frequency | 400.18                     |
| Nucleus                | 1H                         |

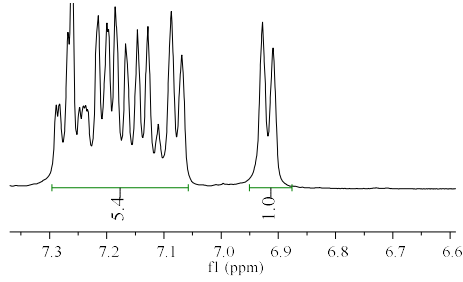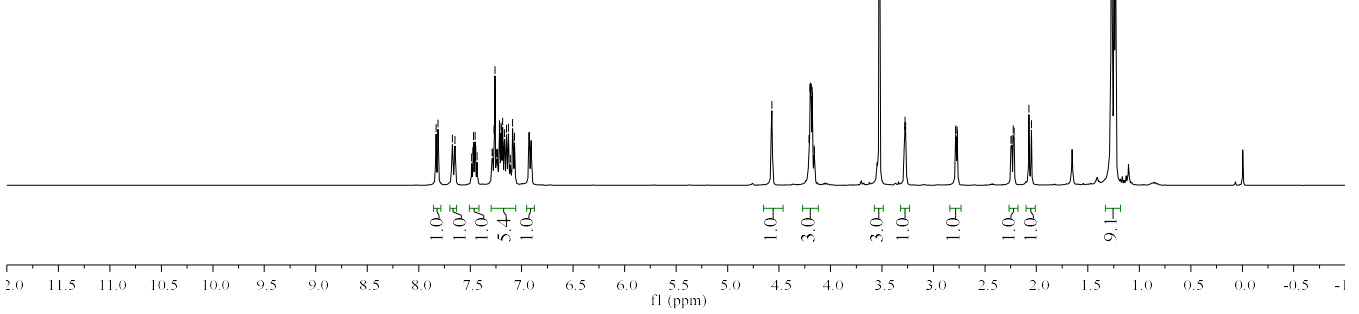

200.86  
200.84  
174.18  
173.03  
164.13  
161.66  
141.37  
141.31  
138.53  
136.96  
131.19  
130.36  
130.29  
130.24  
129.20  
128.04  
127.54  
126.01  
124.29  
124.26  
120.11  
119.90  
115.21  
114.99  
61.18  
53.43  
52.75  
51.33  
41.66  
39.33  
37.70  
36.18  
27.75  
23.64  
20.12  
14.22

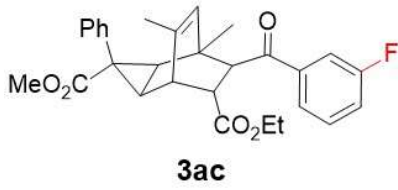

| Parameter              | Value                      |
|------------------------|----------------------------|
| Title                  | as-20211210-wsy-395.8.1.1r |
| Solvent                | CDCl3                      |
| Temperature            | 293.3                      |
| Number of Scans        | 256                        |
| Spectrometer Frequency | 100.63                     |
| Nucleus                | 13C                        |

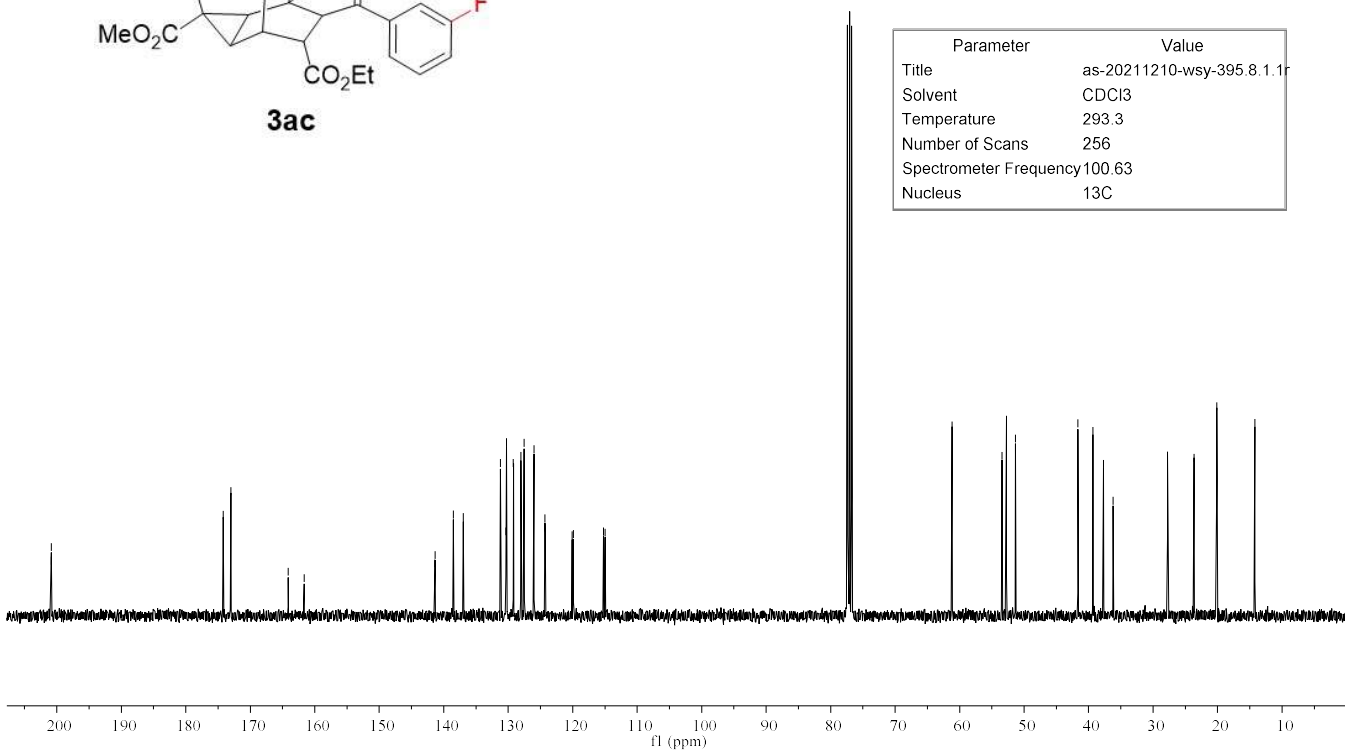

-111.72

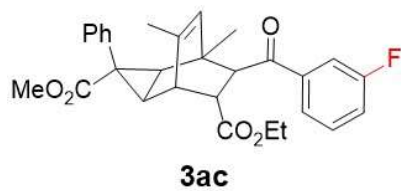

| Parameter              | Value                      |
|------------------------|----------------------------|
| Title                  | as-20211210-wsy-395.9.1.1f |
| Solvent                | CDCl <sub>3</sub>          |
| Temperature            | 293.0                      |
| Number of Scans        | 16                         |
| Spectrometer Frequency | 376.55                     |
| Nucleus                | <sup>19</sup> F            |

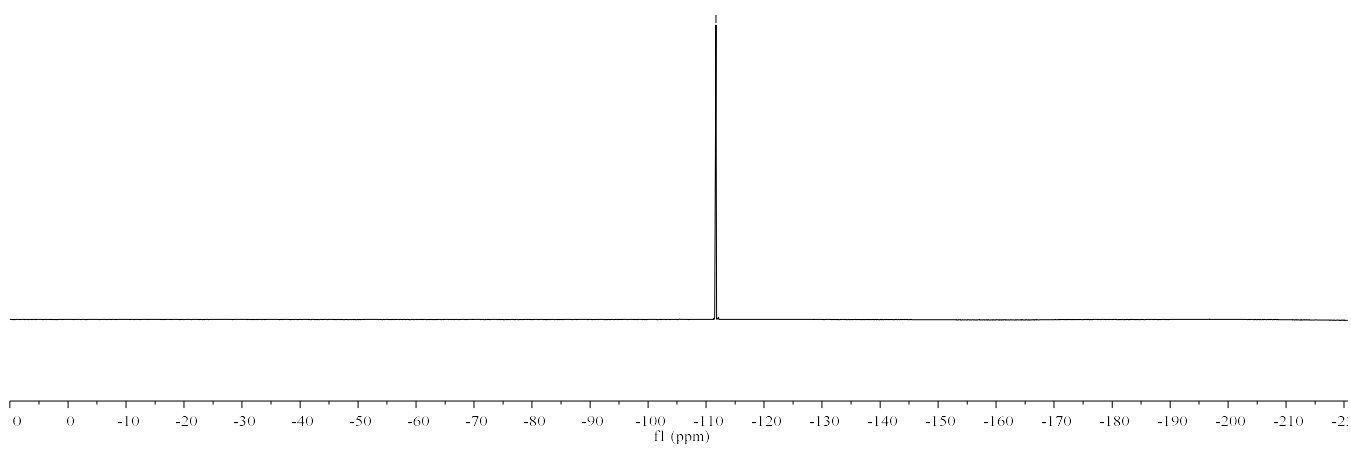

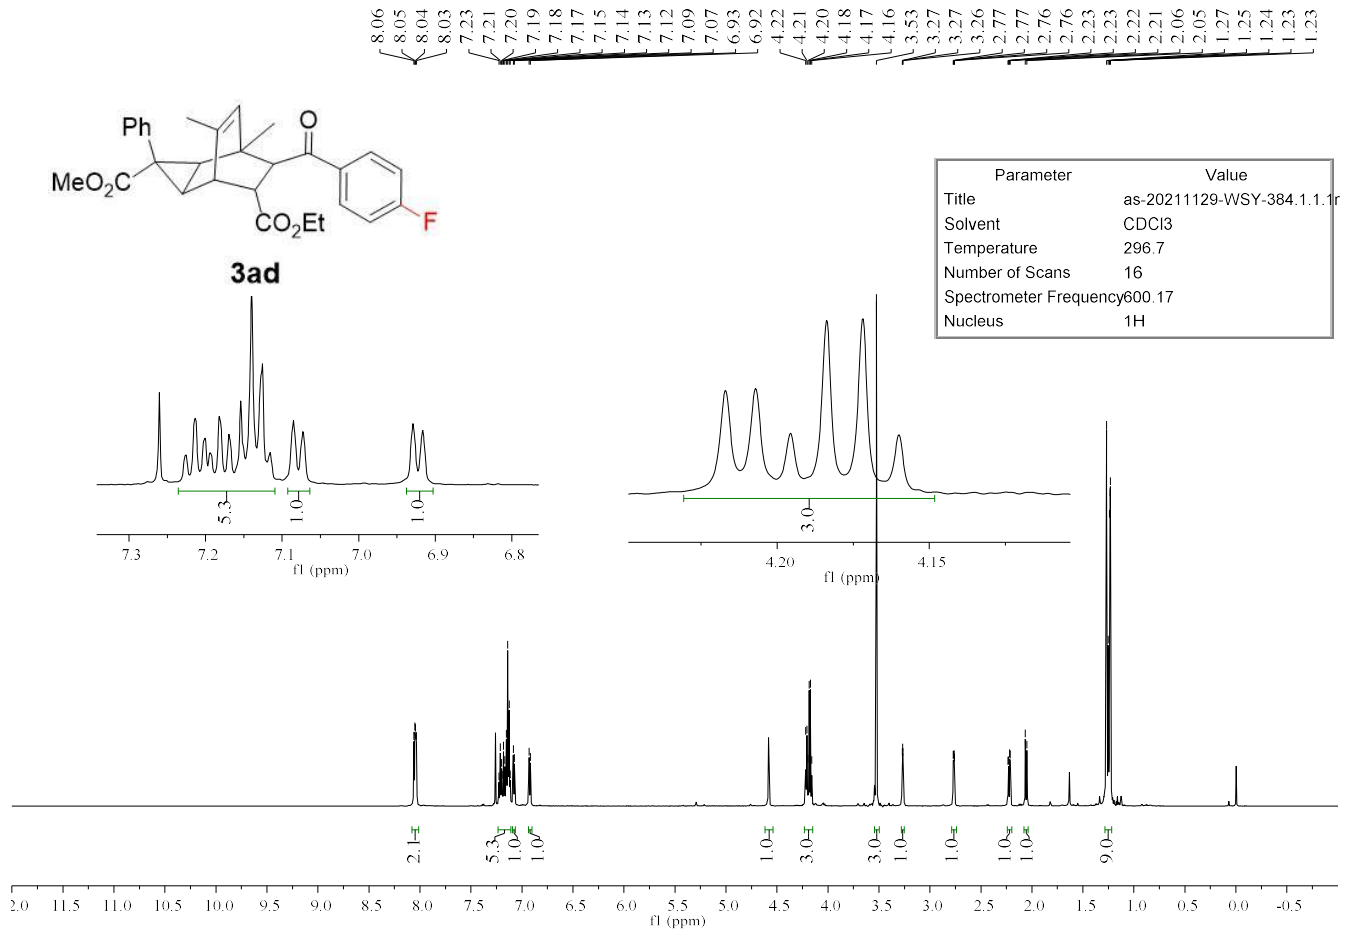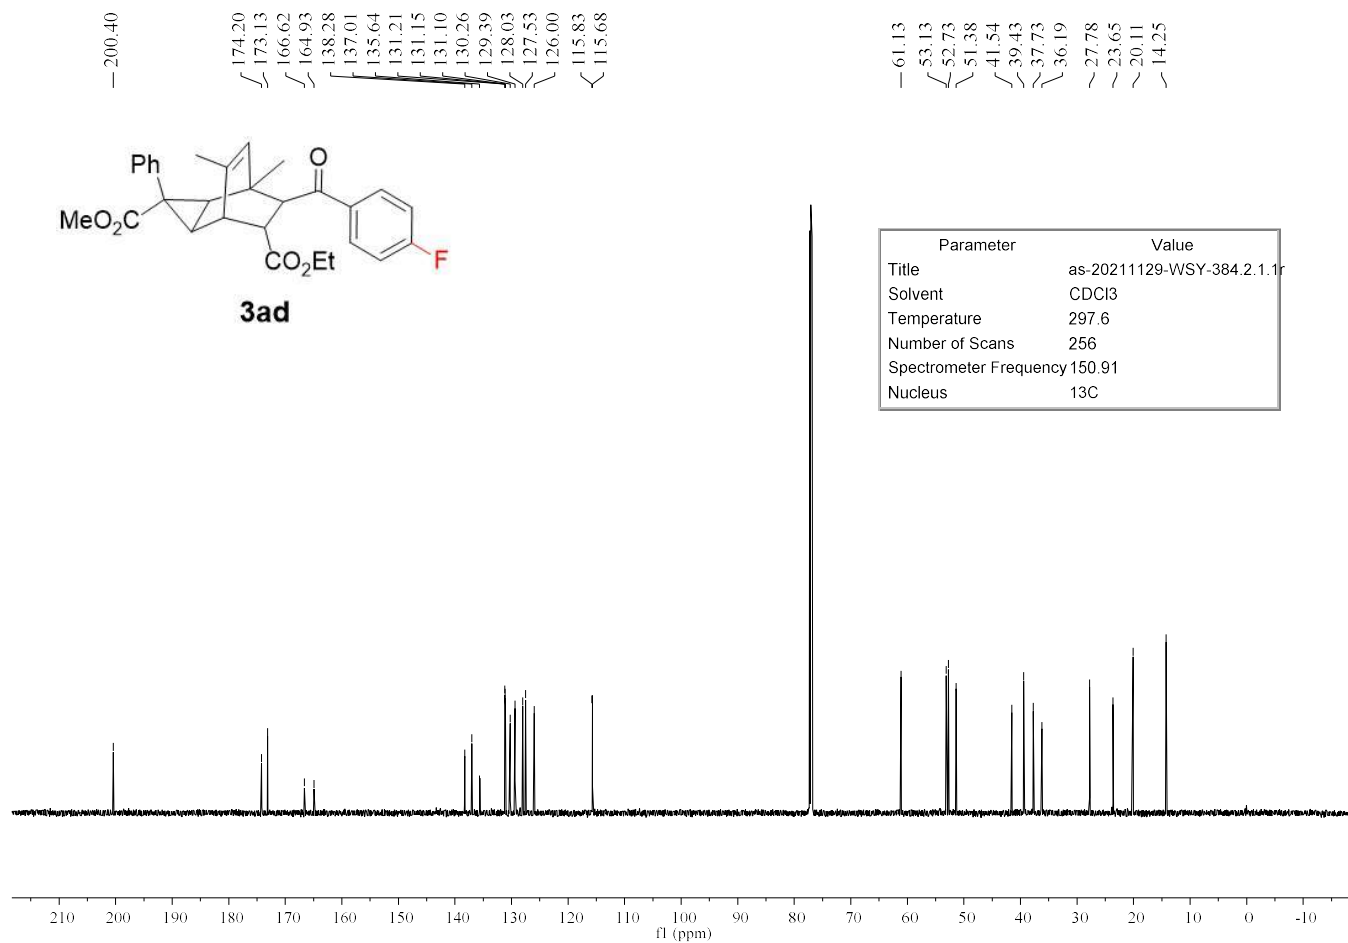



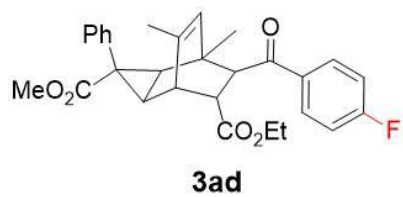

-105.53

| Parameter              | Value                      |
|------------------------|----------------------------|
| Title                  | as-20211129-WSY-384.3.1.1f |
| Solvent                | CDCl <sub>3</sub>          |
| Temperature            | 297.0                      |
| Number of Scans        | 16                         |
| Spectrometer Frequency | 564.72                     |
| Nucleus                | <sup>19</sup> F            |

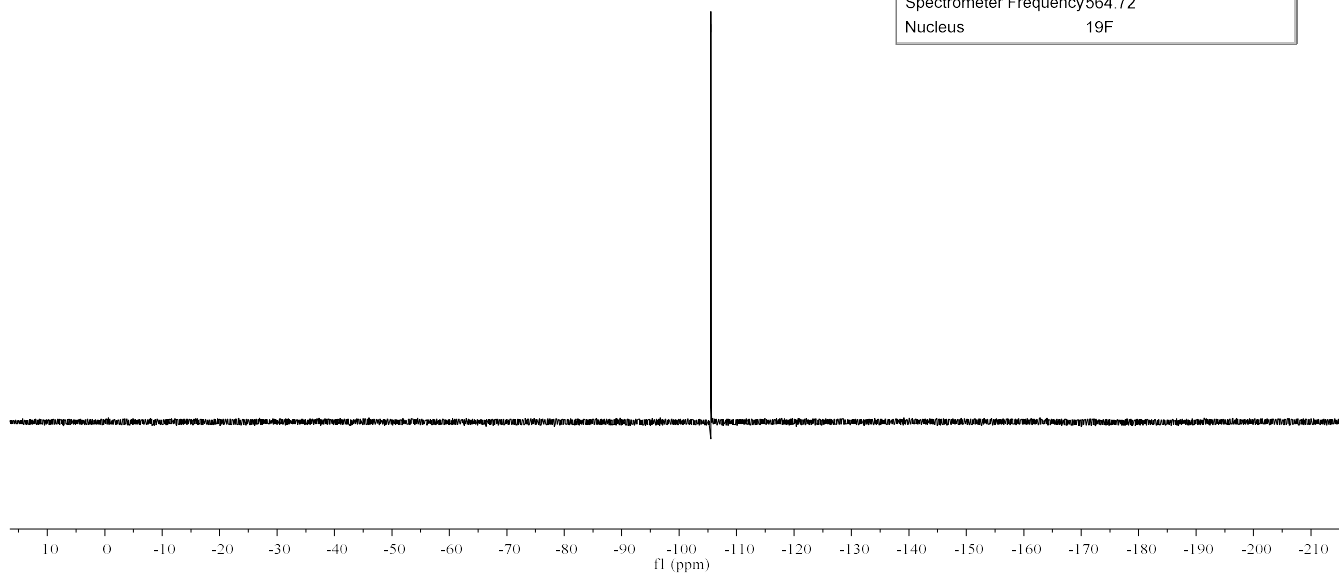

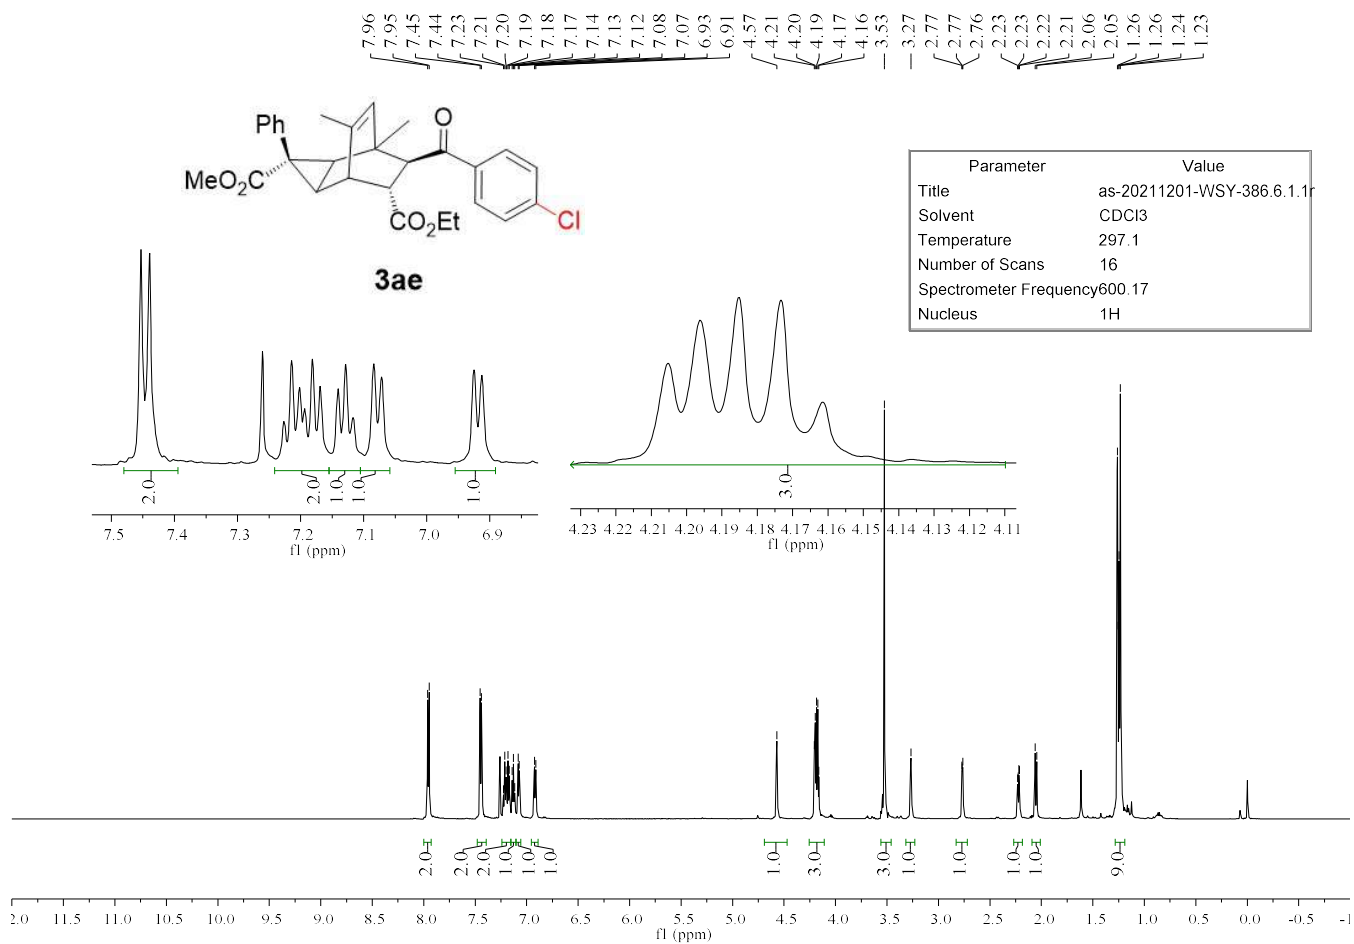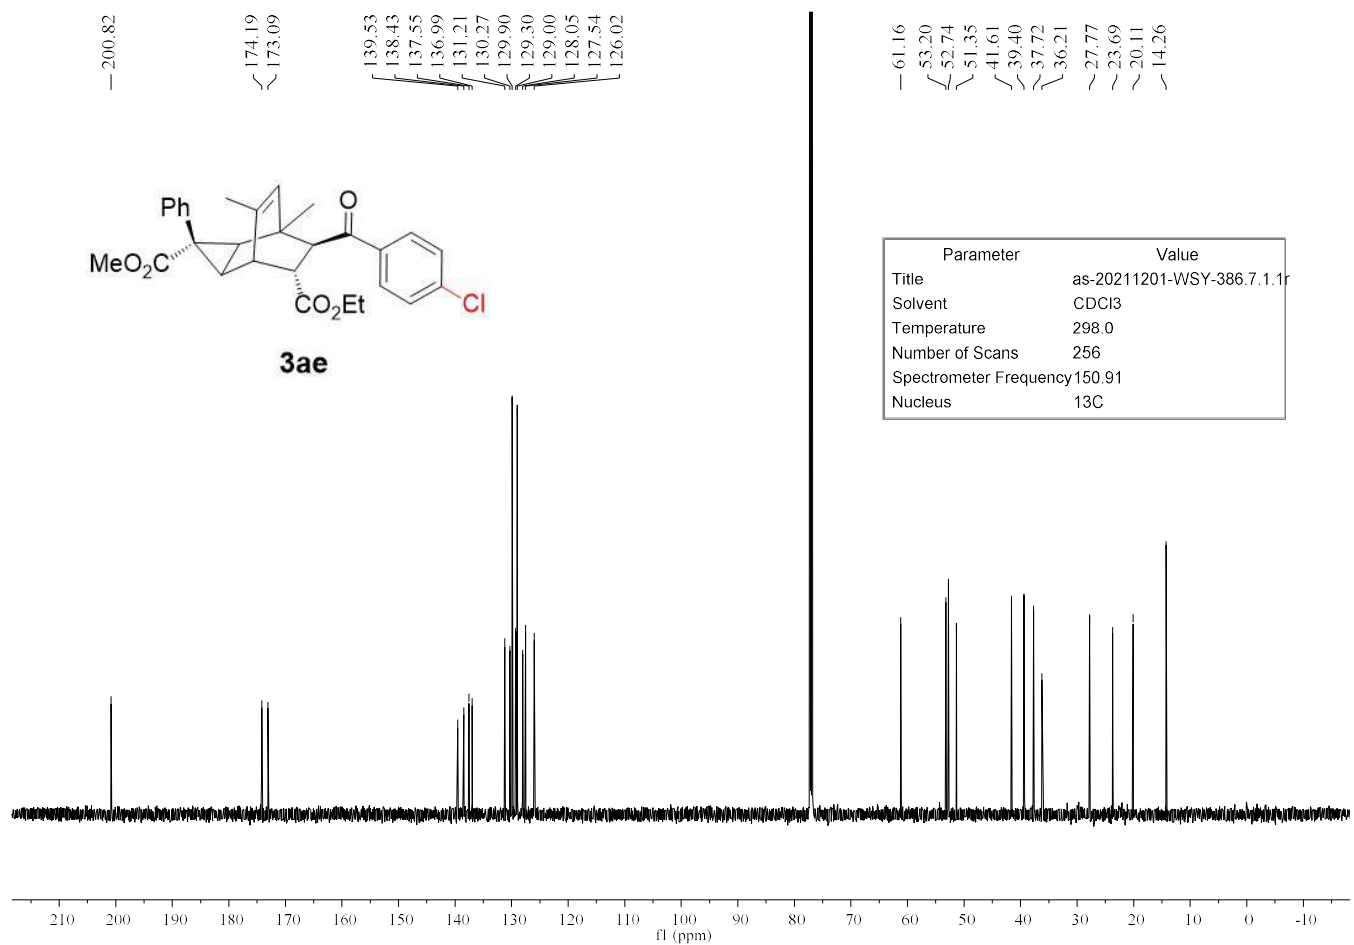

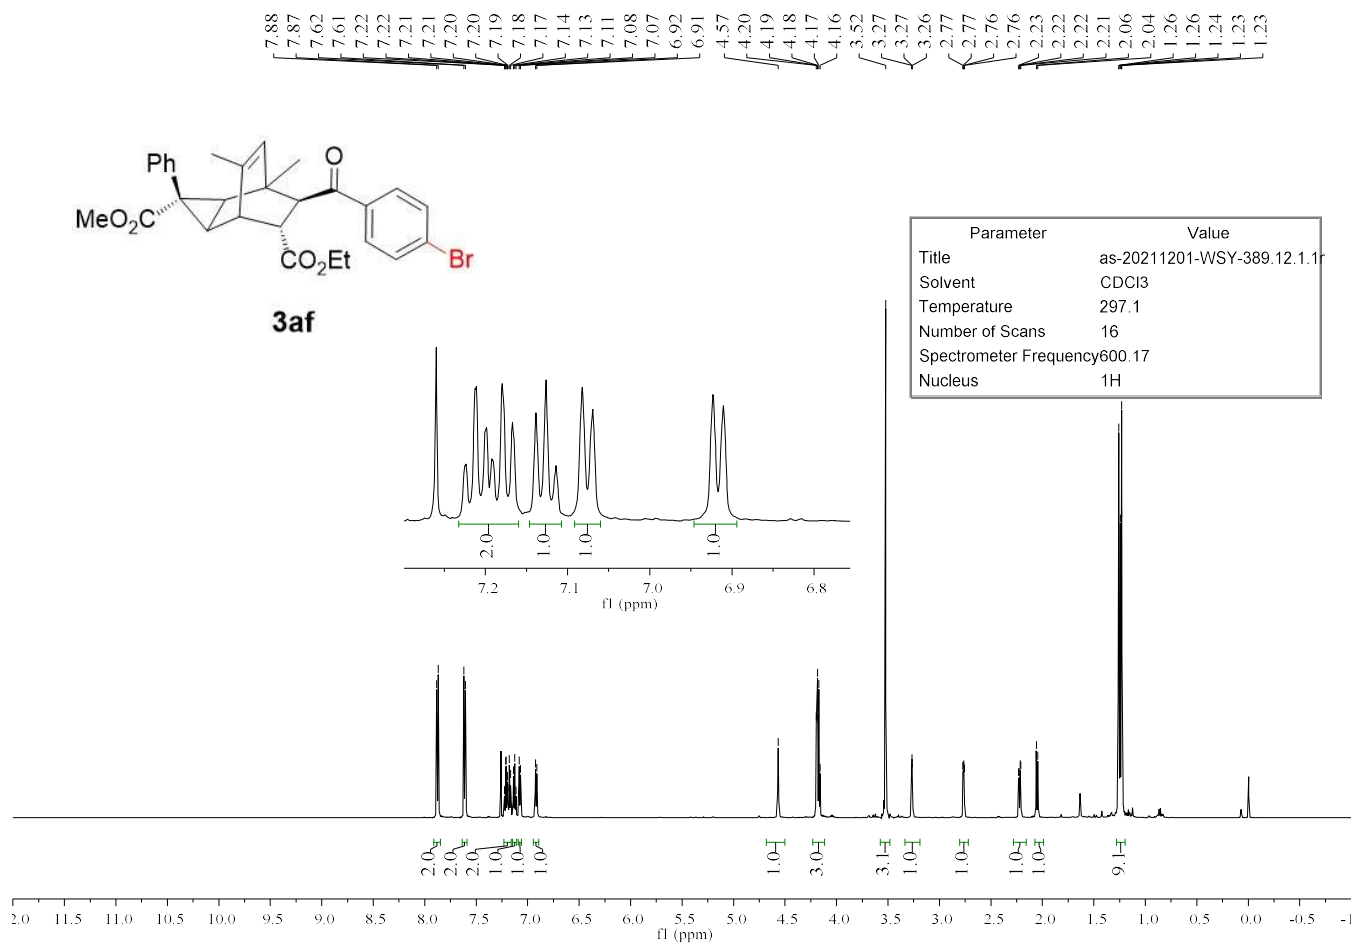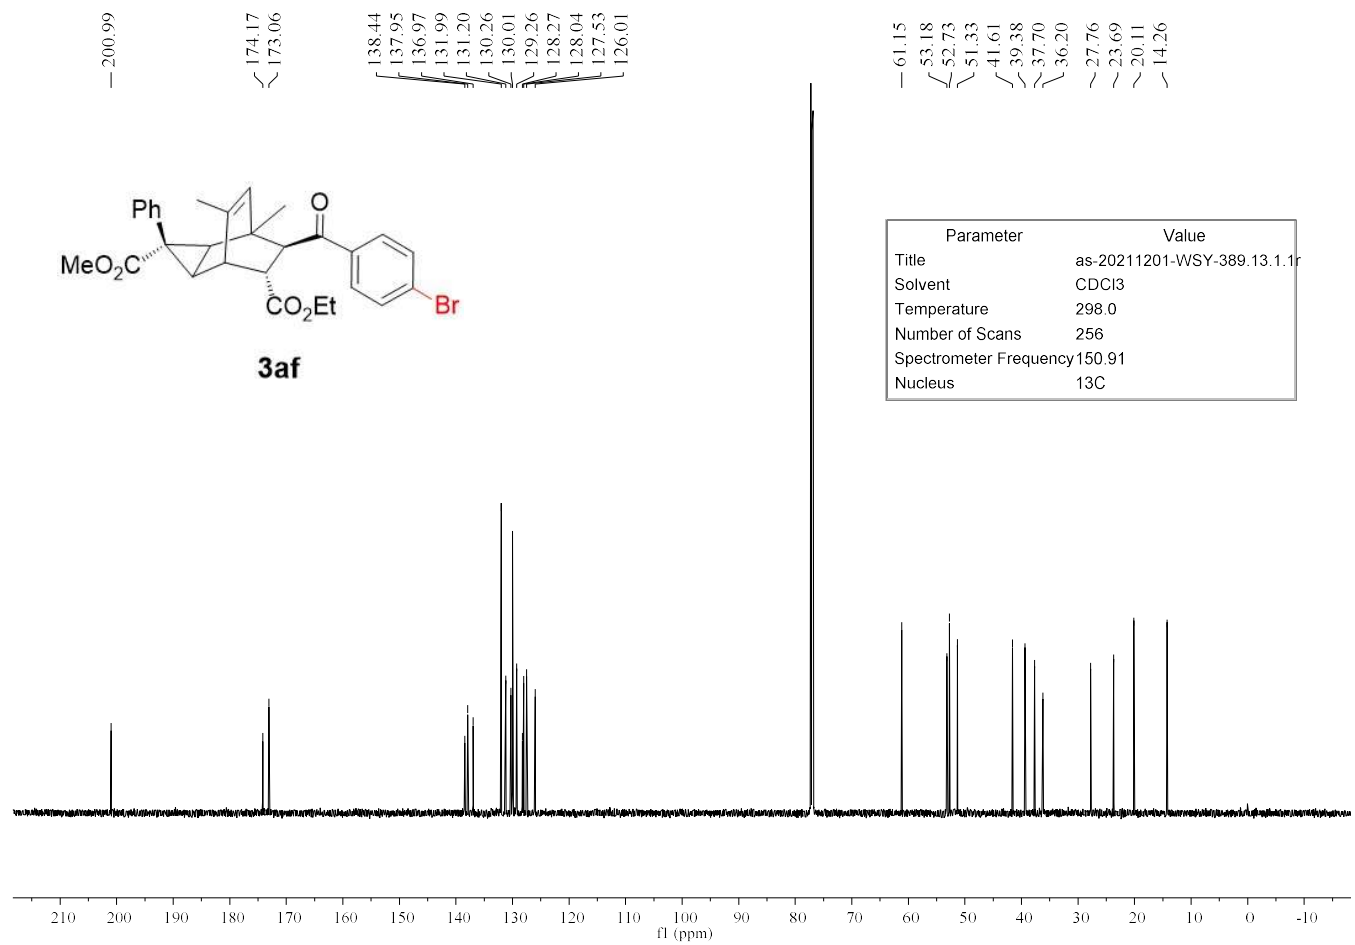

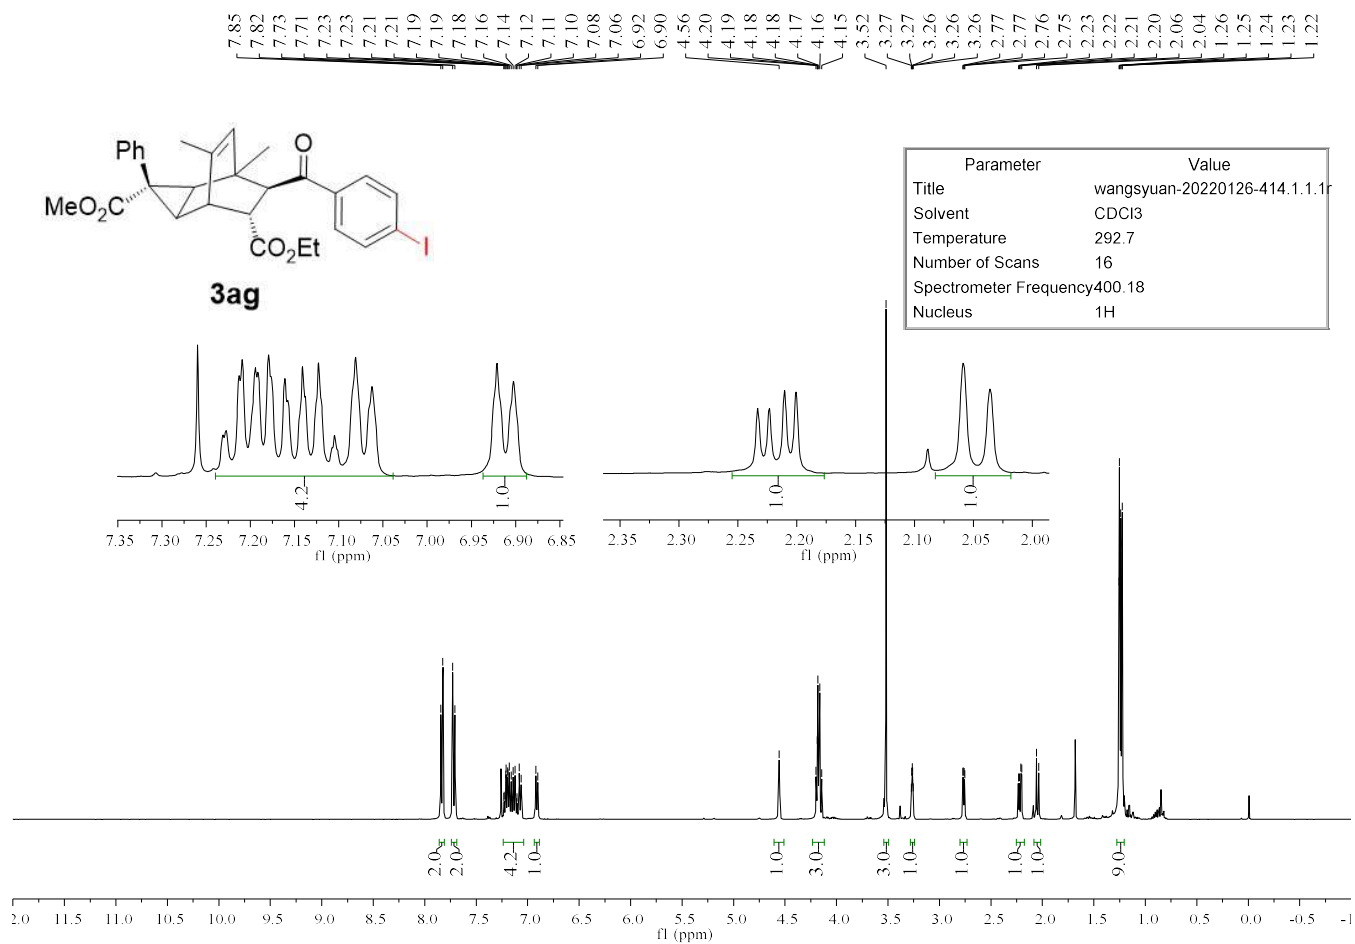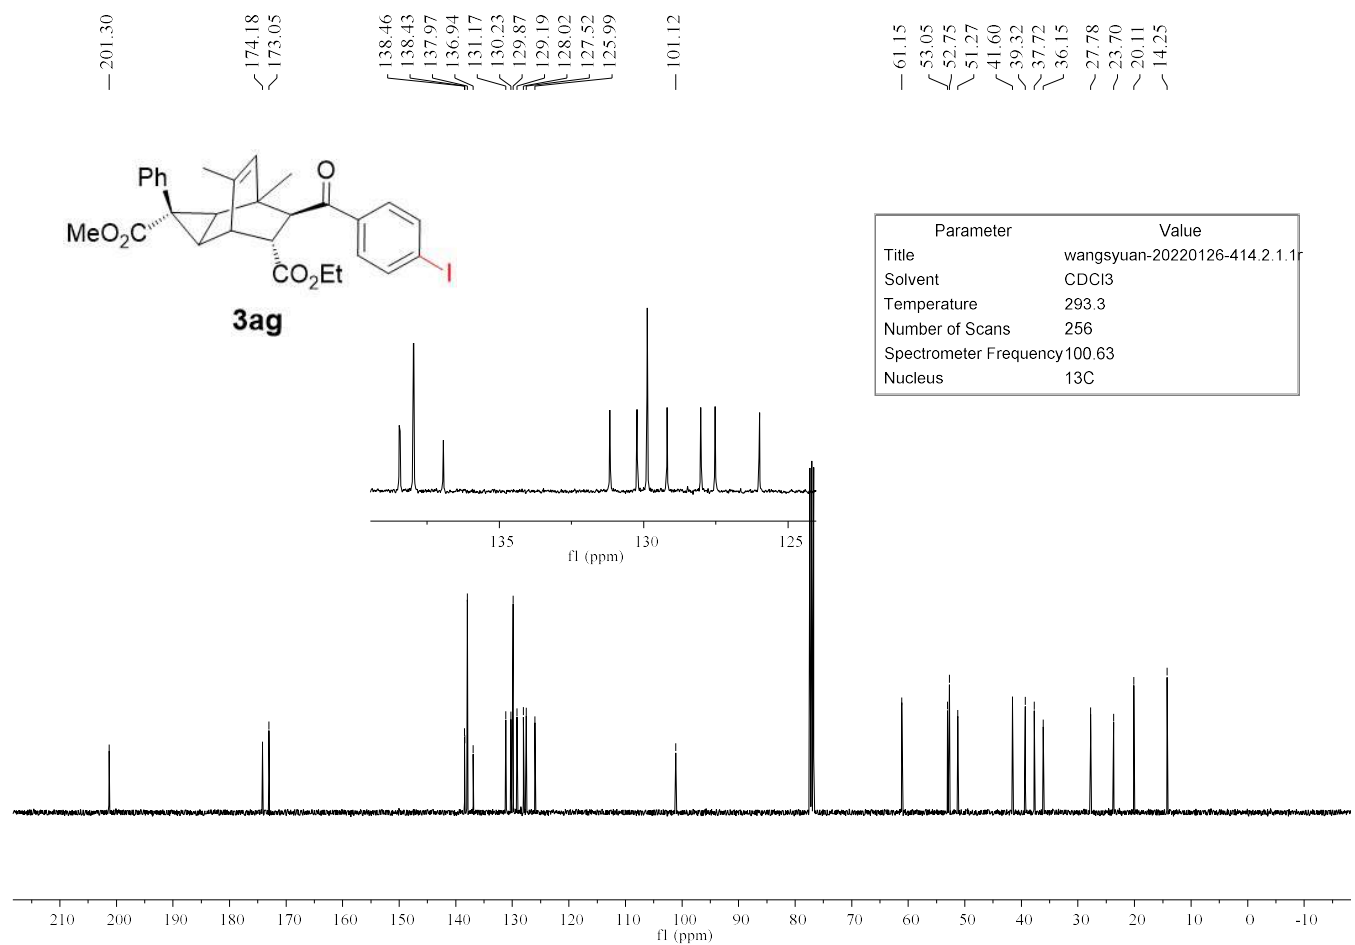

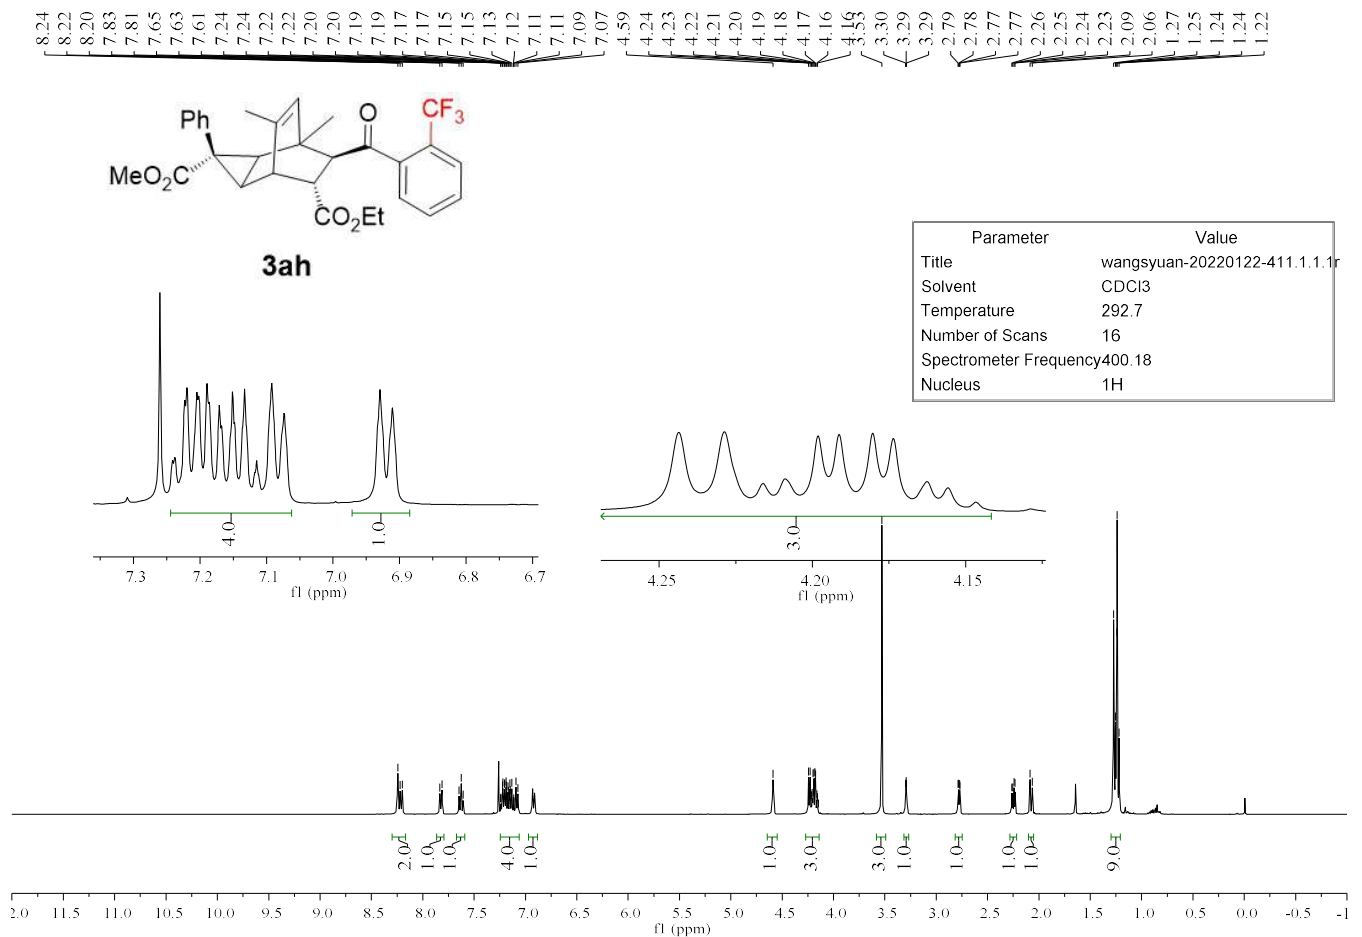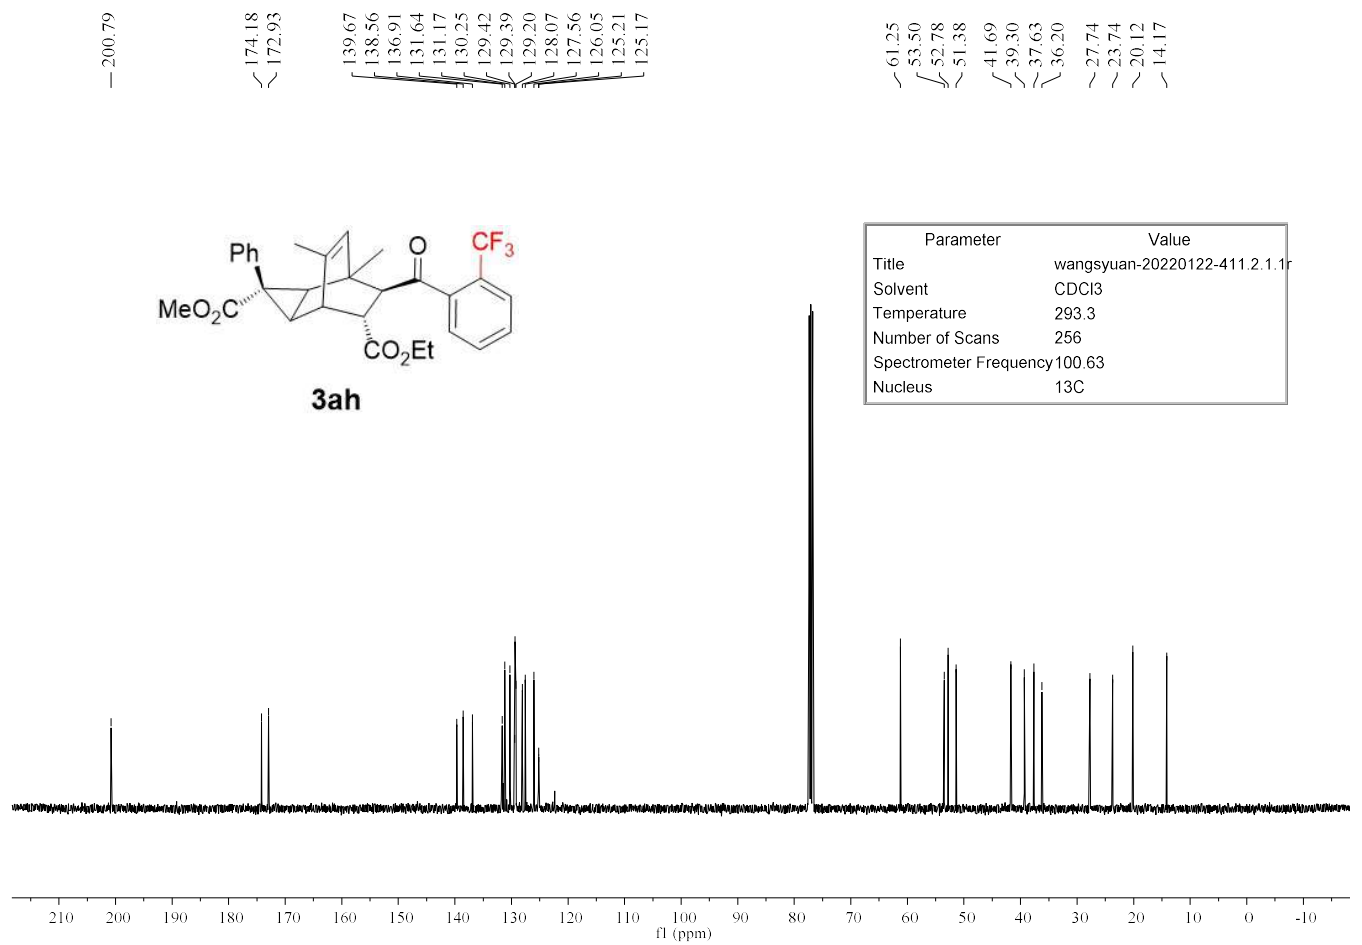

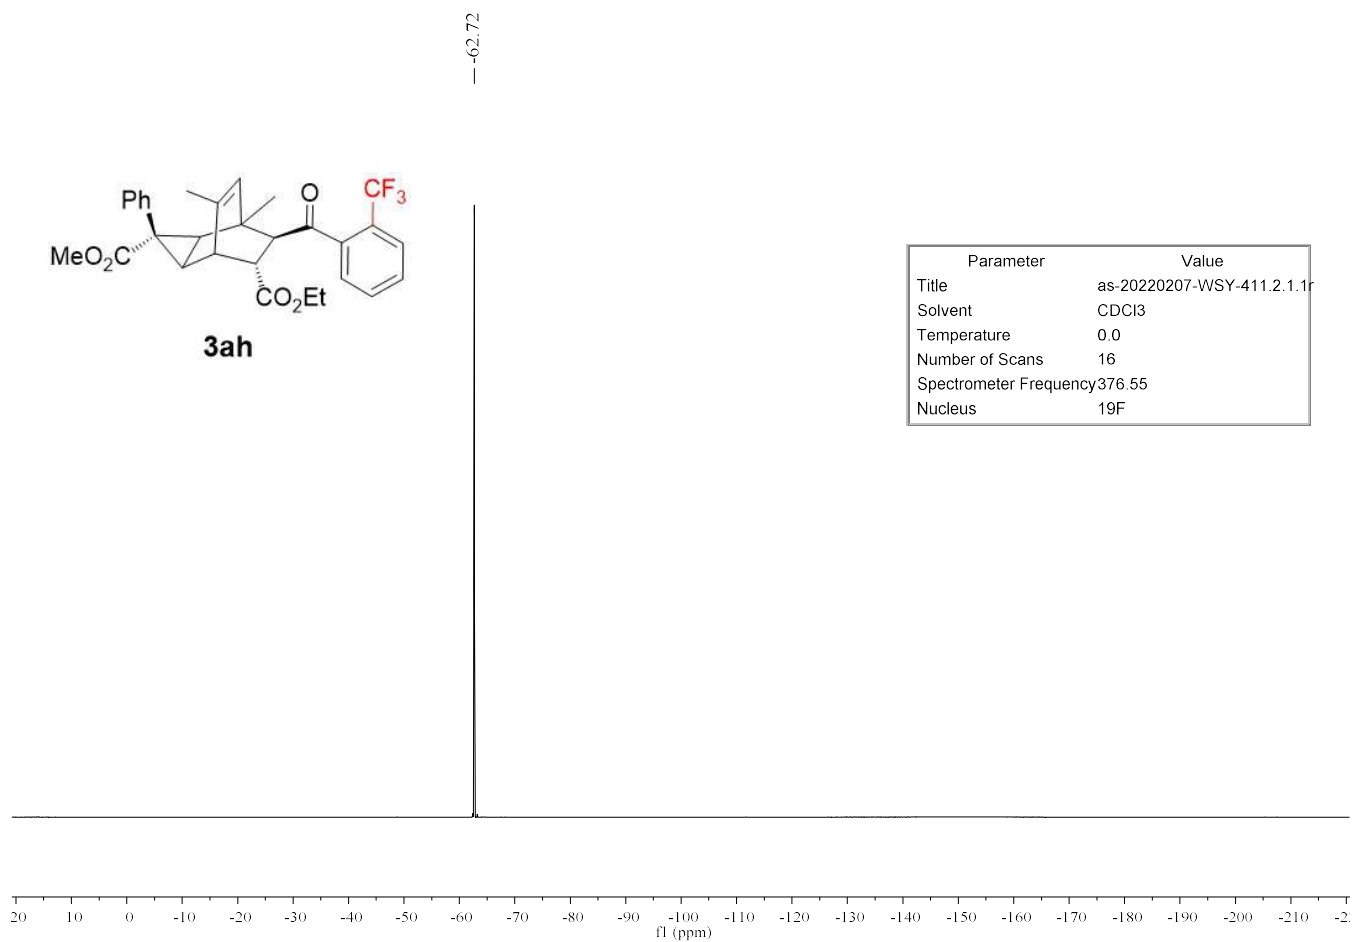

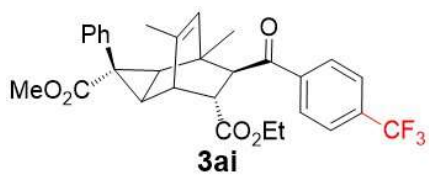

| Parameter              | Value                      |
|------------------------|----------------------------|
| Title                  | as-20211208-wsy-392.7.1.1f |
| Solvent                | CDCl3                      |
| Temperature            | 291.1                      |
| Number of Scans        | 16                         |
| Spectrometer Frequency | 600.17                     |
| Nucleus                | <sup>1</sup> H             |

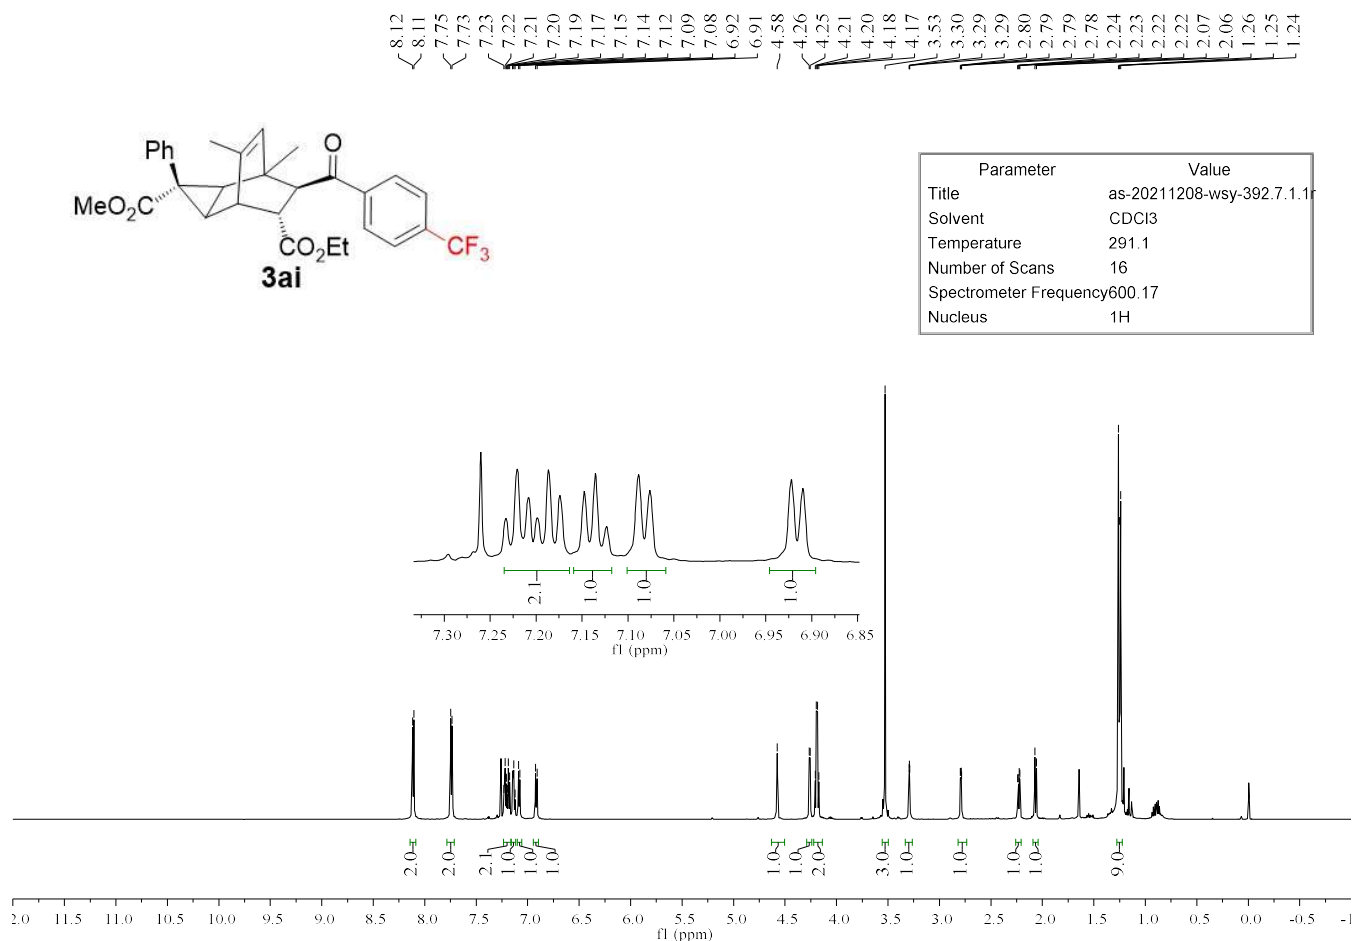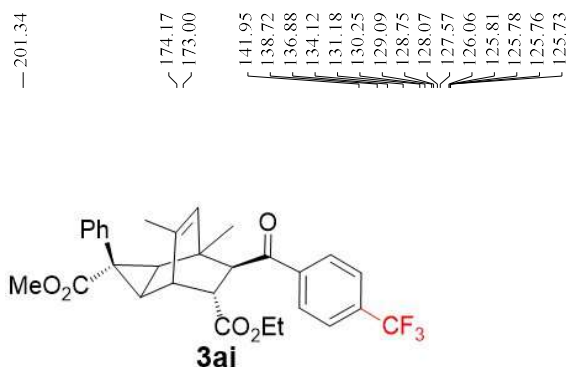

| Parameter              | Value                      |
|------------------------|----------------------------|
| Title                  | as-20211208-wsy-392.8.1.1f |
| Solvent                | CDCl3                      |
| Temperature            | 292.2                      |
| Number of Scans        | 256                        |
| Spectrometer Frequency | 150.91                     |
| Nucleus                | <sup>13</sup> C            |

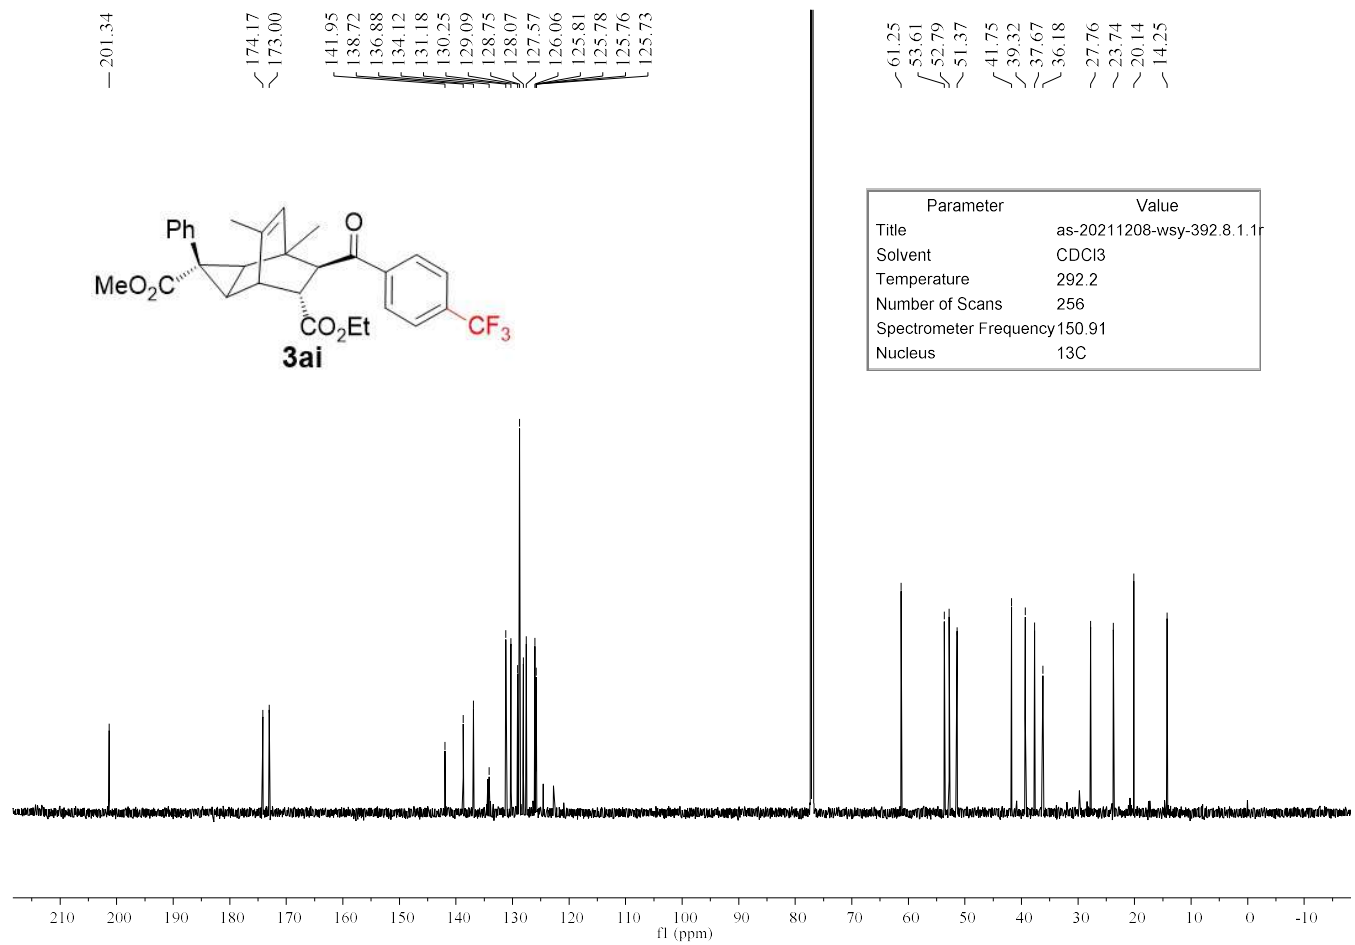

-63.03

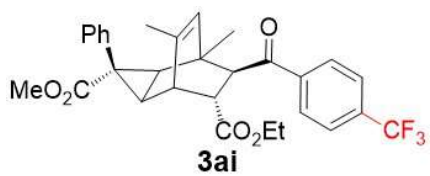

| Parameter              | Value                     |
|------------------------|---------------------------|
| Title                  | as-20211208-wsy-392.9.1.1 |
| Solvent                | CDCl <sub>3</sub>         |
| Temperature            | 291.6                     |
| Number of Scans        | 16                        |
| Spectrometer Frequency | 564.72                    |
| Nucleus                | <sup>19</sup> F           |

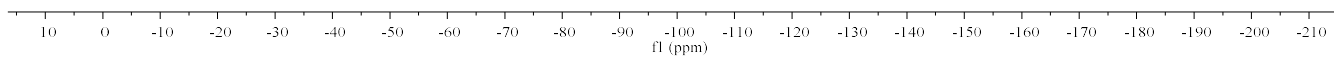



8.34  
8.31  
8.17  
8.15  
7.24  
7.23  
7.22  
7.21  
7.20  
7.19  
7.17  
7.17  
7.16  
7.15  
7.14  
7.12  
7.12  
7.09  
7.07  
6.92  
4.57  
4.27  
4.26  
4.23  
4.21  
4.19  
4.18  
3.53  
3.31  
3.31  
3.31  
3.30  
2.80  
2.79  
2.78  
2.78  
2.23  
2.22  
2.21  
2.20  
2.07  
2.05  
1.29  
1.27  
1.26  
1.25

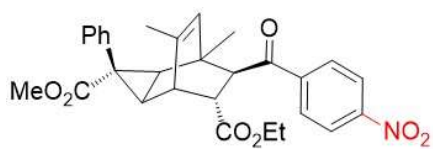

**3aj**

| Parameter              | Value                           |
|------------------------|---------------------------------|
| Title                  | wangsyuan-202111221-400B.1.1.1r |
| Solvent                | CDCl3                           |
| Temperature            | 292.5                           |
| Number of Scans        | 16                              |
| Spectrometer Frequency | 400.18                          |
| Nucleus                | <sup>1</sup> H                  |

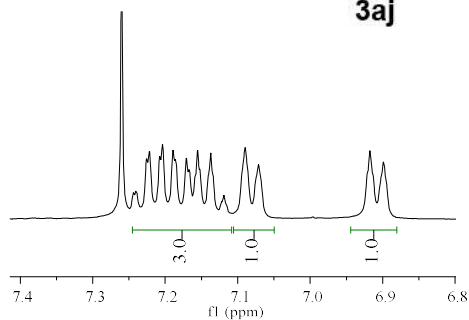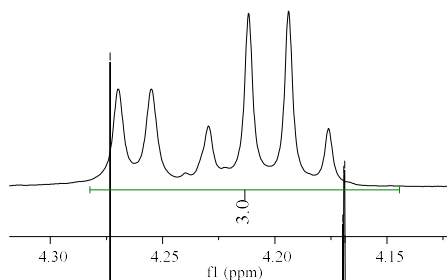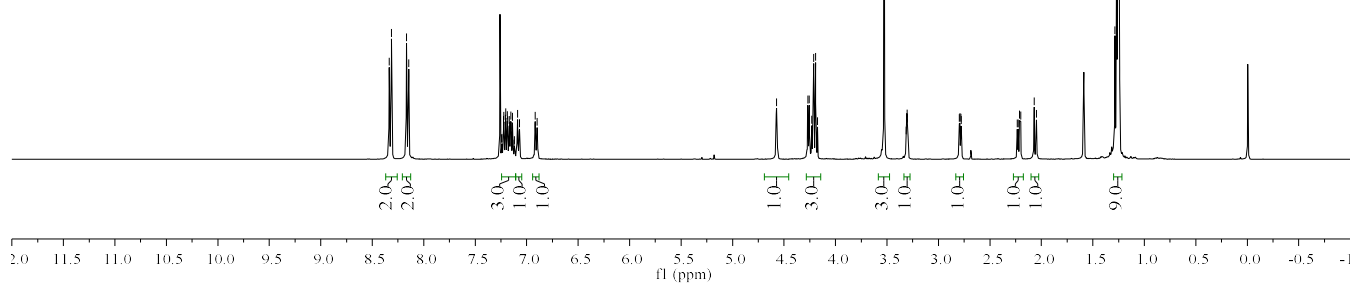

200.98

174.09  
172.92

150.23  
143.88  
138.97  
136.77  
131.16  
130.26  
129.41  
128.93  
128.11  
127.60  
126.12  
123.97

61.37  
54.07  
52.83  
51.46  
41.88  
39.32  
37.56  
36.22  
27.68  
23.78  
20.16  
14.29

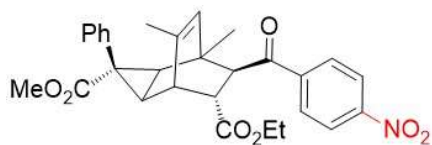

**3aj**

| Parameter              | Value                           |
|------------------------|---------------------------------|
| Title                  | wangsyuan-20211216-400B.12.1.1r |
| Solvent                | CDCl3                           |
| Temperature            | 293.3                           |
| Number of Scans        | 256                             |
| Spectrometer Frequency | 100.63                          |
| Nucleus                | <sup>13</sup> C                 |

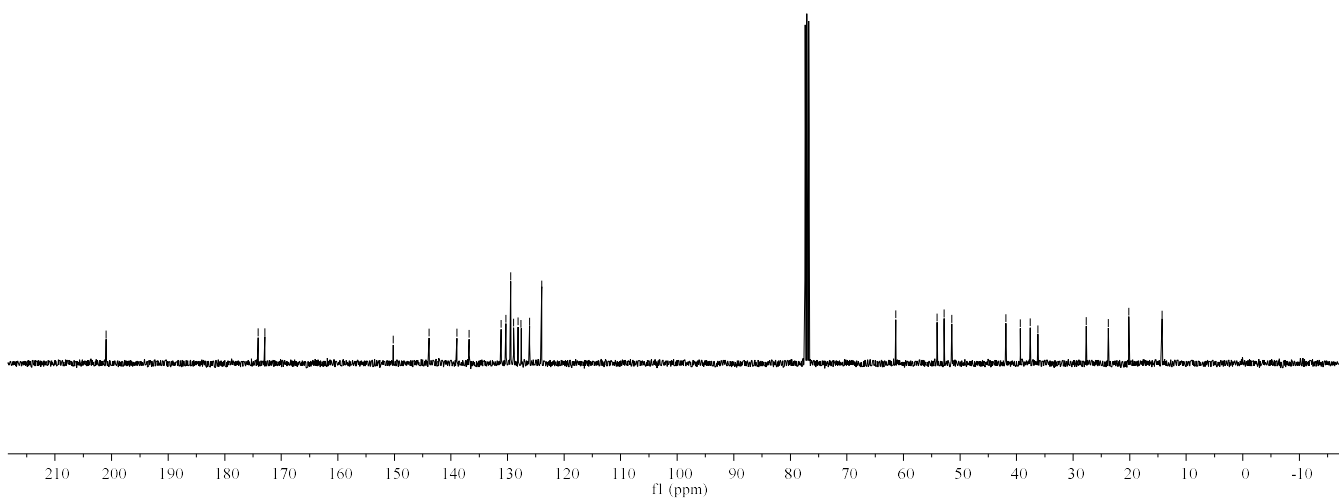

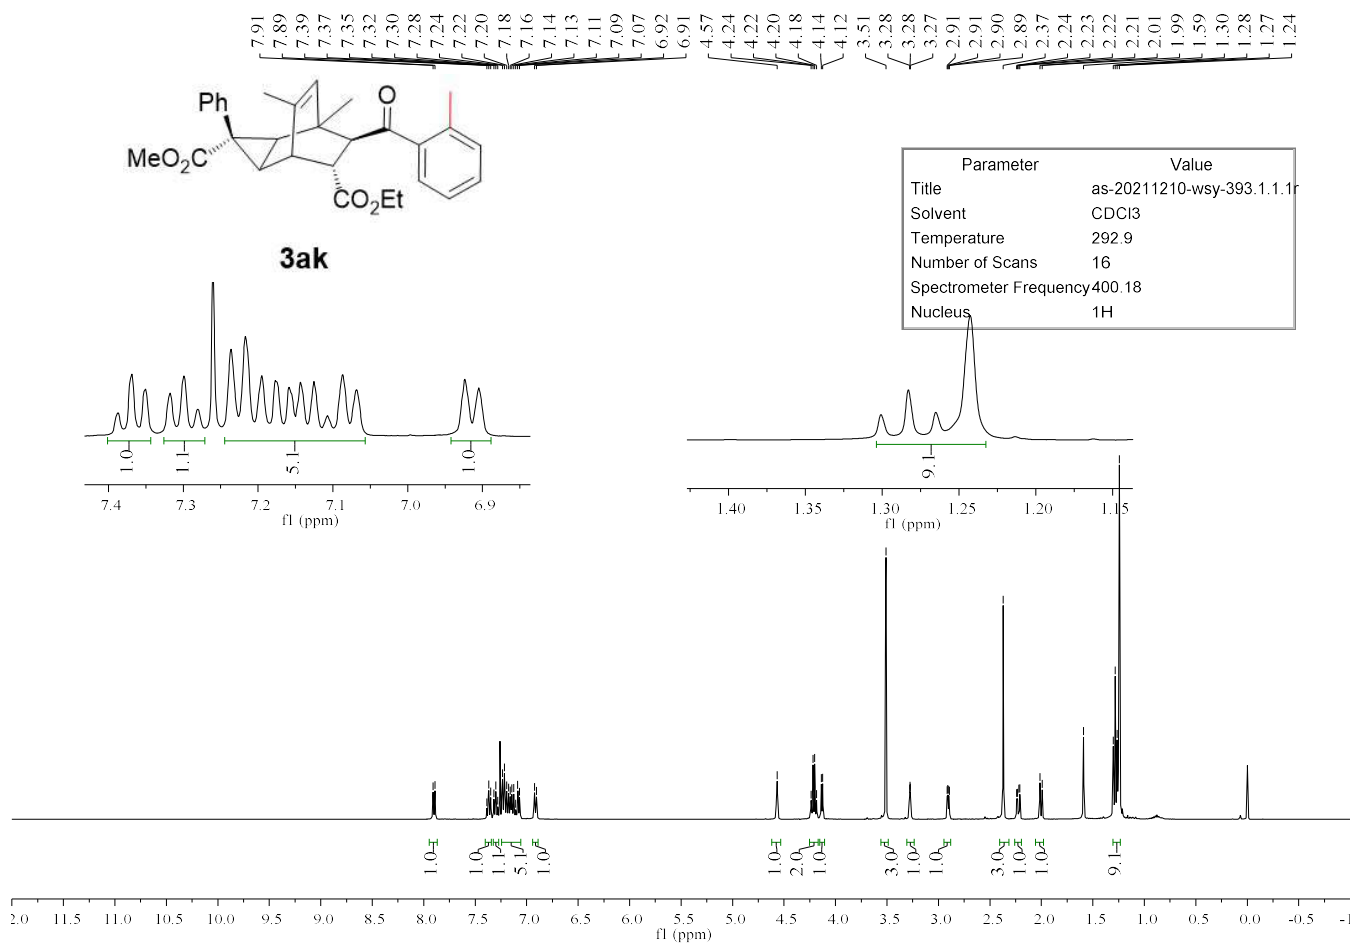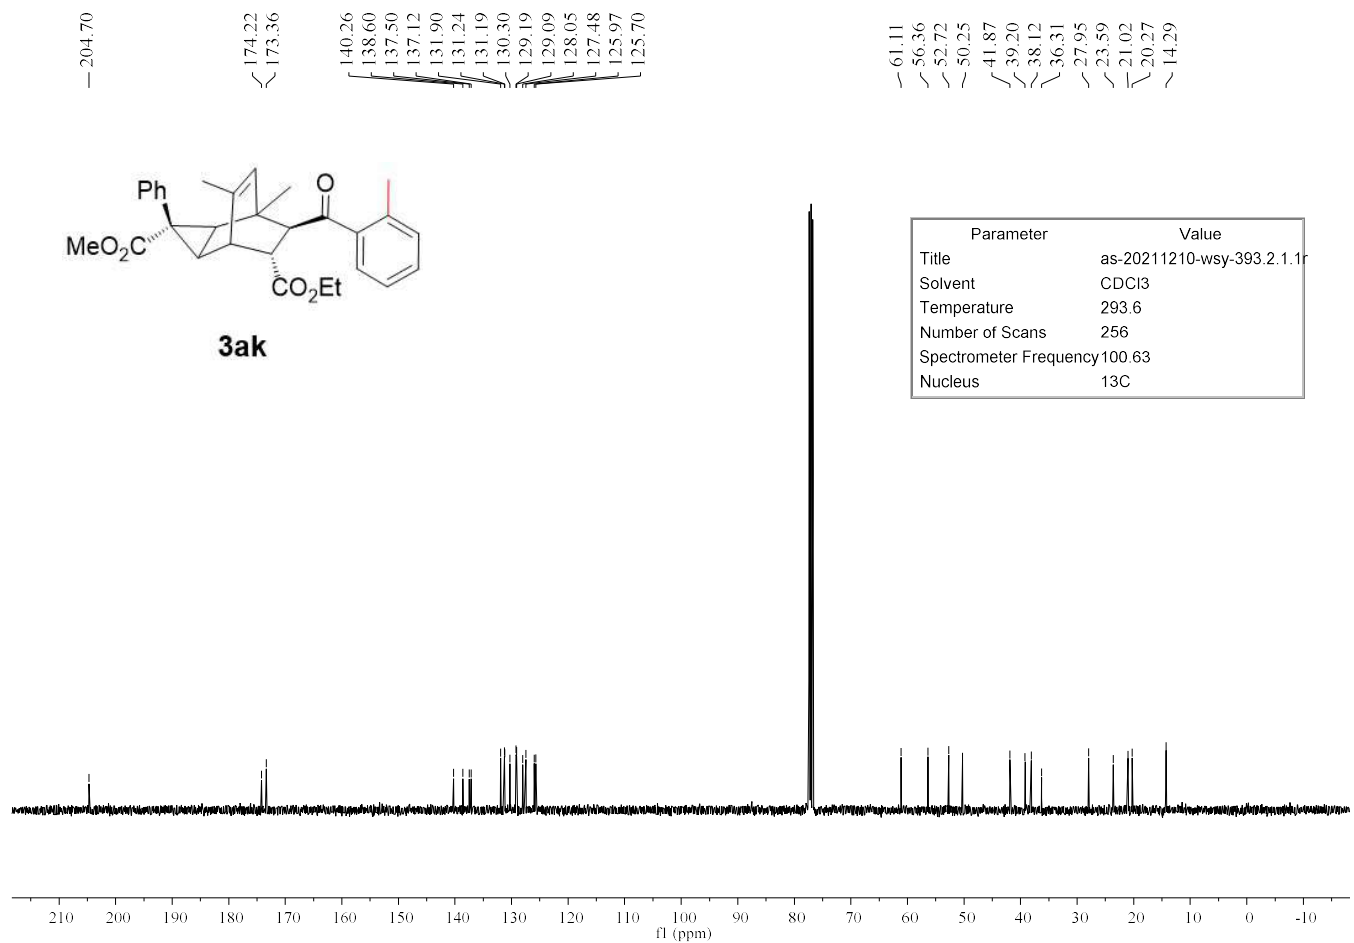



7.82  
7.80  
7.37  
7.35  
7.34  
7.26  
7.23  
7.22  
7.20  
7.18  
7.16  
7.14  
7.13  
7.11  
7.09  
7.07  
6.93  
6.91  
4.57  
4.25  
4.24  
4.21  
4.19  
4.18  
4.17  
4.16  
4.15  
4.14  
4.13  
- 3.53  
- 3.26  
- 2.81  
2.80  
2.42  
2.26  
2.25  
2.24  
2.23  
2.09  
2.07  
1.27  
1.25  
1.23  
1.22

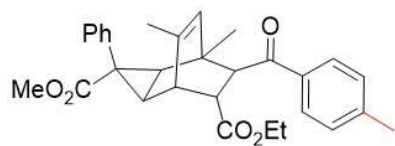

**3am**

| Parameter              | Value                      |
|------------------------|----------------------------|
| Title                  | wsyuan-20211124-377.1.1.1r |
| Solvent                | CDCl3                      |
| Temperature            | 292.9                      |
| Number of Scans        | 16                         |
| Spectrometer Frequency | 400.13                     |
| Nucleus                | 1H                         |

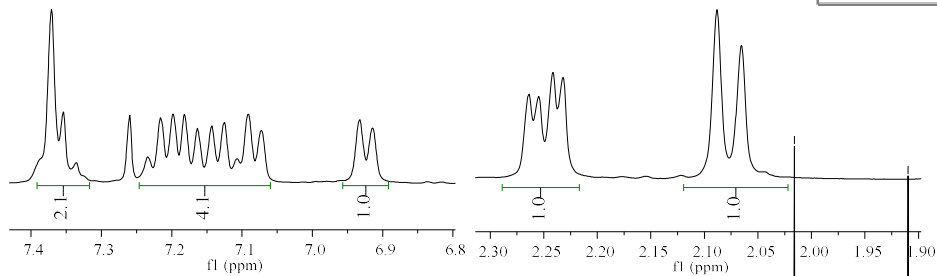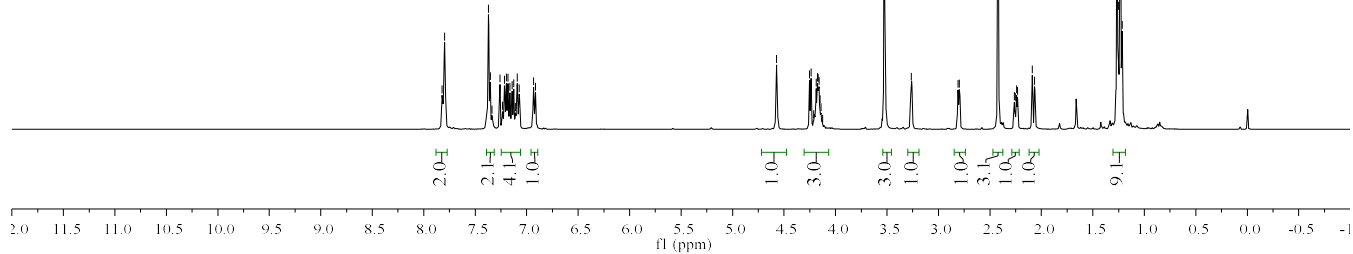

202.07  
174.29  
173.23  
139.35  
138.41  
138.26  
137.12  
133.75  
131.25  
130.29  
129.44  
128.96  
128.53  
128.02  
127.51  
125.97  
125.77  
61.03  
53.17  
52.72  
51.21  
41.55  
39.41  
37.88  
36.23  
27.88  
23.72  
21.45  
20.12  
14.24

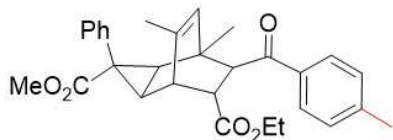

**3am**

| Parameter              | Value                      |
|------------------------|----------------------------|
| Title                  | wsyuan-20220409-377.2.1.1r |
| Solvent                | CDCl3                      |
| Temperature            | 298.0                      |
| Number of Scans        | 256                        |
| Spectrometer Frequency | 100.61                     |
| Nucleus                | 13C                        |

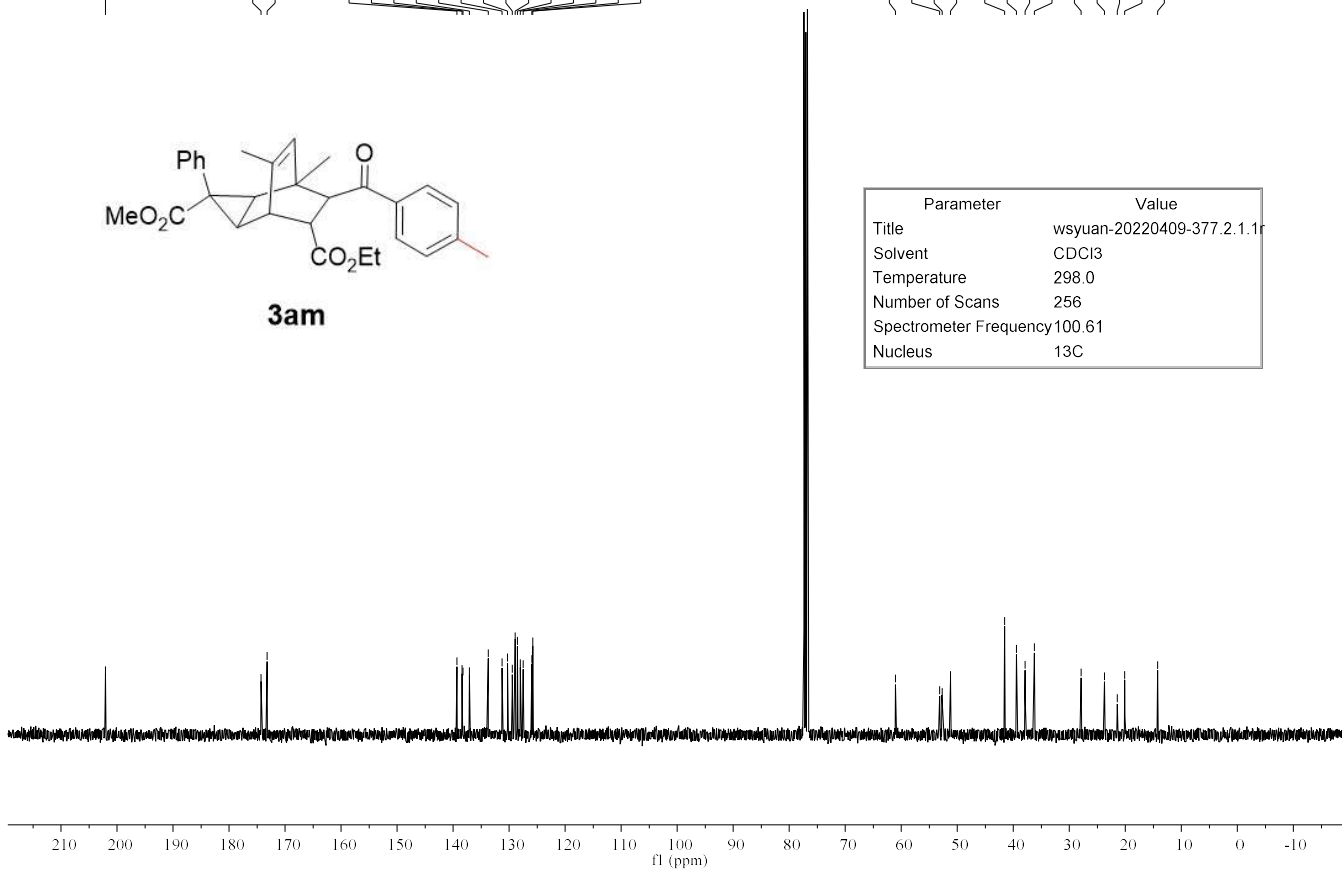

7.95  
7.93  
7.30  
7.28  
7.23  
7.23  
7.21  
7.21  
7.20  
7.19  
7.18  
7.16  
7.14  
7.12  
7.10  
7.09  
7.07  
4.59  
4.25  
4.24  
4.19  
4.19  
4.17  
4.17  
4.16  
4.15  
4.14  
4.13  
3.53  
3.26  
3.26  
3.25  
3.25  
3.24  
2.78  
2.77  
2.76  
2.56  
2.25  
2.24  
2.23  
2.22  
2.09  
2.08  
2.06  
1.87  
1.78  
1.75  
1.45  
1.43  
1.41  
1.38  
1.28  
1.24  
1.23  
1.22  
1.20

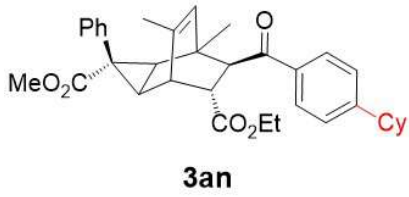

| Parameter              | Value                        |
|------------------------|------------------------------|
| Title                  | wangyuan-20220122-409.1.1.1r |
| Solvent                | CDCl3                        |
| Temperature            | 292.5                        |
| Number of Scans        | 16                           |
| Spectrometer Frequency | 400.18                       |
| Nucleus                | 1H                           |

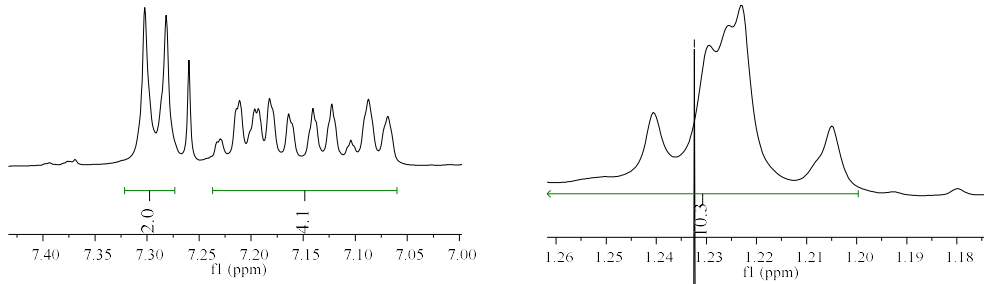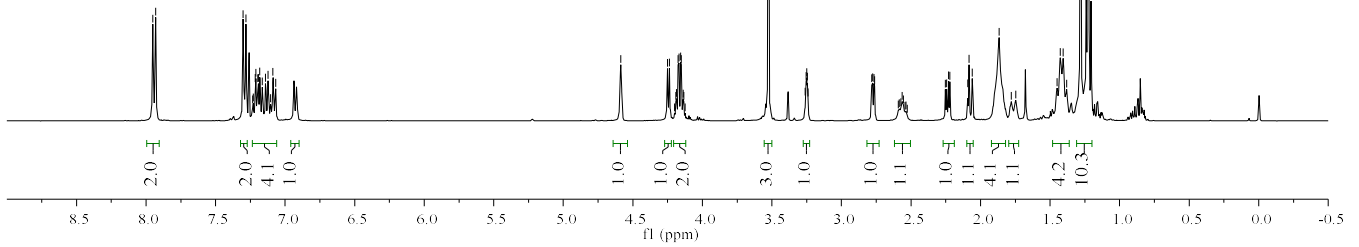

201.49  
174.30  
173.24  
153.65  
138.04  
137.13  
136.89  
131.22  
130.24  
129.58  
128.72  
127.99  
127.49  
127.12  
125.93  
61.00  
52.83  
52.71  
51.31  
44.64  
41.46  
39.44  
37.86  
36.13  
34.10  
34.07  
27.89  
26.74  
26.05  
23.67  
20.11  
14.22

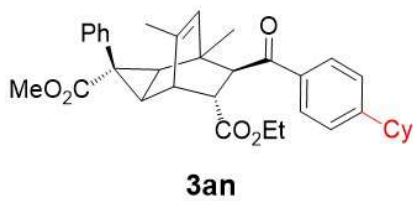

| Parameter              | Value                        |
|------------------------|------------------------------|
| Title                  | wangyuan-20220122-409.2.1.1r |
| Solvent                | CDCl3                        |
| Temperature            | 293.2                        |
| Number of Scans        | 256                          |
| Spectrometer Frequency | 100.63                       |
| Nucleus                | 13C                          |

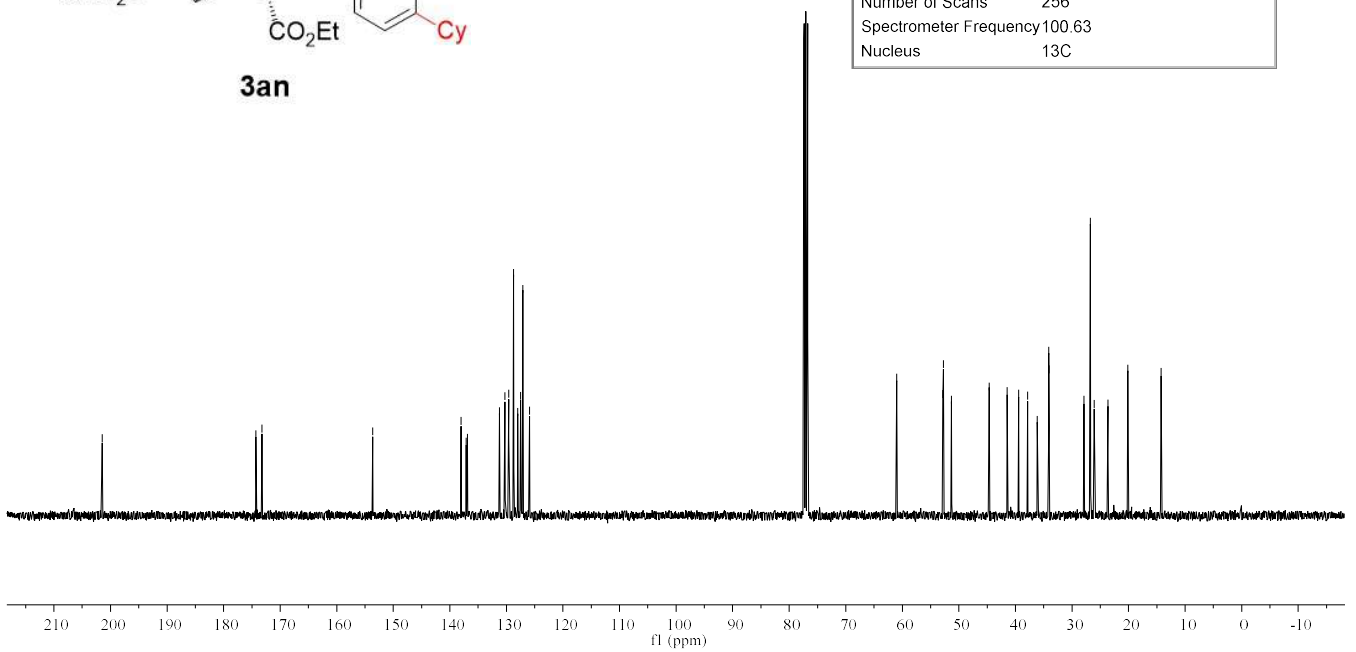

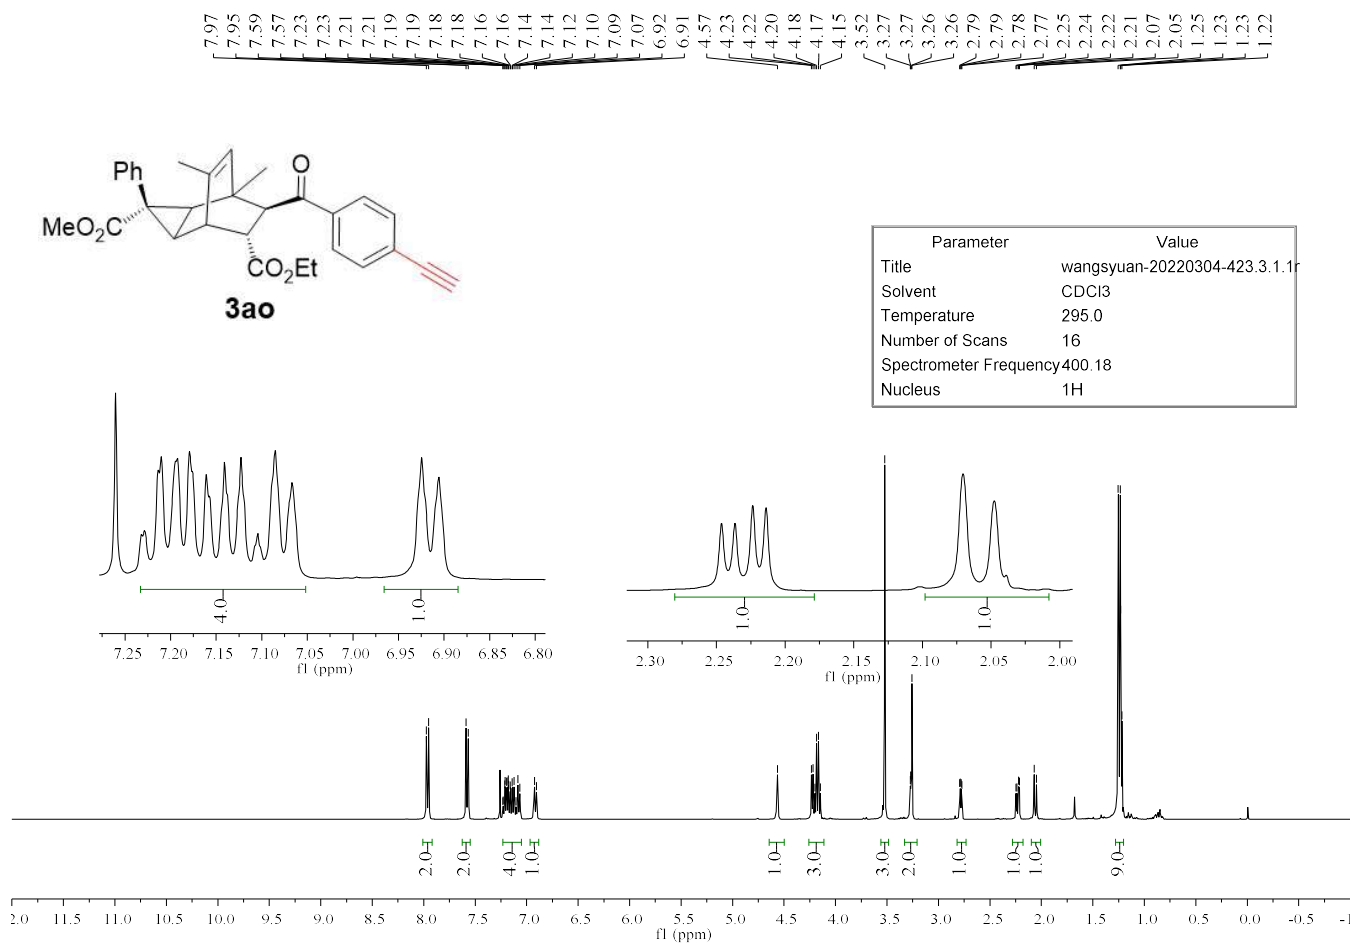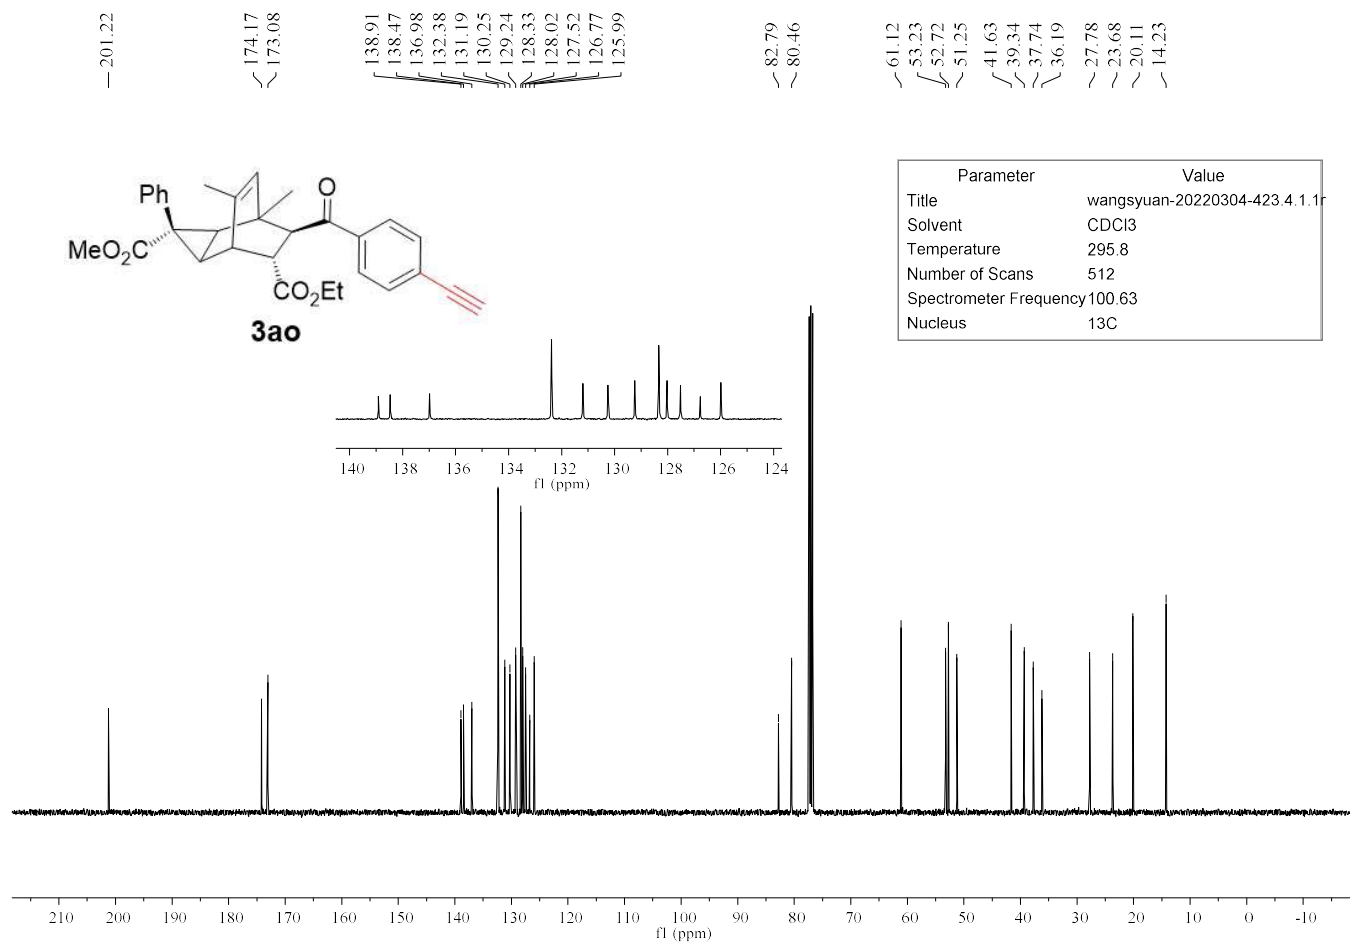

8.11  
8.09  
7.72  
7.70  
7.66  
7.66  
7.64  
7.50  
7.50  
7.48  
7.46  
7.42  
7.41  
7.41  
7.25  
7.23  
7.23  
7.21  
7.21  
7.20  
7.18  
7.18  
7.16  
7.14  
7.12  
7.11  
7.09  
6.96  
6.94  
4.61  
4.32  
4.30  
4.22  
4.22  
4.21  
4.20  
4.19  
4.18  
4.17  
4.17  
3.54  
3.30  
3.29  
3.29  
3.29  
2.84  
2.84  
2.83  
2.82  
2.28  
2.27  
2.26  
2.25  
2.12  
2.10  
1.32  
1.27  
1.26  
1.25  
1.24

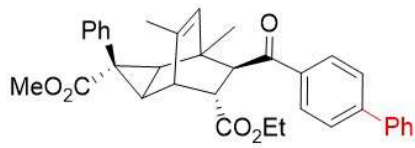

**3ap**

| Parameter              | Value                        |
|------------------------|------------------------------|
| Title                  | wangyuan-20211216-399.7.1.1r |
| Solvent                | CDCl <sub>3</sub>            |
| Temperature            | 292.7                        |
| Number of Scans        | 16                           |
| Spectrometer Frequency | 400.18                       |
| Nucleus                | <sup>1</sup> H               |

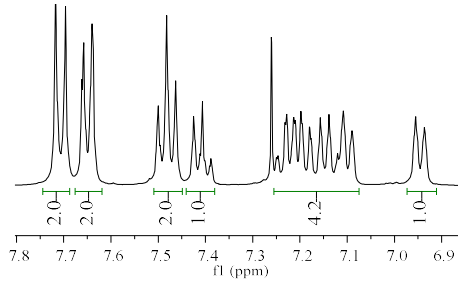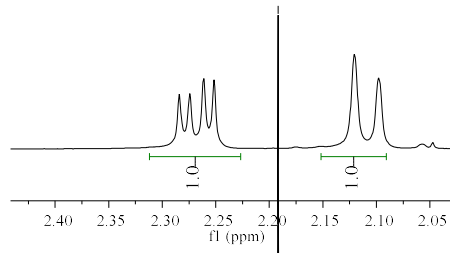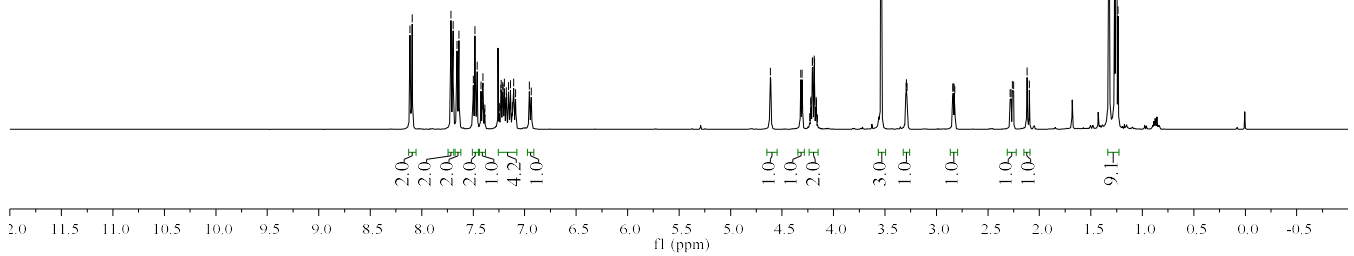

201.46

174.27  
173.20

145.61  
139.83  
138.28  
137.82  
137.07  
131.22  
130.25  
129.42  
129.09  
128.96  
128.24  
128.01  
127.51  
127.28  
125.96

61.07

53.07

52.72

51.30

41.59

39.40

37.86

36.17

27.88

23.73

20.13

14.25

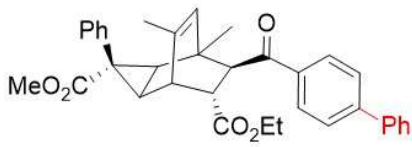

**3ap**

| Parameter              | Value                        |
|------------------------|------------------------------|
| Title                  | wangyuan-20211216-399.8.1.1r |
| Solvent                | CDCl <sub>3</sub>            |
| Temperature            | 293.4                        |
| Number of Scans        | 256                          |
| Spectrometer Frequency | 100.63                       |
| Nucleus                | <sup>13</sup> C              |

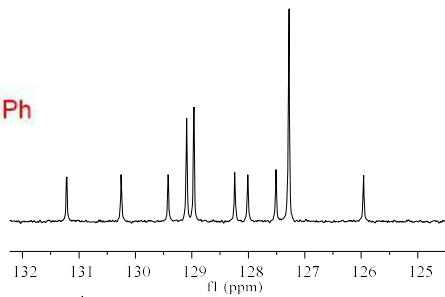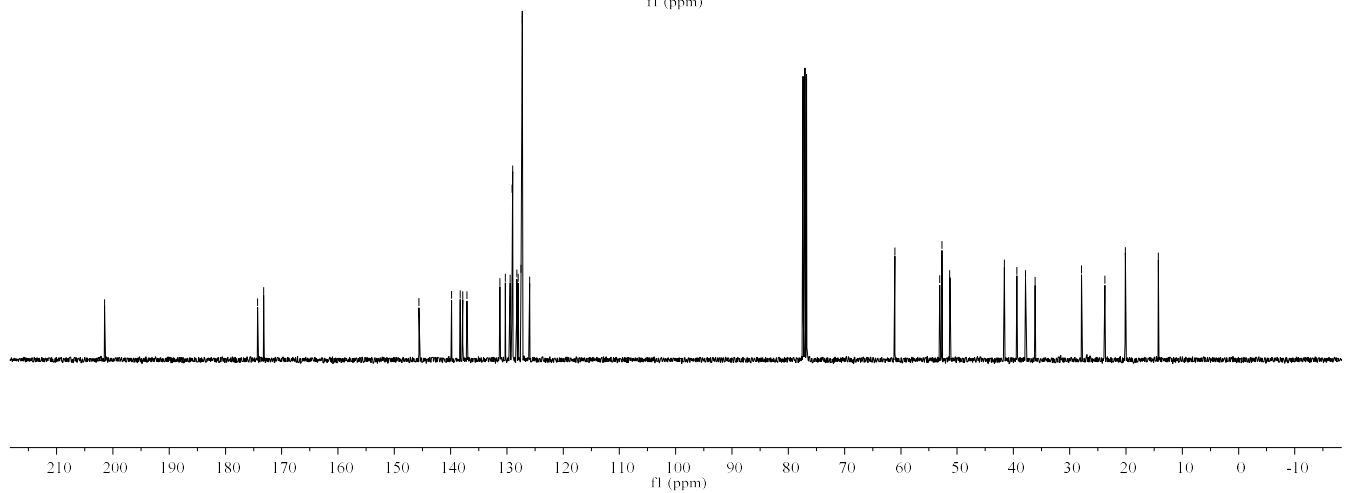

8.07  
7.86  
7.86  
7.84  
7.84  
7.57  
7.55  
7.23  
7.21  
7.20  
7.20  
7.19  
7.17  
7.15  
7.13  
7.11  
7.08  
7.06  
6.92  
6.90  
4.56  
4.21  
4.20  
4.20  
4.18  
4.18  
4.16  
4.15  
4.13  
3.53  
3.28  
3.28  
3.27  
2.75  
2.75  
2.74  
2.73  
2.24  
2.23  
2.21  
2.20  
2.06  
2.04  
2.04  
1.27  
1.26  
1.24  
1.23  
1.23

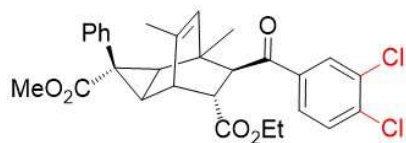

**3aq**

| Parameter              | Value                      |
|------------------------|----------------------------|
| Title                  | wsyuan-20211125-380.1.1.1r |
| Solvent                | CDCl3                      |
| Temperature            | 292.8                      |
| Number of Scans        | 16                         |
| Spectrometer Frequency | 400.13                     |
| Nucleus                | 1H                         |

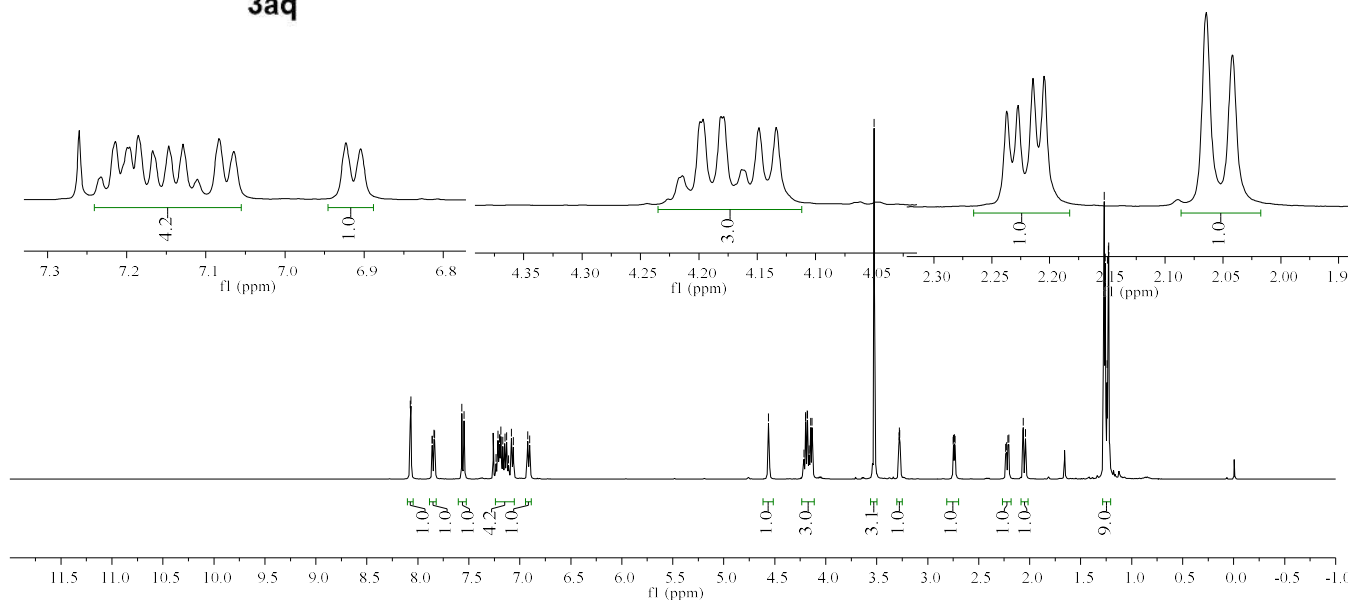

199.88  
174.14  
172.92  
138.71  
138.61  
137.61  
136.86  
133.37  
131.16  
130.80  
130.38  
130.23  
129.10  
128.05  
127.55  
127.52  
126.04  
61.27  
53.37  
52.78  
51.39  
41.70  
39.29  
37.61  
36.17  
27.70  
23.69  
20.11  
14.25

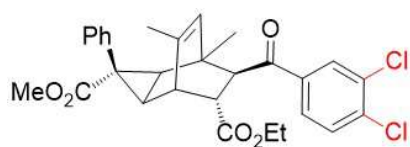

**3aq**

| Parameter              | Value                      |
|------------------------|----------------------------|
| Title                  | wsyuan-20211125-380.2.1.1r |
| Solvent                | CDCl3                      |
| Temperature            | 293.0                      |
| Number of Scans        | 256                        |
| Spectrometer Frequency | 100.61                     |
| Nucleus                | 13C                        |

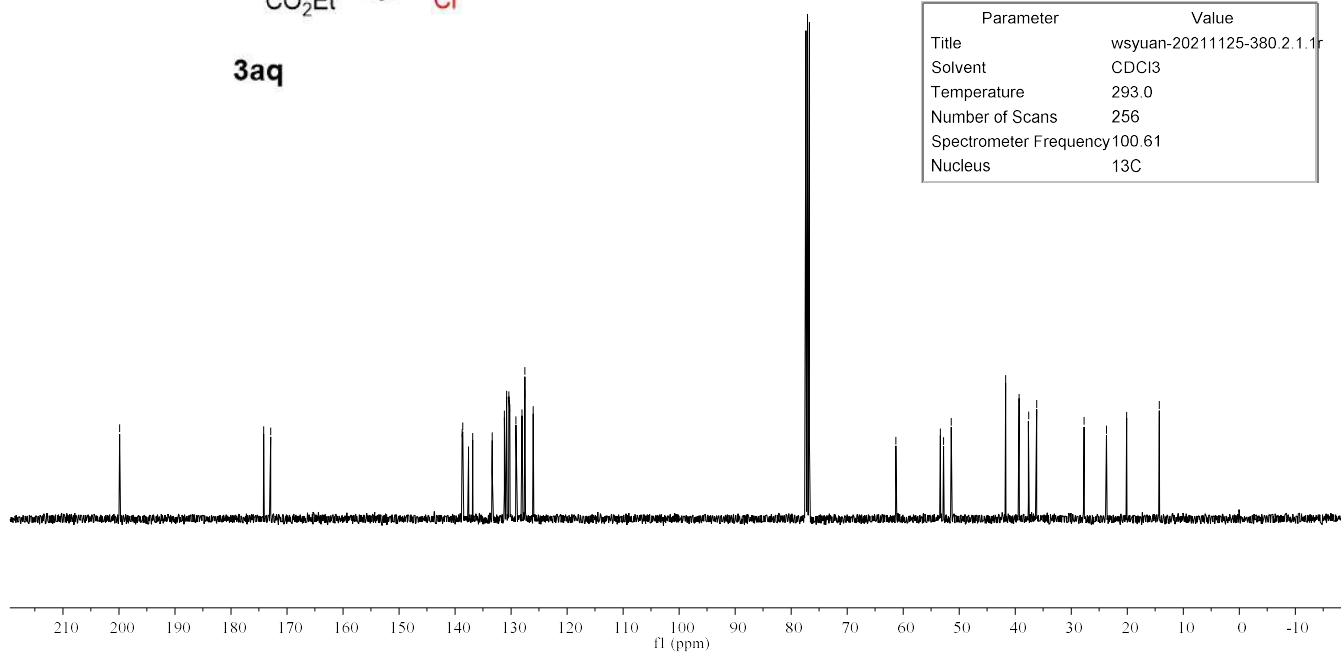

S140



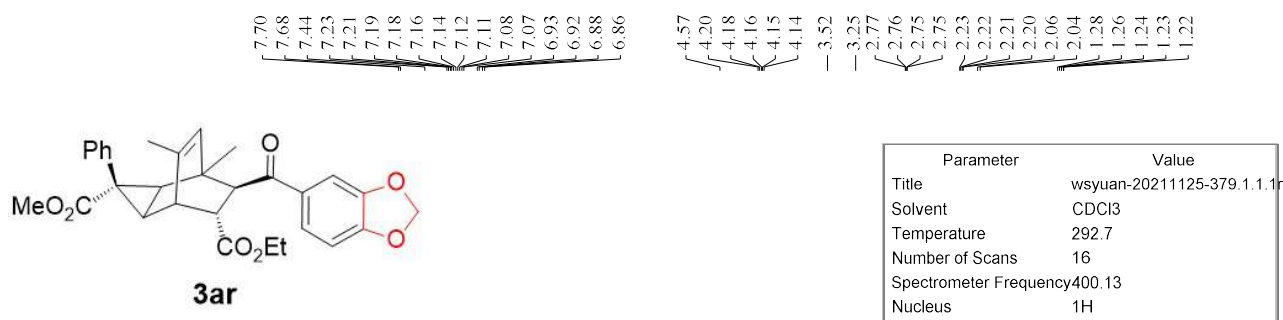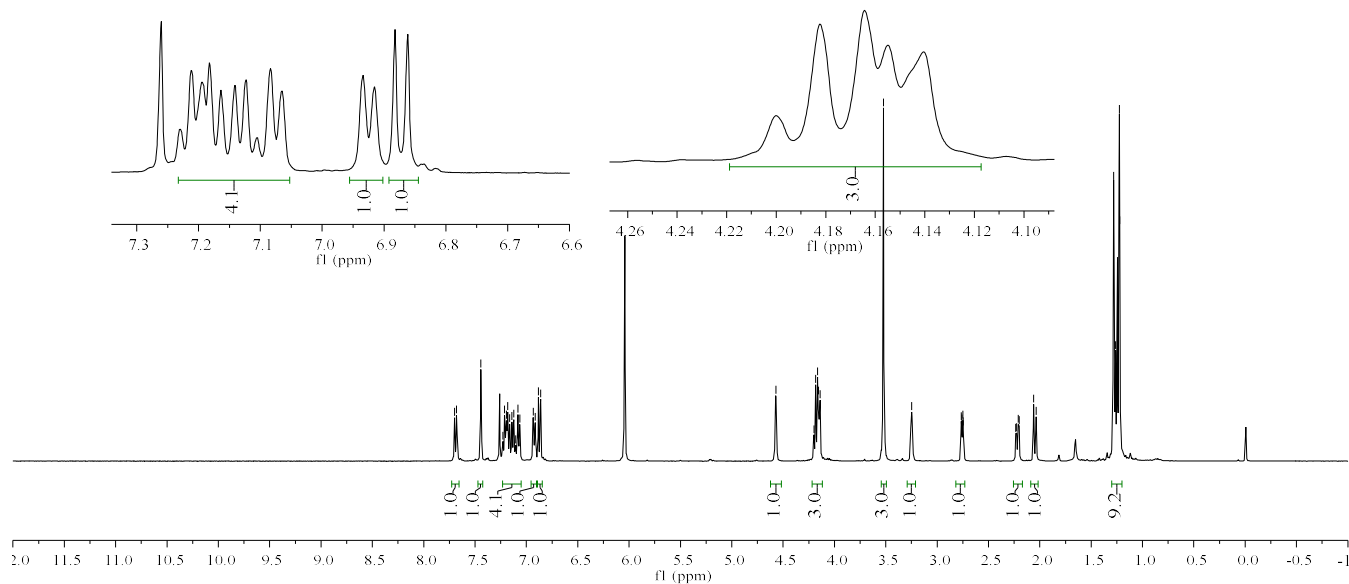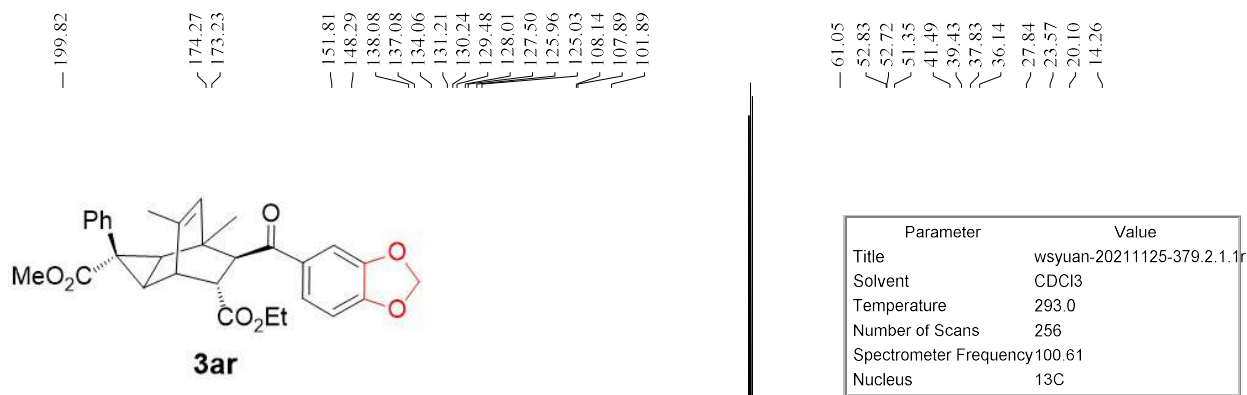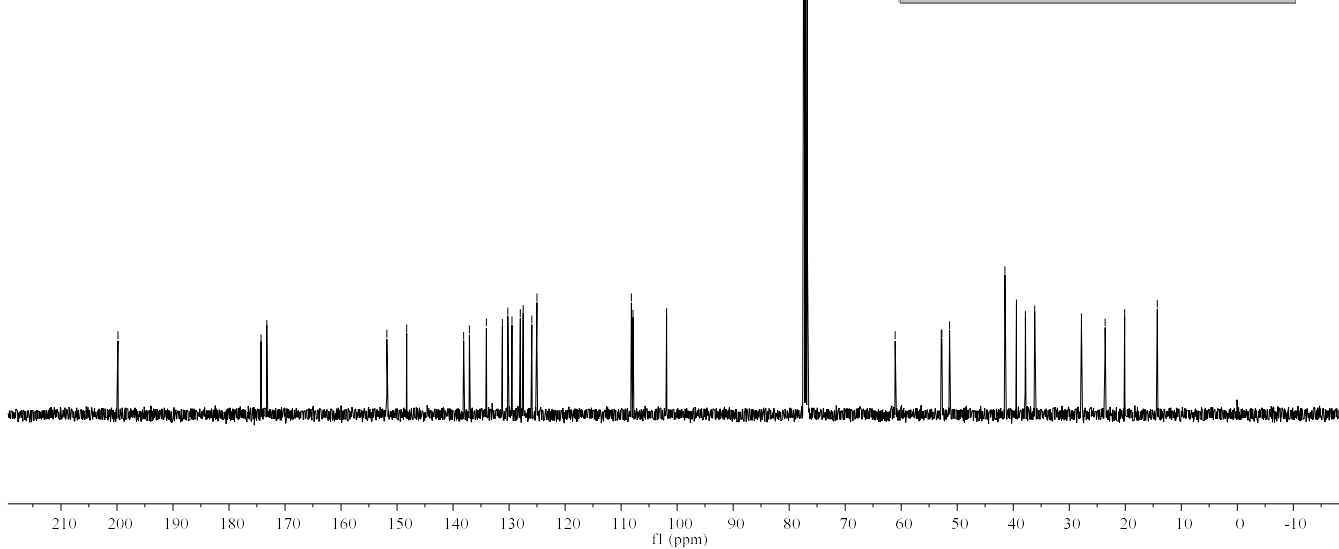

8.61  
8.04  
8.03  
8.01  
7.91  
7.89  
7.88  
7.63  
7.62  
7.60  
7.59  
7.59  
7.58  
7.57  
7.26  
7.24  
7.23  
7.22  
7.20  
7.19  
7.18  
7.15  
7.14  
7.13  
7.11  
7.10  
6.94  
6.93  
4.62  
4.45  
4.44  
4.21  
4.21  
4.20  
4.19  
4.18  
3.54  
3.31  
3.31  
3.31  
2.89  
2.88  
2.88  
2.87  
2.31  
2.30  
2.29  
2.29  
2.15  
2.14  
1.29  
1.27  
1.26  
1.24  
1.23  
1.22

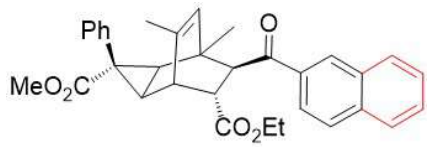

**3as**

| Parameter              | Value                      |
|------------------------|----------------------------|
| Title                  | as-20211208-wsy-390.1.1.1r |
| Solvent                | CDCl3                      |
| Temperature            | 291.5                      |
| Number of Scans        | 16                         |
| Spectrometer Frequency | 600.17                     |
| Nucleus                | 1H                         |

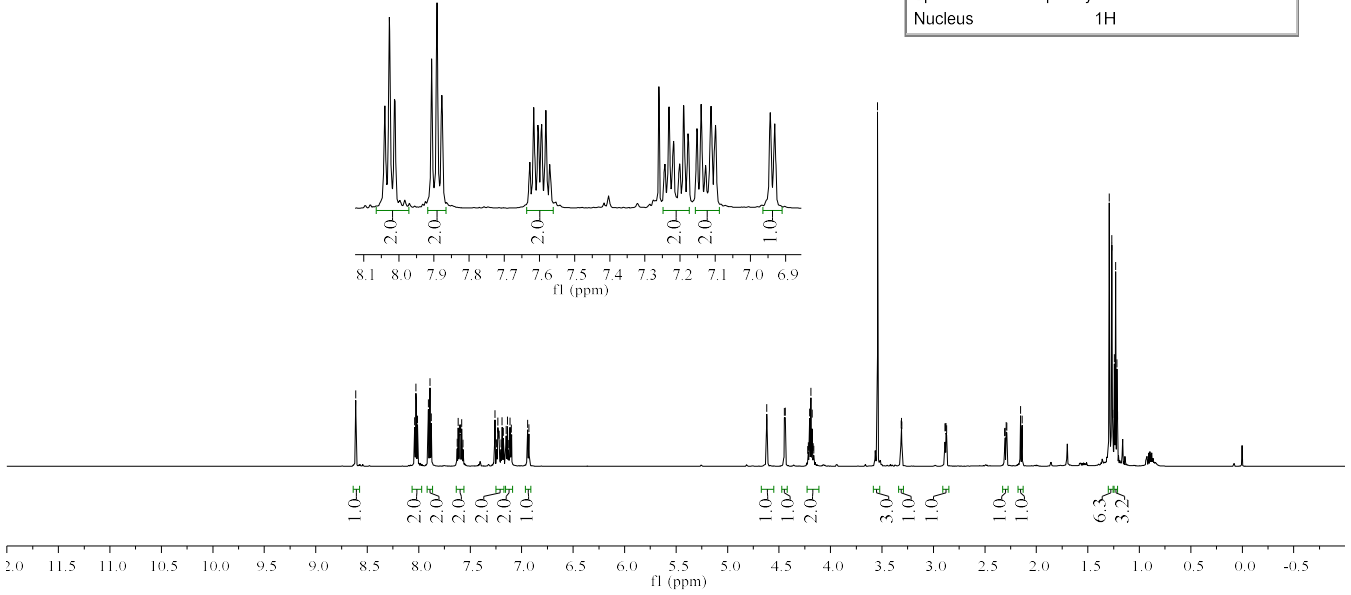

201.77  
174.33  
173.25  
138.37  
137.04  
136.52  
135.53  
132.57  
131.21  
130.36  
130.26  
129.78  
129.36  
128.59  
128.52  
128.01  
127.73  
127.51  
126.80  
125.96  
124.13  
61.08  
53.14  
52.75  
51.23  
41.66  
39.38  
37.95  
36.18  
27.95  
23.79  
20.15  
14.24

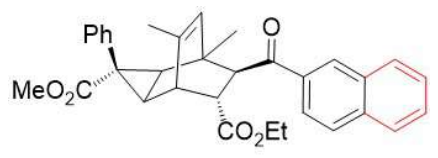

**3as**

| Parameter              | Value                      |
|------------------------|----------------------------|
| Title                  | as-20211208-wsy-390.2.1.1r |
| Solvent                | CDCl3                      |
| Temperature            | 292.4                      |
| Number of Scans        | 256                        |
| Spectrometer Frequency | 150.91                     |
| Nucleus                | 13C                        |

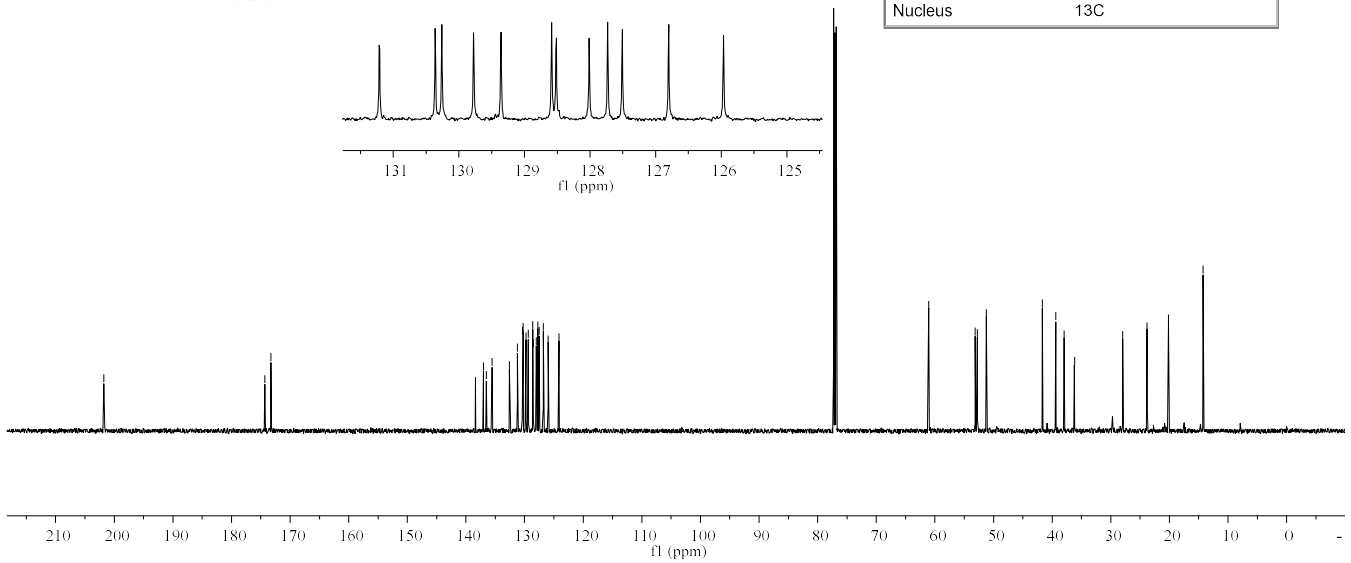

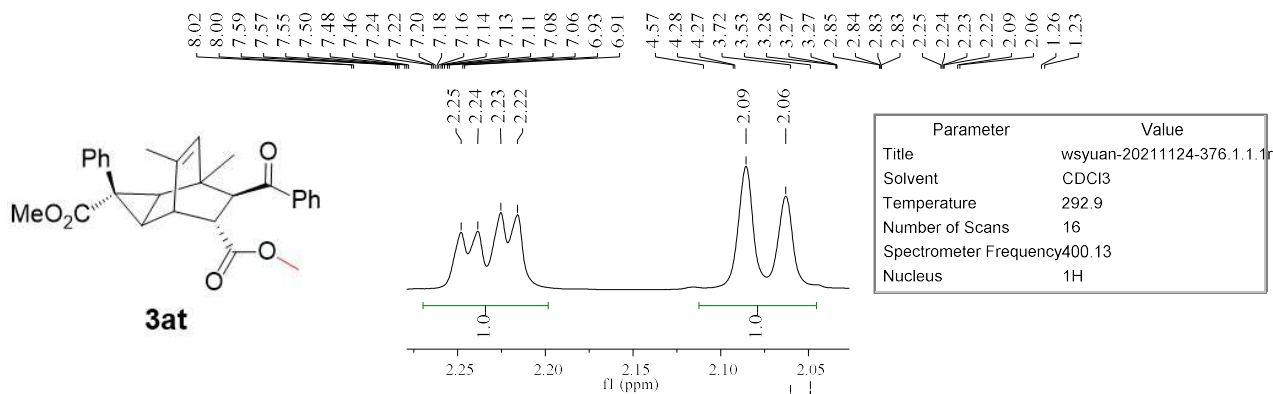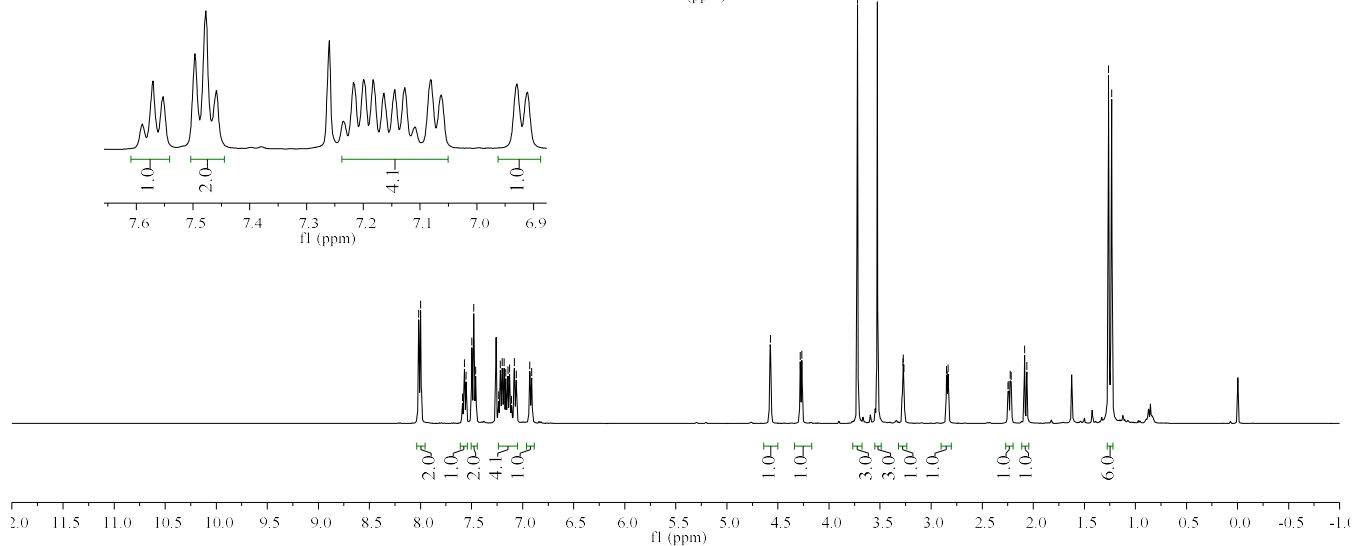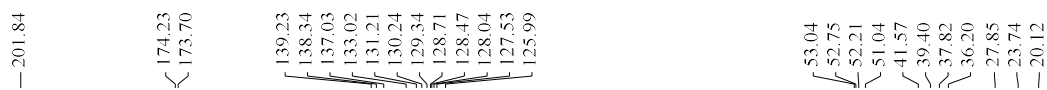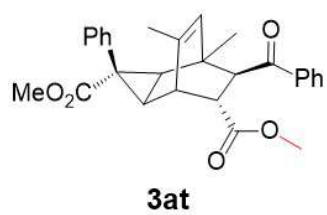

| Parameter              | Value                      |
|------------------------|----------------------------|
| Title                  | wsyuan-20211124-376.2.1.1r |
| Solvent                | CDCl3                      |
| Temperature            | 293.1                      |
| Number of Scans        | 256                        |
| Spectrometer Frequency | 100.61                     |
| Nucleus                | 13C                        |

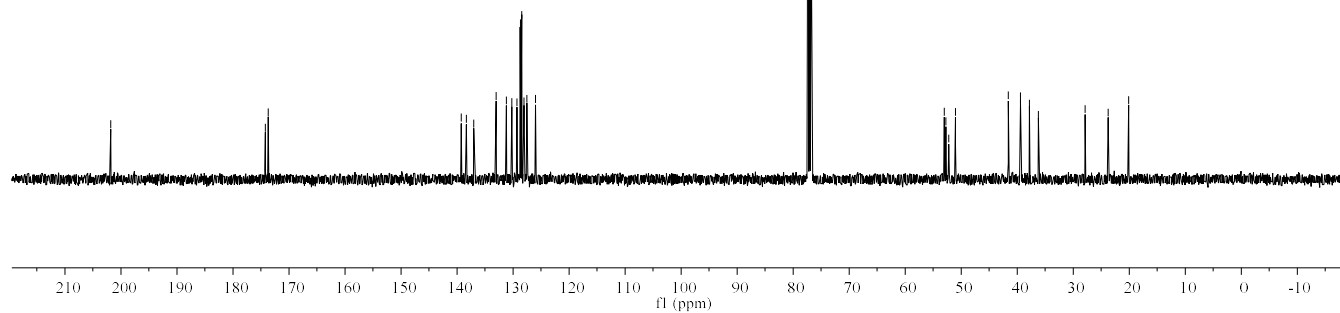



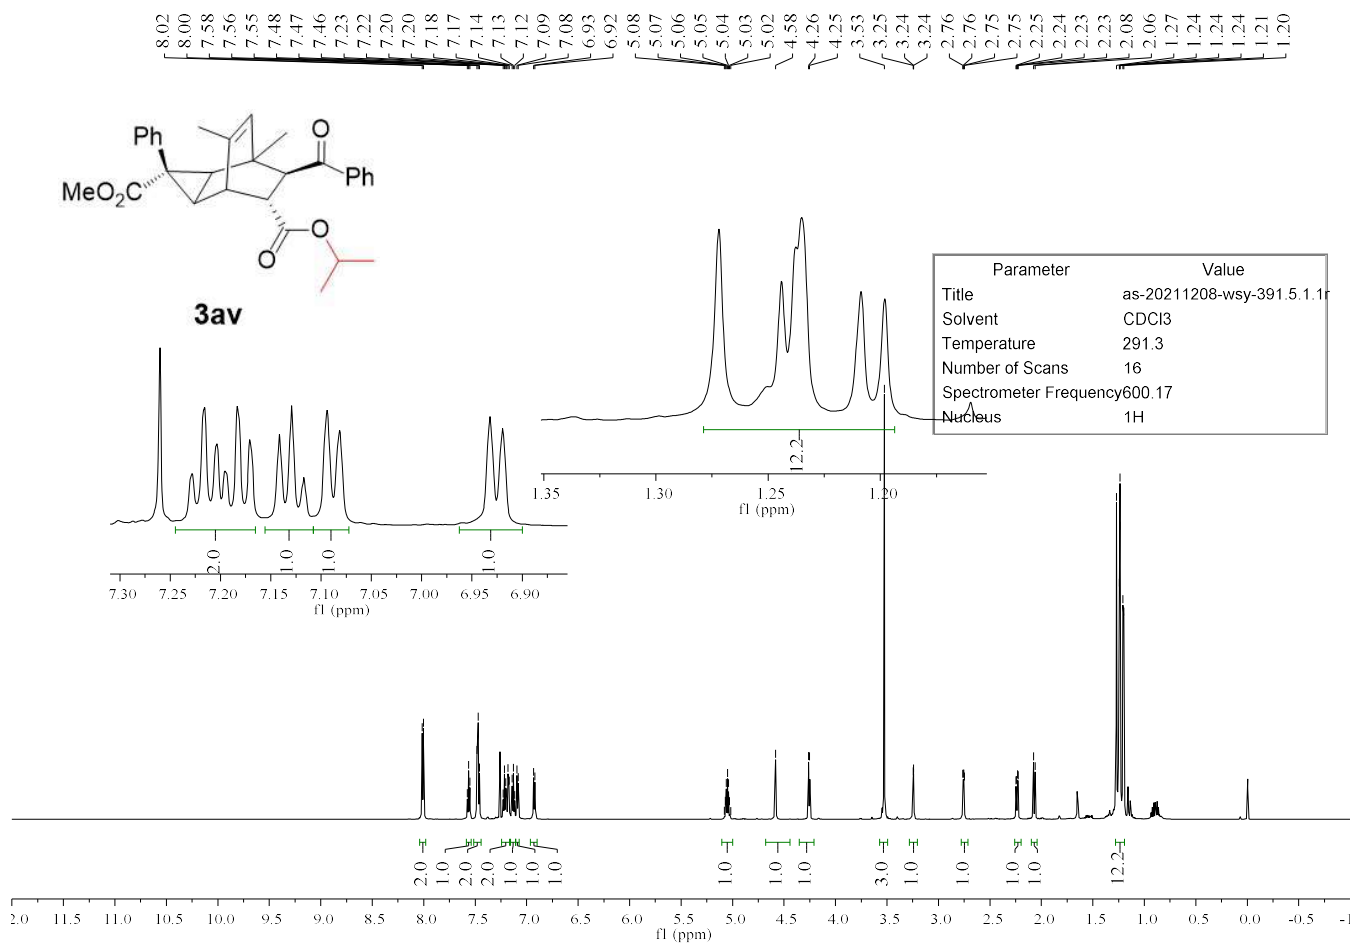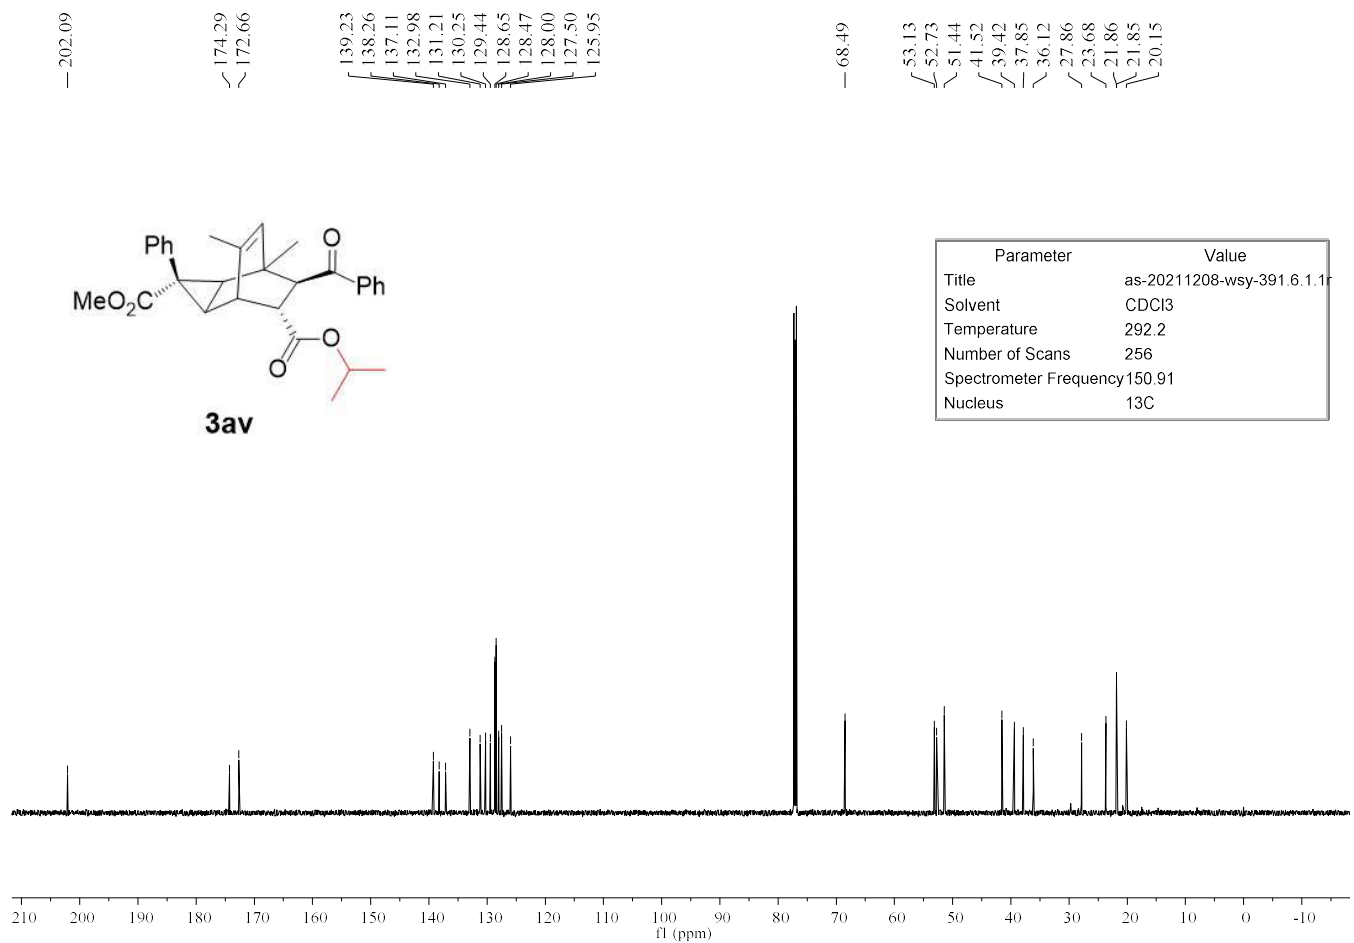

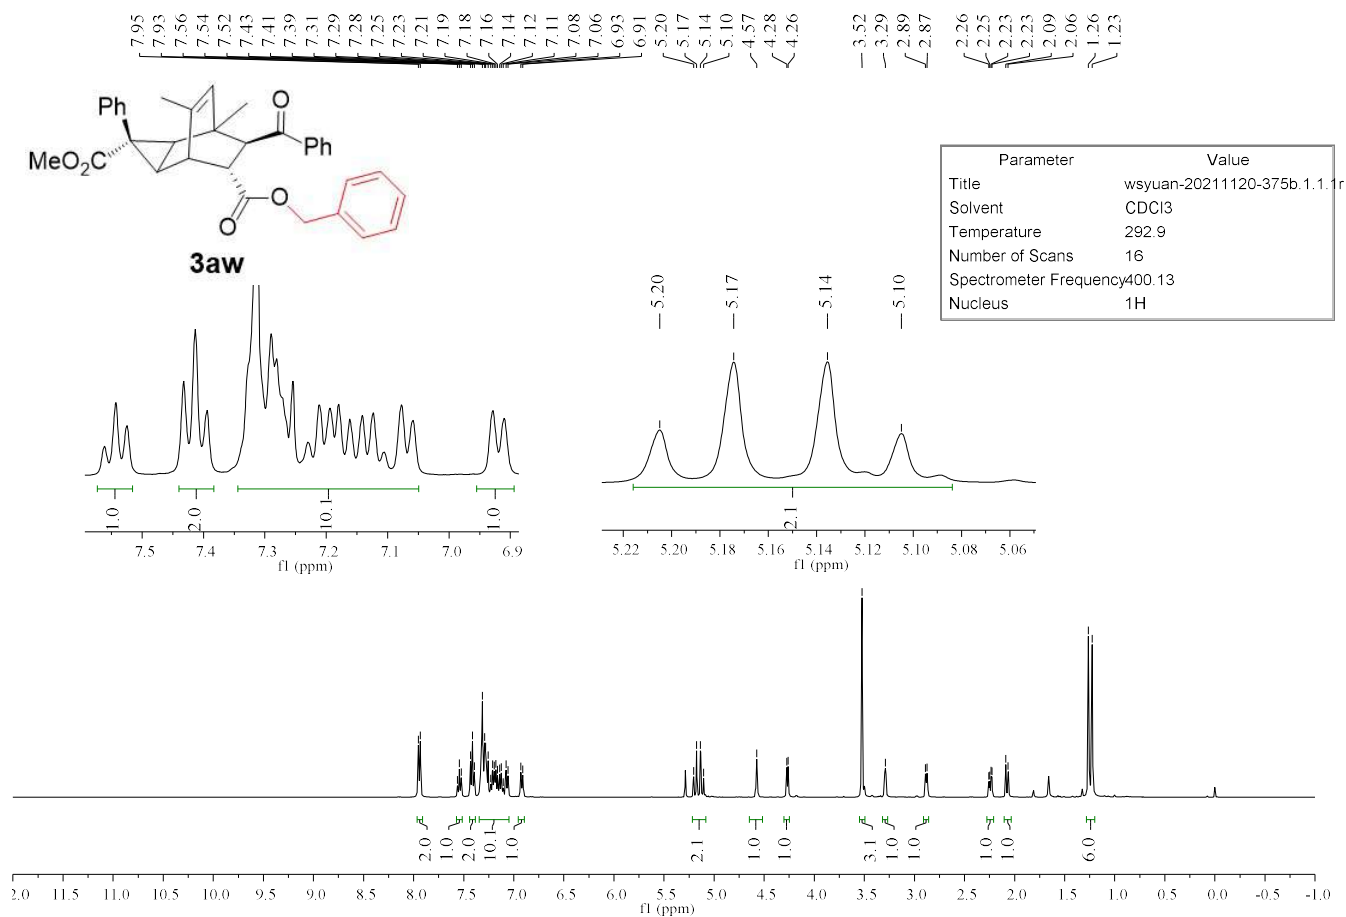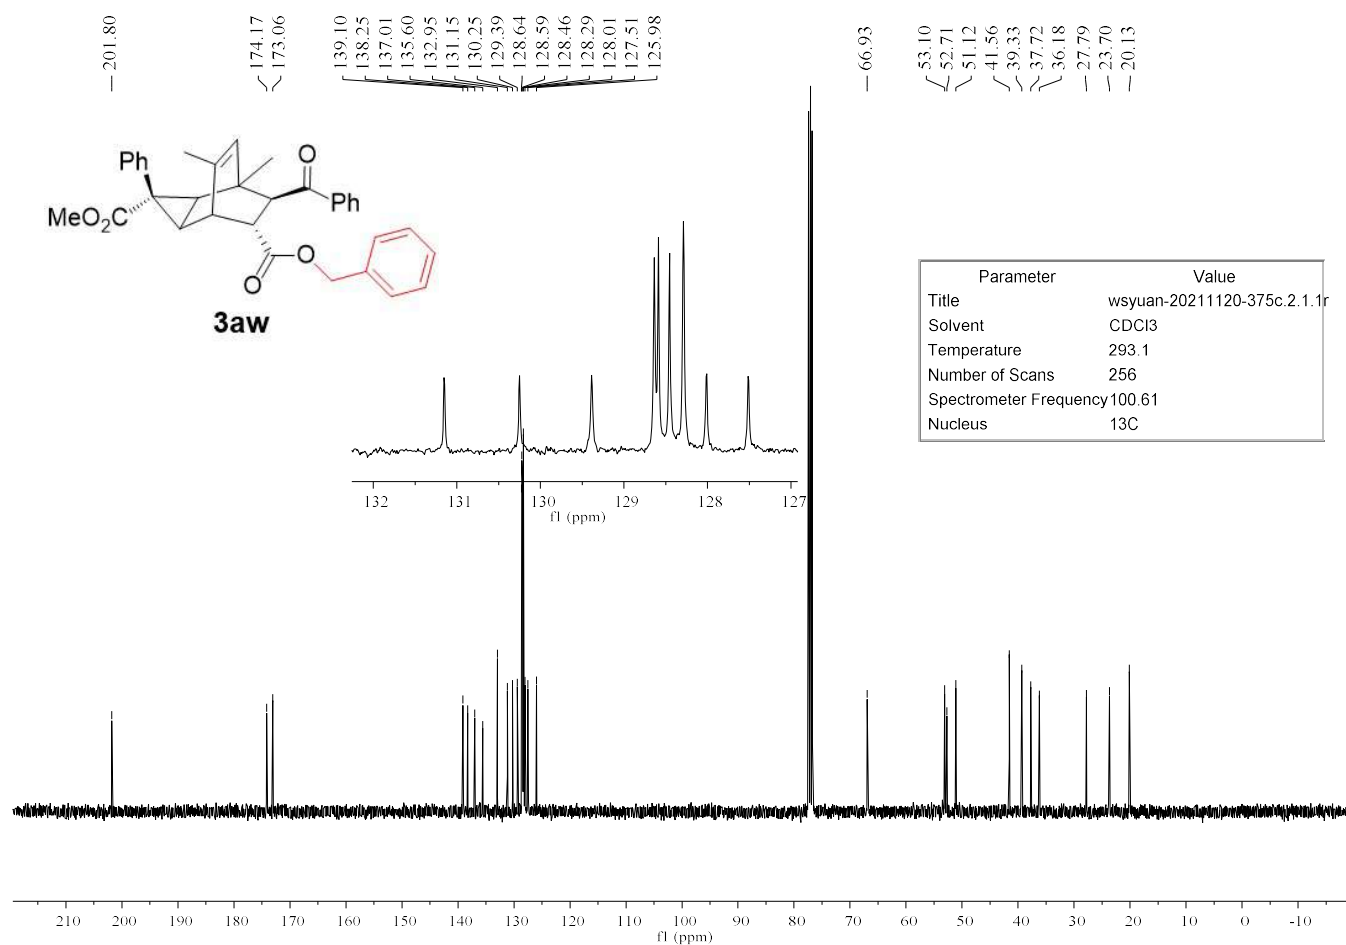

8.01  
8.00  
7.58  
7.57  
7.56  
7.49  
7.47  
7.46  
7.20  
7.19  
7.17  
7.16  
7.15  
7.01  
7.00  
7.00  
6.86  
6.86  
6.85  
6.84  
4.61  
4.26  
4.25  
4.20  
4.19  
4.18  
4.18  
4.17  
4.16  
4.15  
4.14  
4.14  
3.53  
3.26  
3.25  
3.25  
2.81  
2.80  
2.80  
2.25  
2.24  
2.23  
2.23  
2.08  
2.07  
1.28  
1.25  
1.24  
1.23  
1.21

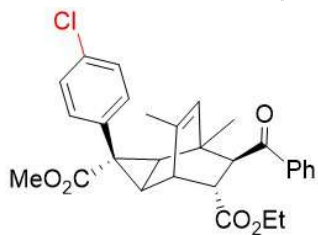

**3ba**

| Parameter              | Value                      |
|------------------------|----------------------------|
| Title                  | wangsy-20220114-407.1.1.1r |
| Solvent                | CDCl <sub>3</sub>          |
| Temperature            | 291.3                      |
| Number of Scans        | 16                         |
| Spectrometer Frequency | 600.17                     |
| Nucleus                | <sup>1</sup> H             |

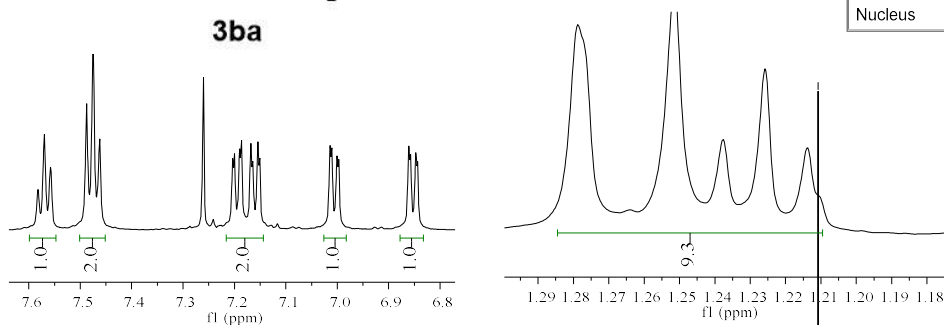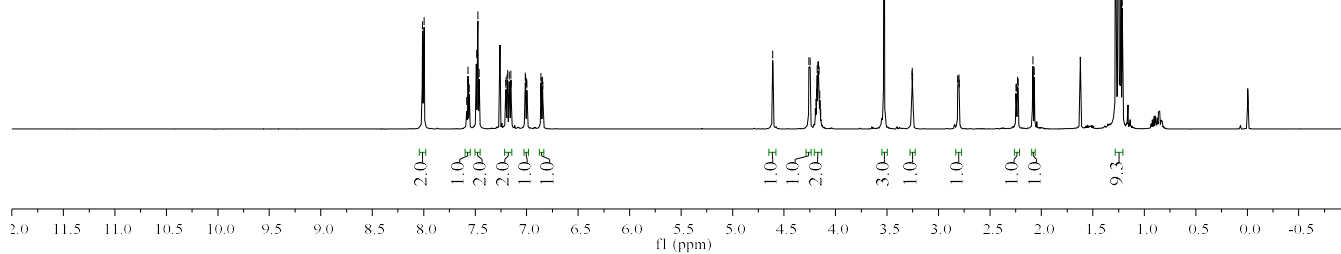

201.83  
173.81  
173.08  
139.15  
138.37  
135.85  
133.07  
132.49  
131.66  
131.39  
129.67  
128.70  
128.47  
128.12  
127.83  
61.13  
53.00  
52.80  
51.18  
41.50  
39.28  
37.90  
35.48  
27.93  
23.69  
20.21  
14.23

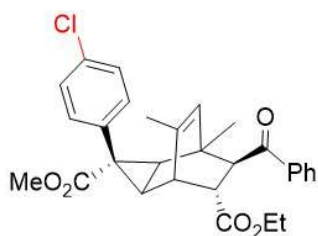

**3ba**

| Parameter              | Value                      |
|------------------------|----------------------------|
| Title                  | wangsy-20220114-407.2.1.1r |
| Solvent                | CDCl <sub>3</sub>          |
| Temperature            | 292.2                      |
| Number of Scans        | 256                        |
| Spectrometer Frequency | 150.91                     |
| Nucleus                | <sup>13</sup> C            |

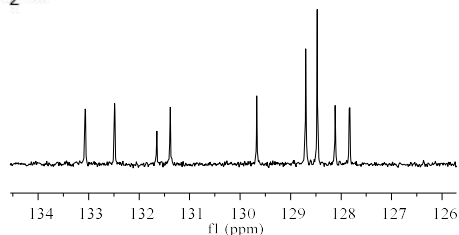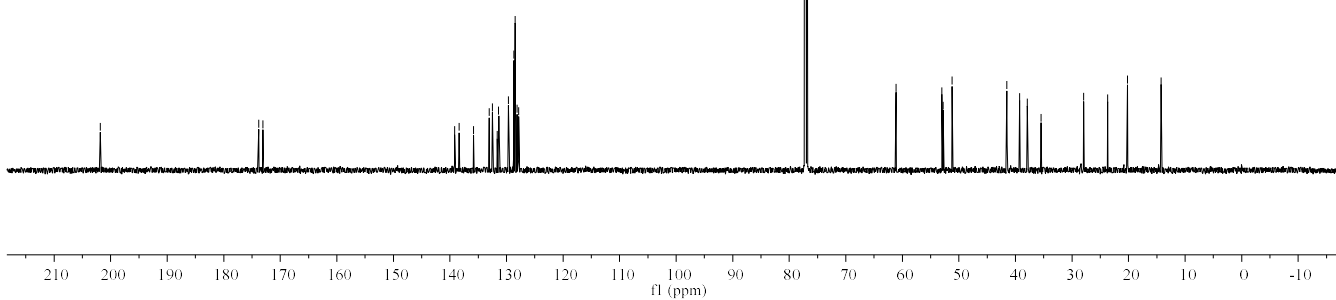

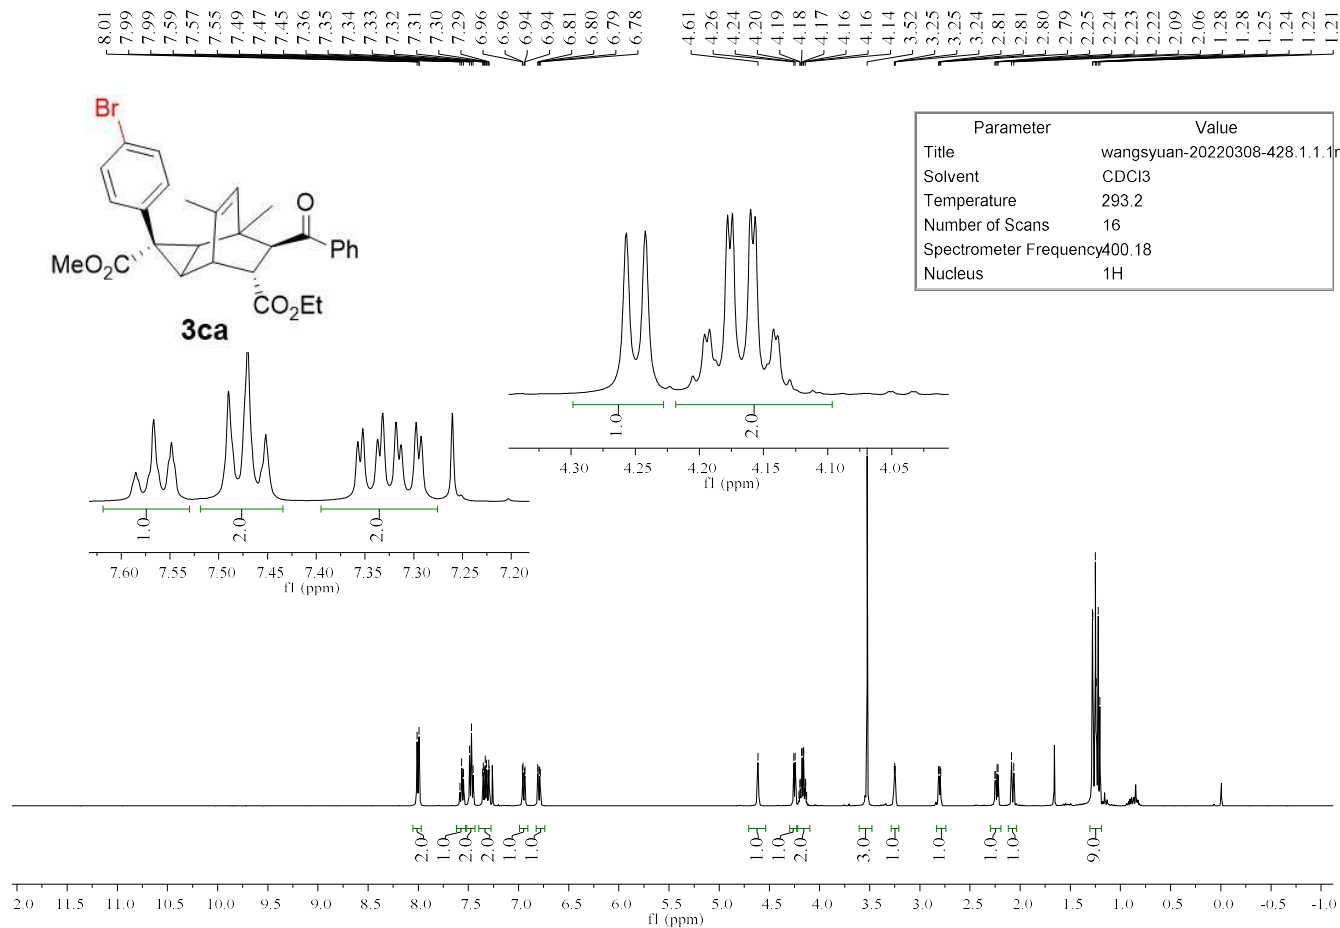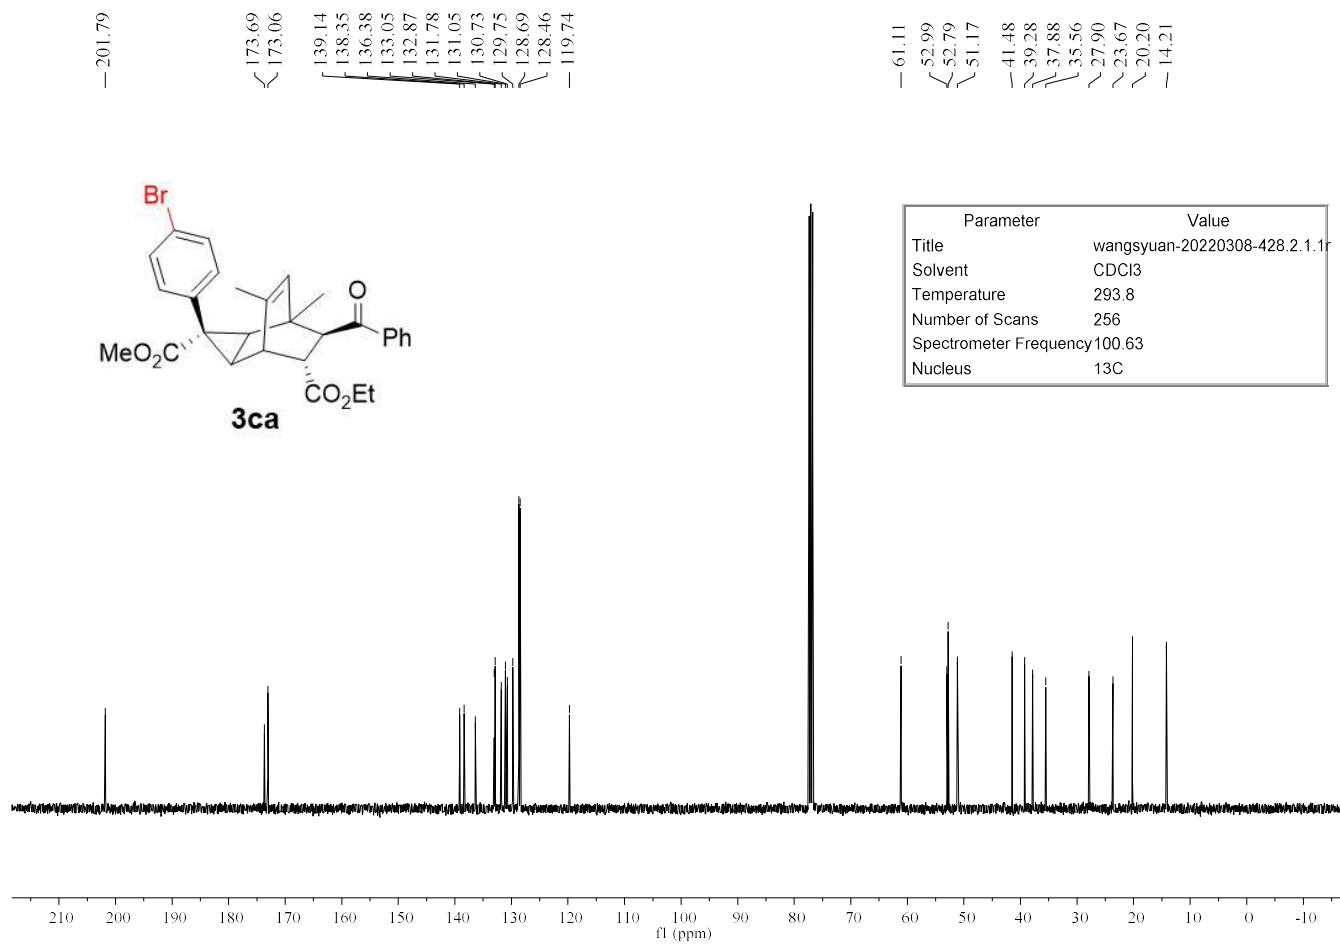



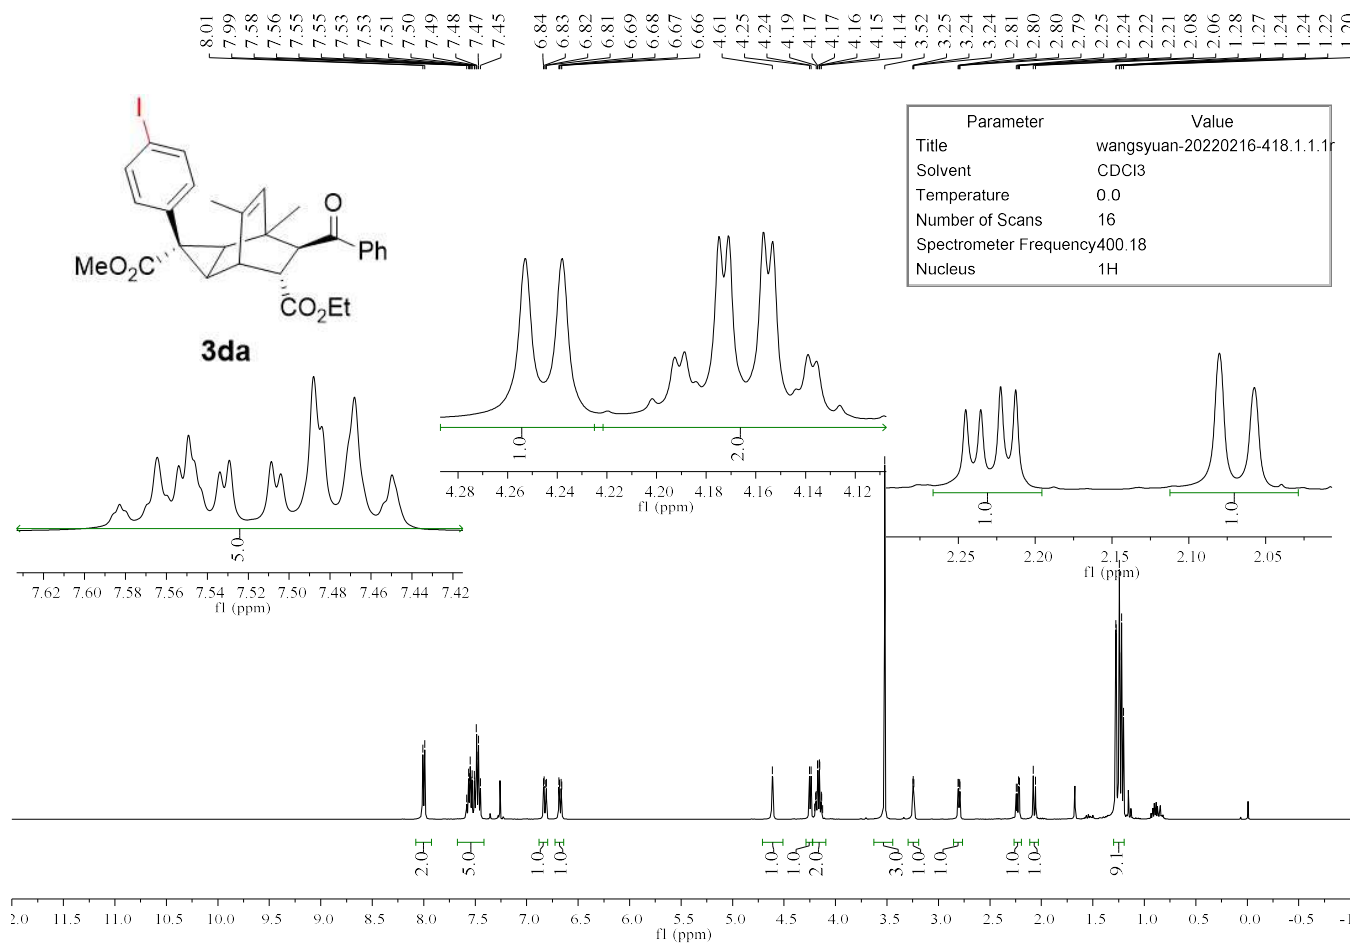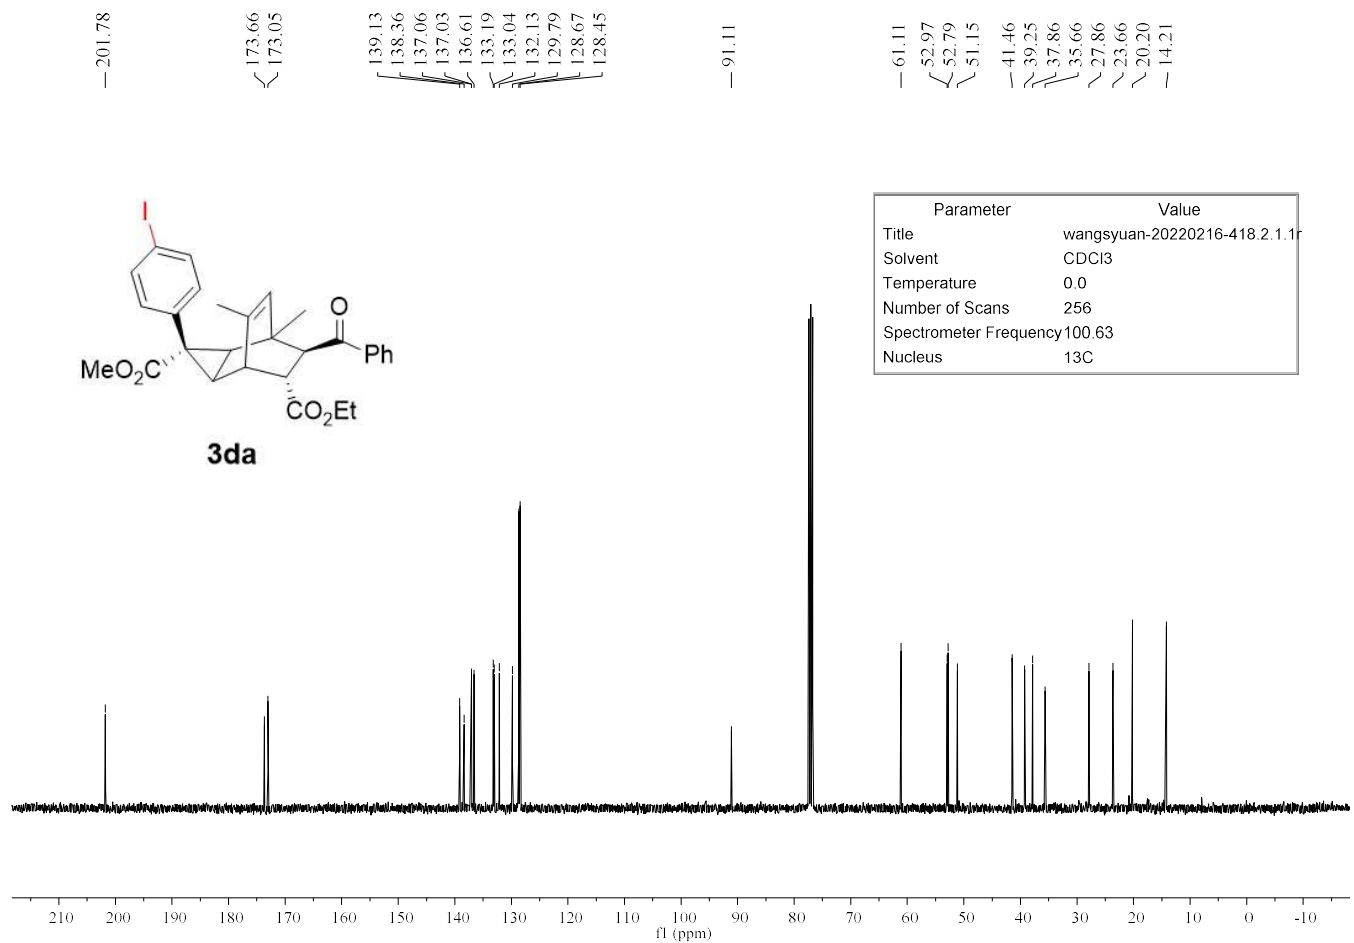

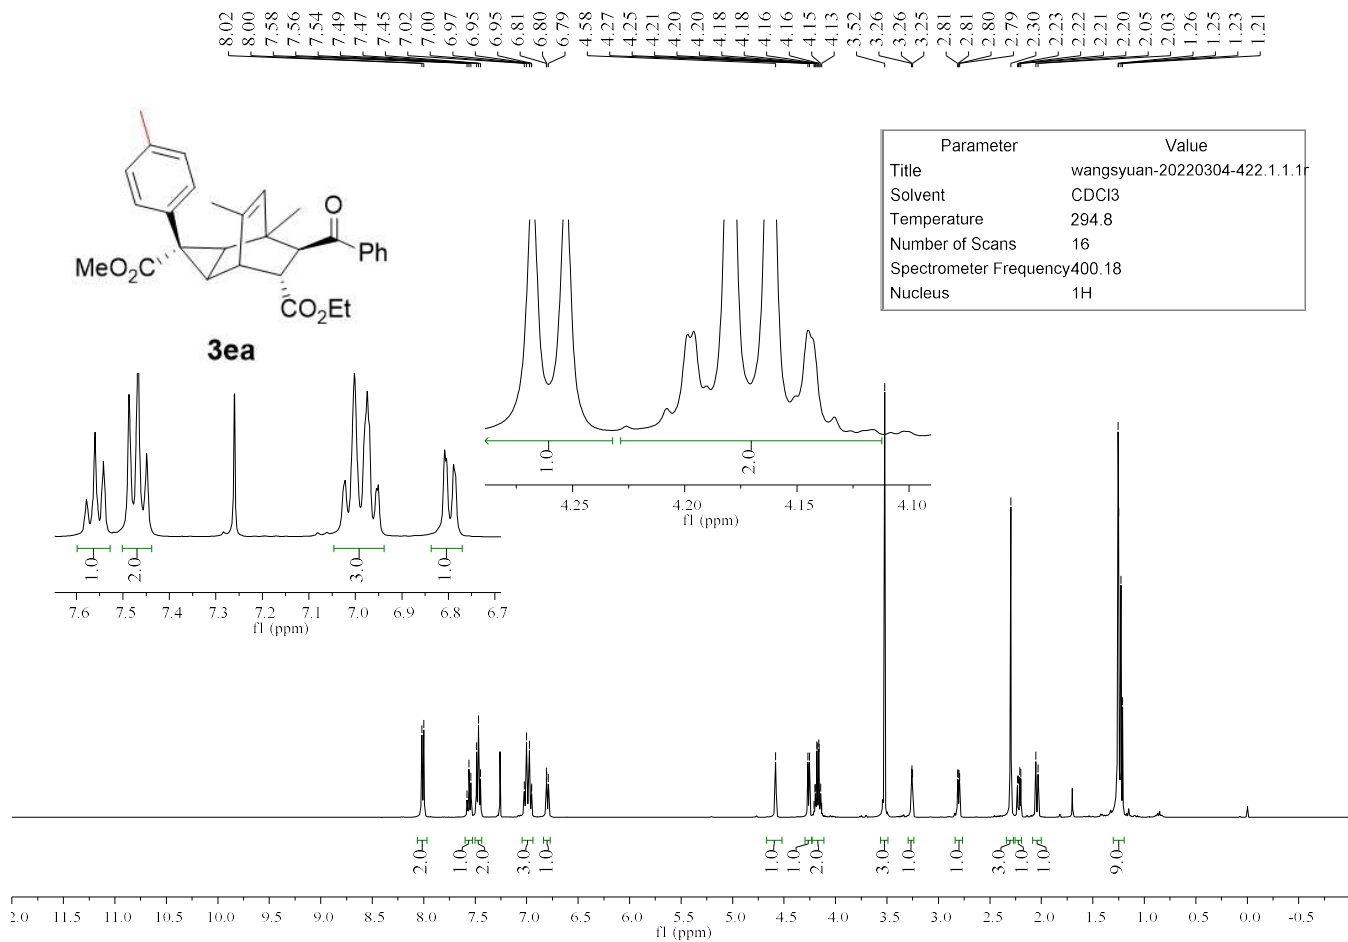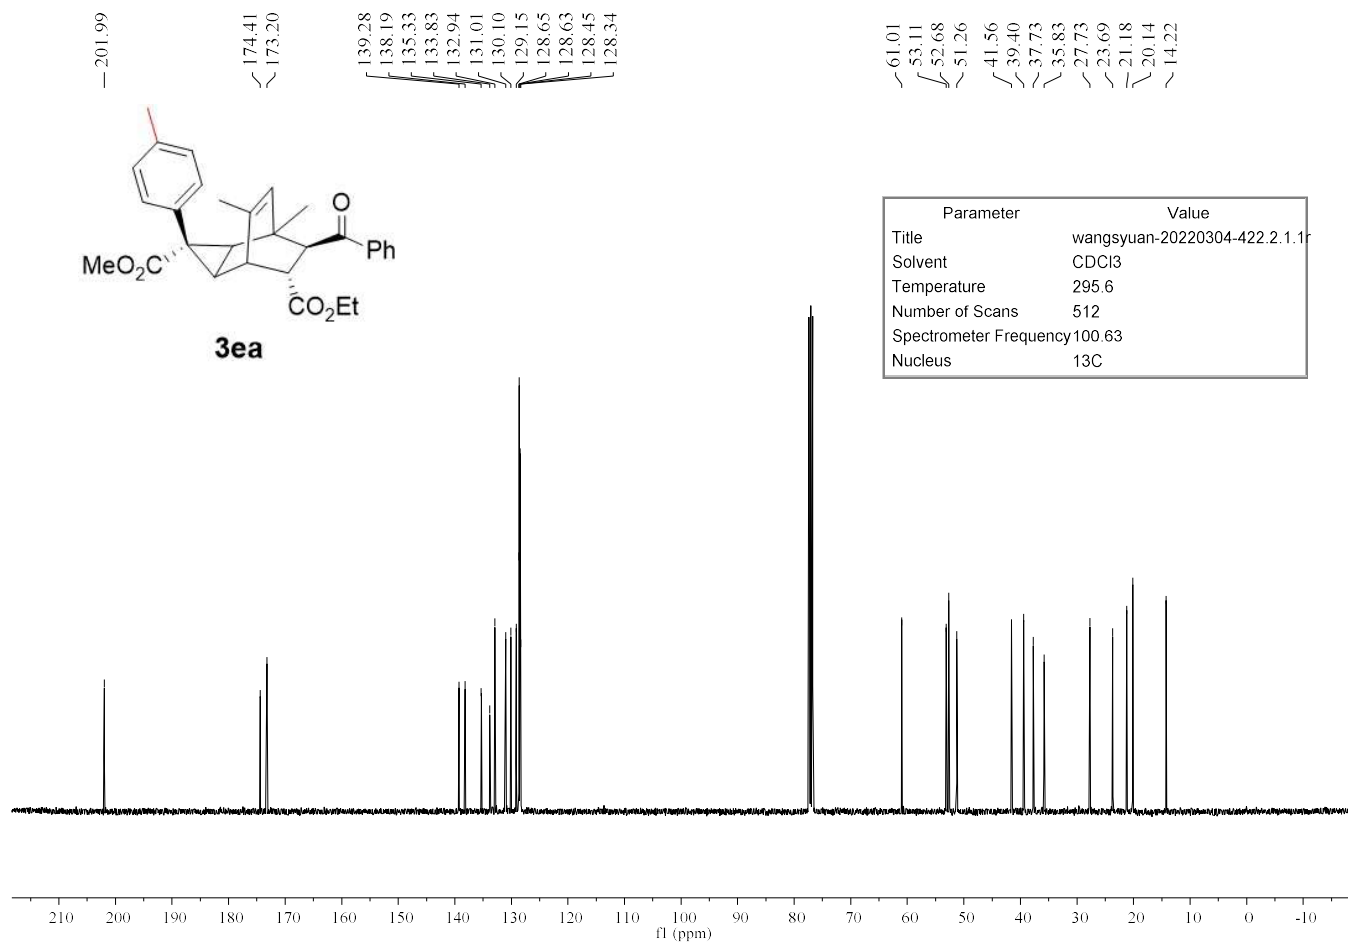

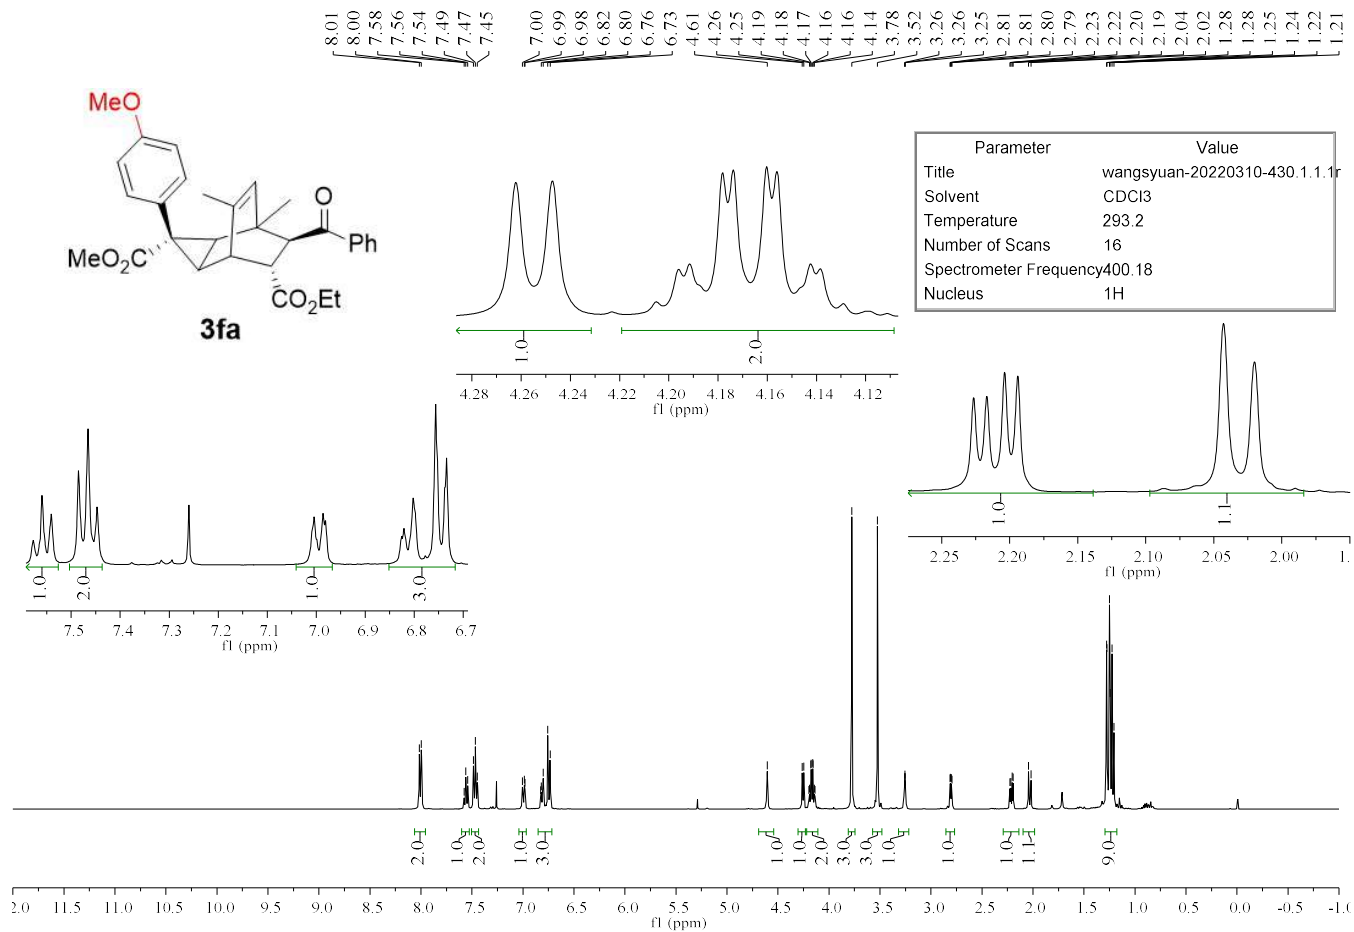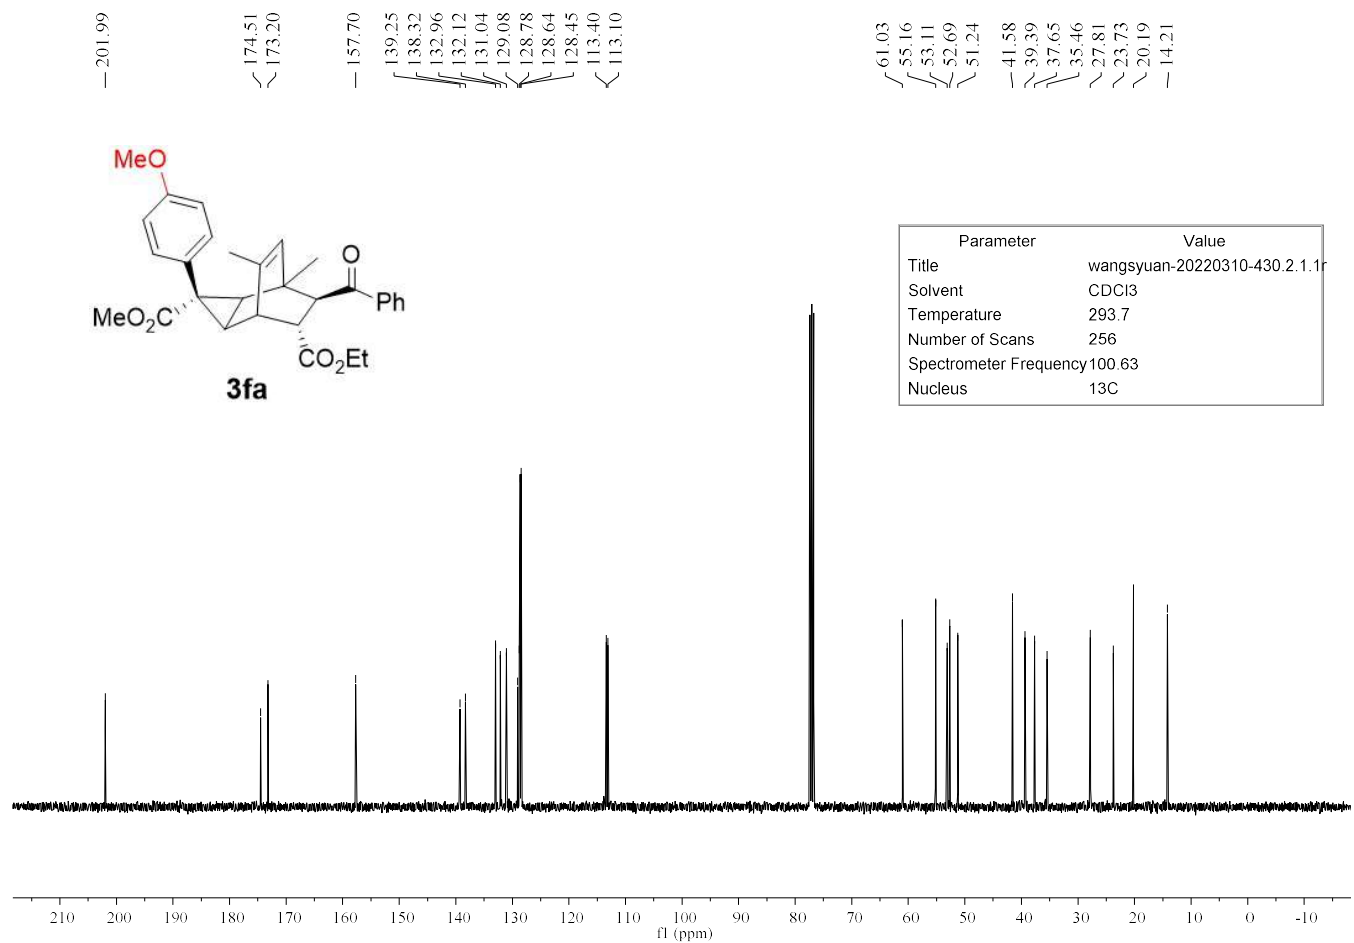



8.03  
8.02  
8.01  
8.01  
8.00  
8.00  
7.58  
7.56  
7.55  
7.49  
7.47  
7.45  
4.80  
4.63  
4.27  
4.26  
4.25  
4.24  
4.20  
4.18  
4.17  
4.16  
4.15  
4.13  
3.55  
3.53  
3.40  
3.39  
3.39  
3.31  
2.85  
2.84  
2.83  
2.83  
2.76  
2.75  
2.74  
2.74  
2.48  
2.47  
2.46  
2.45  
2.30  
2.28  
2.25  
2.24  
2.23  
2.22  
2.10  
2.08  
1.33  
1.31  
1.30  
1.28  
1.27  
1.25  
1.23  
1.21  
1.19

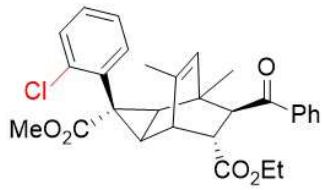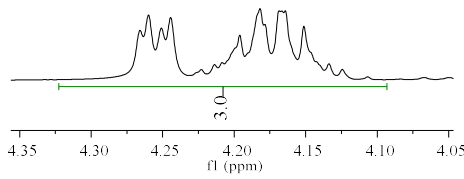

| Parameter              | Value                     |
|------------------------|---------------------------|
| Title                  | as-20220317-WSY-434.1.1.1 |
| Solvent                | CDCl3                     |
| Temperature            | 293.4                     |
| Number of Scans        | 16                        |
| Spectrometer Frequency | 400.18                    |
| Nucleus                | 1H                        |

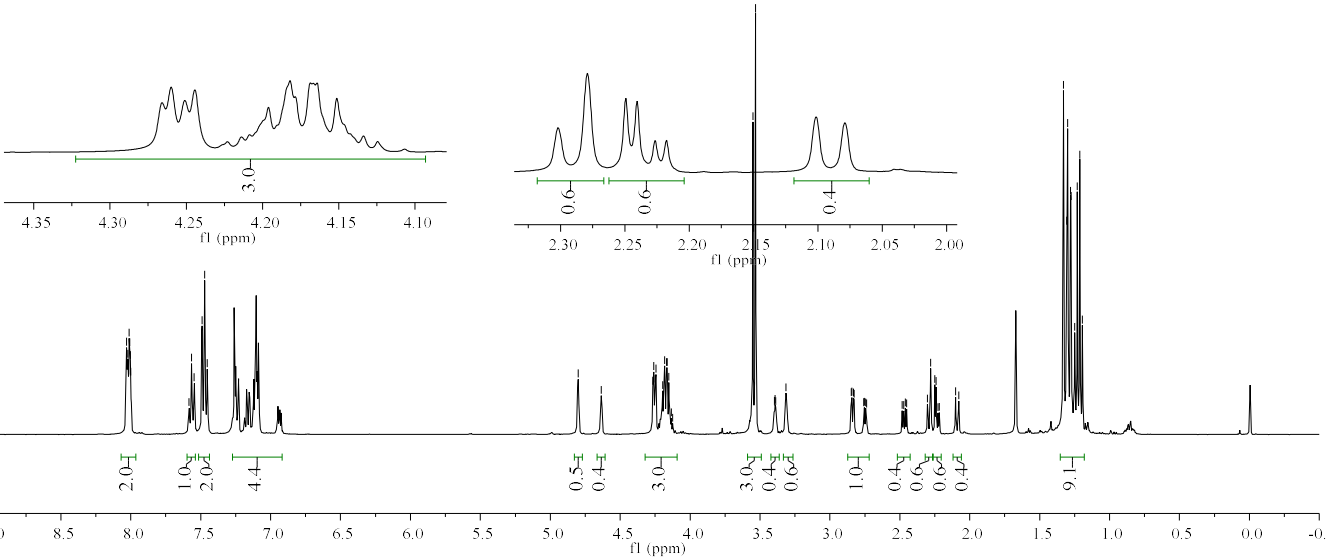

202.35  
202.10  
173.39  
173.25  
173.08  
140.11  
139.25  
139.17  
138.20  
135.84  
135.66  
135.22  
134.70  
133.82  
133.04  
133.00  
132.74  
129.81  
129.55  
129.11  
128.69  
128.65  
128.49  
127.53  
127.45  
127.39  
126.17  
125.77  
61.10  
53.32  
52.83  
52.62  
51.36  
51.32  
41.83  
41.62  
40.40  
39.86  
39.78  
38.43  
34.49  
34.32  
30.54  
28.11  
23.78  
23.03  
20.11  
19.61  
14.22  
14.19

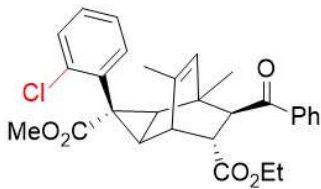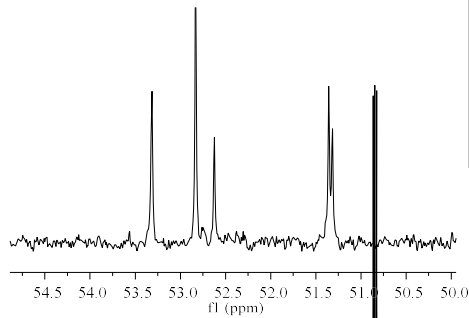

| Parameter              | Value                     |
|------------------------|---------------------------|
| Title                  | as-20220317-WSY-434.2.1.1 |
| Solvent                | CDCl3                     |
| Temperature            | 294.1                     |
| Number of Scans        | 256                       |
| Spectrometer Frequency | 100.63                    |
| Nucleus                | 13C                       |

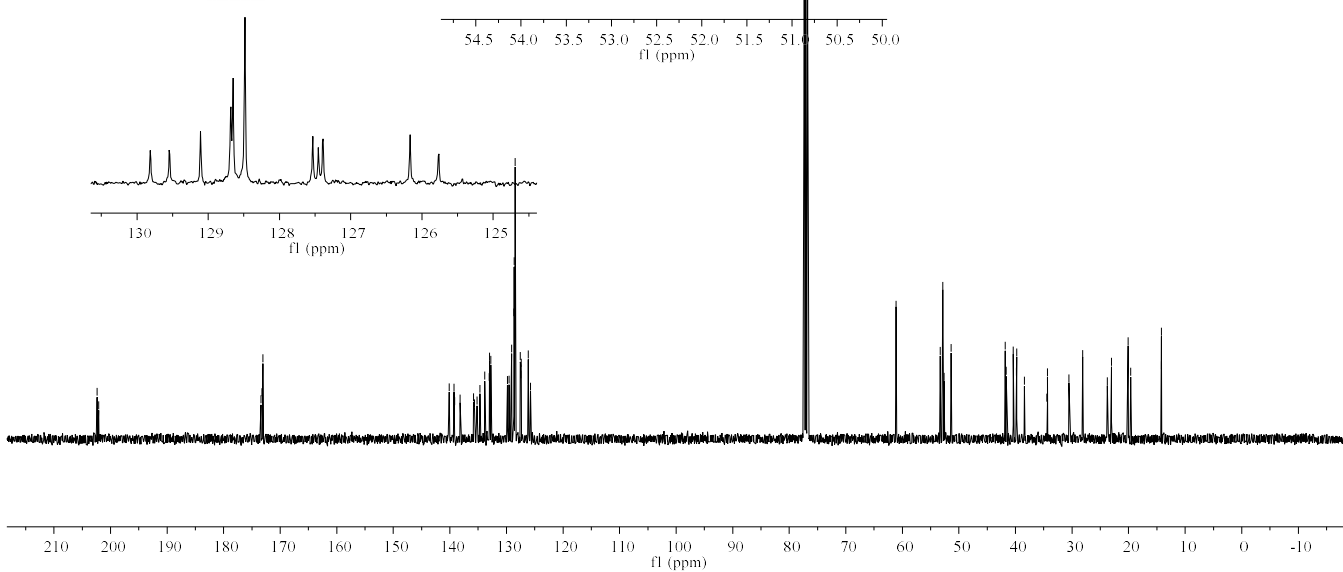



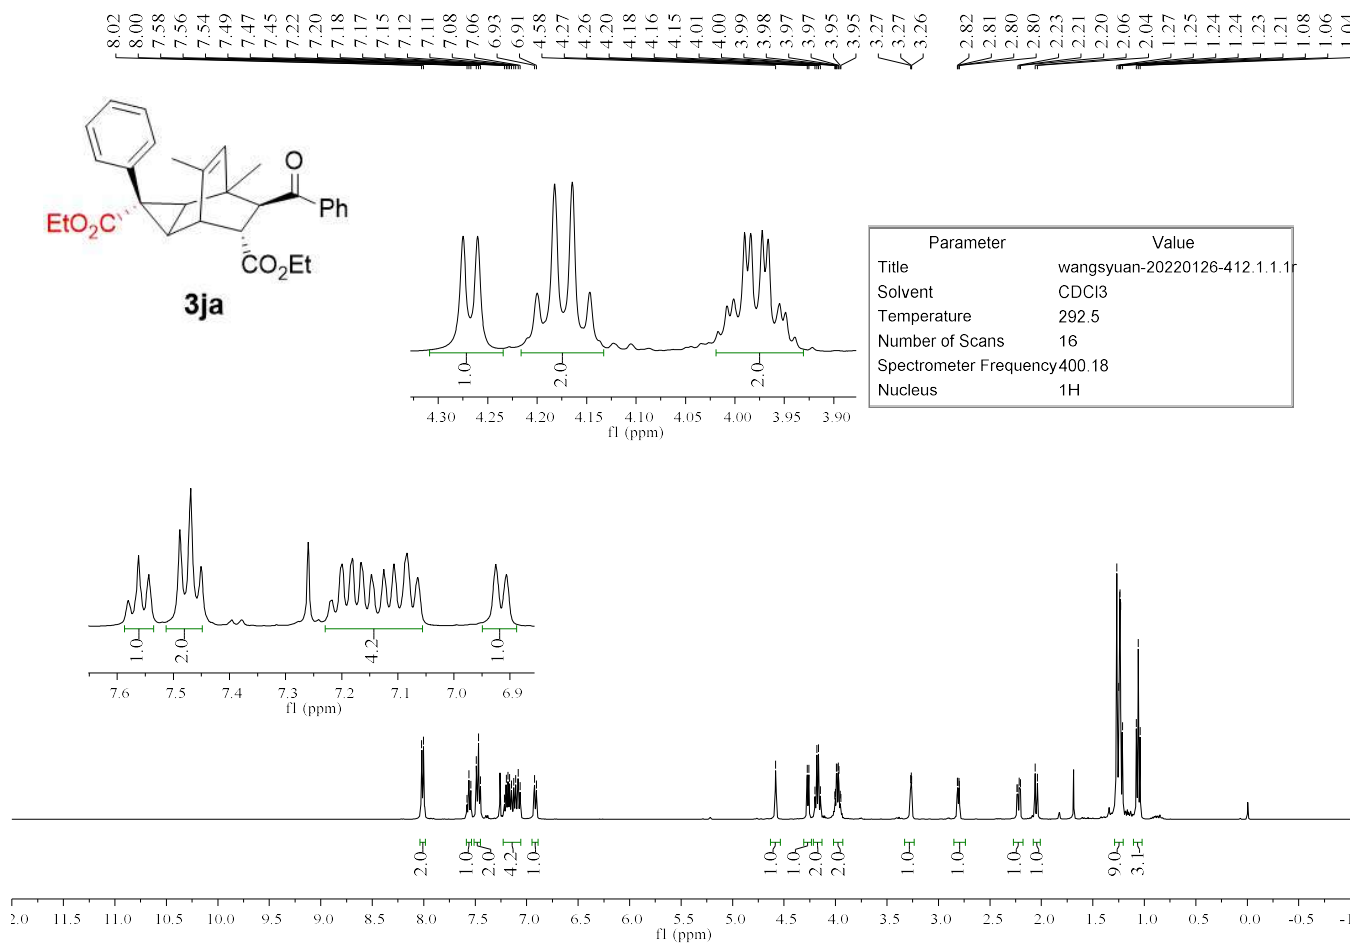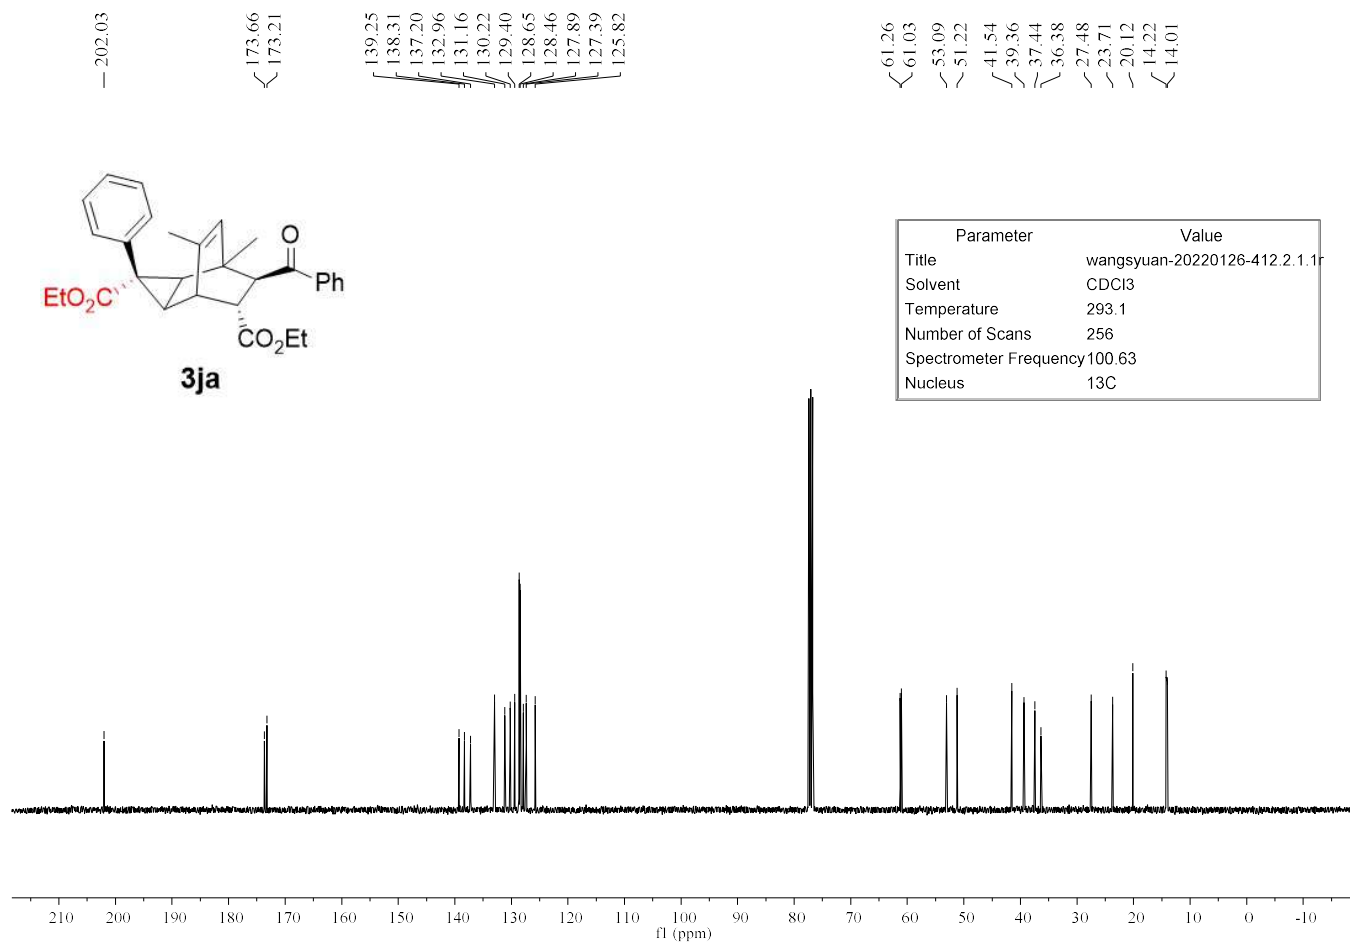

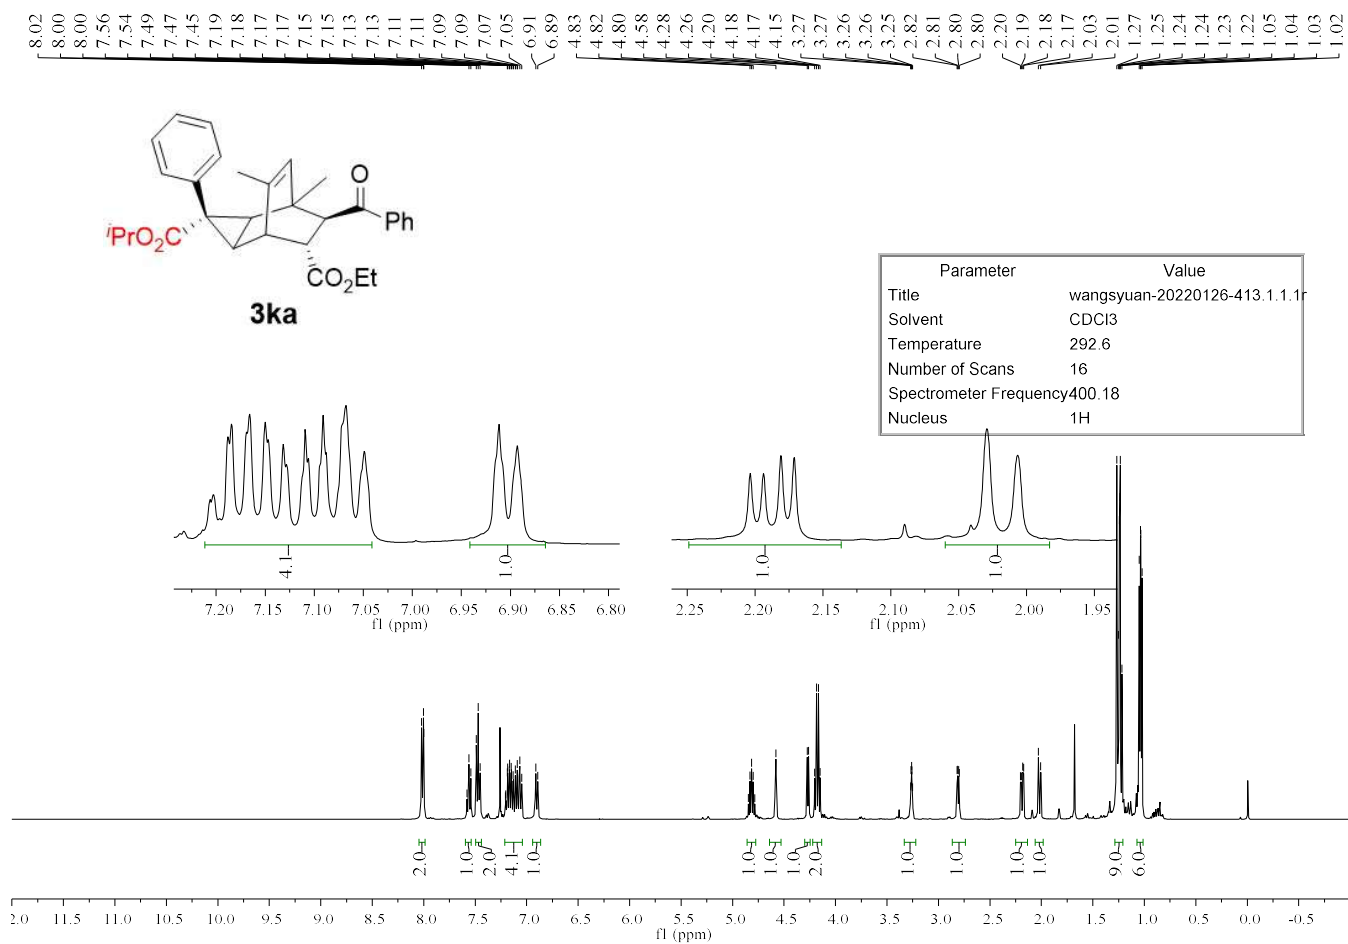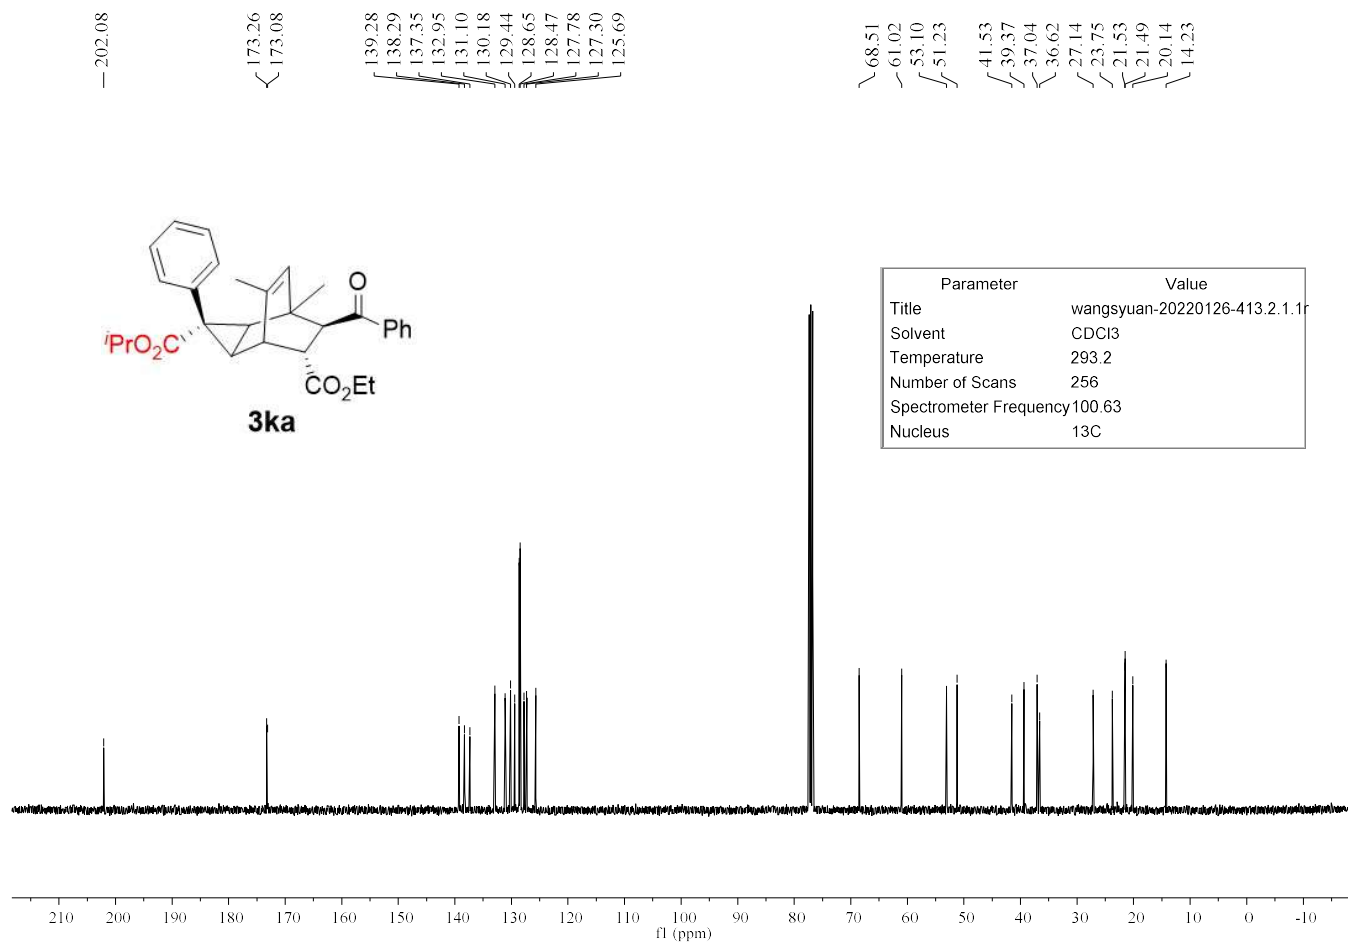



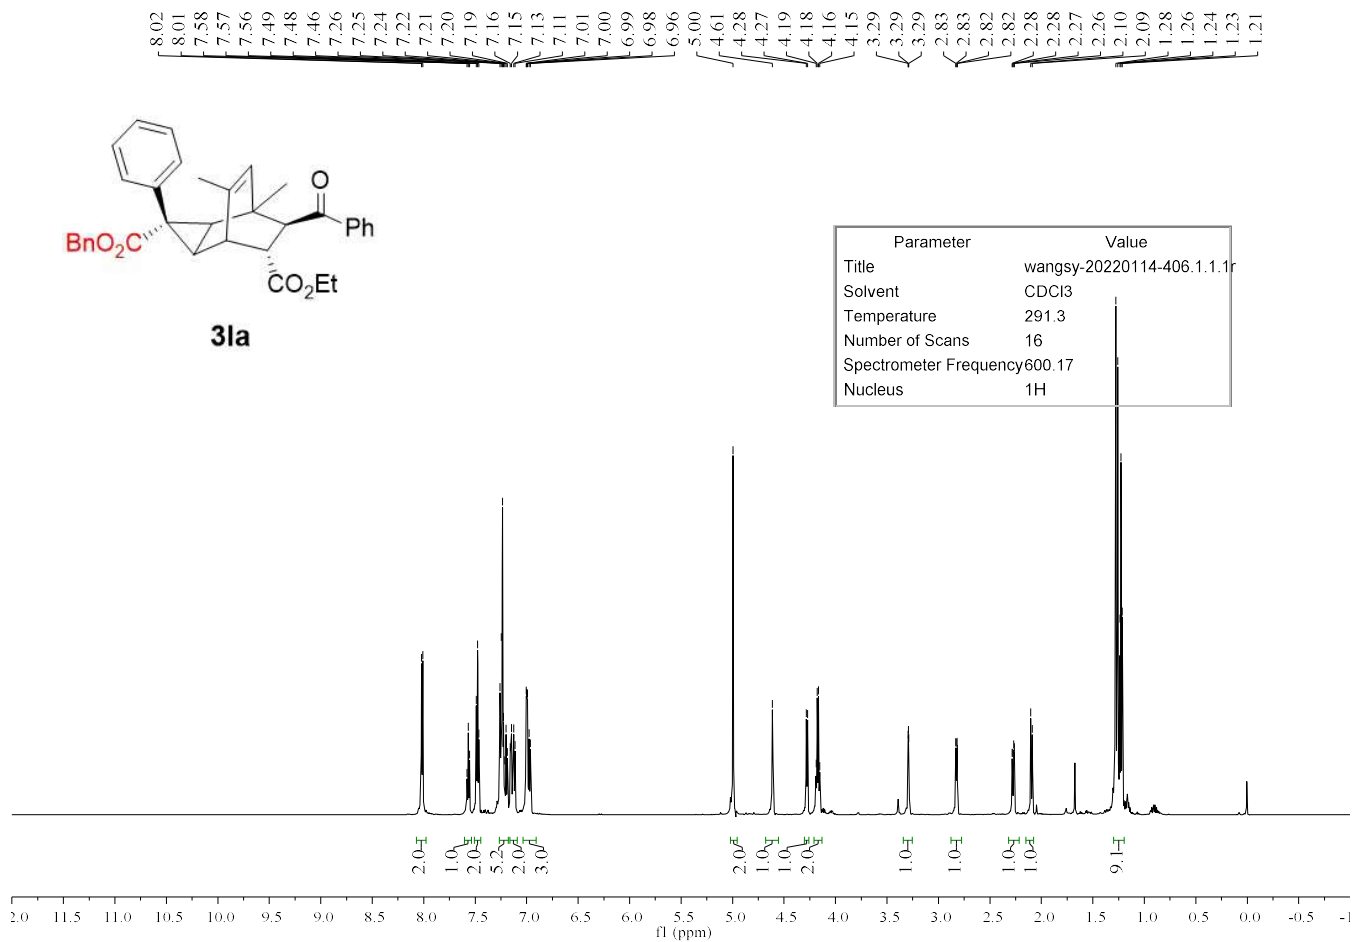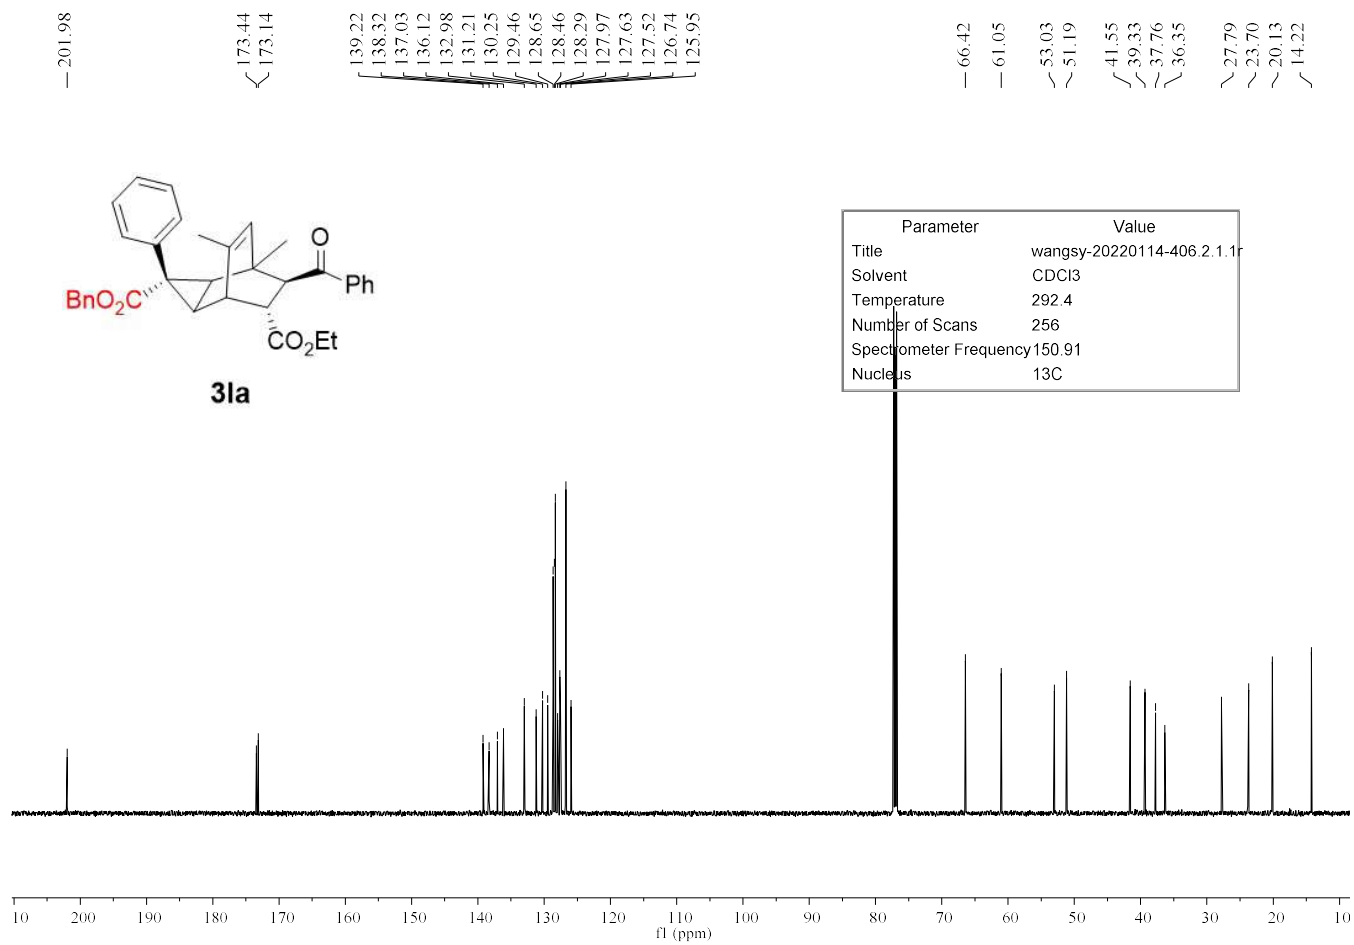

8.01  
8.00  
7.99  
7.59  
7.57  
7.55  
7.49  
7.47  
7.45  
7.05  
7.05  
7.04  
7.03  
7.02  
6.93  
6.92  
6.92  
6.91  
6.90  
6.90  
6.89  
6.89  
6.88  
6.88  
6.87

4.60  
4.26  
4.25  
4.19  
4.18  
4.18  
4.16  
4.16  
4.15  
4.14  
3.53  
3.26  
3.26  
3.25  
2.81  
2.81  
2.80  
2.79  
2.25  
2.24  
2.24  
2.23  
2.22  
2.08  
2.06  
1.27  
1.27  
1.25  
1.24  
1.23  
1.21

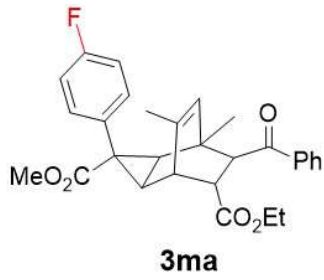

| Parameter              | Value                         |
|------------------------|-------------------------------|
| Title                  | wangsyuan-20220308-427.1.1.1r |
| Solvent                | CDCl3                         |
| Temperature            | 293.1                         |
| Number of Scans        | 16                            |
| Spectrometer Frequency | 400.18                        |
| Nucleus                | <sup>1</sup> H                |

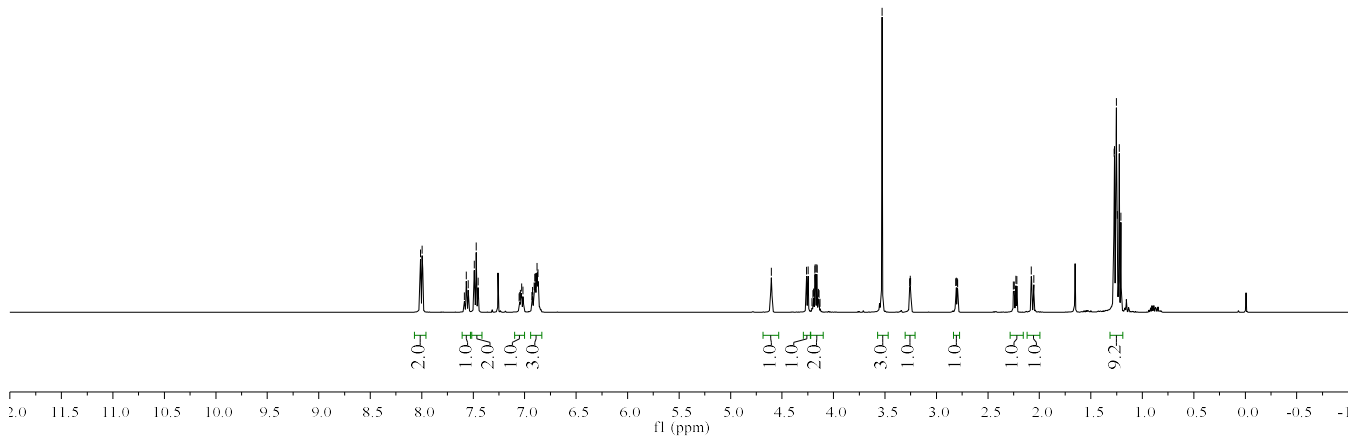

201.87  
174.06  
173.11  
162.41  
159.98  
139.18  
138.34  
133.04  
132.97  
132.93  
132.61  
132.53  
131.44  
131.36  
129.33  
128.68  
128.47  
114.86  
114.81  
114.64  
114.60  
61.11  
53.06  
52.75  
51.21  
41.53  
39.33  
37.81  
35.41  
27.92  
23.71  
20.16  
14.22

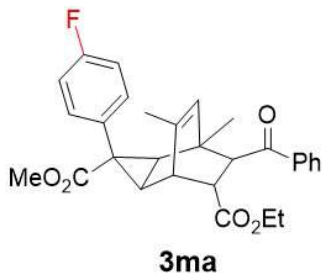

| Parameter              | Value                         |
|------------------------|-------------------------------|
| Title                  | wangsyuan-20220308-427.2.1.1r |
| Solvent                | CDCl3                         |
| Temperature            | 293.7                         |
| Number of Scans        | 256                           |
| Spectrometer Frequency | 100.63                        |
| Nucleus                | <sup>13</sup> C               |

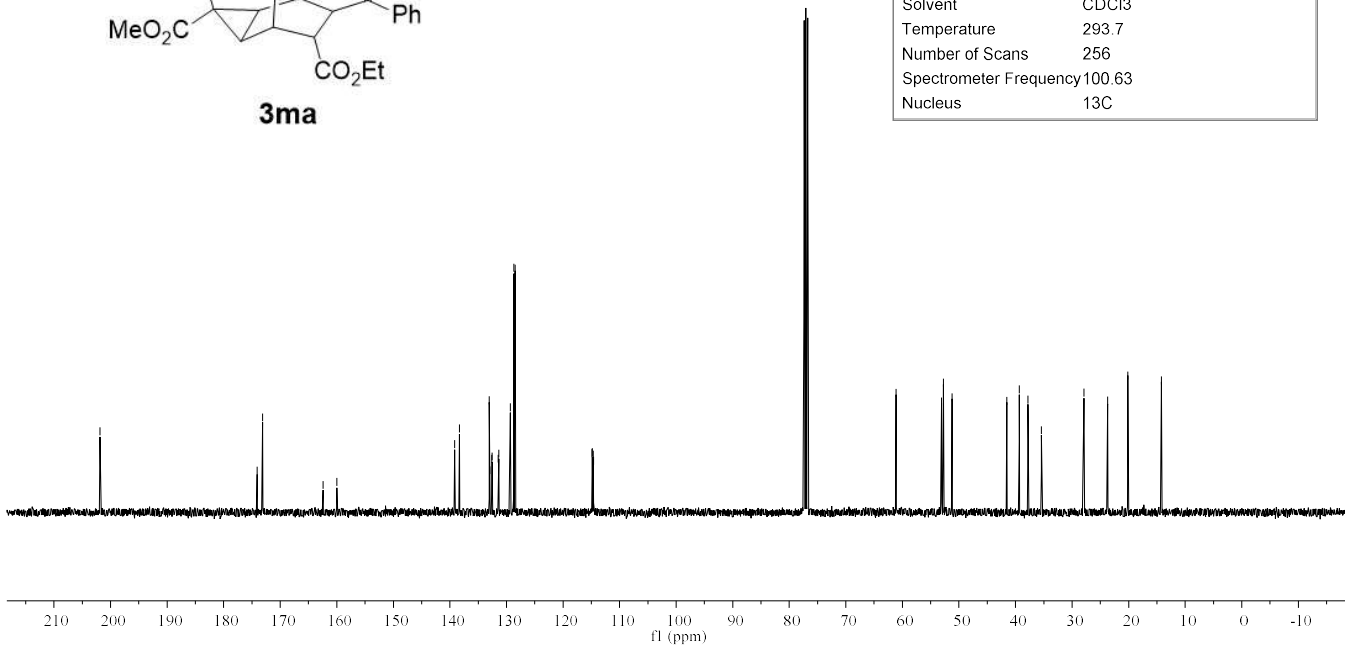

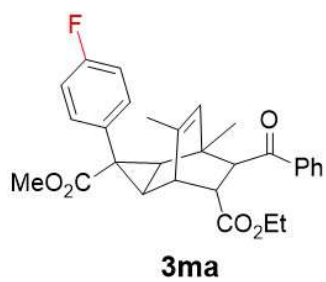

--||6.75

| Parameter              | Value                     |
|------------------------|---------------------------|
| Title                  | as-20220411-WSY-427.1.1.1 |
| Solvent                | CDCl3                     |
| Temperature            | 298.7                     |
| Number of Scans        | 16                        |
| Spectrometer Frequency | 376.50                    |
| Nucleus                | 19F                       |

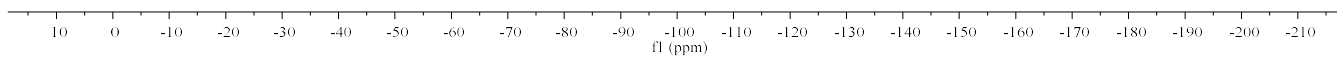

8.01  
8.00  
7.58  
7.57  
7.55  
7.48  
7.47  
7.46  
4.66  
4.59  
4.26  
4.26  
4.25  
4.25  
4.19  
4.19  
4.18  
4.18  
4.18  
4.17  
4.16  
4.16  
4.16  
3.54  
3.54  
3.28  
3.28  
3.27  
3.26  
3.26  
2.81  
2.80  
2.27  
2.26  
2.26  
2.25  
2.23  
2.23  
2.22  
2.21  
2.10  
2.09  
2.07  
2.06  
1.32  
1.31  
1.27  
1.26  
1.24  
1.24  
1.23  
1.22  
1.22

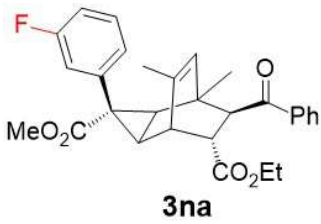

| Parameter              | Value                      |
|------------------------|----------------------------|
| Title                  | as-20211129-WSY-383.1.1.1r |
| Solvent                | CDCl3                      |
| Temperature            | 296.8                      |
| Number of Scans        | 16                         |
| Spectrometer Frequency | 600.17                     |
| Nucleus                | 1H                         |

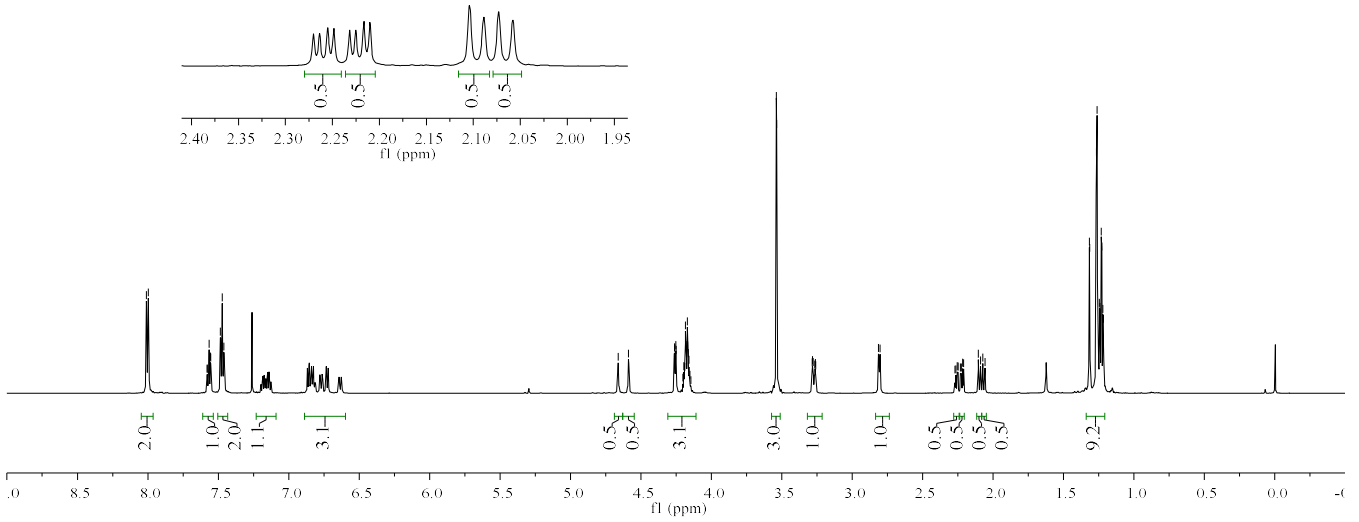

201.84  
201.80  
173.67  
173.64  
173.08  
173.06  
163.14  
163.11  
161.51  
161.48  
139.85  
139.22  
139.20  
138.41  
138.04  
133.04  
129.68  
129.59  
129.38  
129.33  
129.06  
129.00  
128.69  
128.47  
126.79  
126.04  
117.91  
117.78  
117.31  
117.17  
113.20  
113.06  
112.97  
112.83  
61.12  
53.08  
53.03  
52.78  
51.19  
41.49  
41.42  
39.33  
39.26  
38.02  
37.99  
28.04  
27.99  
23.71  
23.62  
20.17  
19.97  
14.93

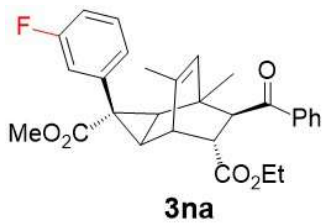

| Parameter              | Value                      |
|------------------------|----------------------------|
| Title                  | as-20211129-WSY-383.2.1.1r |
| Solvent                | CDCl3                      |
| Temperature            | 297.6                      |
| Number of Scans        | 256                        |
| Spectrometer Frequency | 150.91                     |
| Nucleus                | 13C                        |

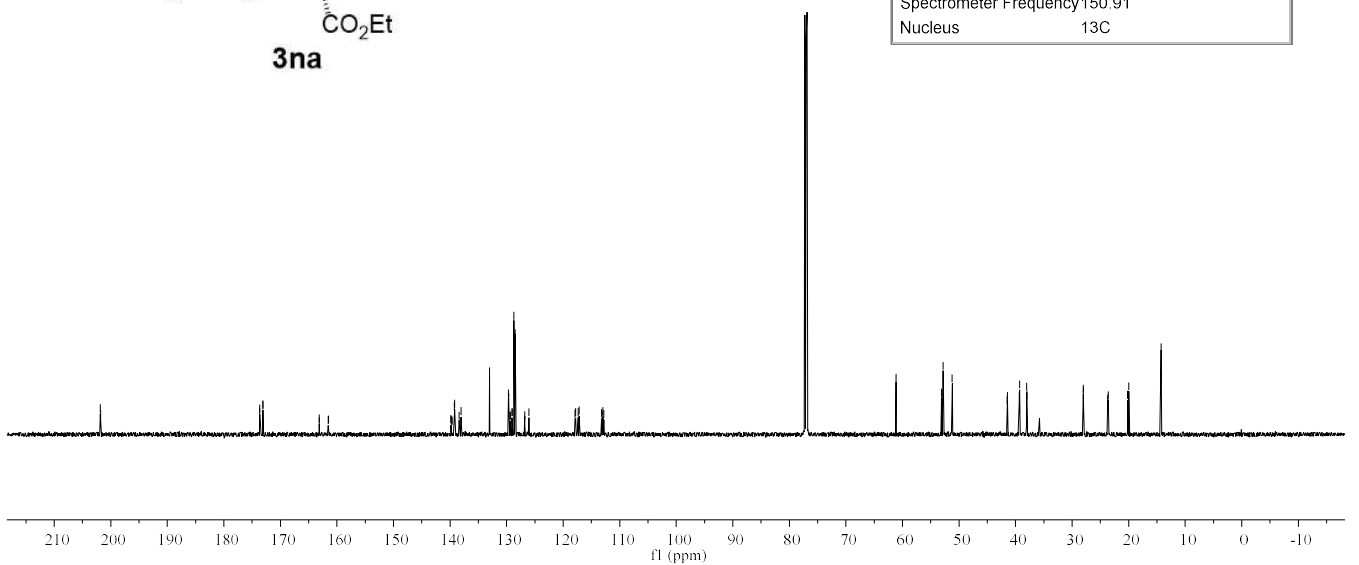

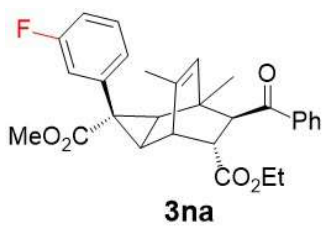

| Parameter              | Value                      |
|------------------------|----------------------------|
| Title                  | as-20211129-WSY-383.3.1.1r |
| Solvent                | CDCl3                      |
| Temperature            | 297.0                      |
| Number of Scans        | 16                         |
| Spectrometer Frequency | 564.72                     |
| Nucleus                | <sup>19</sup> F            |

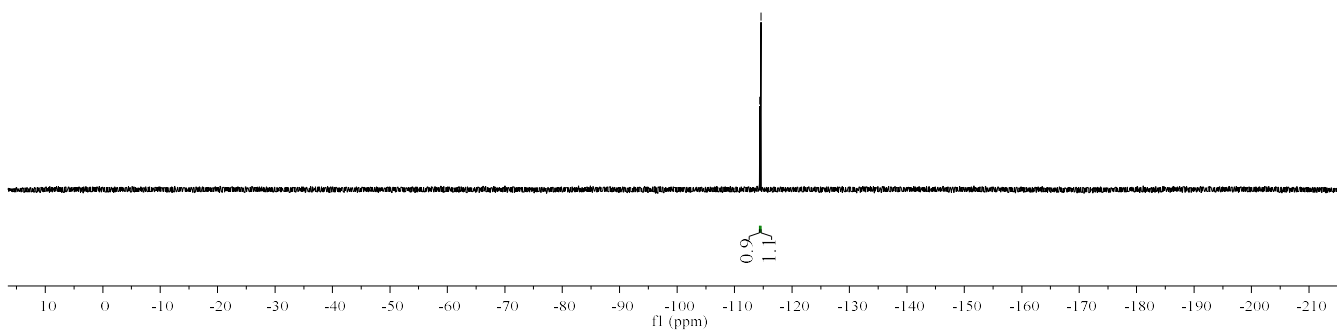

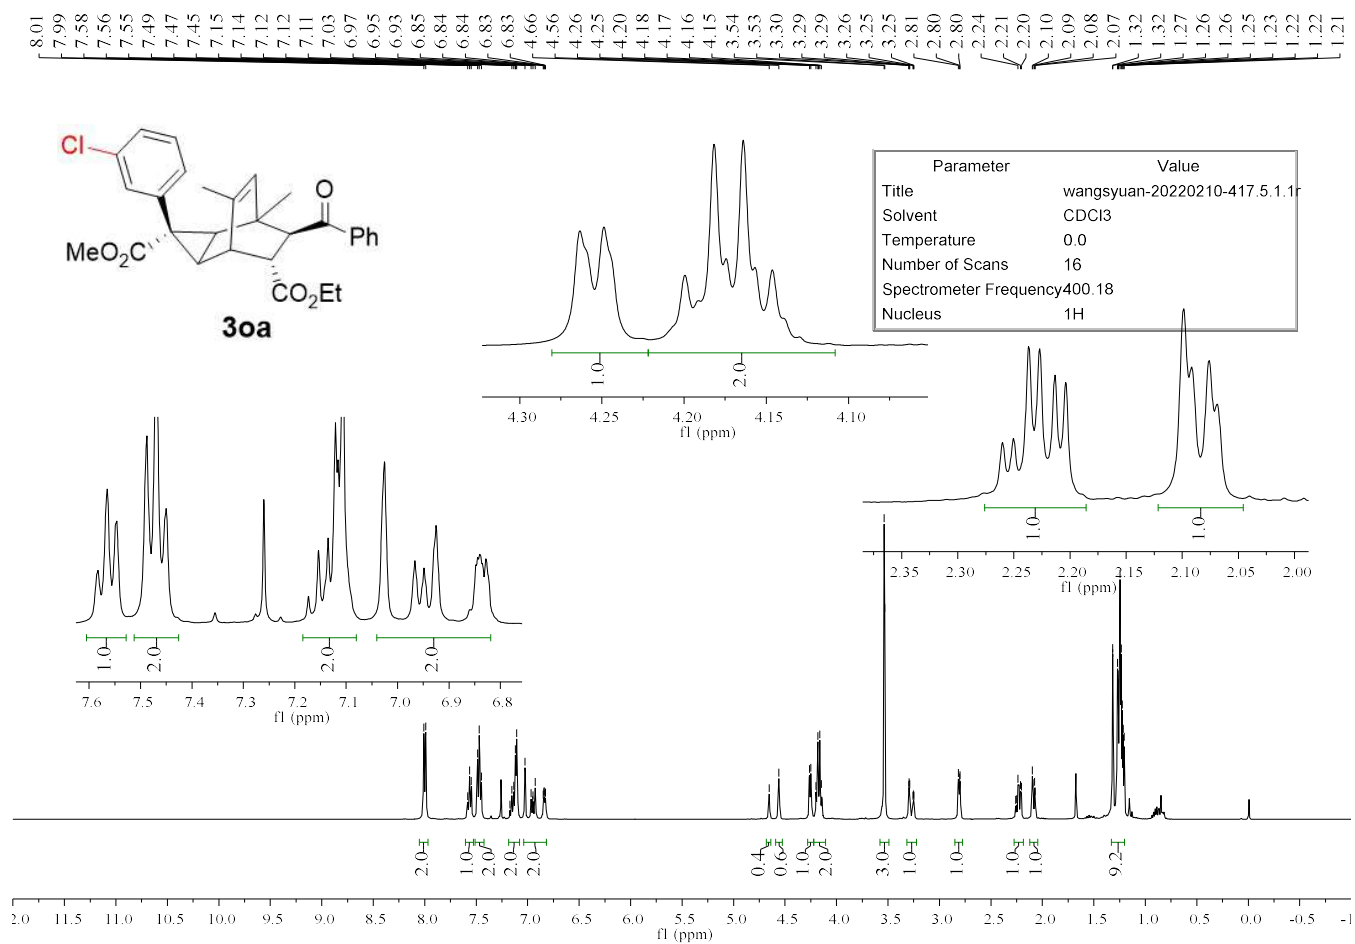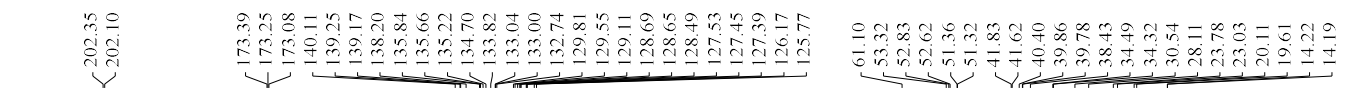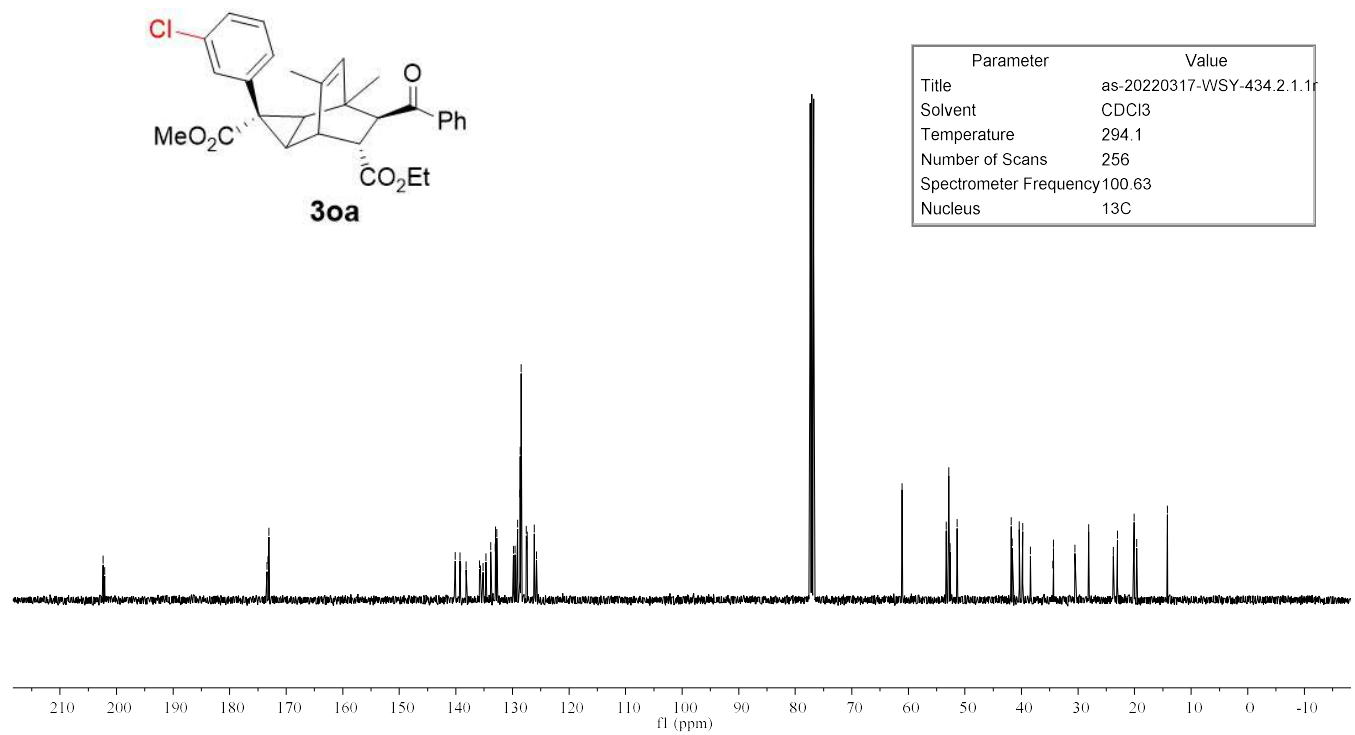



8.02, 8.00, 7.56, 7.55, 7.53, 7.49, 7.47, 7.46, 7.44, 4.79, 4.53, 4.30, 4.29, 4.28, 4.27, 4.21, 4.20, 4.19, 4.18, 4.17, 4.17, 4.16, 4.15, 3.53, 3.52, 3.28, 3.28, 3.27, 3.25, 2.80, 2.79, 2.78, 2.78, 2.70, 2.70, 2.69, 2.68, 2.26, 2.25, 2.24, 2.24, 2.22, 2.22, 2.10, 2.07, 2.05, 1.61, 1.60, 1.30, 1.25, 1.23, 1.21, 1.02, 1.00, 0.98, 0.46, 0.42

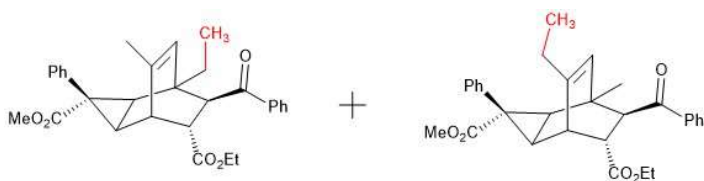

| Parameter              | Value                          |
|------------------------|--------------------------------|
| Title                  | wsyuan-20221222-WSY-Cat.1.1.1f |
| Solvent                | CDCl3                          |
| Temperature            | 297.4                          |
| Number of Scans        | 16                             |
| Spectrometer Frequency | 400.13                         |
| Nucleus                | 1H                             |

3ra

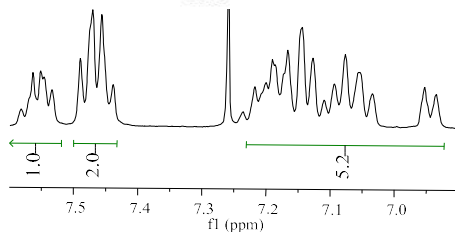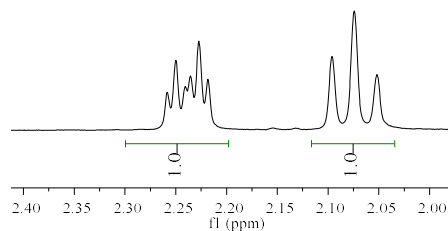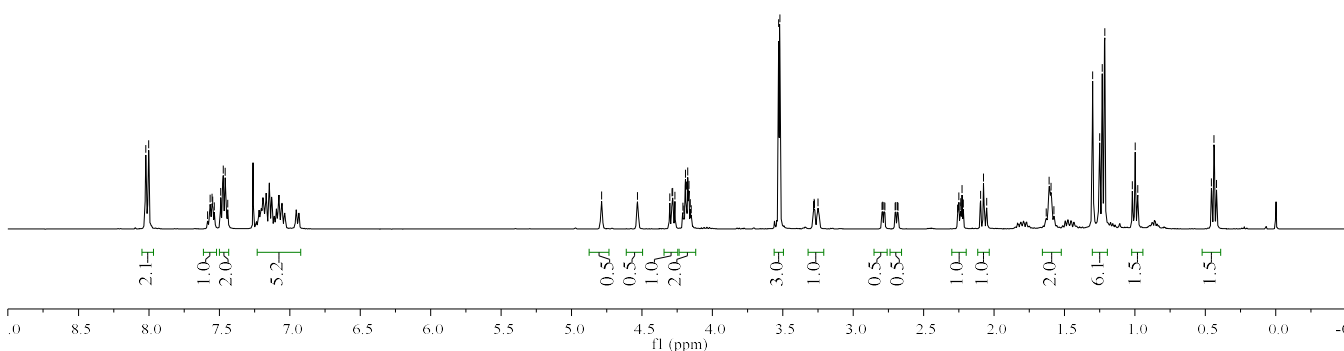

202.71, 201.86, 174.26, 173.24, 173.16, 143.01, 139.31, 139.12, 138.68, 137.00, 132.91, 131.19, 131.14, 130.51, 129.93, 128.64, 128.61, 128.47, 128.45, 128.24, 128.04, 127.90, 127.45, 126.85, 125.95, 125.93, 61.00, 53.17, 52.70, 52.19, 51.82, 51.60, 46.24, 41.43, 39.89, 38.96, 37.91, 36.20, 35.92, 35.32, 28.94, 27.65, 27.05, 26.44, 23.87, 20.00, 14.22, 10.60, 9.80

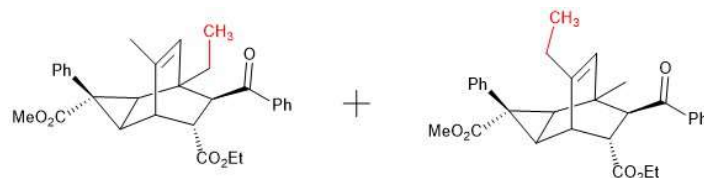

| Parameter              | Value                          |
|------------------------|--------------------------------|
| Title                  | wsyuan-20221222-WSY-Cat.2.1.1f |
| Solvent                | CDCl3                          |
| Temperature            | 297.6                          |
| Number of Scans        | 256                            |
| Spectrometer Frequency | 100.61                         |
| Nucleus                | 13C                            |

3ra

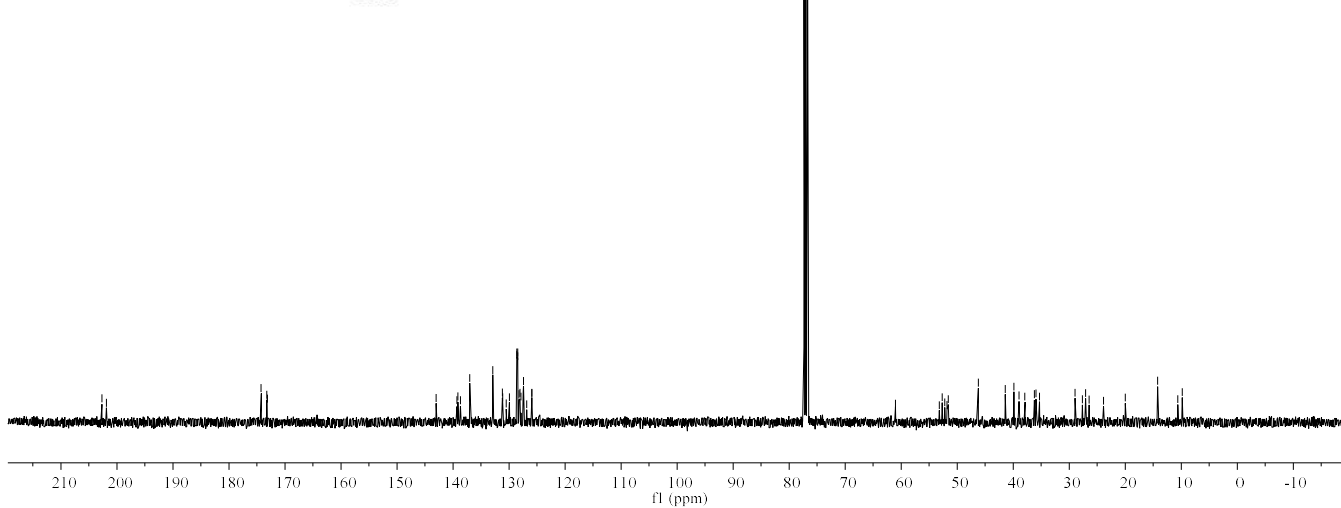



7.66  
7.64  
7.64  
7.54  
7.54  
7.53  
7.52  
7.52  
7.51  
7.50  
7.50  
7.44  
7.42  
7.40

4.84  
4.36  
4.36  
4.35  
4.35  
4.34

3.51

2.52  
2.51  
2.50  
2.49  
2.15  
2.13  
1.74  
1.21  
1.21

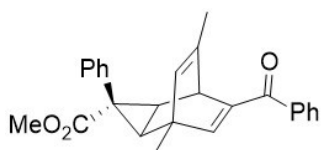

5aa

| Parameter              | Value                      |
|------------------------|----------------------------|
| Title                  | wsyuan-20220421-N-1.1.1.1r |
| Solvent                | CDCl <sub>3</sub>          |
| Temperature            | 297.4                      |
| Number of Scans        | 16                         |
| Spectrometer Frequency | 400.13                     |
| Nucleus                | <sup>1</sup> H             |

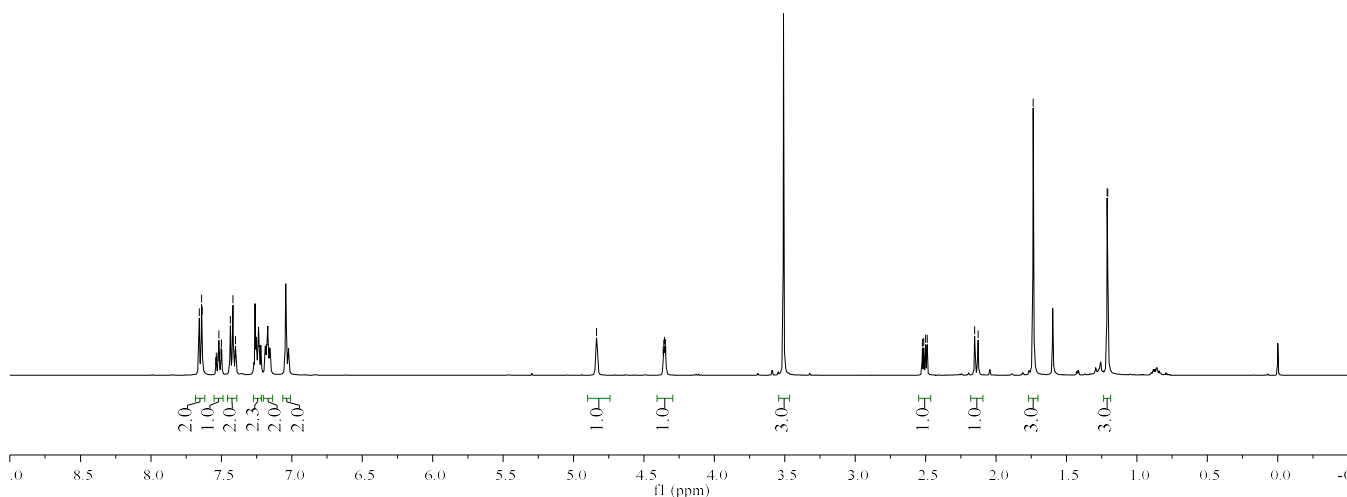

192.53

173.06

161.60

153.52

143.43

138.19

136.76

134.28

131.85

131.06

130.38

129.07

128.19

127.95

127.23

126.11

52.65

50.62

46.46

44.19

42.70

39.18

22.31

20.11

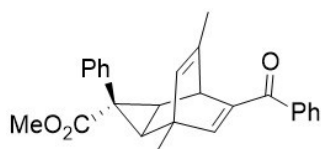

5aa

| Parameter              | Value                      |
|------------------------|----------------------------|
| Title                  | wsyuan-20220421-N-1.2.1.1r |
| Solvent                | CDCl <sub>3</sub>          |
| Temperature            | 297.5                      |
| Number of Scans        | 256                        |
| Spectrometer Frequency | 100.61                     |
| Nucleus                | <sup>13</sup> C            |

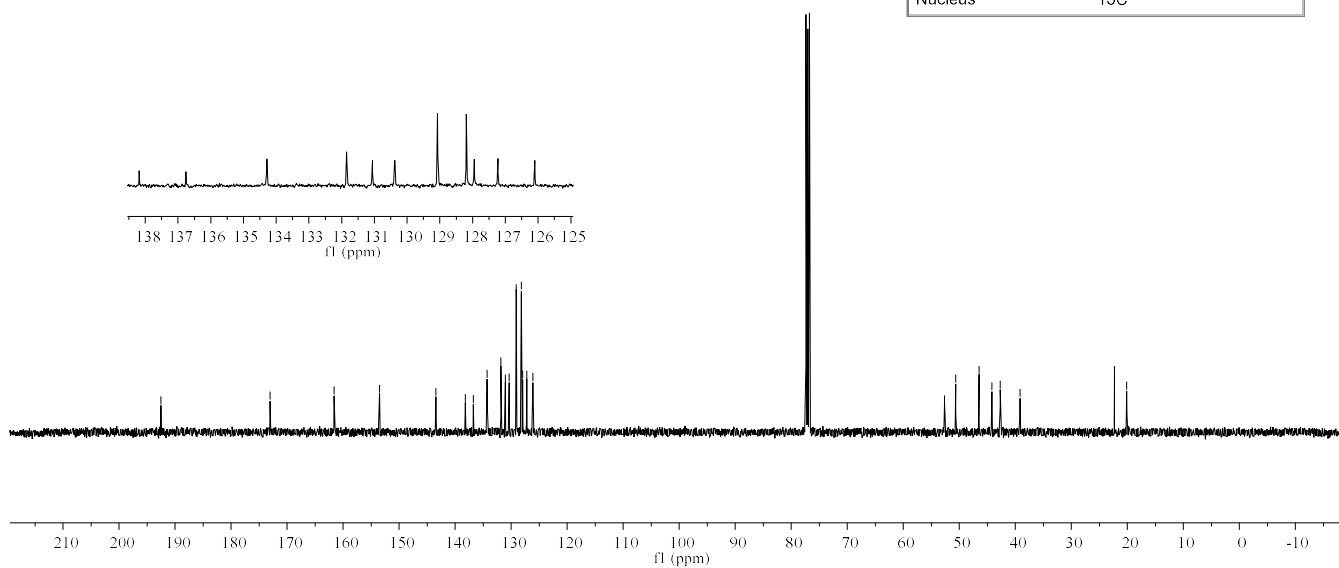

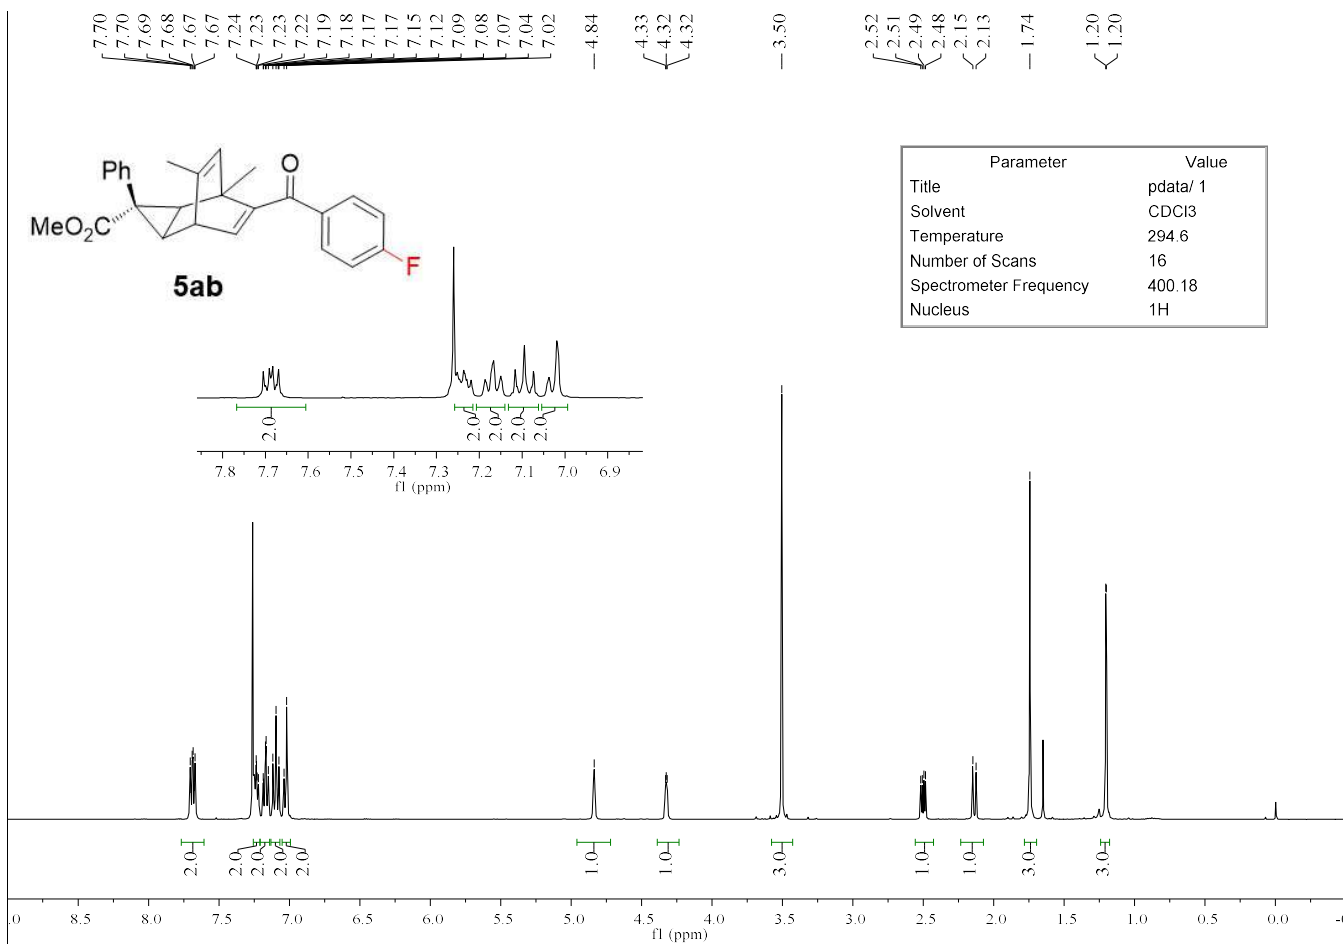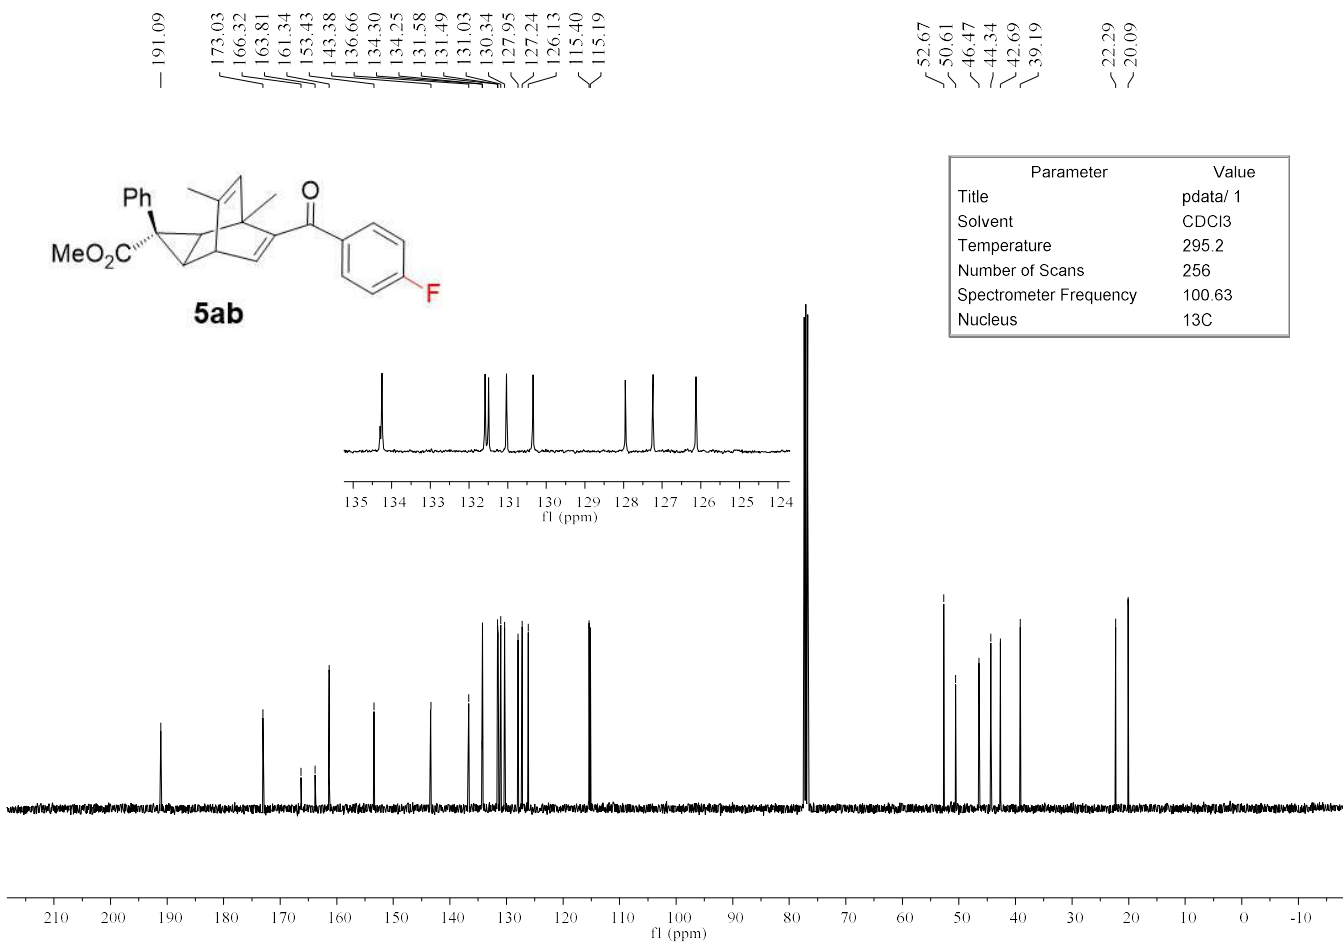

-107.14

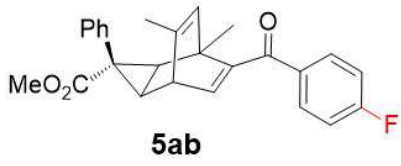

| Parameter              | Value             |
|------------------------|-------------------|
| Title                  | pdata/ 1          |
| Solvent                | CDCl <sub>3</sub> |
| Temperature            | 294.9             |
| Number of Scans        | 16                |
| Spectrometer Frequency | 376.55            |
| Nucleus                | <sup>19</sup> F   |

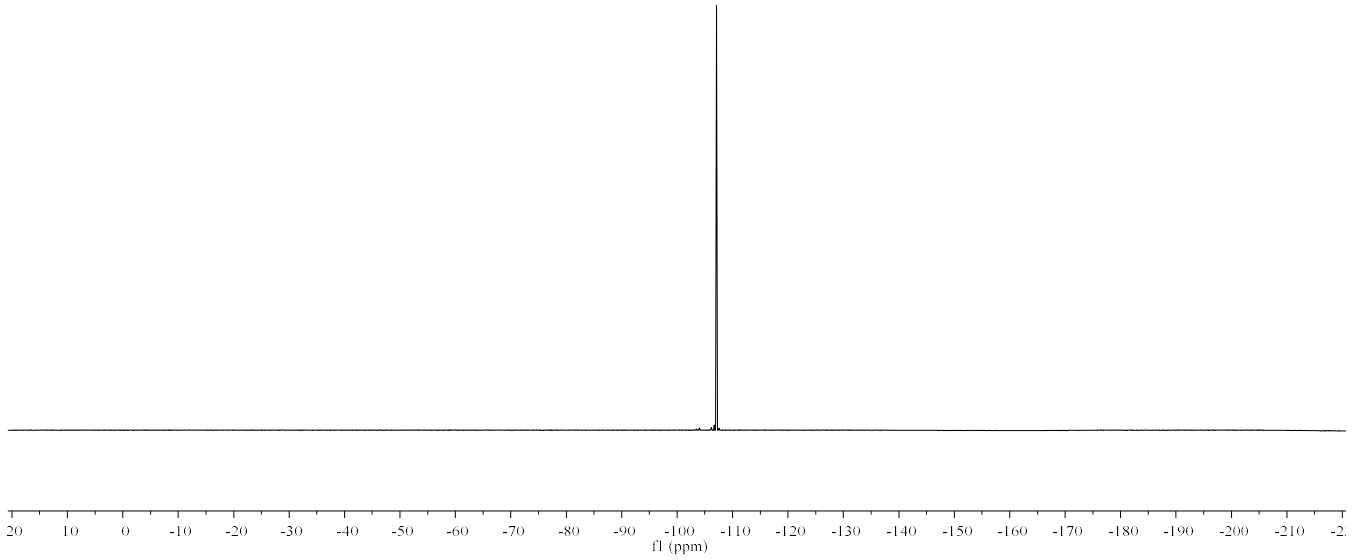

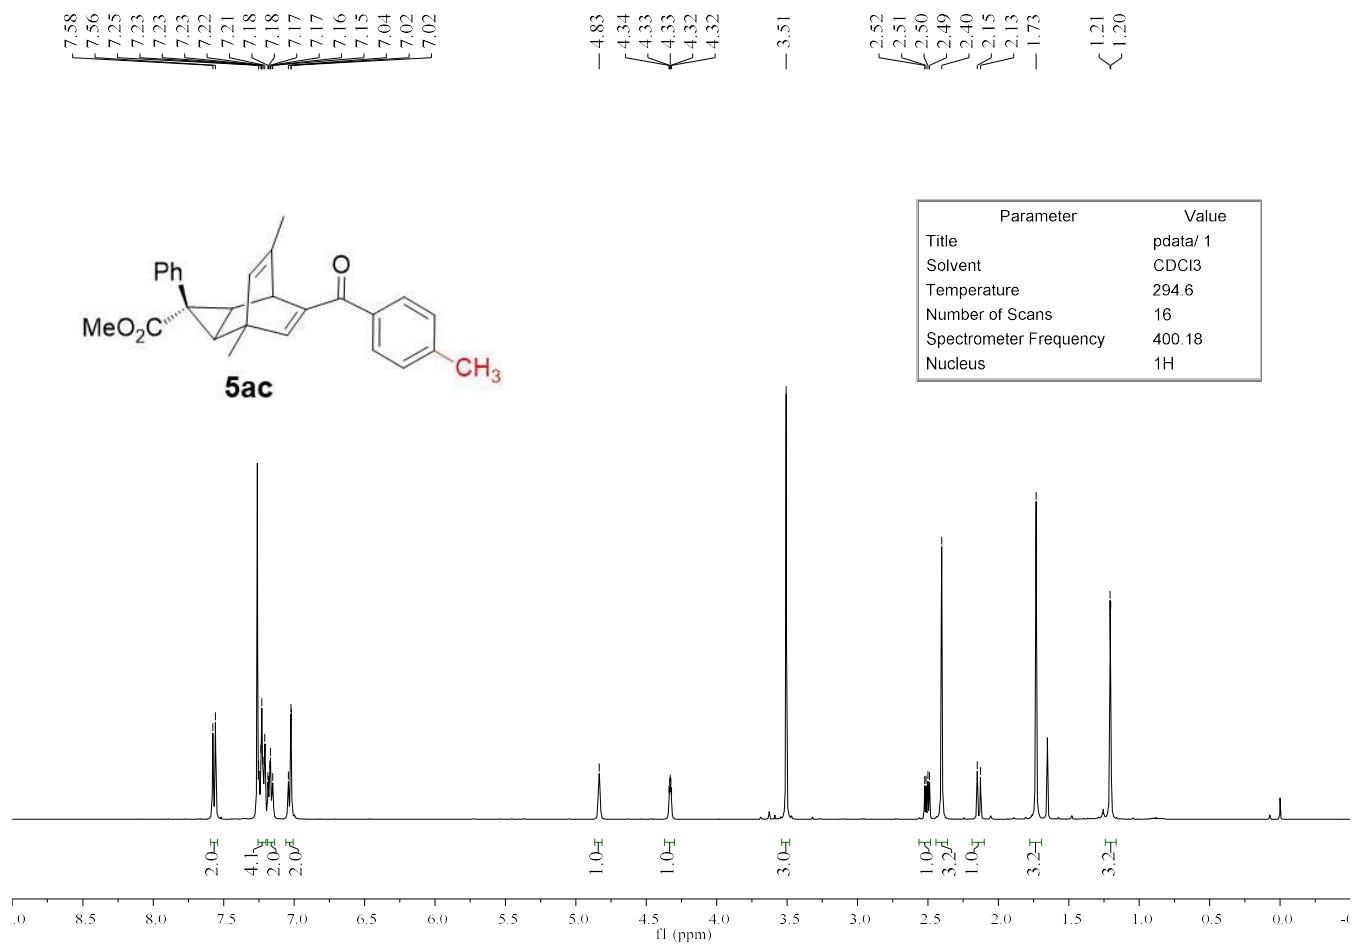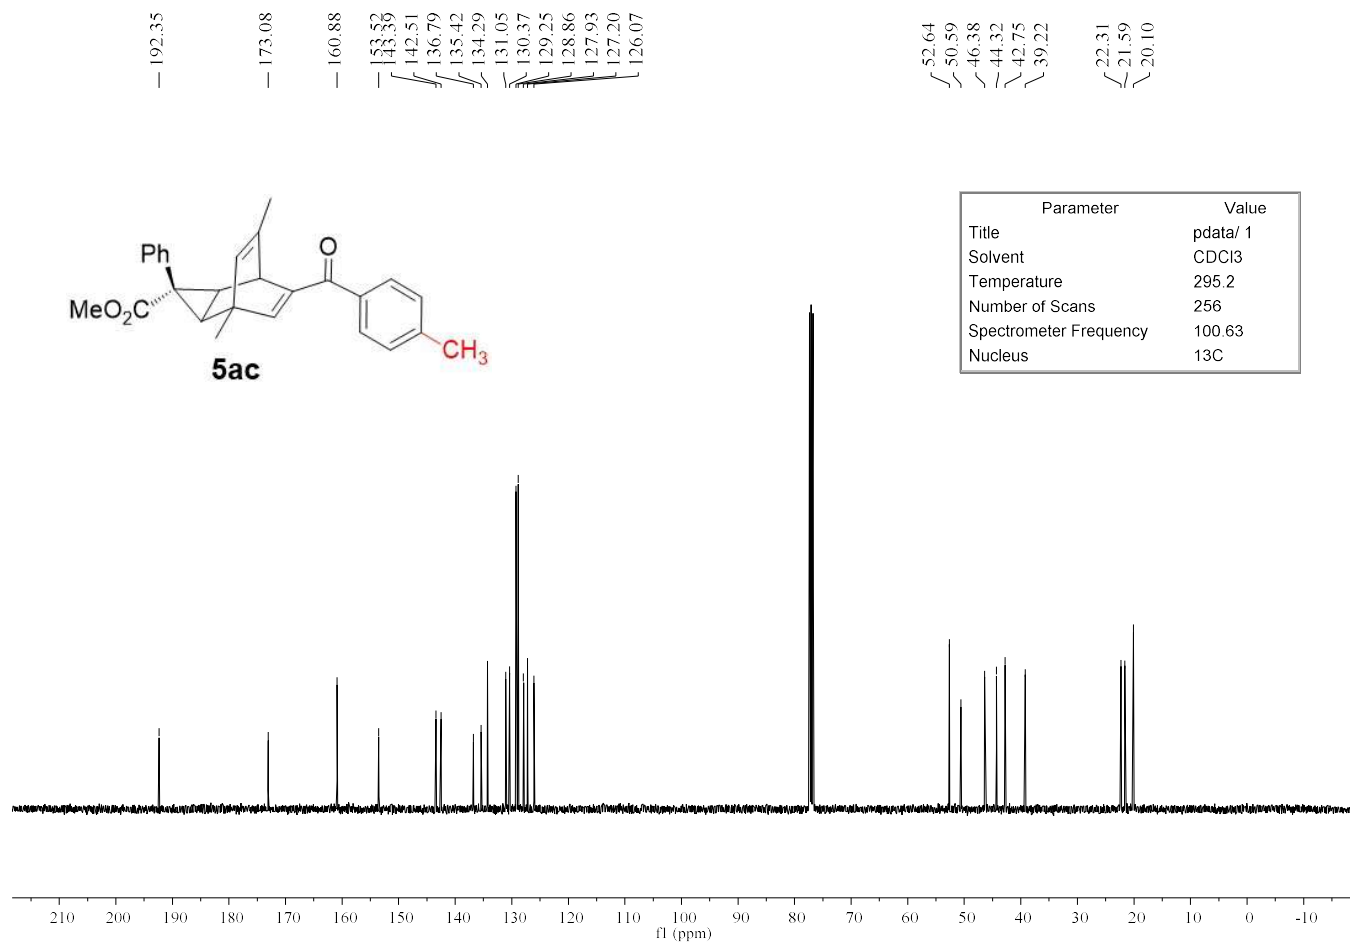

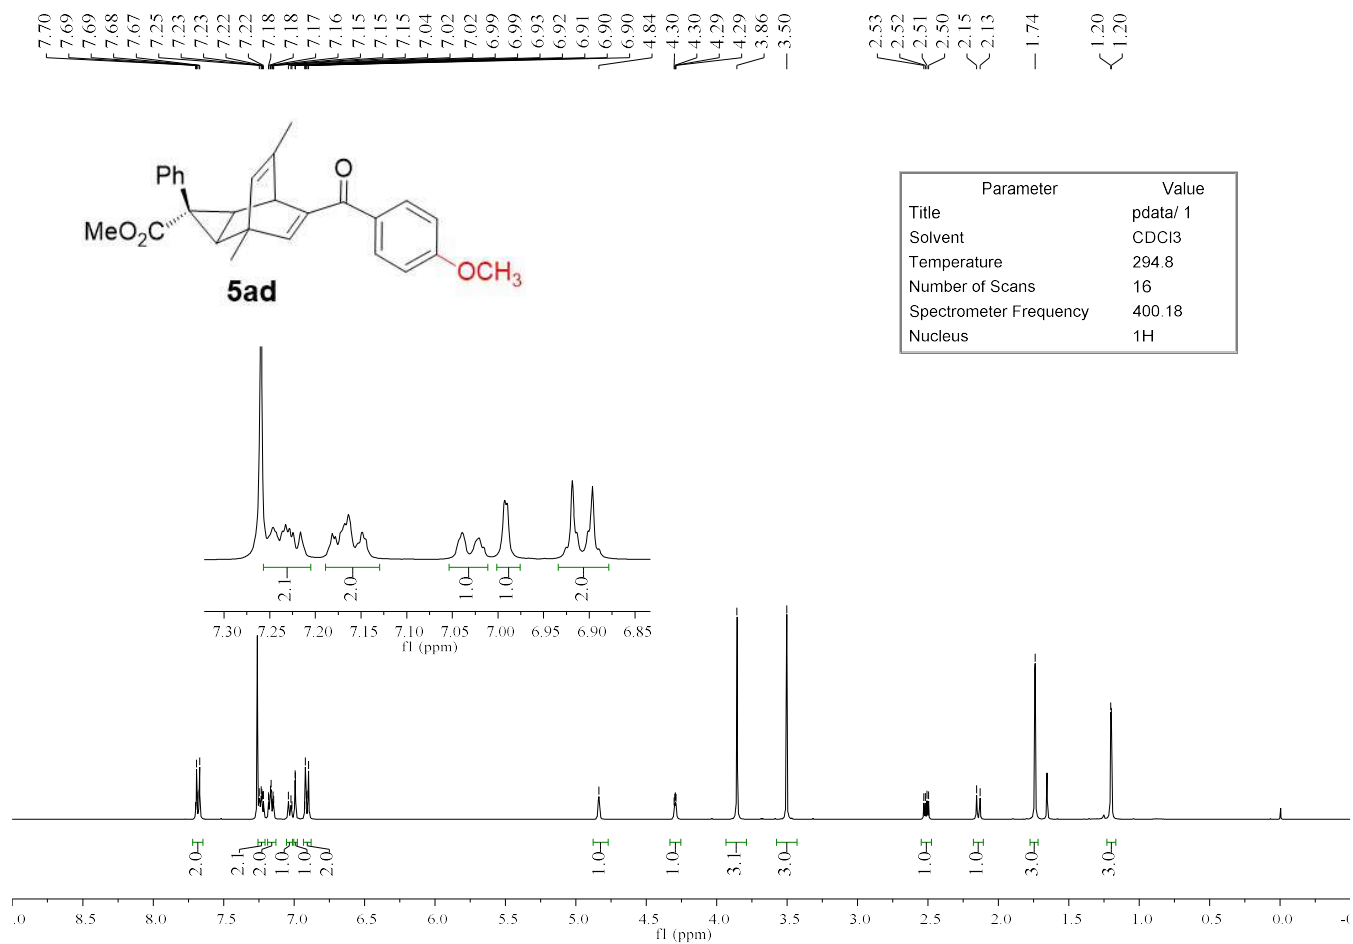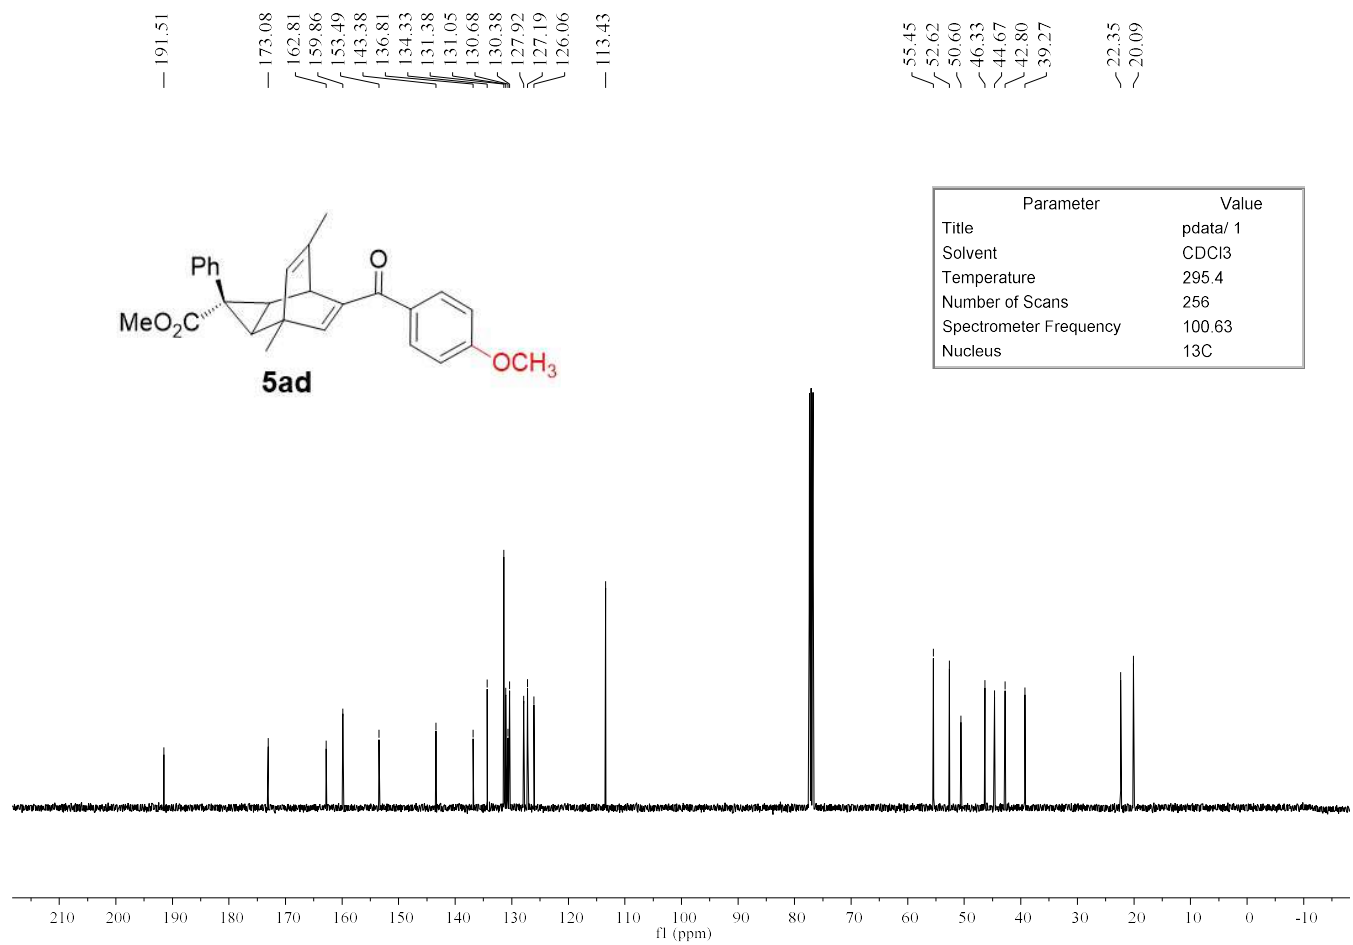

7.39  
7.39  
7.38  
7.24  
7.24  
7.22  
7.22  
7.21  
7.19  
7.19  
7.18  
7.17  
7.17  
7.16  
7.16  
7.14  
7.14  
7.02  
7.00  
6.97  
6.96  
6.94  
6.92  
6.89  
6.88  
4.37  
4.36  
4.36  
4.35  
4.35  
3.77  
3.50

2.49  
2.48  
2.47  
2.46  
2.12  
2.09  
1.67  
1.20  
1.19

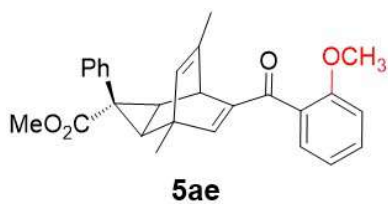

| Parameter              | Value    |
|------------------------|----------|
| Title                  | pdata/ 1 |
| Solvent                | CDCl3    |
| Temperature            | 294.8    |
| Number of Scans        | 16       |
| Spectrometer Frequency | 400.18   |
| Nucleus                | 1H       |

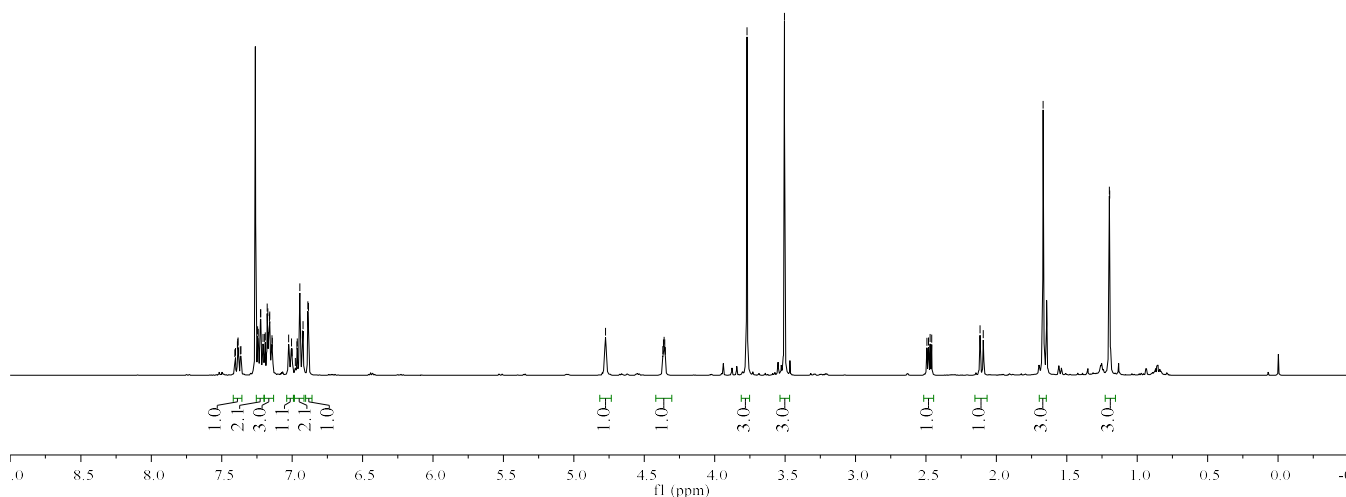

192.11  
173.16  
161.79  
157.08  
155.05  
143.34  
136.79  
134.16  
131.25  
131.04  
130.35  
129.09  
129.06  
127.90  
127.17  
126.05  
119.93  
111.53

55.69  
52.64  
50.54  
46.28  
42.94  
42.57  
39.09  
22.18  
20.04

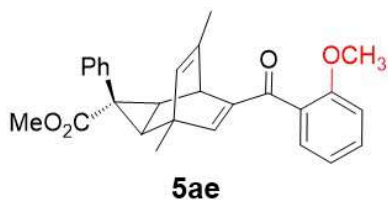

| Parameter              | Value    |
|------------------------|----------|
| Title                  | pdata/ 1 |
| Solvent                | CDCl3    |
| Temperature            | 295.3    |
| Number of Scans        | 256      |
| Spectrometer Frequency | 100.63   |
| Nucleus                | 13C      |

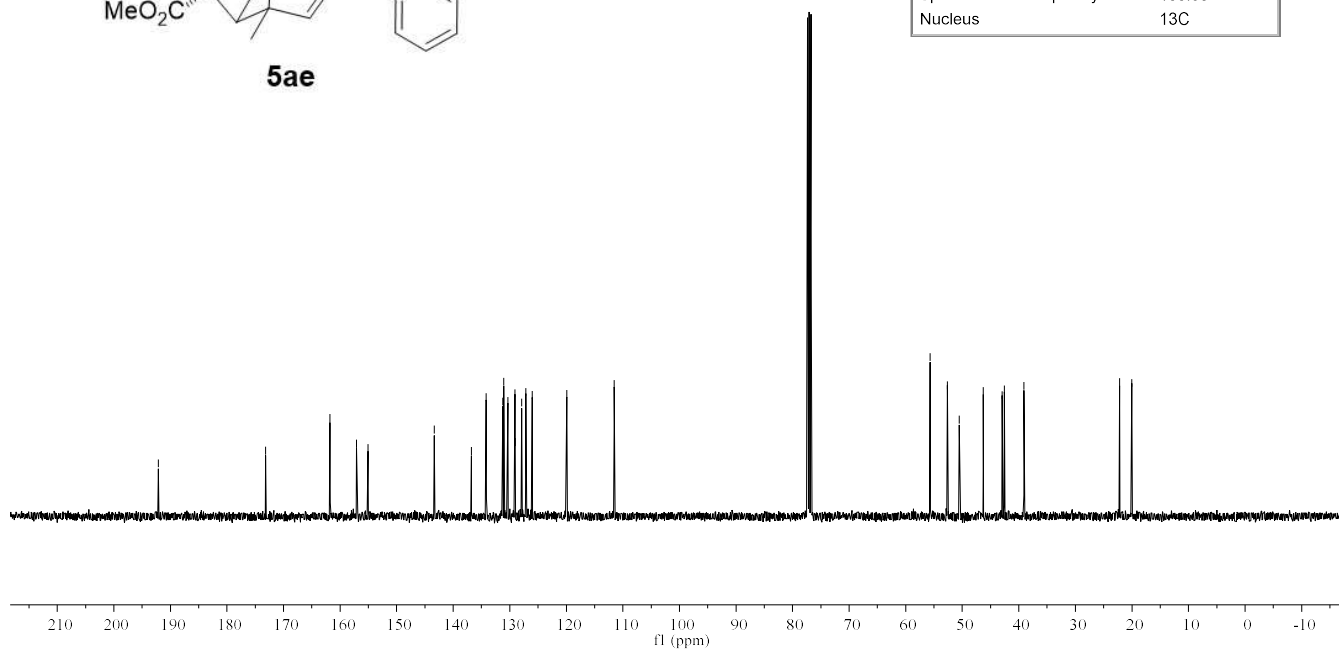

S170

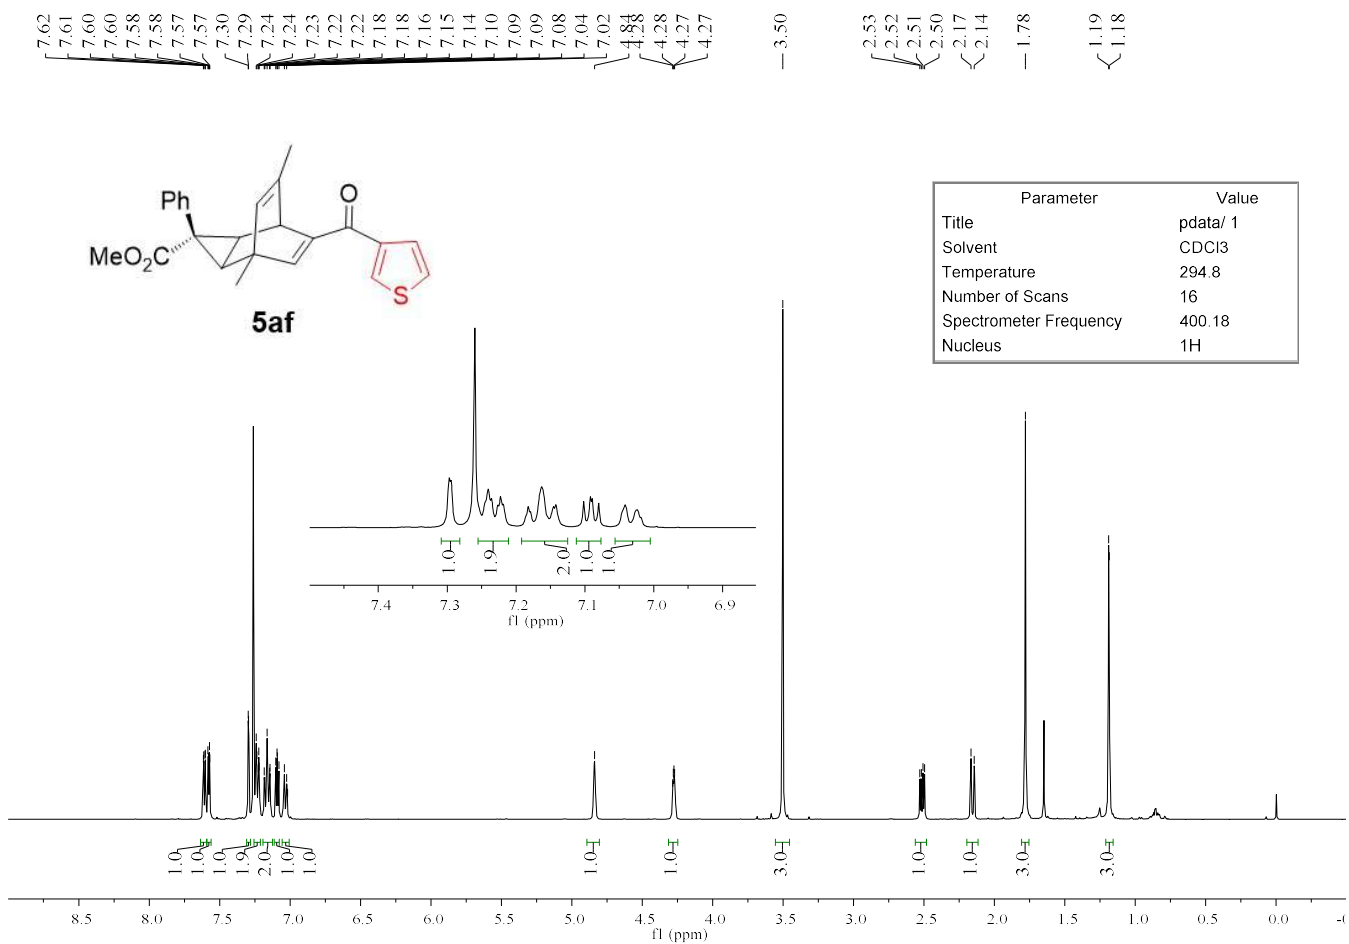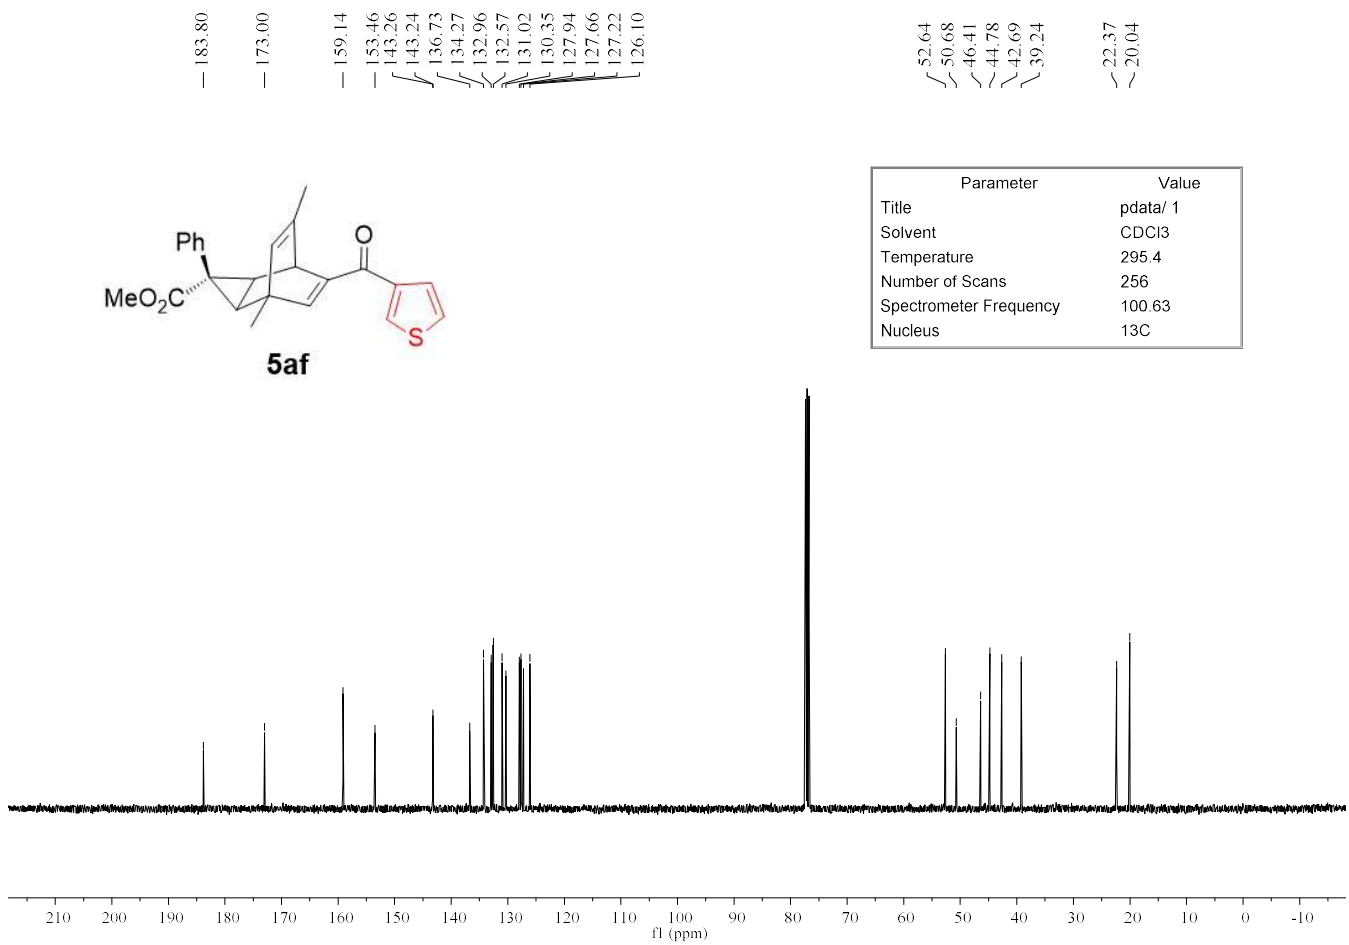





7.20  
7.19  
7.18  
7.17  
7.15  
7.15  
7.14  
7.14  
7.13  
7.12  
7.11  
7.10  
7.06  
7.05  
7.03  
6.99  
6.97  
6.94  
6.92

4.75  
4.74

4.20

3.64  
3.63  
3.52  
3.48  
3.46  
3.44  
3.28  
3.26  
3.18  
3.17  
2.51  
2.50  
2.50  
1.79  
1.77  
1.76  
1.75  
1.63  
1.61  
1.60  
1.58  
1.33  
1.32  
1.31  
1.30  
1.15  
1.13

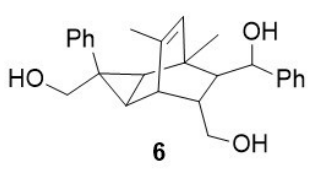

| Parameter              | Value                            |
|------------------------|----------------------------------|
| Title                  | wangsyuan-20220226-ah4-2.1.1.1.r |
| Solvent                | CDCl3                            |
| Temperature            | 0.0                              |
| Number of Scans        | 16                               |
| Spectrometer Frequency | 400.18                           |
| Nucleus                | 1H                               |

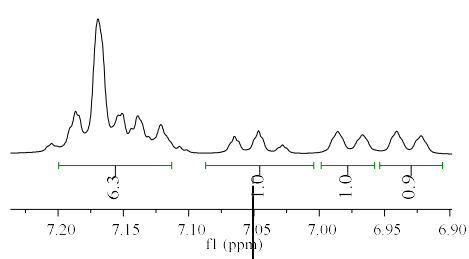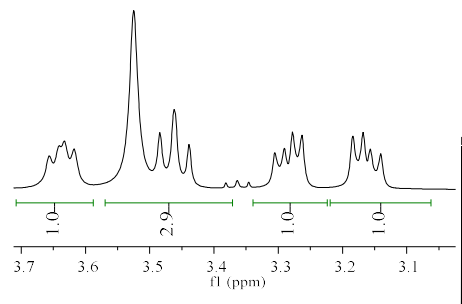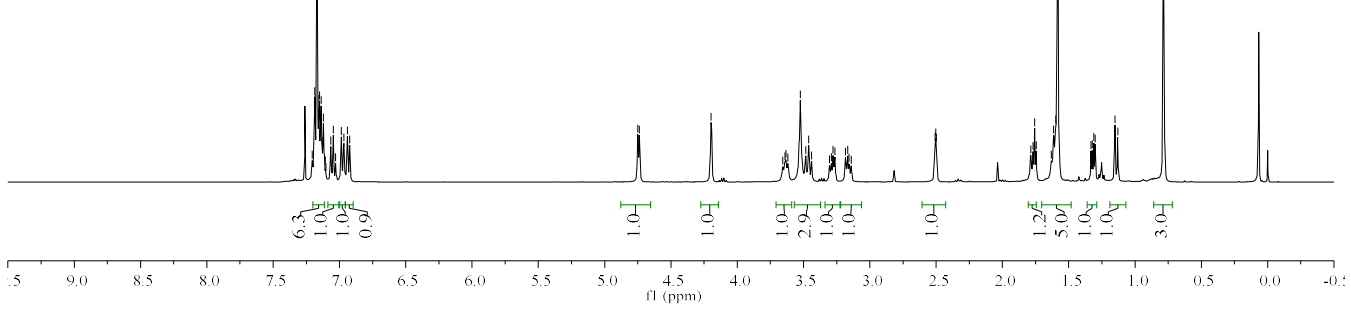

142.15  
140.10  
136.49  
129.92  
128.87  
128.42  
127.15  
126.84  
126.63  
126.54  
126.13  
124.35

73.36  
72.12  
65.10

56.81  
42.94  
38.10  
36.95  
34.41  
32.98  
23.65  
21.24  
18.83

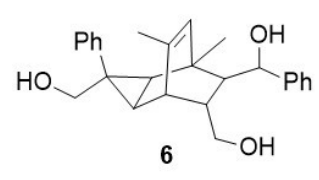

| Parameter              | Value                            |
|------------------------|----------------------------------|
| Title                  | wangsyuan-20220226-ah4-2.2.1.1.r |
| Solvent                | CDCl3                            |
| Temperature            | 0.0                              |
| Number of Scans        | 256                              |
| Spectrometer Frequency | 100.63                           |
| Nucleus                | 13C                              |

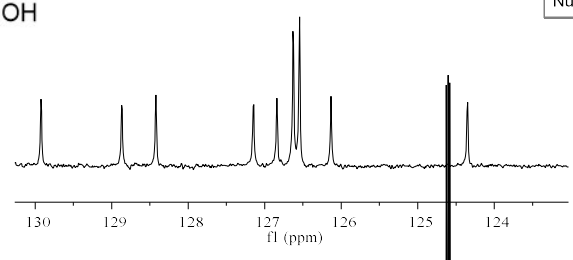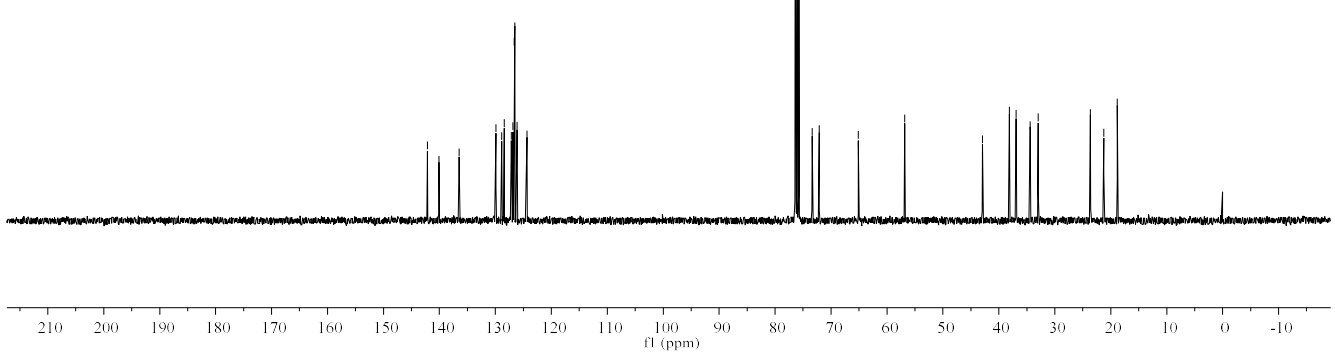

Supplement: d2sc06490a1.pdf [file d2sc06490a1.pdf]
